# Supplementary material for: A familial natural short sleep mutation promotes healthy aging and extends lifespan in Drosophila
Source: Research Square preprint supplement (doi:10.21203/rs.3.rs-2882949/v1), 2023-06-02
Supplement: Supplementary file 1 [file 24621a039847446ccca8cf20.xlsx]

## Sheet: P384RvsDecWT
gene_id	P384R_1	P384R_2	P384R_3	DecWT_1	DecWT_2	DecWT_3	log2FoldChange	pvalue	padj	DIFFEXP	gene_name	FLYBASE	desc
FBgn0266647	9.96	7.93	7.58	0	0	0	9.26711	1.92003e-14	1.86075e-11	UP	CG45154	LINK	This gene is referred to in FlyBase by the symbol Dmel\CG45154 (FBgn0266647). It is a protein_coding_gene from Dmel. It has one annotated transcript and one polypeptide. Gene sequence location is X:21146281..21147041. Its molecular function is described by: . It is involved in the biological process described with: . No alleles are reported.
novel.182	1.22	0.94	0.79	0	0	0	7.46055	4.26255e-09	1.78635e-06	UP	-	LINK
FBgn0266071	3.84	2.69	3.14	0	0	0	7.41653	5.3002e-09	2.00451e-06	UP	lncRNA:CR44824	LINK	The gene long non-coding RNA:CR44824 is referred to in FlyBase by the symbol Dmel\lncRNA:CR44824 (CR44824, FBgn0266071). It is a non_protein_coding_gene from Dmel. It has one annotated transcript. Gene sequence location is 2L:6138867..6139309. Its molecular function is unknown. The biological processes in which it is involved are not known. One allele is reported. No phenotypic data is available.…
FBgn0031104	2.66	2.75	1.63	0	0	0	7.37335	7.9427e-09	2.86418e-06	UP	jb	LINK	The gene jean-baptiste is referred to in FlyBase by the symbol Dmel\jb (CG15460, FBgn0031104). It is a protein_coding_gene from Dmel. It has one annotated transcript and one polypeptide. Gene sequence location is X:20390096..20390806. Its molecular function is described by: . It is involved in the biological process described with: pupation. 2 alleles are reported. No phenotypic data is available…
FBgn0265533	0.51	2.44	2.67	0	0	0	6.5454	2.77704e-06	0.000559231	UP	CR44383	LINK	This gene is referred to in FlyBase by the symbol Dmel\CR44383 (FBgn0265533). It is a pseudogene_attribute from Dmel. It has 2 annotated transcripts. Gene sequence location is X:15796477..15796897. Its molecular function is unknown. The biological processes in which it is involved are not known. One allele is reported. No phenotypic data is available. No phenotypic class data is available.
FBgn0037420	0	0	0	0.35	0.53	0.48	-5.06656	0.000981876	0.0822971		CG15597	=HYPERLINK("http://flybase.org/reports/FBgn0037420", "LINK")	This gene is referred to in FlyBase by the symbol Dmel\CG15597 (FBgn0037420). It is a protein_coding_gene from Dmel. It has one annotated transcript and one polypeptide. Gene sequence location is 3R:6284462..6285200. Its molecular function is unknown. The biological processes in which it is involved are not known. 2 alleles are reported. No phenotypic data is available. The phenotypic classes of …
FBgn0264868	0	0	0	0.18	0.34	0.31	-5.00208	0.00131066	0.10428		lncRNA:CR44059	=HYPERLINK("http://flybase.org/reports/FBgn0264868", "LINK")	The gene long non-coding RNA:CR44059 is referred to in FlyBase by the symbol Dmel\lncRNA:CR44059 (CR44059, FBgn0264868). It is a non_protein_coding_gene from Dmel. It has one annotated transcript. Gene sequence location is 2L:4246209..4249676. Its molecular function is unknown. The biological processes in which it is involved are not known. One allele is reported. No phenotypic data is available.…
FBgn0040279	0	0	0	0.14	0.19	0.43	-4.91492	0.00215611	0.152855		Osi14	=HYPERLINK("http://flybase.org/reports/FBgn0040279", "LINK")	The gene Osiris 14 is referred to in FlyBase by the symbol Dmel\Osi14 (CG1155, FBgn0040279). It is a protein_coding_gene from Dmel. It has one annotated transcript and one polypeptide. Gene sequence location is 3R:6299128..6300738. Its molecular function is described by: . It is involved in the biological process described with: . 3 alleles are reported. No phenotypic data is available. No phenot…
FBgn0262536	0	0.17	0	0.19	0.17	4.13	-4.72776	0.0303799	0.712294		CG43090	=HYPERLINK("http://flybase.org/reports/FBgn0262536", "LINK")	This gene is referred to in FlyBase by the symbol Dmel\CG43090 (FBgn0262536). It is a protein_coding_gene from Dmel. It has one annotated transcript and one polypeptide. Gene sequence location is X:6199216..6199891. Its molecular function is described by: . It is involved in the biological process described with: . No alleles are reported.
FBgn0265727	1.05	1.67	1.87	0	0	0	6.46616	1.63995e-06	0.000358156	UP	lncRNA:CR44534	LINK	The gene long non-coding RNA:CR44534 is referred to in FlyBase by the symbol Dmel\lncRNA:CR44534 (CR44534, FBgn0265727). It is a non_protein_coding_gene from Dmel. It has one annotated transcript. Gene sequence location is X:9314685..9315171. Its molecular function is unknown. The biological processes in which it is involved are not known. No alleles are reported.
FBgn0267284	0	0	0	0.34	0	0.46	-4.57074	0.0135688	0.471744		lncRNA:CR45720	=HYPERLINK("http://flybase.org/reports/FBgn0267284", "LINK")	The gene long non-coding RNA:CR45720 is referred to in FlyBase by the symbol Dmel\lncRNA:CR45720 (CR45720, FBgn0267284). It is a non_protein_coding_gene from Dmel. It has one annotated transcript. Gene sequence location is 2L:4240014..4240820. Its molecular function is unknown. The biological processes in which it is involved are not known. No alleles are reported.
FBgn0266982	1.24	1.44	1.43	0	0	0	6.07279	1.18437e-05	0.00196251	UP	lncRNA:CR45433	LINK	The gene long non-coding RNA:CR45433 is referred to in FlyBase by the symbol Dmel\lncRNA:CR45433 (CR45433, FBgn0266982). It is a non_protein_coding_gene from Dmel. It has one annotated transcript. Gene sequence location is 3L:19861458..19861869. Its molecular function is unknown. The biological processes in which it is involved are not known. No alleles are reported.
FBgn0264601	0	0	0	0.1	0.27	0.04	-4.09749	0.0293635	0.702639		lncRNA:CR43950	=HYPERLINK("http://flybase.org/reports/FBgn0264601", "LINK")	The gene long non-coding RNA:CR43950 is referred to in FlyBase by the symbol Dmel\lncRNA:CR43950 (CR43950, FBgn0264601). It is a non_protein_coding_gene from Dmel. It has one annotated transcript. Gene sequence location is 3L:16017165..16018317. Its molecular function is described by: . It is involved in the biological process described with: . No alleles are reported.
FBgn0267812	0	0	0.13	0.67	0.88	0.34	-3.85541	0.0139233	0.478702		asRNA:CR46137	=HYPERLINK("http://flybase.org/reports/FBgn0267812", "LINK")	The gene antisense RNA:CR46137 is referred to in FlyBase by the symbol Dmel\asRNA:CR46137 (CR46137, FBgn0267812). It is a non_protein_coding_gene from Dmel. It has one annotated transcript. Gene sequence location is 3R:4737500..4737908. Its molecular function is unknown. The biological processes in which it is involved are not known. No alleles are reported.
FBgn0039679	0	0	0	0.13	0.03	0.09	-3.83272	0.049949	0.869258		ppk19	=HYPERLINK("http://flybase.org/reports/FBgn0039679", "LINK")	The gene pickpocket 19 is referred to in FlyBase by the symbol Dmel\ppk19 (CG18287, FBgn0039679). It is a protein_coding_gene from Dmel. It has one annotated transcript and one polypeptide. Gene sequence location is 3R:29672456..29674223. Its molecular function is described by: ligand-gated sodium channel activity; sodium channel activity. It is involved in the biological process described with 6…
FBgn0062517	0	0	0.05	0.1	0.27	0.24	-3.71423	0.0201693	0.592376		CG16984	=HYPERLINK("http://flybase.org/reports/FBgn0062517", "LINK")	This gene is referred to in FlyBase by the symbol Dmel\CG16984 (FBgn0062517). It is a protein_coding_gene from Dmel. It has one annotated transcript and one polypeptide. Gene sequence location is 3L:2595781..2596998. Its molecular function is described by: calmodulin binding. It is involved in the biological process described with: . 3 alleles are reported. No phenotypic data is available. No phe…
FBgn0052071	0	0	0.12	0.43	0.46	0.52	-3.57098	0.0266866	0.679892		CG32071	=HYPERLINK("http://flybase.org/reports/FBgn0052071", "LINK")	This gene is referred to in FlyBase by the symbol Dmel\CG32071 (FBgn0052071). It is a protein_coding_gene from Dmel. It has one annotated transcript and one polypeptide. Gene sequence location is 3L:11103421..11103873. Its molecular function is unknown. The biological processes in which it is involved are not known. 7 alleles are reported. No phenotypic data is available. No phenotypic class data…
FBgn0030311	3.19	2.21	1.2	0	0	0.12	5.79172	3.23592e-07	8.50445e-05	UP	CG11699	LINK	This gene is referred to in FlyBase by the symbol Dmel\CG11699 (FBgn0030311). It is a protein_coding_gene from Dmel. It has 2 annotated transcripts and 2 polypeptides (1 unique). Gene sequence location is X:11570621..11571718. Its molecular function is unknown. The biological processes in which it is involved are not known. 7 alleles are reported. No phenotypic data is available. The phenotypic c…
FBgn0032442	0	0.02	0	0.06	0.04	0.13	-3.45818	0.0381493	0.78454		CG15485	=HYPERLINK("http://flybase.org/reports/FBgn0032442", "LINK")	The gene Neprilysin-like 7 is referred to in FlyBase by the symbol Dmel\Nepl7 (CG15485, FBgn0032442). It is a protein_coding_gene from Dmel. It has 2 annotated transcripts and 2 polypeptides (1 unique). Gene sequence location is 2L:12667248..12669714. Its molecular function is described by: metalloendopeptidase activity. It is involved in the biological process described with: proteolysis. One al…
FBgn0266771	0.16	0	0	0.74	1.07	0.09	-3.41269	0.0209919	0.606146		lncRNA:CR45236	=HYPERLINK("http://flybase.org/reports/FBgn0266771", "LINK")	The gene long non-coding RNA:CR45236 is referred to in FlyBase by the symbol Dmel\lncRNA:CR45236 (CR45236, FBgn0266771). It is a non_protein_coding_gene from Dmel. It has one annotated transcript. Gene sequence location is 3L:22121932..22122746. Its molecular function is unknown. The biological processes in which it is involved are not known. No alleles are reported.
FBgn0265608	0.15	0	0	0.81	0.44	0.32	-3.28147	0.0210684	0.606333		CG44426	=HYPERLINK("http://flybase.org/reports/FBgn0265608", "LINK")	This gene is referred to in FlyBase by the symbol Dmel\CG44426 (FBgn0265608). It is a protein_coding_gene from Dmel. It has one annotated transcript and one polypeptide. Gene sequence location is X:20978286..20978868. Its molecular function is described by: . It is involved in the biological process described with: . No alleles are reported.
FBgn0002869	24.26	25.47	46.01	1.34	1.24	1.12	4.68805	6.81104e-47	5.2806e-43	UP	MtnB	LINK	The gene Metallothionein B is referred to in FlyBase by the symbol Dmel\MtnB (CG4312, FBgn0002869). It is a protein_coding_gene from Dmel. It has 3 annotated transcripts and 3 polypeptides (1 unique). Gene sequence location is 3R:20503102..20503746. Its molecular function is described by: metal ion binding; copper ion binding. It is involved in the biological process described with: metal ion hom…
novel.131	0	0.1	0.1	0.43	0.28	0.6	-2.8214	0.0478545	0.858833		-	=HYPERLINK("http://flybase.org/reports/novel.131", "LINK")
FBgn0051681	0.09	0.34	0.11	0.37	0.11	3.31	-2.816	0.00342595	0.205811		CG31681	=HYPERLINK("http://flybase.org/reports/FBgn0051681", "LINK")	This gene is referred to in FlyBase by the symbol Dmel\CG31681 (FBgn0051681). It is a protein_coding_gene from Dmel. It has one annotated transcript and one polypeptide. Gene sequence location is 2L:2285925..2286873. Its molecular function is described by: serine-type endopeptidase activity. It is involved in the biological process described with: proteolysis. 3 alleles are reported. No phenotypi…
FBgn0012042	3.56	3.22	3.39	3.97	23.03	41.11	-2.74166	0.00123717	0.0993968		AttA	=HYPERLINK("http://flybase.org/reports/FBgn0012042", "LINK")	The gene Attacin-A is referred to in FlyBase by the symbol Dmel\AttA (CG10146, FBgn0012042). It is a protein_coding_gene from Dmel. It has one annotated transcript and one polypeptide. Gene sequence location is 2R:14747362..14748215. Its molecular function is unknown. It is involved in the biological process described with 6 unique terms, many of which group under: response to stress; immune resp…
FBgn0264874	0.04	0.05	0.1	0.54	0.43	0.22	-2.69155	0.0105321	0.417329		asRNA:CR44065	=HYPERLINK("http://flybase.org/reports/FBgn0264874", "LINK")	The gene antisense RNA:CR44065 is referred to in FlyBase by the symbol Dmel\asRNA:CR44065 (CR44065, FBgn0264874). It is a non_protein_coding_gene from Dmel. It has one annotated transcript. Gene sequence location is 2L:2190191..2191272. Its molecular function is unknown. The biological processes in which it is involved are not known. No alleles are reported.
FBgn0264508	0.09	0.32	0.11	1.49	0.62	0.94	-2.60906	0.00692549	0.321296		lncRNA:CR43907	=HYPERLINK("http://flybase.org/reports/FBgn0264508", "LINK")	The gene long non-coding RNA:CR43907 is referred to in FlyBase by the symbol Dmel\lncRNA:CR43907 (CR43907, FBgn0264508). It is a non_protein_coding_gene from Dmel. It has one annotated transcript. Gene sequence location is 2R:11616195..11616694. Its molecular function is unknown. The biological processes in which it is involved are not known. No alleles are reported.
FBgn0267933	0.12	0.15	0.15	0.64	1.4	0.25	-2.49061	0.0499369	0.869258		lncRNA:CR46213	=HYPERLINK("http://flybase.org/reports/FBgn0267933", "LINK")	The gene long non-coding RNA:CR46213 is referred to in FlyBase by the symbol Dmel\lncRNA:CR46213 (CR46213, FBgn0267933). It is a non_protein_coding_gene from Dmel. It has one annotated transcript. Gene sequence location is 3L:15319923..15320356. Its molecular function is unknown. The biological processes in which it is involved are not known. No alleles are reported.
FBgn0266855	0.03	0.12	0.04	0.5	0.2	0.32	-2.43035	0.0144766	0.492268		lncRNA:CR45316	=HYPERLINK("http://flybase.org/reports/FBgn0266855", "LINK")	The gene long non-coding RNA:CR45316 is referred to in FlyBase by the symbol Dmel\lncRNA:CR45316 (CR45316, FBgn0266855). It is a non_protein_coding_gene from Dmel. It has one annotated transcript. Gene sequence location is 2R:16378815..16380135. Its molecular function is unknown. The biological processes in which it is involved are not known. No alleles are reported.
FBgn0267550	0.22	0.11	0.05	0.48	1.1	0.47	-2.37645	0.00420668	0.240185		asRNA:CR45890	=HYPERLINK("http://flybase.org/reports/FBgn0267550", "LINK")	The gene antisense RNA:CR45890 is referred to in FlyBase by the symbol Dmel\asRNA:CR45890 (CR45890, FBgn0267550). It is a non_protein_coding_gene from Dmel. It has one annotated transcript. Gene sequence location is 3L:16302544..16303531. Its molecular function is unknown. The biological processes in which it is involved are not known. No alleles are reported.
FBgn0003411	0.82	1.46	0.55	0	0	0.18	4.00307	0.000219545	0.0252167	UP	sisA	LINK	The gene sisterless A is referred to in FlyBase by the symbol Dmel\sisA (CG1641, FBgn0003411). It is a protein_coding_gene from Dmel. It has one annotated transcript and one polypeptide. Gene sequence location is X:11321579..11322357. Its molecular function is described by: protein binding; DNA-binding transcription factor activity; DNA-binding transcription factor activity, RNA polymerase II-spe…
FBgn0031554	0.16	0.2	0.3	0.89	0.68	1.5	-2.22013	0.00994578	0.40057		CG15418	=HYPERLINK("http://flybase.org/reports/FBgn0031554", "LINK")	This gene is referred to in FlyBase by the symbol Dmel\CG15418 (FBgn0031554). It is a protein_coding_gene from Dmel. It has 2 annotated transcripts and 2 polypeptides (1 unique). Gene sequence location is 2L:3621110..3621704. Its molecular function is described by: serine-type endopeptidase inhibitor activity. The biological processes in which it is involved are not known. 2 alleles are reported.…
FBgn0266086	0.07	0.45	0.09	0.65	0.95	1.09	-2.1776	0.0140165	0.480839		lncRNA:CR44828	=HYPERLINK("http://flybase.org/reports/FBgn0266086", "LINK")	The gene long non-coding RNA:CR44828 is referred to in FlyBase by the symbol Dmel\lncRNA:CR44828 (CR44828, FBgn0266086). It is a non_protein_coding_gene from Dmel. It has one annotated transcript. Gene sequence location is 2R:24738777..24739377. Its molecular function is unknown. The biological processes in which it is involved are not known. One allele is reported. No phenotypic data is availabl…
novel.199	2.75	1.31	2.51	0.25	0.17	0.08	3.69989	5.008e-07	0.000123282	UP	-	LINK
FBgn0266323	0.23	0.2	0.49	1.57	0.85	1.19	-1.99973	0.00808693	0.348327		lncRNA:CR44988	=HYPERLINK("http://flybase.org/reports/FBgn0266323", "LINK")	The gene long non-coding RNA:CR44988 is referred to in FlyBase by the symbol Dmel\lncRNA:CR44988 (CR44988, FBgn0266323). It is a non_protein_coding_gene from Dmel. It has one annotated transcript. Gene sequence location is 2L:710568..715307. Its molecular function is unknown. The biological processes in which it is involved are not known. One allele is reported. No phenotypic data is available. N…
novel.75	1.79	1.62	1.73	0.1	0.18	0.17	3.55451	4.7218e-36	1.83041e-32	UP	-	LINK
FBgn0264867	0.24	0.09	0.22	0.63	0.54	1.02	-1.99186	0.00252878	0.166541		lncRNA:CR44058	=HYPERLINK("http://flybase.org/reports/FBgn0264867", "LINK")	The gene long non-coding RNA:CR44058 is referred to in FlyBase by the symbol Dmel\lncRNA:CR44058 (CR44058, FBgn0264867). It is a non_protein_coding_gene from Dmel. It has 2 annotated transcripts. Gene sequence location is 2L:4241070..4242397. Its molecular function is unknown. The biological processes in which it is involved are not known. No alleles are reported.
FBgn0013709	1.29	7.38	0.81	17.82	10.96	7.81	-1.98674	0.0100478	0.403631		mt:tRNA:Trp-TCA	=HYPERLINK("http://flybase.org/reports/FBgn0013709", "LINK")	The gene mitochondrial transfer RNA:Tryptophan-TCA is referred to in FlyBase by the symbol Dmel\mt:tRNA:Trp-TCA (CR34064, FBgn0013709). It is a tRNA_gene from Dmel. It has one annotated transcript. Gene sequence location is mitochondrion_genome:1264..1329. Its molecular function is unknown. The biological processes in which it is involved are not known. No alleles are reported. Summary of modENCO…
novel.190	0.07	0.26	0.17	0.43	0.33	1.11	-1.95862	0.0492977	0.865291		-	=HYPERLINK("http://flybase.org/reports/novel.190", "LINK")
FBgn0036951	6.19	2.5	2.13	0.2	0.2	0.6	3.44676	5.98162e-13	4.63755e-10	UP	CG7017	LINK	This gene is referred to in FlyBase by the symbol Dmel\CG7017 (FBgn0036951). It is a protein_coding_gene from Dmel. It has 2 annotated transcripts and 2 polypeptides (1 unique). Gene sequence location is 3L:20210292..20212122. Its molecular function is described by: chitin binding. It is involved in the biological process described with: chitin metabolic process. 5 alleles are reported. No phenot…
FBgn0267021	1.79	2.58	1.17	0.11	0	0.51	3.16553	1.12377e-05	0.00189404	UP	lncRNA:CR45465	LINK	The gene long non-coding RNA:CR45465 is referred to in FlyBase by the symbol Dmel\lncRNA:CR45465 (CR45465, FBgn0267021). It is a non_protein_coding_gene from Dmel. It has 2 annotated transcripts. Gene sequence location is X:20238383..20239117. Its molecular function is unknown. The biological processes in which it is involved are not known. No alleles are reported.
FBgn0052706	2.93	5.46	5.89	0.49	0.65	0.7	2.95975	3.02687e-13	2.47024e-10	UP	CG32706	LINK	This gene is referred to in FlyBase by the symbol Dmel\CG32706 (FBgn0052706). It is a protein_coding_gene from Dmel. It has one annotated transcript and one polypeptide. Gene sequence location is X:9087129..9088073. Its molecular function is described by: RNA binding. It is involved in the biological process described with: small-subunit processome assembly; endonucleolytic cleavage to generate m…
FBgn0005391	0.34	0.2	0.33	0.41	0.64	2.29	-1.92253	0.00179177	0.132301		Yp2	=HYPERLINK("http://flybase.org/reports/FBgn0005391", "LINK")	The gene Yolk protein 2 is referred to in FlyBase by the symbol Dmel\Yp2 (CG2979, FBgn0005391). It is a protein_coding_gene from Dmel. It has 2 annotated transcripts and 2 polypeptides (1 unique). Gene sequence location is X:10050951..10052636. Its molecular function is described by: carboxylic ester hydrolase activity; lipase activity. It is involved in the biological process described with: lip…
FBgn0033096	1.12	1.68	1.62	0.21	0.12	0.25	2.89186	4.08777e-08	1.34862e-05	UP	Zip42C.1	LINK	The gene Zinc/iron regulated transporter-related protein 42C.1 is referred to in FlyBase by the symbol Dmel\Zip42C.1 (CG9428, FBgn0033096). It is a protein_coding_gene from Dmel. It has one annotated transcript and one polypeptide. Gene sequence location is 2R:6716342..6717707. Its molecular function is described by: zinc ion transmembrane transporter activity. It is involved in the biological pr…
FBgn0053963	0.11	0	0.23	0.3	0.49	0.44	-1.85299	0.0389942	0.791057		lncRNA:CR33963	=HYPERLINK("http://flybase.org/reports/FBgn0053963", "LINK")	The gene long non-coding RNA:CR33963 is referred to in FlyBase by the symbol Dmel\lncRNA:CR33963 (CR33963, FBgn0053963).The gene has a gene model, but the supporting evidence is inconclusive. It is a non_protein_coding_gene from Dmel. It has one annotated transcript. Gene sequence location is X:12659462..12660632. Its molecular function is described by: . It is involved in the biological process …
FBgn0267296	0.07	0.09	0.13	0.43	0.35	0.27	-1.84259	0.0399245	0.796156		lncRNA:CR45732	=HYPERLINK("http://flybase.org/reports/FBgn0267296", "LINK")	The gene long non-coding RNA:CR45732 is referred to in FlyBase by the symbol Dmel\lncRNA:CR45732 (CR45732, FBgn0267296). It is a non_protein_coding_gene from Dmel. It has one annotated transcript. Gene sequence location is 3L:19439927..19441195. Its molecular function is unknown. The biological processes in which it is involved are not known. No alleles are reported.
novel.106	0.09	0.29	0.11	0.46	0.61	0.65	-1.82051	0.0243387	0.650682		-	=HYPERLINK("http://flybase.org/reports/novel.106", "LINK")
FBgn0262484	0.5	0.72	0.55	0.35	0.61	5.26	-1.80694	0.0217878	0.61815		CG43074	=HYPERLINK("http://flybase.org/reports/FBgn0262484", "LINK")	This gene is referred to in FlyBase by the symbol Dmel\CG43074 (FBgn0262484). It is a protein_coding_gene from Dmel. It has one annotated transcript and one polypeptide. Gene sequence location is 3L:3483832..3484653. Its molecular function is unknown. The biological processes in which it is involved are not known. No alleles are reported.
FBgn0030395	1.82	1.35	0.75	0.16	0.14	0.26	2.8253	1.85218e-09	8.20566e-07	UP	Mks1	LINK	The gene Meckel syndrome, type 1 is referred to in FlyBase by the symbol Dmel\Mks1 (CG15730, FBgn0030395). It is a protein_coding_gene from Dmel. It has one annotated transcript and one polypeptide. Gene sequence location is X:12494395..12496597. Its molecular function is unknown. It is involved in the biological process described with: non-motile cilium assembly; axoneme assembly; ciliary transi…
FBgn0010388	25.4	31.92	18.6	23.97	106.33	132.56	-1.78854	0.0104319	0.415827		Dro	=HYPERLINK("http://flybase.org/reports/FBgn0010388", "LINK")	The gene Drosocin is referred to in FlyBase by the symbol Dmel\Dro (CG10816, FBgn0010388). It is a protein_coding_gene from Dmel. It has 2 annotated transcripts and 2 polypeptides (1 unique). Gene sequence location is 2R:14745961..14746714. Its molecular function is unknown. It is involved in the biological process described with 8 unique terms, many of which group under: response to bacterium; r…
FBgn0053092	0.07	0.07	0.04	0.08	0.15	0.38	-1.74765	0.0483579	0.861883		P5CDh2	=HYPERLINK("http://flybase.org/reports/FBgn0053092", "LINK")	The gene delta-1-Pyrroline-5-carboxylate dehydrogenase 2 is referred to in FlyBase by the symbol Dmel\P5CDh2 (CG33092, FBgn0053092). It is a protein_coding_gene from Dmel. It has 6 annotated transcripts and 6 polypeptides (3 unique). Gene sequence location is 3R:21877936..21880696. Its molecular function is described by: 1-pyrroline-5-carboxylate dehydrogenase activity; oxidoreductase activity, a…
FBgn0026397	1.44	0.63	1.32	0.21	0.08	0.18	2.82027	4.16743e-06	0.000788051	UP	Or22b	LINK	The gene Odorant receptor 22b is referred to in FlyBase by the symbol Dmel\Or22b (CG4231, FBgn0026397). It is a protein_coding_gene from Dmel. It has one annotated transcript and one polypeptide. Gene sequence location is 2L:1522697..1524257. Its molecular function is described by: olfactory receptor activity; odorant binding; transmembrane signaling receptor activity. It is involved in the biolo…
FBgn0262363	144.35	145.5	132.42	19.78	20.27	19.94	2.81839	6.28107e-77	9.73942e-73	UP	CG43061	LINK	This gene is referred to in FlyBase by the symbol Dmel\CG43061 (FBgn0262363). It is a protein_coding_gene from Dmel. It has one annotated transcript and one polypeptide. Gene sequence location is 3R:8049673..8050059. Its molecular function is described by: . It is involved in the biological process described with: pathogenesis. No alleles are reported.
FBgn0266680	0.31	0.6	0.92	2.42	2.23	1.21	-1.69617	0.000993297	0.0828068		lncRNA:CR45170	=HYPERLINK("http://flybase.org/reports/FBgn0266680", "LINK")	The gene long non-coding RNA:CR45170 is referred to in FlyBase by the symbol Dmel\lncRNA:CR45170 (CR45170, FBgn0266680). It is a non_protein_coding_gene from Dmel. It has one annotated transcript. Gene sequence location is 3L:2517161..2518402. Its molecular function is unknown. The biological processes in which it is involved are not known. No alleles are reported.
FBgn0004589	0.36	0.46	0.45	1.49	1.1	1.49	-1.69251	0.0166147	0.528772		Eig71Eb	=HYPERLINK("http://flybase.org/reports/FBgn0004589", "LINK")	The gene Ecdysone-induced gene 71Eb is referred to in FlyBase by the symbol Dmel\Eig71Eb (CG7355, FBgn0004589). It is a protein_coding_gene from Dmel. It has 2 annotated transcripts and 2 polypeptides (1 unique). Gene sequence location is 3L:15649936..15650541. Its molecular function is unknown. It is involved in the biological process described with: defense response to bacterium. 4 alleles are …
FBgn0267128	0.87	0.52	0.66	2.46	2.19	1.73	-1.62522	0.000546562	0.0526397		lncRNA:CR45568	=HYPERLINK("http://flybase.org/reports/FBgn0267128", "LINK")	The gene long non-coding RNA:CR45568 is referred to in FlyBase by the symbol Dmel\lncRNA:CR45568 (CR45568, FBgn0267128). It is a non_protein_coding_gene from Dmel. It has one annotated transcript. Gene sequence location is 3R:29276376..29277108. Its molecular function is unknown. The biological processes in which it is involved are not known. No alleles are reported.
FBgn0266868	0.21	0.13	0.33	0.91	0.25	0.86	-1.61318	0.0457543	0.841804		lncRNA:CR45329	=HYPERLINK("http://flybase.org/reports/FBgn0266868", "LINK")	The gene long non-coding RNA:CR45329 is referred to in FlyBase by the symbol Dmel\lncRNA:CR45329 (CR45329, FBgn0266868). It is a non_protein_coding_gene from Dmel. It has one annotated transcript. Gene sequence location is 2R:14823545..14824365. Its molecular function is unknown. The biological processes in which it is involved are not known. No alleles are reported.
FBgn0040801	0.41	0.44	0.6	1.26	1.17	1.89	-1.57905	0.00887726	0.369737		CG13053	=HYPERLINK("http://flybase.org/reports/FBgn0040801", "LINK")	This gene is referred to in FlyBase by the symbol Dmel\CG13053 (FBgn0040801). It is a protein_coding_gene from Dmel. It has 2 annotated transcripts and 2 polypeptides (1 unique). Gene sequence location is 3L:16259037..16259722. Its molecular function is unknown. The biological processes in which it is involved are not known. 2 alleles are reported. No phenotypic data is available. The phenotypic …
FBgn0264711	1.63	1.05	2.12	0.24	0.16	0.32	2.7366	3.89105e-18	5.02789e-15	UP	CG43980	LINK	This gene is referred to in FlyBase by the symbol Dmel\CG43980 (FBgn0264711). It is a protein_coding_gene from Dmel. It has 2 annotated transcripts and 2 polypeptides (all unique). Gene sequence location is 3L:21644958..21666306. Its molecular function is described by: protein heterodimerization activity. The biological processes in which it is involved are not known. 11 alleles are reported. The…
novel.114	0.42	0.4	0.4	1.16	1.15	1.27	-1.55302	0.0481587	0.859497		-	=HYPERLINK("http://flybase.org/reports/novel.114", "LINK")
FBgn0052581	6.23	13.11	13.57	1.73	1.81	1.67	2.65892	1.20801e-20	2.34142e-17	UP	CG32581	LINK	This gene is referred to in FlyBase by the symbol Dmel\CG32581 (FBgn0052581). It is a protein_coding_gene from Dmel. It has 2 annotated transcripts and 2 polypeptides (1 unique). Gene sequence location is X:15796908..15799162. Its molecular function is described by: ubiquitin-like protein conjugating enzyme binding; ubiquitin-protein transferase activity; ubiquitin protein ligase activity; zinc i…
FBgn0014465	1.12	0.65	1.23	0.17	0.22	0.11	2.58576	1.59885e-07	4.76764e-05	UP	Cp7Fb	LINK	The gene Chorion protein b at 7F is referred to in FlyBase by the symbol Dmel\Cp7Fb (CG15350, FBgn0014465). It is a protein_coding_gene from Dmel. It has 2 annotated transcripts and 2 polypeptides (all unique). Gene sequence location is X:8473837..8476071. Its molecular function is unknown. It is involved in the biological process described with: chorion-containing eggshell formation. 10 alleles …
FBgn0052713	27.32	25.21	21.92	4.48	5.19	3.12	2.54564	6.42628e-33	1.99292e-29	UP	CG32713	LINK	This gene is referred to in FlyBase by the symbol Dmel\CG32713 (FBgn0052713). It is a protein_coding_gene from Dmel. It has 2 annotated transcripts and 2 polypeptides (1 unique). Gene sequence location is X:8456837..8457632. Its molecular function is described by: . It is involved in the biological process described with: . 3 alleles are reported. No phenotypic data is available. No phenotypic cl…
novel.173	0.42	0.75	0.95	2.32	1.42	1.84	-1.42976	0.0140845	0.482106		-	=HYPERLINK("http://flybase.org/reports/novel.173", "LINK")
FBgn0267138	0.36	1.27	0.36	0.79	2.6	1.88	-1.41466	0.029625	0.70347		lncRNA:CR45578	=HYPERLINK("http://flybase.org/reports/FBgn0267138", "LINK")	The gene long non-coding RNA:CR45578 is referred to in FlyBase by the symbol Dmel\lncRNA:CR45578 (CR45578, FBgn0267138). It is a non_protein_coding_gene from Dmel. It has one annotated transcript. Gene sequence location is 3R:10897985..10898581. Its molecular function is unknown. The biological processes in which it is involved are not known. No alleles are reported.
FBgn0030826	0.41	0.43	0.34	1.37	1.23	0.52	-1.4105	0.0436567	0.826545		CG12995	=HYPERLINK("http://flybase.org/reports/FBgn0030826", "LINK")	This gene is referred to in FlyBase by the symbol Dmel\CG12995 (FBgn0030826). It is a protein_coding_gene from Dmel. It has one annotated transcript and one polypeptide. Gene sequence location is X:17209368..17209997. Its molecular function is unknown. The biological processes in which it is involved are not known. 3 alleles are reported. No phenotypic data is available. The phenotypic classes of…
FBgn0264541	1.46	2.78	3.01	1.25	10.36	7.56	-1.40189	0.0128071	0.457574		CG43920	=HYPERLINK("http://flybase.org/reports/FBgn0264541", "LINK")	This gene is referred to in FlyBase by the symbol Dmel\CG43920 (FBgn0264541). It is a protein_coding_gene from Dmel. It has 2 annotated transcripts and 2 polypeptides (1 unique). Gene sequence location is 2R:17598845..17599253. Its molecular function is described by: . It is involved in the biological process described with: . No alleles are reported.
FBgn0031277	142.55	185.12	179.4	131.16	542.26	667.49	-1.39987	0.0309519	0.717675		CG13947	=HYPERLINK("http://flybase.org/reports/FBgn0031277", "LINK")	This gene is referred to in FlyBase by the symbol Dmel\CG13947 (FBgn0031277). It is a protein_coding_gene from Dmel. It has one annotated transcript and one polypeptide. Gene sequence location is 2L:779173..779655. Its molecular function is unknown. The biological processes in which it is involved are not known. One allele is reported. No phenotypic data is available. The phenotypic class of alle…
novel.178	0.57	0.96	0.59	1.56	2.29	1.66	-1.38412	0.0220976	0.619975		-	=HYPERLINK("http://flybase.org/reports/novel.178", "LINK")
FBgn0030105	1.18	2.89	2.67	0.36	0.29	0.52	2.51906	7.15594e-05	0.0096487	UP	CG15369	LINK	This gene is referred to in FlyBase by the symbol Dmel\CG15369 (FBgn0030105). It is a protein_coding_gene from Dmel. It has 2 annotated transcripts and 2 polypeptides (1 unique). Gene sequence location is X:9216872..9217466. Its molecular function is described by: cysteine-type endopeptidase inhibitor activity. The biological processes in which it is involved are not known. 4 alleles are reported…
FBgn0267603	0.7	0.07	0.37	0.86	0.85	1.35	-1.38065	0.0481532	0.859497		lncRNA:CR45941	=HYPERLINK("http://flybase.org/reports/FBgn0267603", "LINK")	The gene long non-coding RNA:CR45941 is referred to in FlyBase by the symbol Dmel\lncRNA:CR45941 (CR45941, FBgn0267603). It is a non_protein_coding_gene from Dmel. It has one annotated transcript. Gene sequence location is 3L:19183998..19184726. Its molecular function is unknown. The biological processes in which it is involved are not known. No alleles are reported.
FBgn0267635	0.75	0.56	0.57	0.12	0.14	0.07	2.51152	1.01032e-07	3.13321e-05	UP	lncRNA:CR45973	LINK	The gene long non-coding RNA:CR45973 is referred to in FlyBase by the symbol Dmel\lncRNA:CR45973 (CR45973, FBgn0267635). It is a non_protein_coding_gene from Dmel. It has 2 annotated transcripts. Gene sequence location is 3L:20404270..20407558. Its molecular function is unknown. The biological processes in which it is involved are not known. One allele is reported. No phenotypic data is available…
novel.7	0.47	0.15	0.27	0.82	0.63	0.85	-1.35339	0.00696218	0.321296		-	=HYPERLINK("http://flybase.org/reports/novel.7", "LINK")
FBgn0261291	0.77	0.65	0.52	1.85	1.44	1.7	-1.35117	0.00398695	0.231542		CheA86a	=HYPERLINK("http://flybase.org/reports/FBgn0261291", "LINK")	The gene Chemosensory protein A 86a is referred to in FlyBase by the symbol Dmel\CheA86a (CG33698, FBgn0261291). It is a protein_coding_gene from Dmel. It has one annotated transcript and one polypeptide. Gene sequence location is 3R:11144346..11145235. Its molecular function is described by: . It is involved in the biological process described with: sensory perception of chemical stimulus. 3 all…
FBgn0033789	25.57	22.55	27.13	3.99	6.07	4.13	2.42078	3.12561e-26	6.92366e-23	UP	CG13324	LINK	This gene is referred to in FlyBase by the symbol Dmel\CG13324 (FBgn0033789). It is a protein_coding_gene from Dmel. It has one annotated transcript and one polypeptide. Gene sequence location is 2R:13049146..13049656. Its molecular function is unknown. The biological processes in which it is involved are not known. One allele is reported. No phenotypic data is available. The phenotypic class of …
FBgn0266070	3.73	1.68	1.06	5.2	5.11	6.35	-1.33491	0.00335696	0.203332		lncRNA:CR44823	=HYPERLINK("http://flybase.org/reports/FBgn0266070", "LINK")	The gene long non-coding RNA:CR44823 is referred to in FlyBase by the symbol Dmel\lncRNA:CR44823 (CR44823, FBgn0266070). It is a non_protein_coding_gene from Dmel. It has one annotated transcript. Gene sequence location is 2L:6231807..6232160. Its molecular function is unknown. The biological processes in which it is involved are not known. No alleles are reported.
FBgn0267047	0.28	1.24	2.11	2.19	0.76	6.08	-1.32802	0.0481686	0.859497		CG45491	=HYPERLINK("http://flybase.org/reports/FBgn0267047", "LINK")	This gene is referred to in FlyBase by the symbol Dmel\CG45491 (FBgn0267047). It is a protein_coding_gene from Dmel. It has one annotated transcript and one polypeptide. Gene sequence location is X:19938232..19938994. Its molecular function is described by: . It is involved in the biological process described with: . No alleles are reported.
FBgn0267656	2.04	2.93	2.82	0.3	0.72	0.58	2.30787	5.81732e-06	0.00106122	UP	lncRNA:CR45994	LINK	The gene long non-coding RNA:CR45994 is referred to in FlyBase by the symbol Dmel\lncRNA:CR45994 (CR45994, FBgn0267656). It is a non_protein_coding_gene from Dmel. It has one annotated transcript. Gene sequence location is 2R:16153906..16154551. Its molecular function is unknown. The biological processes in which it is involved are not known. No alleles are reported.
FBgn0042173	0.4	0.23	0.65	1.08	1.21	0.89	-1.30581	0.0108691	0.421945		CG18853	=HYPERLINK("http://flybase.org/reports/FBgn0042173", "LINK")	This gene is referred to in FlyBase by the symbol Dmel\CG18853 (FBgn0042173).The gene has a gene model, but the supporting evidence is inconclusive. It is a protein_coding_gene from Dmel. It has one annotated transcript and one polypeptide. Gene sequence location is 2R:7829062..7830429. Its molecular function is described by: tRNA (adenine-N6-)-methyltransferase activity. The biological processes…
FBgn0004045	0.24	0.37	0.4	0.27	0.51	1.69	-1.29653	0.0405663	0.8013		Yp1	=HYPERLINK("http://flybase.org/reports/FBgn0004045", "LINK")	The gene Yolk protein 1 is referred to in FlyBase by the symbol Dmel\Yp1 (CG2985, FBgn0004045). It is a protein_coding_gene from Dmel. It has 2 annotated transcripts and 2 polypeptides (1 unique). Gene sequence location is X:10053811..10055498. Its molecular function is described by: carboxylic ester hydrolase activity; lipase activity. It is involved in the biological process described with: sex…
FBgn0085411	0.12	0.07	0.1	0.22	0.32	0.2	-1.27252	0.0416706	0.813234		CG34382	=HYPERLINK("http://flybase.org/reports/FBgn0085411", "LINK")	This gene is referred to in FlyBase by the symbol Dmel\CG34382 (FBgn0085411). It is a protein_coding_gene from Dmel. It has 4 annotated transcripts and 4 polypeptides (2 unique). Gene sequence location is 3L:9878985..9884493. Its molecular function is described by: . It is involved in the biological process described with: . 4 alleles are reported. No phenotypic data is available. The phenotypic …
FBgn0027259	13.38	5.51	4.06	1.96	1.44	1.36	2.27022	4.42888e-09	1.80722e-06	UP	Kmn1	LINK	The gene kinetochore Mis12-Ndc80 network component 1 is referred to in FlyBase by the symbol Dmel\Kmn1 (CG1558, FBgn0027259). It is a protein_coding_gene from Dmel. It has 2 annotated transcripts and 2 polypeptides (1 unique). Gene sequence location is X:11571383..11572442. Its molecular function is unknown. It is involved in the biological process described with: chromosome segregation; mitotic …
FBgn0029161	0.31	0.32	0.37	0.66	0.54	1.18	-1.25525	0.00529087	0.274382		slmo	=HYPERLINK("http://flybase.org/reports/FBgn0029161", "LINK")	The gene slowmo is referred to in FlyBase by the symbol Dmel\slmo (CG9131, FBgn0029161). It is a protein_coding_gene from Dmel. It has 5 annotated transcripts and 5 polypeptides (1 unique). Gene sequence location is 2L:6046516..6048706. Its molecular function is described by: phosphatidic acid transfer activity. It is involved in the biological process described with: larval locomotory behavior; …
FBgn0265529	1.18	0.92	1.71	2.59	3.08	3.39	-1.24833	0.00699773	0.321979		lncRNA:CR44379	=HYPERLINK("http://flybase.org/reports/FBgn0265529", "LINK")	The gene long non-coding RNA:CR44379 is referred to in FlyBase by the symbol Dmel\lncRNA:CR44379 (CR44379, FBgn0265529). It is a non_protein_coding_gene from Dmel. It has 2 annotated transcripts. Gene sequence location is 2R:16812245..16812791. Its molecular function is unknown. The biological processes in which it is involved are not known. No alleles are reported.
FBgn0266257	1.56	0.94	0.93	2.19	3.16	2.78	-1.21595	0.00669578	0.318481		lncRNA:CR44952	=HYPERLINK("http://flybase.org/reports/FBgn0266257", "LINK")	The gene long non-coding RNA:CR44952 is referred to in FlyBase by the symbol Dmel\lncRNA:CR44952 (CR44952, FBgn0266257). It is a non_protein_coding_gene from Dmel. It has one annotated transcript. Gene sequence location is 3R:28777212..28777850. Its molecular function is unknown. The biological processes in which it is involved are not known. No alleles are reported.
FBgn0030583	1.47	3.3	3.09	0.71	0.6	0.39	2.19784	4.36649e-05	0.00621164	UP	CG14410	LINK	This gene is referred to in FlyBase by the symbol Dmel\CG14410 (FBgn0030583). It is a protein_coding_gene from Dmel. It has one annotated transcript and one polypeptide. Gene sequence location is X:14836725..14837330. Its molecular function is unknown. The biological processes in which it is involved are not known. 4 alleles are reported. The phenotype of these alleles manifest in: trichogen cell…
FBgn0263999	0.25	0.14	0.25	0.55	0.45	0.5	-1.1964	0.0494782	0.866631		CG43742	=HYPERLINK("http://flybase.org/reports/FBgn0263999", "LINK")	This gene is referred to in FlyBase by the symbol Dmel\CG43742 (FBgn0263999). It is a protein_coding_gene from Dmel. It has one annotated transcript and one polypeptide. Gene sequence location is 2R:21935002..21936863. Its molecular function is described by: serine-type endopeptidase activity. It is involved in the biological process described with: proteolysis. One allele is reported. No phenoty…
FBgn0267643	6.93	5.71	4.12	1.29	1.31	1.19	2.15206	7.66375e-12	5.1667e-09	UP	lncRNA:CR45981	LINK	The gene long non-coding RNA:CR45981 is referred to in FlyBase by the symbol Dmel\lncRNA:CR45981 (CR45981, FBgn0267643). It is a non_protein_coding_gene from Dmel. It has one annotated transcript. Gene sequence location is 3L:2621721..2622629. Its molecular function is unknown. The biological processes in which it is involved are not known. No alleles are reported.
novel.53	9.27	9.83	10.16	3.32	1.77	1.98	2.03611	3.43855e-16	3.55454e-13	UP	-	LINK
FBgn0265592	5.24	3.24	3.83	1.37	0.77	0.94	1.98729	1.56982e-06	0.000347738	UP	lncRNA:CR44419	LINK	The gene long non-coding RNA:CR44419 is referred to in FlyBase by the symbol Dmel\lncRNA:CR44419 (CR44419, FBgn0265592). It is a non_protein_coding_gene from Dmel. It has one annotated transcript. Gene sequence location is 2R:18005395..18005995. Its molecular function is unknown. The biological processes in which it is involved are not known. No alleles are reported.
FBgn0038083	3.7	5.65	6.04	6	10.45	18.16	-1.16694	0.0188975	0.576819		CG5999	=HYPERLINK("http://flybase.org/reports/FBgn0038083", "LINK")	The gene UDP-glycosyltransferase family 37 member A3 is referred to in FlyBase by the symbol Dmel\Ugt37A3 (CG5999, FBgn0038083). It is a protein_coding_gene from Dmel. It has one annotated transcript and one polypeptide. Gene sequence location is 3R:12741958..12743680. Its molecular function is described by: transferase activity, transferring hexosyl groups. The biological processes in which it i…
FBgn0004649	0.21	0.09	0.13	0.25	0.4	0.31	-1.1602	0.00611966	0.304139		yl	=HYPERLINK("http://flybase.org/reports/FBgn0004649", "LINK")	The gene yolkless is referred to in FlyBase by the symbol Dmel\yl (CG1372, FBgn0004649). It is a protein_coding_gene from Dmel. It has 2 annotated transcripts and 2 polypeptides (all unique). Gene sequence location is X:14193214..14199958. Its molecular function is described by: calcium ion binding; vitellogenin receptor activity. It is involved in the biological process described with: oogenesis…
FBgn0052641	31.41	32.85	28.6	9.59	6.1	8.04	1.96067	1.52957e-20	2.63527e-17	UP	CG32641	LINK	This gene is referred to in FlyBase by the symbol Dmel\CG32641 (FBgn0052641). It is a protein_coding_gene from Dmel. It has one annotated transcript and one polypeptide. Gene sequence location is X:13184478..13184996. Its molecular function is unknown. The biological processes in which it is involved are not known. One allele is reported. No phenotypic data is available. No phenotypic class data …
FBgn0034318	37.46	71.27	53.36	7.06	17.03	18	1.95011	4.63415e-05	0.00653247	UP	CG14500	LINK	This gene is referred to in FlyBase by the symbol Dmel\CG14500 (FBgn0034318). It is a protein_coding_gene from Dmel. It has one annotated transcript and one polypeptide. Gene sequence location is 2R:18188978..18189654. Its molecular function is described by: carbohydrate binding. The biological processes in which it is involved are not known. 2 alleles are reported. No phenotypic data is availabl…
FBgn0034965	0.38	0.4	0.42	0.91	0.73	1.01	-1.13638	0.00768192	0.341436		ppk29	=HYPERLINK("http://flybase.org/reports/FBgn0034965", "LINK")	The gene pickpocket 29 is referred to in FlyBase by the symbol Dmel\ppk29 (CG13568, FBgn0034965). It is a protein_coding_gene from Dmel. It has 5 annotated transcripts and 5 polypeptides (3 unique). Gene sequence location is 2R:24052917..24057137. Its molecular function is described by: sodium channel activity; ligand-gated sodium channel activity. It is involved in the biological process describ…
FBgn0050025	1.1	2.2	1.06	2.57	3.45	3.47	-1.1233	0.00303574	0.190441		CG30025	=HYPERLINK("http://flybase.org/reports/FBgn0050025", "LINK")	This gene is referred to in FlyBase by the symbol Dmel\CG30025 (FBgn0050025). It is a protein_coding_gene from Dmel. It has one annotated transcript and one polypeptide. Gene sequence location is 2R:11353564..11354373. Its molecular function is described by: serine-type endopeptidase activity. It is involved in the biological process described with: proteolysis. One allele is reported. No phenoty…
FBgn0264569	1.32	0.76	1.03	2.17	2.41	2.25	-1.11989	0.000569407	0.0535104		lncRNA:CR43941	=HYPERLINK("http://flybase.org/reports/FBgn0264569", "LINK")	The gene long non-coding RNA:CR43941 is referred to in FlyBase by the symbol Dmel\lncRNA:CR43941 (CR43941, FBgn0264569). It is a non_protein_coding_gene from Dmel. It has one annotated transcript. Gene sequence location is 3L:23881735..23883142. Its molecular function is unknown. The biological processes in which it is involved are not known. No alleles are reported.
FBgn0266206	0.69	0.26	0.7	1.18	1.39	0.99	-1.09055	0.0199266	0.591256		lncRNA:CR44901	=HYPERLINK("http://flybase.org/reports/FBgn0266206", "LINK")	The gene long non-coding RNA:CR44901 is referred to in FlyBase by the symbol Dmel\lncRNA:CR44901 (CR44901, FBgn0266206). It is a non_protein_coding_gene from Dmel. It has one annotated transcript. Gene sequence location is 2L:18261073..18262298. Its molecular function is unknown. The biological processes in which it is involved are not known. No alleles are reported.
FBgn0286030	5.88	7.64	5.84	2.65	0.79	1.51	1.93972	1.58445e-07	4.76764e-05	UP	lncRNA:CR46350	LINK	The gene long non-coding RNA:CR46350 is referred to in FlyBase by the symbol Dmel\lncRNA:CR46350 (CR46350, FBgn0286030). It is a non_protein_coding_gene from Dmel. It has one annotated transcript. Gene sequence location is 3R:9283875..9284525. Its molecular function is unknown. The biological processes in which it is involved are not known. One allele is reported. No phenotypic data is available.…
FBgn0266980	1.2	0.92	1.41	1.92	3.32	2.3	-1.07958	0.0222834	0.622571		lncRNA:CR45431	=HYPERLINK("http://flybase.org/reports/FBgn0266980", "LINK")	The gene long non-coding RNA:CR45431 is referred to in FlyBase by the symbol Dmel\lncRNA:CR45431 (CR45431, FBgn0266980). It is a non_protein_coding_gene from Dmel. It has one annotated transcript. Gene sequence location is 3L:22498310..22498839. Its molecular function is unknown. The biological processes in which it is involved are not known. No alleles are reported.
FBgn0036836	6.51	3.67	5.38	1.23	1.15	1.74	1.91764	8.39807e-14	7.23447e-11	UP	CG11619	LINK	This gene is referred to in FlyBase by the symbol Dmel\CG11619 (FBgn0036836). It is a protein_coding_gene from Dmel. It has one annotated transcript and one polypeptide. Gene sequence location is 3L:18985905..18988323. Its molecular function is described by: starch binding; glycerophosphocholine phosphodiesterase activity. It is involved in the biological process described with: glycerophospholip…
FBgn0052823	0.9	0.44	0.84	0.12	0.33	0.18	1.83852	0.000290847	0.0322134	UP	Sdic3	LINK	The gene Sperm-specific dynein intermediate chain 3 is referred to in FlyBase by the symbol Dmel\Sdic3 (CG32823, FBgn0052823). It is a protein_coding_gene from Dmel. It has 3 annotated transcripts and 3 polypeptides (1 unique). Gene sequence location is X:20189440..20194227. Its molecular function is described by: . It is involved in the biological process described with: microtubule-based moveme…
FBgn0037422	0.31	0.29	0.53	0.8	0.65	0.9	-1.0704	0.0296125	0.70347		Osi13	=HYPERLINK("http://flybase.org/reports/FBgn0037422", "LINK")	The gene Osiris 13 is referred to in FlyBase by the symbol Dmel\Osi13 (CG15595, FBgn0037422). It is a protein_coding_gene from Dmel. It has one annotated transcript and one polypeptide. Gene sequence location is 3R:6291737..6293489. Its molecular function is described by: . It is involved in the biological process described with: . 3 alleles are reported. No phenotypic data is available. The phen…
novel.134	3.35	2.47	2.41	0.84	1.14	0.58	1.69475	9.95642e-10	4.98014e-07	UP	-	LINK
FBgn0004780	1.45	0.74	0.8	2.67	1.55	1.91	-1.02498	0.0262208	0.674024		Ccp84Ad	=HYPERLINK("http://flybase.org/reports/FBgn0004780", "LINK")	The gene Ccp84Ad is referred to in FlyBase by the symbol Dmel\Ccp84Ad (CG2341, FBgn0004780). It is a protein_coding_gene from Dmel. It has one annotated transcript and one polypeptide. Gene sequence location is 3R:6692732..6693527. Its molecular function is described by: structural constituent of chitin-based larval cuticle; structural constituent of cuticle. It is involved in the biological proc…
FBgn0034329	250.14	226.25	184.28	73.41	85.05	53.22	1.64485	2.62053e-18	3.69399e-15	UP	IM1	LINK	The gene Bomanin Short 1 is referred to in FlyBase by the symbol Dmel\BomS1 (CG18108, FBgn0034329). It is a protein_coding_gene from Dmel. It has one annotated transcript and one polypeptide. Gene sequence location is 2R:18383949..18384378. Its molecular function is unknown. It is involved in the biological process described with: response to bacterium; defense response. 3 alleles are reported. T…
FBgn0036607	1.49	1.51	1.5	2.81	2.44	3.77	-1.00277	0.0135212	0.471744		CG13059	=HYPERLINK("http://flybase.org/reports/FBgn0036607", "LINK")	This gene is referred to in FlyBase by the symbol Dmel\CG13059 (FBgn0036607). It is a protein_coding_gene from Dmel. It has one annotated transcript and one polypeptide. Gene sequence location is 3L:16323672..16324308. Its molecular function is unknown. The biological processes in which it is involved are not known. One allele is reported. No phenotypic data is available. The phenotypic class of …
FBgn0036597	6.16	6.92	2.77	2.38	1.34	1.39	1.62429	2.30843e-05	0.00354401	UP	CG4962	LINK	This gene is referred to in FlyBase by the symbol Dmel\CG4962 (FBgn0036597). It is a protein_coding_gene from Dmel. It has one annotated transcript and one polypeptide. Gene sequence location is 3L:16294711..16295547. Its molecular function is unknown. The biological processes in which it is involved are not known. 3 alleles are reported. No phenotypic data is available. The phenotypic class of a…
FBgn0035741	0.51	0.39	0.47	1.06	0.82	0.86	-0.997914	0.0093788	0.385815		BBS1	=HYPERLINK("http://flybase.org/reports/FBgn0035741", "LINK")	The gene Bardet-Biedl syndrome 1 is referred to in FlyBase by the symbol Dmel\BBS1 (CG14825, FBgn0035741). It is a protein_coding_gene from Dmel. It has one annotated transcript and one polypeptide. Gene sequence location is 3L:7125905..7128118. Its molecular function is described by: patched binding; smoothened binding. It is involved in the biological process described with: protein localizatio…
FBgn0034328	25.64	19.88	15.21	5.53	3.64	11.41	1.56339	3.1253e-06	0.000621294	UP	IM23	LINK	The gene Bomanin Bicipital 1 is referred to in FlyBase by the symbol Dmel\BomBc1 (CG15066, FBgn0034328). It is a protein_coding_gene from Dmel. It has one annotated transcript and one polypeptide. Gene sequence location is 2R:18382704..18383235. Its molecular function is described by: . It is involved in the biological process described with: defense response to Gram-positive bacterium; response …
FBgn0264842	0.74	1.03	0.79	1.56	1.3	2.19	-0.988078	0.0125739	0.455802		lncRNA:CR44050	=HYPERLINK("http://flybase.org/reports/FBgn0264842", "LINK")	The gene long non-coding RNA:CR44050 is referred to in FlyBase by the symbol Dmel\lncRNA:CR44050 (CR44050, FBgn0264842). It is a non_protein_coding_gene from Dmel. It has one annotated transcript. Gene sequence location is 3L:15884593..15885747. Its molecular function is unknown. The biological processes in which it is involved are not known. No alleles are reported.
novel.64	2.31	2.55	2.52	5.26	4.12	5.09	-0.976011	0.028094	0.69734		-	=HYPERLINK("http://flybase.org/reports/novel.64", "LINK")
FBgn0013308	2.21	1.32	1.18	4.24	2.94	2.14	-0.972408	0.00483691	0.258443		Odc2	=HYPERLINK("http://flybase.org/reports/FBgn0013308", "LINK")	The gene Ornithine decarboxylase 2 is referred to in FlyBase by the symbol Dmel\Odc2 (CG8719, FBgn0013308). It is a protein_coding_gene from Dmel. It has one annotated transcript and one polypeptide. Gene sequence location is 2R:8007246..8009062. Its molecular function is described by: ornithine decarboxylase activity. It is involved in the biological process described with: putrescine biosynthet…
FBgn0085209	3.28	5.9	3.42	10.43	5.91	8.1	-0.968269	0.00633224	0.30947		CG34180	=HYPERLINK("http://flybase.org/reports/FBgn0085209", "LINK")	This gene is referred to in FlyBase by the symbol Dmel\CG34180 (FBgn0085209). It is a protein_coding_gene from Dmel. It has one annotated transcript and one polypeptide. Gene sequence location is 2L:6060510..6060938. Its molecular function is described by: . It is involved in the biological process described with: . One allele is reported. No phenotypic data is available. No phenotypic class data…
novel.187	0.78	0.79	0.78	1.71	1	1.87	-0.96638	0.0249101	0.659537		-	=HYPERLINK("http://flybase.org/reports/novel.187", "LINK")
FBgn0265813	0.37	0.46	0.52	0.65	1.12	0.84	-0.947125	0.00689149	0.321296		lncRNA:CR44602	=HYPERLINK("http://flybase.org/reports/FBgn0265813", "LINK")	The gene long non-coding RNA:CR44602 is referred to in FlyBase by the symbol Dmel\lncRNA:CR44602 (CR44602, FBgn0265813). It is a non_protein_coding_gene from Dmel. It has 2 annotated transcripts. Gene sequence location is 2L:15807181..15810319. Its molecular function is unknown. The biological processes in which it is involved are not known. No alleles are reported.
FBgn0036109	1.36	0.96	1.61	3.33	1.65	2.49	-0.934794	0.0434598	0.826545		Cpr67Fa2	=HYPERLINK("http://flybase.org/reports/FBgn0036109", "LINK")	The gene Cuticular protein 67Fa2 is referred to in FlyBase by the symbol Dmel\Cpr67Fa2 (CG18349, FBgn0036109). It is a protein_coding_gene from Dmel. It has one annotated transcript and one polypeptide. Gene sequence location is 3L:10891714..10892516. Its molecular function is described by: structural constituent of cuticle; structural constituent of chitin-based larval cuticle. It is involved in…
novel.38	6.62	3.93	3.24	13.3	6.58	6.44	-0.926752	0.0103239	0.412585		-	=HYPERLINK("http://flybase.org/reports/novel.38", "LINK")
novel.33	8.59	12.14	3.81	3.73	3.14	2.67	1.36468	1.18971e-05	0.00196251	UP	-	LINK
FBgn0053192	85.42	134.63	171.7	43.92	58.29	52.16	1.34652	4.78938e-09	1.90421e-06	UP	MtnD	LINK	The gene Metallothionein D is referred to in FlyBase by the symbol Dmel\MtnD (CG33192, FBgn0053192). It is a protein_coding_gene from Dmel. It has one annotated transcript and one polypeptide. Gene sequence location is 3R:20534962..20535301. Its molecular function is described by: metal ion binding. It is involved in the biological process described with: response to copper ion; response to metal…
FBgn0013772	40.12	68.64	56.92	27.49	21.48	21.15	1.24211	3.41092e-10	1.95365e-07	UP	Cyp6a8	LINK	The gene Cytochrome P450-6a8 is referred to in FlyBase by the symbol Dmel\Cyp6a8 (CG10248, FBgn0013772). It is a protein_coding_gene from Dmel. It has one annotated transcript and one polypeptide. Gene sequence location is 2R:14887171..14889010. Its molecular function is described by: heme binding; electron transfer activity; alkane 1-monooxygenase activity; iron ion binding. It is involved in th…
FBgn0036181	0.15	0.16	0.16	0.28	0.28	0.33	-0.900251	0.00421323	0.240185		Muc68Ca	=HYPERLINK("http://flybase.org/reports/FBgn0036181", "LINK")	The gene Mucin 68Ca is referred to in FlyBase by the symbol Dmel\Muc68Ca (CG18331, FBgn0036181). It is a protein_coding_gene from Dmel. It has one annotated transcript and one polypeptide. Gene sequence location is 3L:11610578..11620101. Its molecular function is described by: extracellular matrix structural constituent. The biological processes in which it is involved are not known. 2 alleles ar…
FBgn0033985	1.58	1.22	1.13	3.02	2.03	2.21	-0.884468	0.00473233	0.253908		CG10257	=HYPERLINK("http://flybase.org/reports/FBgn0033985", "LINK")	This gene is referred to in FlyBase by the symbol Dmel\CG10257 (FBgn0033985). It is a protein_coding_gene from Dmel. It has one annotated transcript and one polypeptide. Gene sequence location is 2R:14942398..14944469. Its molecular function is unknown. It is involved in the biological process described with: negative regulation of extrinsic apoptotic signaling pathway via death domain receptors;…
FBgn0267136	0.66	0.27	0.71	1.12	1.2	0.7	-0.876237	0.0438302	0.827687		lncRNA:CR45576	=HYPERLINK("http://flybase.org/reports/FBgn0267136", "LINK")	The gene long non-coding RNA:CR45576 is referred to in FlyBase by the symbol Dmel\lncRNA:CR45576 (CR45576, FBgn0267136). It is a non_protein_coding_gene from Dmel. It has one annotated transcript. Gene sequence location is 3R:10488323..10490216. Its molecular function is unknown. The biological processes in which it is involved are not known. No alleles are reported.
FBgn0038629	0.22	0.23	0.15	0.41	0.38	0.32	-0.872444	0.0434486	0.826545		CG14304	=HYPERLINK("http://flybase.org/reports/FBgn0038629", "LINK")	This gene is referred to in FlyBase by the symbol Dmel\CG14304 (FBgn0038629). It is a protein_coding_gene from Dmel. It has 3 annotated transcripts and 3 polypeptides (2 unique). Gene sequence location is 3R:18592801..18621327. Its molecular function is described by: chitin binding. It is involved in the biological process described with: chitin metabolic process. 12 alleles are reported. No phen…
novel.175	3.19	4.59	2.53	5.41	6.73	6.65	-0.863899	0.0069258	0.321296		-	=HYPERLINK("http://flybase.org/reports/novel.175", "LINK")
FBgn0031811	0.47	0.55	0.55	0.77	0.76	1.31	-0.862149	0.0161914	0.524142		CG13982	=HYPERLINK("http://flybase.org/reports/FBgn0031811", "LINK")	This gene is referred to in FlyBase by the symbol Dmel\CG13982 (FBgn0031811). It is a protein_coding_gene from Dmel. It has 2 annotated transcripts and 2 polypeptides (1 unique). Gene sequence location is 2L:6412315..6415335. Its molecular function is unknown. The biological processes in which it is involved are not known. 4 alleles are reported. No phenotypic data is available. No phenotypic cla…
FBgn0053499	8.74	6.33	7.38	3.14	3.32	3.19	1.22232	3.52781e-10	1.95365e-07	UP	Sdic4	LINK	The gene Sperm-specific dynein intermediate chain 4 is referred to in FlyBase by the symbol Dmel\Sdic4 (CG33499, FBgn0053499). It is a protein_coding_gene from Dmel. It has one annotated transcript and one polypeptide. Gene sequence location is X:20220666..20225020. Its molecular function is described by: . It is involved in the biological process described with: microtubule-based movement. 3 all…
FBgn0037165	4.59	5.62	5.5	2.25	2.45	2.13	1.20324	2.70232e-06	0.000551408	UP	CG11437	LINK	This gene is referred to in FlyBase by the symbol Dmel\CG11437 (FBgn0037165). It is a protein_coding_gene from Dmel. It has one annotated transcript and one polypeptide. Gene sequence location is 3L:22468862..22469853. Its molecular function is described by: lipid phosphatase activity; phosphatidate phosphatase activity; phosphatase activity. It is involved in the biological process described wit…
FBgn0001148	0.77	1.02	0.94	1.55	1.29	2.07	-0.849295	0.0118062	0.444408		gsb	=HYPERLINK("http://flybase.org/reports/FBgn0001148", "LINK")	The gene gooseberry is referred to in FlyBase by the symbol Dmel\gsb (CG3388, FBgn0001148). It is a protein_coding_gene from Dmel. It has one annotated transcript and one polypeptide. Gene sequence location is 2R:25061964..25064643. Its molecular function is described by: DNA-binding transcription factor activity, RNA polymerase II-specific; RNA polymerase II transcription regulatory region seque…
FBgn0264338	1.4	1.55	1.23	2.86	1.93	2.62	-0.830108	0.035454	0.765669		lncRNA:CR43794	=HYPERLINK("http://flybase.org/reports/FBgn0264338", "LINK")	The gene long non-coding RNA:CR43794 is referred to in FlyBase by the symbol Dmel\lncRNA:CR43794 (CR43794, FBgn0264338). It is a non_protein_coding_gene from Dmel. It has one annotated transcript. Gene sequence location is 2R:23507078..23507832. Its molecular function is unknown. The biological processes in which it is involved are not known. One allele is reported. No phenotypic data is availabl…
FBgn0265163	2.6	4.32	3.44	6.08	5.75	6.46	-0.827876	0.00397686	0.231542		lncRNA:CR44232	=HYPERLINK("http://flybase.org/reports/FBgn0265163", "LINK")	The gene long non-coding RNA:CR44232 is referred to in FlyBase by the symbol Dmel\lncRNA:CR44232 (CR44232, FBgn0265163). It is a non_protein_coding_gene from Dmel. It has 2 annotated transcripts. Gene sequence location is 3R:12767627..12768357. Its molecular function is unknown. The biological processes in which it is involved are not known. No alleles are reported.
FBgn0030562	3.35	4.54	1.99	5.46	6.26	5.72	-0.815781	0.00305219	0.190441		CG9400	=HYPERLINK("http://flybase.org/reports/FBgn0030562", "LINK")	This gene is referred to in FlyBase by the symbol Dmel\CG9400 (FBgn0030562). It is a protein_coding_gene from Dmel. It has one annotated transcript and one polypeptide. Gene sequence location is X:14288084..14289393. Its molecular function is described by: . It is involved in the biological process described with: multicellular organism reproduction. 4 alleles are reported. No phenotypic data is …
FBgn0283462	0.77	2.19	2.86	2.87	3.48	3.84	-0.815551	0.0307304	0.717349		IMPPP	=HYPERLINK("http://flybase.org/reports/FBgn0283462", "LINK")	The gene Immune induced molecule prepropeptide is referred to in FlyBase by the symbol Dmel\IMPPP (CG18279, FBgn0283462). It is a protein_coding_gene from Dmel. It has 2 annotated transcripts and 2 polypeptides (1 unique). Gene sequence location is 2R:13407011..13408358. Its molecular function is described by: . It is involved in the biological process described with: response to bacterium; humor…
FBgn0285992	0.52	0.35	0.26	0.63	0.76	0.6	-0.799359	0.00781339	0.344189		hpRNA:CR46342	=HYPERLINK("http://flybase.org/reports/FBgn0285992", "LINK")	The gene hairpin RNA:CR46342 is referred to in FlyBase by the symbol Dmel\hpRNA:CR46342 (CR46342, FBgn0285992). It is a non_protein_coding_gene from Dmel. It has one annotated transcript. Gene sequence location is X:4921677..4928133. Its molecular function is unknown. The biological processes in which it is involved are not known. One allele is reported. No phenotypic data is available. No phenot…
FBgn0050031	2.15	3.6	3.23	4.3	5.04	6.24	-0.798166	0.00663103	0.317348		CG30031	=HYPERLINK("http://flybase.org/reports/FBgn0050031", "LINK")	This gene is referred to in FlyBase by the symbol Dmel\CG30031 (FBgn0050031). It is a protein_coding_gene from Dmel. It has one annotated transcript and one polypeptide. Gene sequence location is 2R:11350811..11351621. Its molecular function is described by: serine-type endopeptidase activity. It is involved in the biological process described with: proteolysis. One allele is reported. No phenoty…
FBgn0050081	0.47	0.6	0.72	1.27	0.75	1.07	-0.797928	0.043051	0.821093		Ir51b	=HYPERLINK("http://flybase.org/reports/FBgn0050081", "LINK")	The gene Ionotropic receptor 51b is referred to in FlyBase by the symbol Dmel\Ir51b (CG30081, FBgn0050081). It is a protein_coding_gene from Dmel. It has one annotated transcript and one polypeptide. Gene sequence location is 2R:15207993..15209786. Its molecular function is described by: ligand-gated ion channel activity. It is involved in the biological process described with: detection of chemi…
FBgn0267042	5.53	3.77	4.56	9.1	9.44	5.66	-0.797174	0.00463391	0.251236		CG45486	=HYPERLINK("http://flybase.org/reports/FBgn0267042", "LINK")	This gene is referred to in FlyBase by the symbol Dmel\CG45486 (FBgn0267042). It is a protein_coding_gene from Dmel. It has one annotated transcript and one polypeptide. Gene sequence location is X:19909318..19910117. Its molecular function is described by: . It is involved in the biological process described with: . No alleles are reported.
FBgn0039591	0.58	0.98	0.96	1.31	1.32	1.71	-0.791903	0.0122536	0.451382		CG9988	=HYPERLINK("http://flybase.org/reports/FBgn0039591", "LINK")	This gene is referred to in FlyBase by the symbol Dmel\CG9988 (FBgn0039591). It is a protein_coding_gene from Dmel. It has one annotated transcript and one polypeptide. Gene sequence location is 3R:28636411..28638799. Its molecular function is described by: catalytic activity. It is involved in the biological process described with: multicellular organism reproduction. 3 alleles are reported. No …
FBgn0263415	11.95	11.86	11.36	3.85	6.73	5.46	1.14822	2.42601e-05	0.00368801	UP	lncRNA:CR43461	LINK	The gene long non-coding RNA:CR43461 is referred to in FlyBase by the symbol Dmel\lncRNA:CR43461 (CR43461, FBgn0263415). It is a non_protein_coding_gene from Dmel. It has one annotated transcript. Gene sequence location is X:6732717..6735917. Its molecular function is unknown. The biological processes in which it is involved are not known. No alleles are reported.
FBgn0036440	5.87	5.23	5.28	2.52	2.7	2.52	1.08695	4.6502e-12	3.43362e-09	UP	CG17177	LINK	This gene is referred to in FlyBase by the symbol Dmel\CG17177 (FBgn0036440). It is a protein_coding_gene from Dmel. It has 2 annotated transcripts and 2 polypeptides (all unique). Gene sequence location is 3L:14697313..14701678. Its molecular function is unknown. The biological processes in which it is involved are not known. 3 alleles are reported. No phenotypic data is available. The phenotypi…
FBgn0030028	1.85	1.87	1.85	2.64	3.23	3.74	-0.781188	0.0049982	0.261243		Corp	=HYPERLINK("http://flybase.org/reports/FBgn0030028", "LINK")	The gene Companion of reaper is referred to in FlyBase by the symbol Dmel\Corp (CG10965, FBgn0030028). It is a protein_coding_gene from Dmel. It has 2 annotated transcripts and 2 polypeptides (1 unique). Gene sequence location is X:8269898..8271409. Its molecular function is described by: p53 binding. It is involved in the biological process described with: negative regulation of intrinsic apopto…
FBgn0039684	4.34	3.57	5.14	8.86	7.44	6.09	-0.780604	0.00768759	0.341436		Obp99d	=HYPERLINK("http://flybase.org/reports/FBgn0039684", "LINK")	The gene Odorant-binding protein 99d is referred to in FlyBase by the symbol Dmel\Obp99d (CG15505, FBgn0039684). It is a protein_coding_gene from Dmel. It has one annotated transcript and one polypeptide. Gene sequence location is 3R:29714505..29715004. Its molecular function is described by: odorant binding. It is involved in the biological process described with: sensory perception of chemical …
FBgn0013680	77.71	128.04	52.16	123.73	158.3	154.81	-0.756978	0.00224754	0.154758		mt:ND2	=HYPERLINK("http://flybase.org/reports/FBgn0013680", "LINK")	The gene mitochondrial NADH-ubiquinone oxidoreductase chain 2 is referred to in FlyBase by the symbol Dmel\mt:ND2 (CG34063, FBgn0013680). It is a protein_coding_gene from Dmel. It has one annotated transcript and one polypeptide. Gene sequence location is mitochondrion_genome:240..1263. Its molecular function is described by: NADH dehydrogenase (ubiquinone) activity. It is involved in the biologi…
FBgn0034475	7.68	7.39	5.87	3.11	3.49	3.4	1.07463	0.00010716	0.0136924	UP	Obp56h	LINK	The gene Odorant-binding protein 56h is referred to in FlyBase by the symbol Dmel\Obp56h (CG13874, FBgn0034475). It is a protein_coding_gene from Dmel. It has 2 annotated transcripts and 2 polypeptides (1 unique). Gene sequence location is 2R:19815554..19816204. Its molecular function is described by: odorant binding. It is involved in the biological process described with 6 unique terms, many of…
FBgn0024989	0.51	0.55	0.55	0.64	1.01	1.05	-0.73651	0.0123718	0.451382		CG3777	=HYPERLINK("http://flybase.org/reports/FBgn0024989", "LINK")	This gene is referred to in FlyBase by the symbol Dmel\CG3777 (FBgn0024989). It is a protein_coding_gene from Dmel. It has 5 annotated transcripts and 5 polypeptides (1 unique). Gene sequence location is X:279703..350504. Its molecular function is unknown. The biological processes in which it is involved are not known. 39 alleles are reported. No phenotypic data is available. The phenotypic class…
FBgn0036780	3.03	2.97	2.8	1.31	1.2	1.69	1.07054	0.000342186	0.0363421	UP	CG7330	LINK	This gene is referred to in FlyBase by the symbol Dmel\CG7330 (FBgn0036780). It is a protein_coding_gene from Dmel. It has 2 annotated transcripts and 2 polypeptides (1 unique). Gene sequence location is 3L:18148923..18153807. Its molecular function is unknown. The biological processes in which it is involved are not known. 8 alleles are reported. No phenotypic data is available. The phenotypic c…
FBgn0038067	43.27	54.57	37.4	18.82	22.53	23.92	1.05451	1.75351e-09	7.99702e-07	UP	CG11598	LINK	This gene is referred to in FlyBase by the symbol Dmel\CG11598 (FBgn0038067). It is a protein_coding_gene from Dmel. It has one annotated transcript and one polypeptide. Gene sequence location is 3R:12634917..12636283. Its molecular function is described by: sterol esterase activity; triglyceride lipase activity; lipase activity. It is involved in the biological process described with: lipid meta…
FBgn0029863	6.54	11.43	10.14	16.33	13.87	16.27	-0.726643	0.000555069	0.0528031		CG3823	=HYPERLINK("http://flybase.org/reports/FBgn0029863", "LINK")	This gene is referred to in FlyBase by the symbol Dmel\CG3823 (FBgn0029863). It is a protein_coding_gene from Dmel. It has one annotated transcript and one polypeptide. Gene sequence location is X:6303975..6306745. Its molecular function is described by: phosphatidylinositol bisphosphate binding. The biological processes in which it is involved are not known. 5 alleles are reported. No phenotypic…
FBgn0001992	0.5	0.47	0.63	0.72	1.26	0.69	-0.72659	0.0451274	0.835018		Cyp303a1	=HYPERLINK("http://flybase.org/reports/FBgn0001992", "LINK")	The gene Cyp303a1 is referred to in FlyBase by the symbol Dmel\Cyp303a1 (CG4163, FBgn0001992). It is a protein_coding_gene from Dmel. It has 2 annotated transcripts and 2 polypeptides (1 unique). Gene sequence location is 2L:16294183..16296969. Its molecular function is described by: oxidoreductase activity, acting on paired donors, with incorporation or reduction of molecular oxygen; heme bindin…
FBgn0036730	9.63	7.87	8.06	4.47	3.24	4.59	1.05365	2.70263e-06	0.000551408	UP	qjt	LINK	The gene quijote is referred to in FlyBase by the symbol Dmel\qjt (CG13732, FBgn0036730). It is a protein_coding_gene from Dmel. It has 2 annotated transcripts and 2 polypeptides (1 unique). Gene sequence location is 3L:17479096..17480141. Its molecular function is described by: zinc ion binding; SUMO ligase activity; SUMO transferase activity. It is involved in the biological process described w…
FBgn0030455	1.4	0.78	1.1	2.17	1.41	1.79	-0.711613	0.0392287	0.791057		CG4318	=HYPERLINK("http://flybase.org/reports/FBgn0030455", "LINK")	This gene is referred to in FlyBase by the symbol Dmel\CG4318 (FBgn0030455). It is a protein_coding_gene from Dmel. It has one annotated transcript and one polypeptide. Gene sequence location is X:13153461..13154924. Its molecular function is described by: DNA-binding transcription factor activity; zinc ion binding; transcription regulatory region sequence-specific DNA binding. It is involved in …
FBgn0037167	4.18	5.2	5.04	5.54	9.22	8.92	-0.711381	0.00402612	0.232944		CG11425	=HYPERLINK("http://flybase.org/reports/FBgn0037167", "LINK")	This gene is referred to in FlyBase by the symbol Dmel\CG11425 (FBgn0037167). It is a protein_coding_gene from Dmel. It has one annotated transcript and one polypeptide. Gene sequence location is 3L:22474795..22475792. Its molecular function is described by: phosphatase activity; phosphatidate phosphatase activity; lipid phosphatase activity. It is involved in the biological process described wit…
FBgn0030398	1.82	2.45	2.03	2.4	4.04	3.84	-0.702284	0.035638	0.767504		Cpr11B	=HYPERLINK("http://flybase.org/reports/FBgn0030398", "LINK")	The gene Cuticular protein 11B is referred to in FlyBase by the symbol Dmel\Cpr11B (CG2555, FBgn0030398). It is a protein_coding_gene from Dmel. It has 2 annotated transcripts and 2 polypeptides (all unique). Gene sequence location is X:12553124..12554235. Its molecular function is described by: structural constituent of cuticle; structural constituent of chitin-based larval cuticle. It is involv…
FBgn0032507	8.47	12.08	24.63	7.27	6.86	7.67	1.05133	0.000445413	0.0448479	UP	CG9377	LINK	This gene is referred to in FlyBase by the symbol Dmel\CG9377 (FBgn0032507). It is a protein_coding_gene from Dmel. It has one annotated transcript and one polypeptide. Gene sequence location is 2L:13359901..13361565. Its molecular function is unknown. It is involved in the biological process described with: proteolysis. 5 alleles are reported. No phenotypic data is available. The phenotypic clas…
FBgn0058198	2.77	4.28	3.72	3.9	7.22	6.34	-0.694548	0.00809478	0.348327		CG40198	=HYPERLINK("http://flybase.org/reports/FBgn0058198", "LINK")	This gene is referred to in FlyBase by the symbol Dmel\CG40198 (FBgn0058198). It is a protein_coding_gene from Dmel. It has 2 annotated transcripts and 2 polypeptides (1 unique). Gene sequence location is 3R:4160610..4162235. Its molecular function is described by: . It is involved in the biological process described with: . 2 alleles are reported. No phenotypic data is available. No phenotypic c…
FBgn0011589	0.73	0.9	0.81	1.59	1.11	1.23	-0.690897	0.00301187	0.190441		Elk	=HYPERLINK("http://flybase.org/reports/FBgn0011589", "LINK")	The gene Eag-like K[+] channel is referred to in FlyBase by the symbol Dmel\Elk (CG5076, FBgn0011589). It is a protein_coding_gene from Dmel. It has 2 annotated transcripts and 2 polypeptides (all unique). Gene sequence location is 2R:17873939..17926695. Its molecular function is described by: voltage-gated cation channel activity; voltage-gated potassium channel activity. It is involved in the b…
FBgn0014859	0.67	0.54	0.83	1.1	1	1.2	-0.689789	0.00175603	0.130282		Hr38	=HYPERLINK("http://flybase.org/reports/FBgn0014859", "LINK")	The gene Hormone receptor-like in 38 is referred to in FlyBase by the symbol Dmel\Hr38 (CG1864, FBgn0014859). It is a protein_coding_gene from Dmel. It has 2 annotated transcripts and 2 polypeptides (all unique). Gene sequence location is 2L:20683462..20714588. Its molecular function is described by 8 unique terms, many of which group under: binding; DNA binding; transcription regulator activity;…
FBgn0263250	2.51	2	2.45	3.51	3.95	3.79	-0.688622	0.00772074	0.341436		CG43393	=HYPERLINK("http://flybase.org/reports/FBgn0263250", "LINK")	This gene is referred to in FlyBase by the symbol Dmel\CG43393 (FBgn0263250). It is a protein_coding_gene from Dmel. It has one annotated transcript and one polypeptide. Gene sequence location is 2R:22089423..22090691. Its molecular function is described by: . It is involved in the biological process described with: . No alleles are reported.
novel.154	1.78	1.85	2.37	3.72	3.34	2.55	-0.685144	0.0393116	0.791057		-	=HYPERLINK("http://flybase.org/reports/novel.154", "LINK")
FBgn0001319	0.45	0.43	0.5	0.62	0.8	0.79	-0.680859	0.0195298	0.586877		kn	=HYPERLINK("http://flybase.org/reports/FBgn0001319", "LINK")	The gene knot is referred to in FlyBase by the symbol Dmel\kn (CG10197, FBgn0001319). It is a protein_coding_gene from Dmel. It has 5 annotated transcripts and 5 polypeptides (all unique). Gene sequence location is 2R:14772650..14807061. Its molecular function is described by: protein dimerization activity; DNA-binding transcription activator activity, RNA polymerase II-specific; DNA binding. It …
FBgn0035610	0.83	1.29	0.99	1.18	1.5	2.3	-0.680447	0.0256365	0.668099		Lkr	=HYPERLINK("http://flybase.org/reports/FBgn0035610", "LINK")	The gene Leucokinin receptor is referred to in FlyBase by the symbol Dmel\Lkr (CG10626, FBgn0035610). It is a protein_coding_gene from Dmel. It has one annotated transcript and one polypeptide. Gene sequence location is 3L:5512421..5529341. Its molecular function is described by: G protein-coupled receptor activity; neuropeptide receptor activity; leucokinin receptor activity; neuropeptide Y rece…
FBgn0033978	48.35	91.29	106.59	89.33	148.11	155.78	-0.672254	0.00888548	0.369737		Cyp6a23	=HYPERLINK("http://flybase.org/reports/FBgn0033978", "LINK")	The gene Cyp6a23 is referred to in FlyBase by the symbol Dmel\Cyp6a23 (CG10242, FBgn0033978). It is a protein_coding_gene from Dmel. It has one annotated transcript and one polypeptide. Gene sequence location is 2R:14875829..14877654. Its molecular function is described by: heme binding; oxidoreductase activity, acting on paired donors, with incorporation or reduction of molecular oxygen; iron io…
FBgn0039596	1.13	0.98	1.05	1.57	1.43	2	-0.659087	0.0127338	0.457542		CG10000	=HYPERLINK("http://flybase.org/reports/FBgn0039596", "LINK")	This gene is referred to in FlyBase by the symbol Dmel\CG10000 (FBgn0039596). It is a protein_coding_gene from Dmel. It has one annotated transcript and one polypeptide. Gene sequence location is 3R:28748384..28751661. Its molecular function is described by: polypeptide N-acetylgalactosaminyltransferase activity. It is involved in the biological process described with: multicellular organism repr…
novel.27	1.18	1	0.74	1.72	1.49	1.41	-0.654258	0.0426902	0.817929		-	=HYPERLINK("http://flybase.org/reports/novel.27", "LINK")
FBgn0035279	3.41	2.73	3.41	4.03	6.28	4.77	-0.648253	0.0148077	0.499971		Cpr62Ba	=HYPERLINK("http://flybase.org/reports/FBgn0035279", "LINK")	The gene Cuticular protein 62Ba is referred to in FlyBase by the symbol Dmel\Cpr62Ba (CG13934, FBgn0035279). It is a protein_coding_gene from Dmel. It has 2 annotated transcripts and 2 polypeptides (1 unique). Gene sequence location is 3L:1824129..1831783. Its molecular function is described by: structural constituent of chitin-based larval cuticle; structural constituent of cuticle. It is involv…
FBgn0015316	11.2	16.06	11.79	6.89	7.39	5.38	0.991394	1.53964e-06	0.000345996	UP	Try29F	LINK	The gene Trypsin 29F is referred to in FlyBase by the symbol Dmel\Try29F (CG9564, FBgn0015316). It is a protein_coding_gene from Dmel. It has 2 annotated transcripts and 2 polypeptides (1 unique). Gene sequence location is 2L:8998537..8999816. Its molecular function is described by: serine-type endopeptidase activity. It is involved in the biological process described with: proteolysis. 4 alleles…
FBgn0030017	1.18	0.84	1.45	1.84	1.87	1.68	-0.633282	0.00634667	0.30947		CG2278	=HYPERLINK("http://flybase.org/reports/FBgn0030017", "LINK")	This gene is referred to in FlyBase by the symbol Dmel\CG2278 (FBgn0030017). It is a protein_coding_gene from Dmel. It has 3 annotated transcripts and 3 polypeptides (2 unique). Gene sequence location is X:8165833..8170266. Its molecular function is unknown. The biological processes in which it is involved are not known. 3 alleles are reported. No phenotypic data is available. The phenotypic clas…
FBgn0037996	0.82	1.1	1.12	1.66	1.53	1.49	-0.624435	0.0393511	0.791057		CG4830	=HYPERLINK("http://flybase.org/reports/FBgn0037996", "LINK")	This gene is referred to in FlyBase by the symbol Dmel\CG4830 (FBgn0037996). It is a protein_coding_gene from Dmel. It has one annotated transcript and one polypeptide. Gene sequence location is 3R:12208159..12210360. Its molecular function is described by: fatty acid ligase activity; CoA-ligase activity; long-chain fatty acid-CoA ligase activity. It is involved in the biological process describe…
FBgn0034705	2.92	3.14	2.32	4.07	4.56	4.33	-0.623898	0.00938039	0.385815		CG11170	=HYPERLINK("http://flybase.org/reports/FBgn0034705", "LINK")	This gene is referred to in FlyBase by the symbol Dmel\CG11170 (FBgn0034705). It is a protein_coding_gene from Dmel. It has 3 annotated transcripts and 3 polypeptides (1 unique). Gene sequence location is 2R:22177419..22182879. Its molecular function is unknown. The biological processes in which it is involved are not known. 6 alleles are reported. No phenotypic data is available. The phenotypic …
FBgn0037581	3.69	2.94	4.1	1.54	2.13	1.78	0.988675	0.000107731	0.0136924	UP	CG7352	LINK	This gene is referred to in FlyBase by the symbol Dmel\CG7352 (FBgn0037581). It is a protein_coding_gene from Dmel. It has 2 annotated transcripts and 2 polypeptides (all unique). Gene sequence location is 3R:8347579..8349296. Its molecular function is unknown. It is involved in the biological process described with: cilium organization. 4 alleles are reported. No phenotypic data is available. Th…
FBgn0036479	2.02	3.76	3.03	4.98	4.63	3.86	-0.61578	0.0105503	0.417329		CG13458	=HYPERLINK("http://flybase.org/reports/FBgn0036479", "LINK")	This gene is referred to in FlyBase by the symbol Dmel\CG13458 (FBgn0036479). It is a protein_coding_gene from Dmel. It has one annotated transcript and one polypeptide. Gene sequence location is 3L:15113557..15116373. Its molecular function is described by: translation regulator activity. It is involved in the biological process described with: positive regulation of mitochondrial translation. 7…
FBgn0001224	64.36	37.45	28.4	21.37	23.56	20.89	0.987195	4.89607e-05	0.0068395	UP	Hsp23	LINK	The gene Heat shock protein 23 is referred to in FlyBase by the symbol Dmel\Hsp23 (CG4463, FBgn0001224). It is a protein_coding_gene from Dmel. It has 2 annotated transcripts and 2 polypeptides (1 unique). Gene sequence location is 3L:9381882..9382765. Its molecular function is described by: unfolded protein binding; protein binding. It is involved in the biological process described with: protei…
FBgn0029082	0.46	0.53	0.52	0.8	0.73	0.78	-0.614714	0.0157119	0.513986		hbs	=HYPERLINK("http://flybase.org/reports/FBgn0029082", "LINK")	The gene hibris is referred to in FlyBase by the symbol Dmel\hbs (CG7449, FBgn0029082). It is a protein_coding_gene from Dmel. It has 3 annotated transcripts and 3 polypeptides (2 unique). Gene sequence location is 2R:15011396..15042134. Its molecular function is described by: cell adhesion molecule binding; protein binding. It is involved in the biological process described with 13 unique terms,…
FBgn0283427	124.27	88.43	209.76	199.7	226.72	220.27	-0.612418	0.00943442	0.387011		FASN1	=HYPERLINK("http://flybase.org/reports/FBgn0283427", "LINK")	The gene Fatty acid synthase 1 is referred to in FlyBase by the symbol Dmel\FASN1 (CG3523, FBgn0283427). It is a protein_coding_gene from Dmel. It has 2 annotated transcripts and 2 polypeptides (all unique). Gene sequence location is 2L:3056598..3068177. Its molecular function is described by: fatty acid synthase activity; phosphopantetheine binding; oxidoreductase activity; hydrolase activity, a…
FBgn0015553	0.91	0.86	1.3	1.54	1.36	1.75	-0.603071	0.0347106	0.756993		tos	=HYPERLINK("http://flybase.org/reports/FBgn0015553", "LINK")	The gene tosca is referred to in FlyBase by the symbol Dmel\tos (CG10387, FBgn0015553). It is a protein_coding_gene from Dmel. It has one annotated transcript and one polypeptide. Gene sequence location is 2L:18679631..18682075. Its molecular function is described by 7 unique terms, many of which group under: deoxyribonuclease activity; hydrolase activity, acting on ester bonds; catalytic activit…
FBgn0040069	5.3	6.94	6.75	3.36	3.69	2.54	0.985242	3.6707e-06	0.000711474	UP	vanin-like	LINK	The gene vanin-like is referred to in FlyBase by the symbol Dmel\vanin-like (CG32754, FBgn0040069). It is a protein_coding_gene from Dmel. It has one annotated transcript and one polypeptide. Gene sequence location is X:6200188..6202559. Its molecular function is described by: hydrolase activity; hydrolase activity, acting on carbon-nitrogen (but not peptide) bonds, in linear amides. It is involv…
FBgn0259140	1.4	1.56	1.74	0.67	0.96	0.81	0.95408	5.00888e-07	0.000123282	UP	CG42255	LINK	This gene is referred to in FlyBase by the symbol Dmel\CG42255 (FBgn0259140). It is a protein_coding_gene from Dmel. It has one annotated transcript and one polypeptide. Gene sequence location is 3L:11801951..11814755. Its molecular function is described by: calcium ion binding. The biological processes in which it is involved are not known. 10 alleles are reported. No phenotypic data is availabl…
novel.50	4.6	2.81	3.26	5.58	5.36	5.26	-0.596215	0.00493225	0.259252		-	=HYPERLINK("http://flybase.org/reports/novel.50", "LINK")
FBgn0266129	0.42	0.41	0.54	0.72	0.68	0.67	-0.594091	0.0281101	0.69734		lov	=HYPERLINK("http://flybase.org/reports/FBgn0266129", "LINK")	The gene jim lovell is referred to in FlyBase by the symbol Dmel\lov (CG16778, FBgn0266129). It is a protein_coding_gene from Dmel. It has 5 annotated transcripts and 5 polypeptides (2 unique). Gene sequence location is 2R:25085780..25139627. Its molecular function is described by: DNA binding. It is involved in the biological process described with 8 unique terms, many of which group under: mult…
FBgn0262682	16.55	19.04	15.11	7.75	9.52	9.08	0.949426	8.33499e-07	0.000201941	UP	asRNA:CR43152	LINK	The gene antisense RNA:CR43152 is referred to in FlyBase by the symbol Dmel\asRNA:CR43152 (CR43152, FBgn0262682). It is a non_protein_coding_gene from Dmel. It has one annotated transcript. Gene sequence location is X:12973825..12974615. Its molecular function is unknown. The biological processes in which it is involved are not known. No alleles are reported.
FBgn0266766	0.61	0.74	0.87	1.09	1.06	1.17	-0.591097	0.0108047	0.421945		lncRNA:CR45231	=HYPERLINK("http://flybase.org/reports/FBgn0266766", "LINK")	The gene long non-coding RNA:CR45231 is referred to in FlyBase by the symbol Dmel\lncRNA:CR45231 (CR45231, FBgn0266766). It is a non_protein_coding_gene from Dmel. It has one annotated transcript. Gene sequence location is 2R:19784294..19789736. Its molecular function is unknown. The biological processes in which it is involved are not known. No alleles are reported.
FBgn0037921	0.81	0.66	0.77	1.09	1.25	1	-0.570858	0.0400929	0.796156		CG6808	=HYPERLINK("http://flybase.org/reports/FBgn0037921", "LINK")	The gene ZAD and Architectural Function 1 is referred to in FlyBase by the symbol Dmel\Zaf1 (CG6808, FBgn0037921). It is a protein_coding_gene from Dmel. It has 2 annotated transcripts and 2 polypeptides (1 unique). Gene sequence location is 3R:11621466..11625644. Its molecular function is described by: zinc ion binding; transcription regulatory region sequence-specific DNA binding; DNA-binding t…
FBgn0001296	9.31	9.74	8.69	17.21	13.43	10.5	-0.567735	0.00238427	0.160046		kar	=HYPERLINK("http://flybase.org/reports/FBgn0001296", "LINK")	The gene karmoisin is referred to in FlyBase by the symbol Dmel\kar (CG12286, FBgn0001296). It is a protein_coding_gene from Dmel. It has 2 annotated transcripts and 2 polypeptides (all unique). Gene sequence location is 3R:12682186..12689367. Its molecular function is described by: thyroid hormone transmembrane transporter activity; aromatic amino acid transmembrane transporter activity. It is i…
FBgn0039599	12.54	19.33	11.79	22.27	20.9	21.54	-0.566955	0.00490937	0.258928		intr	=HYPERLINK("http://flybase.org/reports/FBgn0039599", "LINK")	The gene intrepid is referred to in FlyBase by the symbol Dmel\intr (CG12558, FBgn0039599). It is a protein_coding_gene from Dmel. It has one annotated transcript and one polypeptide. Gene sequence location is 3R:28790522..28791461. Its molecular function is described by: serine-type endopeptidase activity. It is involved in the biological process described with: multicellular organism reproducti…
FBgn0036262	390.32	650.23	566.24	588.17	876.96	909.83	-0.560554	0.0065686	0.316313		CG6910	=HYPERLINK("http://flybase.org/reports/FBgn0036262", "LINK")	This gene is referred to in FlyBase by the symbol Dmel\CG6910 (FBgn0036262). It is a protein_coding_gene from Dmel. It has 2 annotated transcripts and 2 polypeptides (all unique). Gene sequence location is 3L:12184984..12187860. Its molecular function is described by: iron ion binding; inositol oxygenase activity. It is involved in the biological process described with: oxidation-reduction proces…
FBgn0053470	17.92	32.2	18.43	49.92	23.68	27.45	-0.559081	0.0419958	0.815003		CG33470	=HYPERLINK("http://flybase.org/reports/FBgn0053470", "LINK")	This gene is referred to in FlyBase by the symbol Dmel\CG33470 (FBgn0053470). It is a protein_coding_gene from Dmel. It has 2 annotated transcripts and 2 polypeptides (1 unique). Gene sequence location is 2R:13411739..13413085. Its molecular function is described by: . It is involved in the biological process described with: . 2 alleles are reported. No phenotypic data is available. No phenotypic…
FBgn0037973	85.64	106.84	131.32	114.97	174.54	184.91	-0.548446	0.00644931	0.312509		CG18547	=HYPERLINK("http://flybase.org/reports/FBgn0037973", "LINK")	This gene is referred to in FlyBase by the symbol Dmel\CG18547 (FBgn0037973). It is a protein_coding_gene from Dmel. It has one annotated transcript and one polypeptide. Gene sequence location is 3R:11978574..11980390. Its molecular function is described by: oxidoreductase activity. It is involved in the biological process described with: oxidation-reduction process. 6 alleles are reported. No ph…
FBgn0034104	8.14	10.47	8.06	12.9	15.23	10.88	-0.547243	0.0224633	0.626467		CG15705	=HYPERLINK("http://flybase.org/reports/FBgn0034104", "LINK")	This gene is referred to in FlyBase by the symbol Dmel\CG15705 (FBgn0034104). It is a protein_coding_gene from Dmel. It has one annotated transcript and one polypeptide. Gene sequence location is 2R:16280950..16281629. Its molecular function is described by: . It is involved in the biological process described with: . 3 alleles are reported. No phenotypic data is available. The phenotypic class o…
FBgn0039419	5.34	5.54	5.76	10.92	7.25	6.09	-0.544479	0.00768339	0.341436		CG12290	=HYPERLINK("http://flybase.org/reports/FBgn0039419", "LINK")	This gene is referred to in FlyBase by the symbol Dmel\CG12290 (FBgn0039419). It is a protein_coding_gene from Dmel. It has 2 annotated transcripts and 2 polypeptides (1 unique). Gene sequence location is 3R:26230248..26234700. Its molecular function is described by: G protein-coupled receptor activity; dopamine neurotransmitter receptor activity, coupled via Gi/Go. It is involved in the biologic…
FBgn0083977	1.23	1.4	1.26	1.94	1.89	1.85	-0.54417	0.0158262	0.515618		CG34141	=HYPERLINK("http://flybase.org/reports/FBgn0083977", "LINK")	This gene is referred to in FlyBase by the symbol Dmel\CG34141 (FBgn0083977). It is a protein_coding_gene from Dmel. It has 4 annotated transcripts and 4 polypeptides (2 unique). Gene sequence location is 2R:9260278..9263971. Its molecular function is described by: . It is involved in the biological process described with: . No alleles are reported. Summary of modENCODE Temporal Expression Profil…
FBgn0264090	1.02	0.67	1.16	1.3	1.34	1.52	-0.542101	0.0181102	0.560358		CG43759	=HYPERLINK("http://flybase.org/reports/FBgn0264090", "LINK")	This gene is referred to in FlyBase by the symbol Dmel\CG43759 (FBgn0264090). It is a protein_coding_gene from Dmel. It has 4 annotated transcripts and 4 polypeptides (2 unique). Gene sequence location is X:18930335..19028629. Its molecular function is unknown. The biological processes in which it is involved are not known. 30 alleles are reported. The phenotypes of these alleles manifest in: mac…
FBgn0037548	8.92	8.61	7.46	11.14	11.5	13.62	-0.532902	0.00107662	0.0883355		CG7900	=HYPERLINK("http://flybase.org/reports/FBgn0037548", "LINK")	This gene is referred to in FlyBase by the symbol Dmel\CG7900 (FBgn0037548). It is a protein_coding_gene from Dmel. It has one annotated transcript and one polypeptide. Gene sequence location is 3R:8094124..8105083. Its molecular function is described by: acylglycerol lipase activity; anandamide amidohydrolase activity. The biological processes in which it is involved are not known. 3 alleles are…
FBgn0083956	18	15.34	28.8	27.96	32.07	29.98	-0.53258	0.00881929	0.369737		CG34120	=HYPERLINK("http://flybase.org/reports/FBgn0083956", "LINK")	This gene is referred to in FlyBase by the symbol Dmel\CG34120 (FBgn0083956). It is a protein_coding_gene from Dmel. It has 4 annotated transcripts and 4 polypeptides (all unique). Gene sequence location is X:21123634..21140951. Its molecular function is described by: lipid transporter activity; ATPase-coupled transmembrane transporter activity; ATPase activity; ATP binding. It is involved in the…
FBgn0034330	41.95	65.25	40.57	85.52	74.5	53.7	-0.532047	0.0199991	0.591256		CG18107	=HYPERLINK("http://flybase.org/reports/FBgn0034330", "LINK")	The gene Bomanin Short 4 is referred to in FlyBase by the symbol Dmel\BomS4 (CG18107, FBgn0034330). It is a protein_coding_gene from Dmel. It has one annotated transcript and one polypeptide. Gene sequence location is 2R:18384567..18384911. Its molecular function is unknown. The biological processes in which it is involved are not known. 3 alleles are reported. No phenotypic data is available. Th…
FBgn0015524	1.19	0.93	1.11	1.43	1.57	1.68	-0.527204	0.0257439	0.669049		otp	=HYPERLINK("http://flybase.org/reports/FBgn0015524", "LINK")	The gene orthopedia is referred to in FlyBase by the symbol Dmel\otp (CG10036, FBgn0015524). It is a protein_coding_gene from Dmel. It has 9 annotated transcripts and 9 polypeptides (all unique). Gene sequence location is 2R:20883625..20903414. Its molecular function is described by: sequence-specific DNA binding; DNA binding. It is involved in the biological process described with: regulation of…
FBgn0026315	12.93	18.37	12.68	20.89	22	20.39	-0.523085	0.00252546	0.166541		Ugt35a	=HYPERLINK("http://flybase.org/reports/FBgn0026315", "LINK")	The gene UDP-glycosyltransferase family 35 member A1 is referred to in FlyBase by the symbol Dmel\Ugt35A1 (CG6644, FBgn0026315). It is a protein_coding_gene from Dmel. It has one annotated transcript and one polypeptide. Gene sequence location is 3R:11170817..11172664. Its molecular function is described by: transferase activity, transferring hexosyl groups; UDP-glycosyltransferase activity. It i…
FBgn0034270	2	1.68	1.43	2.68	2.46	2.23	-0.522572	0.0393845	0.791057		PIG-A	=HYPERLINK("http://flybase.org/reports/FBgn0034270", "LINK")	The gene Phosphatidylinositol glycan anchor biosynthesis class A is referred to in FlyBase by the symbol Dmel\PIG-A (CG6401, FBgn0034270). It is a protein_coding_gene from Dmel. It has 2 annotated transcripts and 2 polypeptides (1 unique). Gene sequence location is 2R:17737622..17739685. Its molecular function is described by: phosphatidylinositol N-acetylglucosaminyltransferase activity. It is i…
FBgn0027556	62.81	55.95	75.82	80.87	99.09	99.43	-0.519817	0.000692086	0.0627572		CG4928	=HYPERLINK("http://flybase.org/reports/FBgn0027556", "LINK")	This gene is referred to in FlyBase by the symbol Dmel\CG4928 (FBgn0027556). It is a protein_coding_gene from Dmel. It has 3 annotated transcripts and 3 polypeptides (2 unique). Gene sequence location is X:16913180..16938209. Its molecular function is described by: potassium channel regulator activity. It is involved in the biological process described with: regulation of muscle contraction; regu…
FBgn0031118	2.91	2.38	3.9	4.49	4.5	4.17	-0.51782	0.00442941	0.244421		RhoGAP19D	=HYPERLINK("http://flybase.org/reports/FBgn0031118", "LINK")	The gene Rho GTPase activating protein at 19D is referred to in FlyBase by the symbol Dmel\RhoGAP19D (CG1412, FBgn0031118). It is a protein_coding_gene from Dmel. It has 5 annotated transcripts and 5 polypeptides (4 unique). Gene sequence location is X:20469955..20510694. Its molecular function is described by: GTPase activator activity. It is involved in the biological process described with: im…
FBgn0264897	24.76	29.86	13.93	29.8	35.84	32.58	-0.514842	0.030811	0.717349		CG44088	=HYPERLINK("http://flybase.org/reports/FBgn0264897", "LINK")	This gene is referred to in FlyBase by the symbol Dmel\CG44088 (FBgn0264897). It is a protein_coding_gene from Dmel. It has one annotated transcript and one polypeptide. Gene sequence location is 3R:4774516..4775053. Its molecular function is described by: . It is involved in the biological process described with: . No alleles are reported.
FBgn0263864	0.78	0.66	1.06	1.12	1.23	1.25	-0.513877	0.0340936	0.752757		Dark	=HYPERLINK("http://flybase.org/reports/FBgn0263864", "LINK")	The gene Death-associated APAF1-related killer is referred to in FlyBase by the symbol Dmel\Dark (CG6829, FBgn0263864). It is a protein_coding_gene from Dmel. It has 2 annotated transcripts and 2 polypeptides (all unique). Gene sequence location is 2R:17020027..17026703. Its molecular function is described by: ATP binding; ADP binding; CARD domain binding; cysteine-type endopeptidase activity inv…
FBgn0032713	26.71	34.83	33.5	42.48	46.49	46.04	-0.504223	0.000487526	0.048454		CG17323	=HYPERLINK("http://flybase.org/reports/FBgn0032713", "LINK")	The gene UDP-glycosyltransferase family 36 member D1 is referred to in FlyBase by the symbol Dmel\Ugt36D1 (CG17323, FBgn0032713). It is a protein_coding_gene from Dmel. It has 4 annotated transcripts and 4 polypeptides (1 unique). Gene sequence location is 2L:18823548..18826716. Its molecular function is described by: transferase activity, transferring hexosyl groups. The biological processes in …
FBgn0250910	0.93	0.81	0.95	1.38	1.19	1.23	-0.499628	0.0142744	0.486459		Octbeta3R	=HYPERLINK("http://flybase.org/reports/FBgn0250910", "LINK")	The gene Octopamine beta3 receptor is referred to in FlyBase by the symbol Dmel\Octbeta3R (CG42244, FBgn0250910). It is a protein_coding_gene from Dmel. It has 4 annotated transcripts and 4 polypeptides (all unique). Gene sequence location is 3R:12511570..12548229. Its molecular function is described by: G protein-coupled receptor activity; octopamine receptor activity; G protein-coupled amine re…
FBgn0053080	23.32	26.88	37.75	35.51	45.29	43.72	-0.499475	0.00704119	0.32302		CG33080	=HYPERLINK("http://flybase.org/reports/FBgn0053080", "LINK")	This gene is referred to in FlyBase by the symbol Dmel\CG33080 (FBgn0053080). It is a protein_coding_gene from Dmel. It has 4 annotated transcripts and 4 polypeptides (3 unique). Gene sequence location is X:5708559..5717778. Its molecular function is described by: hydrolase activity, hydrolyzing O-glycosyl compounds. It is involved in the biological process described with: carbohydrate metabolic …
FBgn0030594	71.43	89.34	73.29	87.6	123.69	120.06	-0.498678	0.00249352	0.165942		fiz	=HYPERLINK("http://flybase.org/reports/FBgn0030594", "LINK")	The gene fezzik is referred to in FlyBase by the symbol Dmel\fiz (CG9509, FBgn0030594). It is a protein_coding_gene from Dmel. It has 2 annotated transcripts and 2 polypeptides (1 unique). Gene sequence location is X:14906334..14909708. Its molecular function is described by: oxidoreductase activity; flavin adenine dinucleotide binding; ecdysone oxidase activity. It is involved in the biological …
FBgn0003396	3.28	2.11	3.75	4.64	4.08	4.18	-0.495936	0.0112548	0.434121		shn	=HYPERLINK("http://flybase.org/reports/FBgn0003396", "LINK")	The gene schnurri is referred to in FlyBase by the symbol Dmel\shn (CG7734, FBgn0003396). It is a protein_coding_gene from Dmel. It has 6 annotated transcripts and 6 polypeptides (3 unique). Gene sequence location is 2R:11159086..11217394. Its molecular function is described by 6 unique terms, many of which group under: transcription regulator activity; molecular function regulator; binding; tran…
FBgn0003339	0.99	0.96	1.45	1.52	1.67	1.61	-0.494876	0.029249	0.701923		Scr	=HYPERLINK("http://flybase.org/reports/FBgn0003339", "LINK")	The gene Sex combs reduced is referred to in FlyBase by the symbol Dmel\Scr (CG1030, FBgn0003339). It is a protein_coding_gene from Dmel. It has 5 annotated transcripts and 5 polypeptides (4 unique). Gene sequence location is 3R:6823120..6849981. Its molecular function is described by: sequence-specific DNA binding; protein homodimerization activity; DNA-binding transcription activator activity, …
FBgn0030803	7.76	8.24	10.86	12.61	12.47	12.74	-0.493232	0.00428609	0.240399		CG4880	=HYPERLINK("http://flybase.org/reports/FBgn0030803", "LINK")	This gene is referred to in FlyBase by the symbol Dmel\CG4880 (FBgn0030803). It is a protein_coding_gene from Dmel. It has 2 annotated transcripts and 2 polypeptides (all unique). Gene sequence location is X:16886818..16888729. Its molecular function is described by: ATP binding; ATPase activity. It is involved in the biological process described with: cellular response to misfolded protein. 6 al…
FBgn0267795	12.12	8.52	11.87	15.09	15.27	15.45	-0.492585	0.00165412	0.123311		Frl	=HYPERLINK("http://flybase.org/reports/FBgn0267795", "LINK")	The gene Formin-like is referred to in FlyBase by the symbol Dmel\Frl (CG32138, FBgn0267795). It is a protein_coding_gene from Dmel. It has 4 annotated transcripts and 4 polypeptides (all unique). Gene sequence location is 3L:14053215..14071583. Its molecular function is described by: actin filament binding; GTPase binding; Rho GTPase binding. It is involved in the biological process described wi…
FBgn0262998	8.77	5.4	7.5	10.61	9.91	10.11	-0.491818	0.0371869	0.779252		lncRNA:CR43306	=HYPERLINK("http://flybase.org/reports/FBgn0262998", "LINK")	The gene long non-coding RNA:CR43306 is referred to in FlyBase by the symbol Dmel\lncRNA:CR43306 (CR43306, FBgn0262998). It is a non_protein_coding_gene from Dmel. It has one annotated transcript. Gene sequence location is 3L:18294604..18295800. Its molecular function is unknown. It is involved in the biological process described with: spermatogenesis. One allele is reported. The phenotypes of th…
FBgn0030508	2.04	1.82	1.91	2.47	2.99	2.68	-0.489295	0.0058796	0.296968		CG15760	=HYPERLINK("http://flybase.org/reports/FBgn0030508", "LINK")	This gene is referred to in FlyBase by the symbol Dmel\CG15760 (FBgn0030508). It is a protein_coding_gene from Dmel. It has 3 annotated transcripts and 3 polypeptides (2 unique). Gene sequence location is X:13669699..13676232. Its molecular function is unknown. The biological processes in which it is involved are not known. 6 alleles are reported. No phenotypic data is available. The phenotypic c…
FBgn0263705	1.27	0.9	1.56	1.6	1.78	1.86	-0.488775	0.0138828	0.478702		Myo10A	=HYPERLINK("http://flybase.org/reports/FBgn0263705", "LINK")	The gene Myosin 10A is referred to in FlyBase by the symbol Dmel\Myo10A (CG43657, FBgn0263705). It is a protein_coding_gene from Dmel. It has 4 annotated transcripts and 4 polypeptides (3 unique). Gene sequence location is X:10930840..10964046. Its molecular function is described by: protein binding; actin filament binding; microfilament motor activity; actin-dependent ATPase activity; ATP bindin…
FBgn0265574	4.22	3.39	4.35	5.46	5.59	5.74	-0.485306	0.00317359	0.196054		Cdc5	=HYPERLINK("http://flybase.org/reports/FBgn0265574", "LINK")	The gene Cell division cycle 5 is referred to in FlyBase by the symbol Dmel\Cdc5 (CG6905, FBgn0265574). It is a protein_coding_gene from Dmel. It has 2 annotated transcripts and 2 polypeptides (1 unique). Gene sequence location is 3L:357851..361383. Its molecular function is described by: RNA binding; DNA binding. It is involved in the biological process described with: mRNA splicing, via spliceo…
FBgn0265856	9.17	8.87	13.51	12.86	17.25	14.1	-0.484718	0.0292883	0.701923		lncRNA:CR44645	=HYPERLINK("http://flybase.org/reports/FBgn0265856", "LINK")	The gene long non-coding RNA:CR44645 is referred to in FlyBase by the symbol Dmel\lncRNA:CR44645 (CR44645, FBgn0265856). It is a non_protein_coding_gene from Dmel. It has one annotated transcript. Gene sequence location is 2R:20506195..20506895. Its molecular function is unknown. The biological processes in which it is involved are not known. No alleles are reported.
FBgn0085218	9.18	14.03	9.44	13.83	16.19	15.65	-0.484128	0.0365547	0.778596		CG34189	=HYPERLINK("http://flybase.org/reports/FBgn0085218", "LINK")	This gene is referred to in FlyBase by the symbol Dmel\CG34189 (FBgn0085218). It is a protein_coding_gene from Dmel. It has one annotated transcript and one polypeptide. Gene sequence location is 2R:16754444..16754925. Its molecular function is described by: protein homodimerization activity. The biological processes in which it is involved are not known. One allele is reported. No phenotypic dat…
FBgn0262608	46.95	46.65	44.18	49.12	73.53	70.58	-0.483469	0.00754375	0.340995		CG43134	=HYPERLINK("http://flybase.org/reports/FBgn0262608", "LINK")	This gene is referred to in FlyBase by the symbol Dmel\CG43134 (FBgn0262608). It is a protein_coding_gene from Dmel. It has 2 annotated transcripts and 2 polypeptides (1 unique). Gene sequence location is X:4247313..4247785. Its molecular function is described by: . It is involved in the biological process described with: . No alleles are reported.
FBgn0029821	23.67	17.04	18.11	23.53	28.15	30.71	-0.482592	0.00471748	0.253908		CG4020	=HYPERLINK("http://flybase.org/reports/FBgn0029821", "LINK")	This gene is referred to in FlyBase by the symbol Dmel\CG4020 (FBgn0029821). It is a protein_coding_gene from Dmel. It has 2 annotated transcripts and 2 polypeptides (1 unique). Gene sequence location is X:5905746..5908001. Its molecular function is described by: fatty-acyl-CoA reductase (alcohol-forming) activity. It is involved in the biological process described with: long-chain fatty-acyl-CoA…
FBgn0051793	10.51	8.13	13.01	12.95	15.62	15.59	-0.478126	0.0077003	0.341436		CG31793	=HYPERLINK("http://flybase.org/reports/FBgn0051793", "LINK")	This gene is referred to in FlyBase by the symbol Dmel\CG31793 (FBgn0051793). It is a protein_coding_gene from Dmel. It has 2 annotated transcripts and 2 polypeptides (all unique). Gene sequence location is 2L:19003367..19008234. Its molecular function is described by: ATPase activity; ATPase-coupled transmembrane transporter activity; ATP binding. It is involved in the biological process describ…
FBgn0086558	155.3	150	128.96	218.46	210.87	175.38	-0.475522	0.00068971	0.0627572		Ubi-p5E	=HYPERLINK("http://flybase.org/reports/FBgn0086558", "LINK")	The gene Ubiquitin-5E is referred to in FlyBase by the symbol Dmel\Ubi-p5E (CG32744, FBgn0086558). It is a protein_coding_gene from Dmel. It has 2 annotated transcripts and 2 polypeptides (1 unique). Gene sequence location is X:6276876..6279647. Its molecular function is described by: protein tag; ubiquitin protein ligase binding. It is involved in the biological process described with: protein u…
FBgn0268063	12.09	11.56	14.41	16.72	18.56	17.59	-0.471989	0.000729913	0.0658025		ltl	=HYPERLINK("http://flybase.org/reports/FBgn0268063", "LINK")	The gene larval translucida is referred to in FlyBase by the symbol Dmel\ltl (CG32372, FBgn0268063). It is a protein_coding_gene from Dmel. It has 2 annotated transcripts and 2 polypeptides (1 unique). Gene sequence location is 3L:7518997..7528013. Its molecular function is unknown. It is involved in the biological process described with: imaginal disc-derived wing morphogenesis; negative regulat…
FBgn0036848	20.47	26.19	25.7	29.44	34.04	36.87	-0.470058	0.00343771	0.205811		CG10424	=HYPERLINK("http://flybase.org/reports/FBgn0036848", "LINK")	The gene NAD(P)HX dehydratase is referred to in FlyBase by the symbol Dmel\Naxd (CG10424, FBgn0036848). It is a protein_coding_gene from Dmel. It has one annotated transcript and one polypeptide. Gene sequence location is 3L:19096399..19097709. Its molecular function is described by: ADP-dependent NAD(P)H-hydrate dehydratase activity; ATP-dependent NAD(P)H-hydrate dehydratase activity. It is invo…
FBgn0037870	6.25	6.41	10.18	9.15	11.42	11.05	-0.468639	0.0467418	0.850786		CG18577	=HYPERLINK("http://flybase.org/reports/FBgn0037870", "LINK")	This gene is referred to in FlyBase by the symbol Dmel\CG18577 (FBgn0037870). It is a protein_coding_gene from Dmel. It has one annotated transcript and one polypeptide. Gene sequence location is 3R:11196092..11197285. Its molecular function is unknown. The biological processes in which it is involved are not known. 4 alleles are reported. No phenotypic data is available. The phenotypic class of …
FBgn0029922	0.65	0.78	0.87	0.95	1.07	1.16	-0.467797	0.0274209	0.689123		CG14431	=HYPERLINK("http://flybase.org/reports/FBgn0029922", "LINK")	This gene is referred to in FlyBase by the symbol Dmel\CG14431 (FBgn0029922). It is a protein_coding_gene from Dmel. It has 3 annotated transcripts and 3 polypeptides (2 unique). Gene sequence location is X:6908277..6968829. Its molecular function is unknown. The biological processes in which it is involved are not known. 7 alleles are reported. No phenotypic data is available. The phenotypic cla…
FBgn0015336	3.33	3.41	2.5	4.66	4.49	3.59	-0.46321	0.0166414	0.528772		CG15865	=HYPERLINK("http://flybase.org/reports/FBgn0015336", "LINK")	This gene is referred to in FlyBase by the symbol Dmel\CG15865 (FBgn0015336). It is a protein_coding_gene from Dmel. It has one annotated transcript and one polypeptide. Gene sequence location is X:16660898..16664455. Its molecular function is unknown. The biological processes in which it is involved are not known. 3 alleles are reported. No phenotypic data is available. The phenotypic class of a…
FBgn0026061	67.17	81.5	111.91	99.81	130.47	129.35	-0.462337	0.0150724	0.503691		Mipp1	=HYPERLINK("http://flybase.org/reports/FBgn0026061", "LINK")	The gene Multiple inositol polyphosphate phosphatase 1 is referred to in FlyBase by the symbol Dmel\Mipp1 (CG4123, FBgn0026061). It is a protein_coding_gene from Dmel. It has 3 annotated transcripts and 3 polypeptides (1 unique). Gene sequence location is 3L:16563448..16573334. Its molecular function is described by: bisphosphoglycerate 3-phosphatase activity; acid phosphatase activity; inositol …
FBgn0031902	4.26	4.45	5.38	5.88	7.15	6.4	-0.460884	0.00720878	0.328763		Wnt6	=HYPERLINK("http://flybase.org/reports/FBgn0031902", "LINK")	The gene Wnt oncogene analog 6 is referred to in FlyBase by the symbol Dmel\Wnt6 (CG4969, FBgn0031902). It is a protein_coding_gene from Dmel. It has 2 annotated transcripts and 2 polypeptides (1 unique). Gene sequence location is 2L:7333714..7352542. Its molecular function is described by: cytokine activity; frizzled binding; signaling receptor binding. It is involved in the biological process d…
FBgn0033661	0.96	0.53	0.87	1.07	1.13	1.05	-0.459928	0.0288434	0.701923		CG13185	=HYPERLINK("http://flybase.org/reports/FBgn0033661", "LINK")	This gene is referred to in FlyBase by the symbol Dmel\CG13185 (FBgn0033661). It is a protein_coding_gene from Dmel. It has one annotated transcript and one polypeptide. Gene sequence location is 2R:11867876..11885585. Its molecular function is described by: ATP binding; ATPase activity. It is involved in the biological process described with: rRNA processing; ribosomal large subunit assembly. 5 …
FBgn0266671	3.89	3.15	4.12	5.92	4.75	4.68	-0.458825	0.0174513	0.548803		Sec6	=HYPERLINK("http://flybase.org/reports/FBgn0266671", "LINK")	The gene Secretory 6 is referred to in FlyBase by the symbol Dmel\Sec6 (CG5341, FBgn0266671). It is a protein_coding_gene from Dmel. It has one annotated transcript and one polypeptide. Gene sequence location is 2R:18625249..18627718. Its molecular function is described by: SNARE binding. It is involved in the biological process described with 14 unique terms, many of which group under: columnar/…
FBgn0039873	67.14	69.16	82.35	101.5	100.12	99.24	-0.458489	0.000407041	0.0415653		Smvt	=HYPERLINK("http://flybase.org/reports/FBgn0039873", "LINK")	The gene Sodium-dependent multivitamin transporter is referred to in FlyBase by the symbol Dmel\Smvt (CG2191, FBgn0039873). It is a protein_coding_gene from Dmel. It has one annotated transcript and one polypeptide. Gene sequence location is 3R:31759404..31761579. Its molecular function is described by: symporter activity. It is involved in the biological process described with: sodium ion transp…
FBgn0038983	51.52	47.54	57.03	72.11	72.29	69.96	-0.455514	0.000314012	0.033813		CG5326	=HYPERLINK("http://flybase.org/reports/FBgn0038983", "LINK")	This gene is referred to in FlyBase by the symbol Dmel\CG5326 (FBgn0038983). It is a protein_coding_gene from Dmel. It has one annotated transcript and one polypeptide. Gene sequence location is 3R:22532174..22539919. Its molecular function is described by: fatty acid elongase activity. It is involved in the biological process described with 6 unique terms, many of which group under: membrane lip…
FBgn0085353	1489.05	775.97	947.91	1563.85	1442.42	1400.83	-0.4548	0.024514	0.653118		CG34324	=HYPERLINK("http://flybase.org/reports/FBgn0085353", "LINK")	This gene is referred to in FlyBase by the symbol Dmel\CG34324 (FBgn0085353). It is a protein_coding_gene from Dmel. It has one annotated transcript and one polypeptide. Gene sequence location is X:13456534..13457663. Its molecular function is described by: chitin binding. It is involved in the biological process described with: chitin metabolic process. 2 alleles are reported. No phenotypic data…
FBgn0263602	5.76	6.09	5.48	8.44	7.71	7.57	-0.452923	0.00448953	0.245122		Tasp1	=HYPERLINK("http://flybase.org/reports/FBgn0263602", "LINK")	The gene Taspase 1 is referred to in FlyBase by the symbol Dmel\Tasp1 (CG5241, FBgn0263602). It is a protein_coding_gene from Dmel. It has 2 annotated transcripts and 2 polypeptides (1 unique). Gene sequence location is 3L:16085221..16087525. Its molecular function is described by: threonine-type endopeptidase activity; endopeptidase activity. It is involved in the biological process described wi…
FBgn0000414	4.61	3.6	5.72	6.26	6.34	6.48	-0.451631	0.00850472	0.360312		Dab	=HYPERLINK("http://flybase.org/reports/FBgn0000414", "LINK")	The gene Disabled is referred to in FlyBase by the symbol Dmel\Dab (CG9695, FBgn0000414). It is a protein_coding_gene from Dmel. It has 8 annotated transcripts and 8 polypeptides (all unique). Gene sequence location is 3L:16712126..16724575. Its molecular function is described by: sevenless binding; protein binding. It is involved in the biological process described with 7 unique terms, many of w…
FBgn0036896	4.51	3.63	5.87	6.58	6.04	6.55	-0.451572	0.013083	0.463163		wnd	=HYPERLINK("http://flybase.org/reports/FBgn0036896", "LINK")	The gene wallenda is referred to in FlyBase by the symbol Dmel\wnd (CG8789, FBgn0036896). It is a protein_coding_gene from Dmel. It has 4 annotated transcripts and 4 polypeptides (2 unique). Gene sequence location is 3L:19624406..19635783. Its molecular function is described by: protein kinase activity; ATP binding; MAP kinase kinase kinase activity. It is involved in the biological process descr…
FBgn0020378	1.56	1.28	1.82	2.24	2.3	1.83	-0.448955	0.0316311	0.723409		Sp1	=HYPERLINK("http://flybase.org/reports/FBgn0020378", "LINK")	The gene Sp1 is referred to in FlyBase by the symbol Dmel\Sp1 (CG1343, FBgn0020378). It is a protein_coding_gene from Dmel. It has 4 annotated transcripts and 4 polypeptides (all unique). Gene sequence location is X:9729648..9756369. Its molecular function is described by: DNA-binding transcription factor activity, RNA polymerase II-specific; DNA-binding transcription factor activity; RNA polymer…
FBgn0033464	19.07	13.36	16.75	23.8	22.08	21.35	-0.448123	0.0054456	0.28053		CG1441	=HYPERLINK("http://flybase.org/reports/FBgn0033464", "LINK")	This gene is referred to in FlyBase by the symbol Dmel\CG1441 (FBgn0033464). It is a protein_coding_gene from Dmel. It has 2 annotated transcripts and 2 polypeptides (1 unique). Gene sequence location is 2R:9899018..9903287. Its molecular function is described by: fatty-acyl-CoA reductase (alcohol-forming) activity. It is involved in the biological process described with: long-chain fatty-acyl-Co…
FBgn0039827	9.55	7.42	11.37	9.48	14.3	14.9	-0.44534	0.0311444	0.717675		CG1544	=HYPERLINK("http://flybase.org/reports/FBgn0039827", "LINK")	This gene is referred to in FlyBase by the symbol Dmel\CG1544 (FBgn0039827). It is a protein_coding_gene from Dmel. It has one annotated transcript and one polypeptide. Gene sequence location is 3R:31196916..31203722. Its molecular function is described by: oxoglutarate dehydrogenase (succinyl-transferring) activity; thiamine pyrophosphate binding. It is involved in the biological process describ…
FBgn0027341	11.57	10.74	11.89	15.99	14.65	15.88	-0.442016	0.000516471	0.0500525		Gfat1	=HYPERLINK("http://flybase.org/reports/FBgn0027341", "LINK")
FBgn0085382	1.38	1.03	1.19	1.7	1.56	1.64	-0.44023	0.0304101	0.712294		CG34353	=HYPERLINK("http://flybase.org/reports/FBgn0085382", "LINK")	This gene is referred to in FlyBase by the symbol Dmel\CG34353 (FBgn0085382). It is a protein_coding_gene from Dmel. It has 3 annotated transcripts and 3 polypeptides (2 unique). Gene sequence location is 3R:27767966..27905843. Its molecular function is described by: axon guidance receptor activity. It is involved in the biological process described with: synapse organization; homophilic cell adh…
FBgn0000504	4.4	4.96	7.31	6.12	8.58	7.94	-0.439784	0.0291619	0.701923		dsx	=HYPERLINK("http://flybase.org/reports/FBgn0000504", "LINK")	The gene doublesex is referred to in FlyBase by the symbol Dmel\dsx (CG11094, FBgn0000504). It is a protein_coding_gene from Dmel. It has 6 annotated transcripts and 6 polypeptides (3 unique). Gene sequence location is 3R:7924323..7967408. Its molecular function is described by 7 unique terms, many of which group under: transcription regulator activity; binding; DNA-binding transcription factor a…
FBgn0036824	209.47	219.77	295.7	236.27	373.24	375.03	-0.439107	0.0250172	0.660846		CG3902	=HYPERLINK("http://flybase.org/reports/FBgn0036824", "LINK")	This gene is referred to in FlyBase by the symbol Dmel\CG3902 (FBgn0036824). It is a protein_coding_gene from Dmel. It has one annotated transcript and one polypeptide. Gene sequence location is 3L:18893120..18898293. Its molecular function is described by: acyl-CoA dehydrogenase activity; flavin adenine dinucleotide binding. It is involved in the biological process described with: oxidation-redu…
FBgn0052451	15.36	14.87	19.93	21.12	22.72	24.08	-0.435333	0.00351761	0.208438		SPoCk	=HYPERLINK("http://flybase.org/reports/FBgn0052451", "LINK")	The gene Secretory Pathway Calcium atpase is referred to in FlyBase by the symbol Dmel\SPoCk (CG32451, FBgn0052451). It is a protein_coding_gene from Dmel. It has 8 annotated transcripts and 8 polypeptides (7 unique). Gene sequence location is 3L:22749444..22787631. Its molecular function is described by: ATP binding; manganese transmembrane transporter activity, phosphorylative mechanism; proton…
FBgn0002891	1.32	1.1	1.74	2.16	1.78	1.69	-0.435184	0.0381469	0.78454		mus205	=HYPERLINK("http://flybase.org/reports/FBgn0002891", "LINK")	The gene DNA polymerase zeta subunit 1 is referred to in FlyBase by the symbol Dmel\PolZ1 (CG1925, FBgn0002891). It is a protein_coding_gene from Dmel. It has one annotated transcript and one polypeptide. Gene sequence location is 2R:7793625..7801044. Its molecular function is described by: nucleotide binding; DNA-directed DNA polymerase activity; DNA binding; protein binding. It is involved in t…
FBgn0033065	78.24	102.66	82.61	156.46	104.03	96.17	-0.434451	0.023587	0.642936		Cyp6w1	=HYPERLINK("http://flybase.org/reports/FBgn0033065", "LINK")	The gene Cyp6w1 is referred to in FlyBase by the symbol Dmel\Cyp6w1 (CG8345, FBgn0033065). It is a protein_coding_gene from Dmel. It has 2 annotated transcripts and 2 polypeptides (1 unique). Gene sequence location is 2R:6173684..6176195. Its molecular function is described by: heme binding; oxidoreductase activity, acting on paired donors, with incorporation or reduction of molecular oxygen; iro…
FBgn0034697	14.11	9.6	12.75	16.25	16.49	16.5	-0.430602	0.00821065	0.350728		GM130	=HYPERLINK("http://flybase.org/reports/FBgn0034697", "LINK")	The gene Golgi matrix protein 130 kD is referred to in FlyBase by the symbol Dmel\GM130 (CG11061, FBgn0034697). It is a protein_coding_gene from Dmel. It has one annotated transcript and one polypeptide. Gene sequence location is 2R:22124567..22127502. Its molecular function is described by: Rab GTPase binding. It is involved in the biological process described with: positive regulation of dendri…
FBgn0003042	2.66	2.66	2.83	4.14	3.07	3.75	-0.429207	0.0323476	0.730772		Pc	=HYPERLINK("http://flybase.org/reports/FBgn0003042", "LINK")	The gene Polycomb is referred to in FlyBase by the symbol Dmel\Pc (CG32443, FBgn0003042). It is a protein_coding_gene from Dmel. It has one annotated transcript and one polypeptide. Gene sequence location is 3L:21306138..21318020. Its molecular function is described by: sequence-specific DNA binding; methylated histone binding; DNA binding; chromatin binding; protein binding. It is involved in th…
FBgn0034716	32.3	20.94	28.14	38.58	34.81	36.24	-0.42769	0.00978235	0.400225		Oatp58Dc	=HYPERLINK("http://flybase.org/reports/FBgn0034716", "LINK")	The gene Organic anion transporting polypeptide 58Dc is referred to in FlyBase by the symbol Dmel\Oatp58Dc (CG3380, FBgn0034716). It is a protein_coding_gene from Dmel. It has 3 annotated transcripts and 3 polypeptides (1 unique). Gene sequence location is 2R:22223681..22228574. Its molecular function is described by: transmembrane transporter activity; sodium-independent organic anion transmembr…
FBgn0029905	4.24	3.54	3.86	5.47	5.55	4.66	-0.427163	0.0158283	0.515618		Nf-YC	=HYPERLINK("http://flybase.org/reports/FBgn0029905", "LINK")	The gene Nuclear factor Y-box C is referred to in FlyBase by the symbol Dmel\Nf-YC (CG3075, FBgn0029905). It is a protein_coding_gene from Dmel. It has one annotated transcript and one polypeptide. Gene sequence location is X:6818178..6820919. Its molecular function is described by: RNA polymerase II cis-regulatory region sequence-specific DNA binding; protein heterodimerization activity; DNA-bin…
FBgn0027562	26.59	24.22	28.87	37.78	34.77	34.54	-0.424715	0.00116761	0.0947907		CG10345	=HYPERLINK("http://flybase.org/reports/FBgn0027562", "LINK")	This gene is referred to in FlyBase by the symbol Dmel\CG10345 (FBgn0027562). It is a protein_coding_gene from Dmel. It has one annotated transcript and one polypeptide. Gene sequence location is 3R:16597073..16604861. Its molecular function is unknown. The biological processes in which it is involved are not known. 10 alleles are reported. No phenotypic data is available. The phenotypic classes …
FBgn0027518	3.92	4.28	5.25	5.83	5.41	6.8	-0.423633	0.0203801	0.592896		Wdr24	=HYPERLINK("http://flybase.org/reports/FBgn0027518", "LINK")	The gene WD repeat domain 24 is referred to in FlyBase by the symbol Dmel\Wdr24 (CG7609, FBgn0027518). It is a protein_coding_gene from Dmel. It has 2 annotated transcripts and 2 polypeptides (all unique). Gene sequence location is 3R:29741972..29745092. Its molecular function is unknown. It is involved in the biological process described with 7 unique terms, many of which group under: cellular m…
FBgn0039872	29.59	34.67	46.38	42.95	48.36	57.28	-0.423256	0.0208541	0.60329		salt	=HYPERLINK("http://flybase.org/reports/FBgn0039872", "LINK")	The gene salty dog is referred to in FlyBase by the symbol Dmel\salt (CG2196, FBgn0039872). It is a protein_coding_gene from Dmel. It has 2 annotated transcripts and 2 polypeptides (all unique). Gene sequence location is 3R:31751825..31754705. Its molecular function is described by: symporter activity. It is involved in the biological process described with: transmembrane transport; sodium ion tr…
FBgn0267792	2.67	2.8	2.69	3.51	3.74	3.65	-0.416266	0.00885625	0.369737		rgr	=HYPERLINK("http://flybase.org/reports/FBgn0267792", "LINK")	The gene regular is referred to in FlyBase by the symbol Dmel\rgr (CG8643, FBgn0267792). It is a protein_coding_gene from Dmel. It has 2 annotated transcripts and 2 polypeptides (all unique). Gene sequence location is 2R:8600415..8612295. Its molecular function is described by: nucleic acid binding; DNA-binding transcription factor activity. It is involved in the biological process described with…
FBgn0040322	18.77	26.85	19.97	27.68	30.44	29.44	-0.415137	0.0125989	0.455802		GNBP2	=HYPERLINK("http://flybase.org/reports/FBgn0040322", "LINK")	The gene Gram-negative bacteria binding protein 2 is referred to in FlyBase by the symbol Dmel\GNBP2 (CG4144, FBgn0040322). It is a protein_coding_gene from Dmel. It has 3 annotated transcripts and 3 polypeptides (all unique). Gene sequence location is 3L:18673474..18675413. Its molecular function is described by: pattern recognition receptor activity; lipopolysaccharide binding; (1->3)-beta-D-gl…
FBgn0263600	1.99	2	2.12	2.61	2.76	2.78	-0.415121	0.0242174	0.648558		DNApol-delta	=HYPERLINK("http://flybase.org/reports/FBgn0263600", "LINK")	The gene DNA polymerase delta subunit 1 is referred to in FlyBase by the symbol Dmel\PolD1 (CG5949, FBgn0263600). It is a protein_coding_gene from Dmel. It has one annotated transcript and one polypeptide. Gene sequence location is 3L:15984322..15987815. Its molecular function is described by: protein binding; DNA-directed DNA polymerase activity; DNA binding; nucleotide binding; 3'-5'-exodeoxyri…
FBgn0033968	15.6	12.25	12.58	17.09	19.9	17.12	-0.413811	0.0200187	0.591256		hui	=HYPERLINK("http://flybase.org/reports/FBgn0033968", "LINK")	The gene hase und igel is referred to in FlyBase by the symbol Dmel\hui (CG10200, FBgn0033968). It is a protein_coding_gene from Dmel. It has 2 annotated transcripts and 2 polypeptides (1 unique). Gene sequence location is 2R:14808419..14809931. Its molecular function is described by: . It is involved in the biological process described with: wing disc development. 6 alleles are reported. The phe…
FBgn0034644	18.3	15.53	19.4	26.9	22.07	22	-0.413479	0.00500382	0.261243		CG10082	=HYPERLINK("http://flybase.org/reports/FBgn0034644", "LINK")	This gene is referred to in FlyBase by the symbol Dmel\CG10082 (FBgn0034644). It is a protein_coding_gene from Dmel. It has 2 annotated transcripts and 2 polypeptides (all unique). Gene sequence location is 2R:21646177..21657935. Its molecular function is described by: inositol hexakisphosphate kinase activity; kinase activity. It is involved in the biological process described with: phosphatidyl…
FBgn0086677	1.32	0.89	1.11	1.6	1.29	1.55	-0.412652	0.0331804	0.740281		jeb	=HYPERLINK("http://flybase.org/reports/FBgn0086677", "LINK")	The gene jelly belly is referred to in FlyBase by the symbol Dmel\jeb (CG30040, FBgn0086677). It is a protein_coding_gene from Dmel. It has 2 annotated transcripts and 2 polypeptides (1 unique). Gene sequence location is 2R:12085194..12119340. Its molecular function is described by: receptor ligand activity; transmembrane receptor protein tyrosine kinase activator activity. It is involved in the …
FBgn0029708	4.71	3.91	4.88	6.68	5.49	5.8	-0.411164	0.0114179	0.439156		CG3556	=HYPERLINK("http://flybase.org/reports/FBgn0029708", "LINK")	This gene is referred to in FlyBase by the symbol Dmel\CG3556 (FBgn0029708). It is a protein_coding_gene from Dmel. It has 2 annotated transcripts and 2 polypeptides (1 unique). Gene sequence location is X:4530231..4535464. Its molecular function is described by: cobalamin binding. It is involved in the biological process described with: cobalamin transport. 7 alleles are reported. No phenotypic …
FBgn0264907	3.49	3.26	4.48	4.19	5.52	5.25	-0.409307	0.0239331	0.646944		CG44098	=HYPERLINK("http://flybase.org/reports/FBgn0264907", "LINK")	This gene is referred to in FlyBase by the symbol Dmel\CG44098 (FBgn0264907). It is a protein_coding_gene from Dmel. It has 4 annotated transcripts and 4 polypeptides (3 unique). Gene sequence location is 3R:4750409..4773197. Its molecular function is described by: transmembrane transporter activity. It is involved in the biological process described with: transmembrane transport. 9 alleles are r…
FBgn0051663	13.57	11.19	16.75	17.11	20.07	18.03	-0.409065	0.0138918	0.478702		CG31663	=HYPERLINK("http://flybase.org/reports/FBgn0051663", "LINK")	This gene is referred to in FlyBase by the symbol Dmel\CG31663 (FBgn0051663). It is a protein_coding_gene from Dmel. It has 3 annotated transcripts and 3 polypeptides (2 unique). Gene sequence location is 2L:1858609..1881480. Its molecular function is unknown. The biological processes in which it is involved are not known. 8 alleles are reported. No phenotypic data is available. The phenotypic cl…
FBgn0052170	10.84	7.05	8.06	13.3	11.19	10.04	-0.408139	0.0353178	0.764858		CG32170	=HYPERLINK("http://flybase.org/reports/FBgn0052170", "LINK")	This gene is referred to in FlyBase by the symbol Dmel\CG32170 (FBgn0052170). It is a protein_coding_gene from Dmel. It has one annotated transcript and one polypeptide. Gene sequence location is 3L:16877309..16879372. Its molecular function is described by: . It is involved in the biological process described with: . 2 alleles are reported. No phenotypic data is available. The phenotypic class o…
FBgn0038079	4.82	4.66	4.09	5.32	6.97	5.8	-0.407325	0.0496111	0.866631		NijC	=HYPERLINK("http://flybase.org/reports/FBgn0038079", "LINK")	The gene Ninjurin C is referred to in FlyBase by the symbol Dmel\NijC (CG14394, FBgn0038079). It is a protein_coding_gene from Dmel. It has 6 annotated transcripts and 6 polypeptides (all unique). Gene sequence location is 3R:12695129..12697379. Its molecular function is unknown. It is involved in the biological process described with: cell adhesion; tissue regeneration. 7 alleles are reported. N…
FBgn0034292	111.02	103.49	107.29	149.46	127.17	150.62	-0.4069	0.00155867	0.117897		CG5767	=HYPERLINK("http://flybase.org/reports/FBgn0034292", "LINK")	This gene is referred to in FlyBase by the symbol Dmel\CG5767 (FBgn0034292). It is a protein_coding_gene from Dmel. It has one annotated transcript and one polypeptide. Gene sequence location is 2R:18046386..18047484. Its molecular function is unknown. The biological processes in which it is involved are not known. 4 alleles are reported. No phenotypic data is available. The phenotypic class of a…
FBgn0036995	2.58	1.66	2.36	2.62	3.04	3.12	-0.406422	0.0392075	0.791057		atk	=HYPERLINK("http://flybase.org/reports/FBgn0036995", "LINK")	The gene artichoke is referred to in FlyBase by the symbol Dmel\atk (CG5195, FBgn0036995). It is a protein_coding_gene from Dmel. It has 3 annotated transcripts and 3 polypeptides (1 unique). Gene sequence location is 3L:20454690..20464862. Its molecular function is unknown. It is involved in the biological process described with: locomotion; cilium assembly; sensory organ development. 10 alleles…
FBgn0001147	2.51	2.73	2.32	3.45	3.47	3.1	-0.403701	0.0462159	0.845524		gsb-n	=HYPERLINK("http://flybase.org/reports/FBgn0001147", "LINK")	The gene gooseberry-neuro is referred to in FlyBase by the symbol Dmel\gsb-n (CG2692, FBgn0001147). It is a protein_coding_gene from Dmel. It has one annotated transcript and one polypeptide. Gene sequence location is 2R:25040383..25052331. Its molecular function is described by: RNA polymerase II transcription regulatory region sequence-specific DNA binding; RNA polymerase II cis-regulatory regi…
FBgn0038422	4.5	3.27	4.84	5.64	5.55	5.48	-0.399713	0.0326462	0.73364		CG14880	=HYPERLINK("http://flybase.org/reports/FBgn0038422", "LINK")	This gene is referred to in FlyBase by the symbol Dmel\CG14880 (FBgn0038422). It is a protein_coding_gene from Dmel. It has 2 annotated transcripts and 2 polypeptides (1 unique). Gene sequence location is 3R:16360329..16368306. Its molecular function is described by: chitin binding. It is involved in the biological process described with: chitin metabolic process. 5 alleles are reported. No pheno…
FBgn0024184	1.89	2.43	2.28	2.93	2.9	2.88	-0.398833	0.0428284	0.818862		unc-4	=HYPERLINK("http://flybase.org/reports/FBgn0024184", "LINK")	The gene unc-4 is referred to in FlyBase by the symbol Dmel\unc-4 (CG6269, FBgn0024184). It is a protein_coding_gene from Dmel. It has 3 annotated transcripts and 3 polypeptides (2 unique). Gene sequence location is X:17768569..17778708. Its molecular function is described by: sequence-specific DNA binding. It is involved in the biological process described with: regulation of transcription, DNA-…
FBgn0032684	20.62	33.86	27.2	35.67	38.81	33.23	-0.396823	0.0287082	0.701923		CG10178	=HYPERLINK("http://flybase.org/reports/FBgn0032684", "LINK")	The gene UDP-glycosyltransferase family 301 member D1 is referred to in FlyBase by the symbol Dmel\Ugt301D1 (CG10178, FBgn0032684). It is a protein_coding_gene from Dmel. It has 2 annotated transcripts and 2 polypeptides (1 unique). Gene sequence location is 2L:18509560..18513512. Its molecular function is described by: transferase activity, transferring hexosyl groups. The biological processes i…
FBgn0038391	7.64	6.53	5.72	9.66	9.54	7.03	-0.396606	0.027195	0.684554		GATAe	=HYPERLINK("http://flybase.org/reports/FBgn0038391", "LINK")	The gene GATAe is referred to in FlyBase by the symbol Dmel\GATAe (CG10278, FBgn0038391). It is a protein_coding_gene from Dmel. It has 3 annotated transcripts and 3 polypeptides (2 unique). Gene sequence location is 3R:16009105..16019133. Its molecular function is described by: DNA-binding transcription factor activity, RNA polymerase II-specific; zinc ion binding; RNA polymerase II cis-regulato…
FBgn0260794	19.07	13.87	24.26	24.63	25.21	25.54	-0.396491	0.0291564	0.701923		ctrip	=HYPERLINK("http://flybase.org/reports/FBgn0260794", "LINK")	The gene circadian trip is referred to in FlyBase by the symbol Dmel\ctrip (CG42574, FBgn0260794). It is a protein_coding_gene from Dmel. It has 11 annotated transcripts and 11 polypeptides (9 unique). Gene sequence location is 3R:4786284..4812096. Its molecular function is described by: ubiquitin-protein transferase activity; ubiquitin protein ligase activity; zinc ion binding. It is involved in…
FBgn0037490	13.52	11.51	11.72	15.89	17.63	14.98	-0.395338	0.0183109	0.564471		CG10053	=HYPERLINK("http://flybase.org/reports/FBgn0037490", "LINK")	This gene is referred to in FlyBase by the symbol Dmel\CG10053 (FBgn0037490). It is a protein_coding_gene from Dmel. It has 2 annotated transcripts and 2 polypeptides (1 unique). Gene sequence location is 3R:7247090..7248140. Its molecular function is described by: nucleic acid binding. The biological processes in which it is involved are not known. 5 alleles are reported. No phenotypic data is a…
FBgn0030218	9.69	9.3	9.1	11.92	12.46	12.56	-0.391818	0.00569833	0.292577		CG1628	=HYPERLINK("http://flybase.org/reports/FBgn0030218", "LINK")	This gene is referred to in FlyBase by the symbol Dmel\CG1628 (FBgn0030218). It is a protein_coding_gene from Dmel. It has 2 annotated transcripts and 2 polypeptides (all unique). Gene sequence location is X:10598146..10602714. Its molecular function is described by: L-ornithine transmembrane transporter activity; amino acid transmembrane transporter activity. It is involved in the biological pro…
FBgn0265575	7.14	5.71	5.65	8.25	8.33	7.76	-0.39173	0.0121318	0.451118		yin	=HYPERLINK("http://flybase.org/reports/FBgn0265575", "LINK")	The gene yin is referred to in FlyBase by the symbol Dmel\yin (CG44402, FBgn0265575). It is a protein_coding_gene from Dmel. It has 4 annotated transcripts and 4 polypeptides (all unique). Gene sequence location is X:3862966..3871939. Its molecular function is described by: proton-dependent oligopeptide secondary active transmembrane transporter activity; oligopeptide transmembrane transporter ac…
FBgn0030612	12.3	10.89	16.81	14.3	19	19.27	-0.391676	0.0435663	0.826545		CG5599	=HYPERLINK("http://flybase.org/reports/FBgn0030612", "LINK")	The gene Dihydrolipoamide branched chain transacylase E2 is referred to in FlyBase by the symbol Dmel\Dbct (CG5599, FBgn0030612). It is a protein_coding_gene from Dmel. It has one annotated transcript and one polypeptide. Gene sequence location is X:15086125..15088629. Its molecular function is described by: lipoic acid binding; acetyltransferase activity. The biological processes in which it is …
FBgn0032330	4.02	3.06	4.69	5.51	4.6	5.33	-0.390379	0.0298358	0.707047		Samuel	=HYPERLINK("http://flybase.org/reports/FBgn0032330", "LINK")	The gene SAM-motif ubiquitously expressed punctatedly localized protein is referred to in FlyBase by the symbol Dmel\Samuel (CG31868, FBgn0032330). It is a protein_coding_gene from Dmel. It has 4 annotated transcripts and 4 polypeptides (2 unique). Gene sequence location is 2L:11013206..11066998. Its molecular function is described by: chromatin binding; histone binding. It is involved in the bio…
FBgn0033653	11.79	12.73	10.92	14.94	14.82	16.71	-0.389087	0.0122908	0.451382		CG13192	=HYPERLINK("http://flybase.org/reports/FBgn0033653", "LINK")	This gene is referred to in FlyBase by the symbol Dmel\CG13192 (FBgn0033653). It is a protein_coding_gene from Dmel. It has one annotated transcript and one polypeptide. Gene sequence location is 2R:11825345..11827097. Its molecular function is described by: . It is involved in the biological process described with: social behavior. 5 alleles are reported. No phenotypic data is available. The phe…
FBgn0034717	19.94	21.31	22.18	28.81	28.43	25.93	-0.388984	0.00196727	0.143214		CG5819	=HYPERLINK("http://flybase.org/reports/FBgn0034717", "LINK")	This gene is referred to in FlyBase by the symbol Dmel\CG5819 (FBgn0034717). It is a protein_coding_gene from Dmel. It has 3 annotated transcripts and 3 polypeptides (1 unique). Gene sequence location is 2R:22293400..22296955. Its molecular function is unknown. The biological processes in which it is involved are not known. 8 alleles are reported. No phenotypic data is available. The phenotypic c…
FBgn0051077	9.38	15.13	12.68	12.98	17.79	17.99	-0.388499	0.0489244	0.862014		CG31077	=HYPERLINK("http://flybase.org/reports/FBgn0051077", "LINK")	This gene is referred to in FlyBase by the symbol Dmel\CG31077 (FBgn0051077). It is a protein_coding_gene from Dmel. It has one annotated transcript and one polypeptide. Gene sequence location is 3R:26999752..27002961. Its molecular function is described by: chitin binding. It is involved in the biological process described with: chitin metabolic process. 6 alleles are reported. No phenotypic dat…
FBgn0002643	3.33	3.04	4.39	4.82	4.27	5	-0.387567	0.0216666	0.61815		mam	=HYPERLINK("http://flybase.org/reports/FBgn0002643", "LINK")	The gene mastermind is referred to in FlyBase by the symbol Dmel\mam (CG8118, FBgn0002643). It is a protein_coding_gene from Dmel. It has 4 annotated transcripts and 4 polypeptides (2 unique). Gene sequence location is 2R:13991203..14060356. Its molecular function is described by: transcription coactivator activity. It is involved in the biological process described with 16 unique terms, many of …
FBgn0031925	49.78	57.92	61.52	68.82	78.06	74.78	-0.387293	0.0042945	0.240399		Cyp4d21	=HYPERLINK("http://flybase.org/reports/FBgn0031925", "LINK")	The gene Cyp4d21 is referred to in FlyBase by the symbol Dmel\Cyp4d21 (CG6730, FBgn0031925). It is a protein_coding_gene from Dmel. It has one annotated transcript and one polypeptide. Gene sequence location is 2L:7605600..7607701. Its molecular function is described by: heme binding; oxidoreductase activity, acting on paired donors, with incorporation or reduction of molecular oxygen; iron ion b…
FBgn0039644	10.71	7.39	10.11	13.13	12.07	11.7	-0.385661	0.0178045	0.554372		rdog	=HYPERLINK("http://flybase.org/reports/FBgn0039644", "LINK")	The gene red dog mine is referred to in FlyBase by the symbol Dmel\rdog (CG11897, FBgn0039644). It is a protein_coding_gene from Dmel. It has 2 annotated transcripts and 2 polypeptides (1 unique). Gene sequence location is 3R:29158122..29164966. Its molecular function is described by: ATP binding; ATPase activity; ATPase-coupled transmembrane transporter activity. It is involved in the biological…
FBgn0004646	16.53	16.52	21.94	22.32	24.34	25.17	-0.383474	0.0118367	0.444408		ogre	=HYPERLINK("http://flybase.org/reports/FBgn0004646", "LINK")	The gene optic ganglion reduced is referred to in FlyBase by the symbol Dmel\ogre (CG3039, FBgn0004646). It is a protein_coding_gene from Dmel. It has 6 annotated transcripts and 6 polypeptides (1 unique). Gene sequence location is X:6973620..6991318. Its molecular function is described by: gap junction channel activity. It is involved in the biological process described with: phototransduction; …
FBgn0261004	4.93	3.62	3.44	5.34	5.35	4.98	-0.381653	0.0374121	0.779252		asl	=HYPERLINK("http://flybase.org/reports/FBgn0261004", "LINK")	The gene asterless is referred to in FlyBase by the symbol Dmel\asl (CG2919, FBgn0261004). It is a protein_coding_gene from Dmel. It has one annotated transcript and one polypeptide. Gene sequence location is 3R:5603236..5606543. Its molecular function is described by: protein binding. It is involved in the biological process described with 7 unique terms, many of which group under: multi-organis…
FBgn0024944	1.4	1.35	1.72	1.84	1.87	2.11	-0.379212	0.0445162	0.833658		Oamb	=HYPERLINK("http://flybase.org/reports/FBgn0024944", "LINK")	The gene Octopamine receptor in mushroom bodies is referred to in FlyBase by the symbol Dmel\Oamb (CG3856, FBgn0024944). It is a protein_coding_gene from Dmel. It has 6 annotated transcripts and 6 polypeptides (5 unique). Gene sequence location is 3R:20689018..20714577. Its molecular function is described by: octopamine receptor activity; G protein-coupled amine receptor activity; G protein-coupl…
FBgn0025525	7.55	5.89	7.42	10.2	8.52	8.38	-0.375514	0.016842	0.532315		bab2	=HYPERLINK("http://flybase.org/reports/FBgn0025525", "LINK")	The gene bric a brac 2 is referred to in FlyBase by the symbol Dmel\bab2 (CG9102, FBgn0025525). It is a protein_coding_gene from Dmel. It has 2 annotated transcripts and 2 polypeptides (all unique). Gene sequence location is 3L:1140429..1177276. Its molecular function is described by: minor groove of adenine-thymine-rich DNA binding; protein binding; DNA-binding transcription factor activity. It …
FBgn0027596	7.8	6.67	9.75	9.75	10.8	10.9	-0.374975	0.0194644	0.586209		Kank	=HYPERLINK("http://flybase.org/reports/FBgn0027596", "LINK")	The gene Kank is referred to in FlyBase by the symbol Dmel\Kank (CG10249, FBgn0027596). It is a protein_coding_gene from Dmel. It has 9 annotated transcripts and 9 polypeptides (all unique). Gene sequence location is 2R:14901475..14928425. Its molecular function is described by: microtubule plus-end binding. It is involved in the biological process described with: negative regulation of actin fil…
FBgn0036191	3.09	3.57	4.33	4.69	4.98	4.58	-0.373501	0.0327358	0.73459		Sugb	=HYPERLINK("http://flybase.org/reports/FBgn0036191", "LINK")	The gene Sugar baby is referred to in FlyBase by the symbol Dmel\Sugb (CG7334, FBgn0036191). It is a protein_coding_gene from Dmel. It has 3 annotated transcripts and 3 polypeptides (all unique). Gene sequence location is 3L:11683980..11690155. Its molecular function is unknown. It is involved in the biological process described with: determination of adult lifespan. 14 alleles are reported. No p…
FBgn0010403	51.98	47.53	32.13	55.91	55.9	59.11	-0.372807	0.0439678	0.82839		Obp83b	=HYPERLINK("http://flybase.org/reports/FBgn0010403", "LINK")	The gene Odorant-binding protein 83b is referred to in FlyBase by the symbol Dmel\Obp83b (CG11422, FBgn0010403). It is a protein_coding_gene from Dmel. It has one annotated transcript and one polypeptide. Gene sequence location is 3R:5976177..5976817. Its molecular function is described by: odorant binding. It is involved in the biological process described with: sensory perception of chemical st…
FBgn0031345	16.18	13.6	13.38	19.49	18.89	17.68	-0.372798	0.0330367	0.73926		CG18132	=HYPERLINK("http://flybase.org/reports/FBgn0031345", "LINK")	This gene is referred to in FlyBase by the symbol Dmel\CG18132 (FBgn0031345). It is a protein_coding_gene from Dmel. It has one annotated transcript and one polypeptide. Gene sequence location is 2L:1516795..1517478. Its molecular function is unknown. It is involved in the biological process described with: cell redox homeostasis; apoptotic cell clearance. 3 alleles are reported. No phenotypic da…
FBgn0037323	8.54	9.93	9.31	9.56	12.38	14.07	-0.371566	0.0427185	0.817929		CG2663	=HYPERLINK("http://flybase.org/reports/FBgn0037323", "LINK")	This gene is referred to in FlyBase by the symbol Dmel\CG2663 (FBgn0037323). It is a protein_coding_gene from Dmel. It has 2 annotated transcripts and 2 polypeptides (1 unique). Gene sequence location is 3R:5400594..5404135. Its molecular function is described by: phosphatidylinositol bisphosphate binding. The biological processes in which it is involved are not known. 3 alleles are reported. No …
FBgn0261547	8.42	7.65	11.62	10.77	12.1	12.98	-0.371226	0.0315837	0.723393		Exn	=HYPERLINK("http://flybase.org/reports/FBgn0261547", "LINK")	The gene Ephexin is referred to in FlyBase by the symbol Dmel\Exn (CG42665, FBgn0261547). It is a protein_coding_gene from Dmel. It has 5 annotated transcripts and 5 polypeptides (2 unique). Gene sequence location is 3L:16970013..16994388. Its molecular function is described by: Rho guanyl-nucleotide exchange factor activity. It is involved in the biological process described with: positive regul…
FBgn0036830	8.77	6.65	8.69	9.66	10.6	10.97	-0.369966	0.0199191	0.591256		CG14077	=HYPERLINK("http://flybase.org/reports/FBgn0036830", "LINK")	This gene is referred to in FlyBase by the symbol Dmel\CG14077 (FBgn0036830). It is a protein_coding_gene from Dmel. It has 2 annotated transcripts and 2 polypeptides (1 unique). Gene sequence location is 3L:18908260..18914150. Its molecular function is described by: enzyme regulator activity; cytochrome-c oxidase activity. It is involved in the biological process described with: aerobic respirat…
FBgn0039594	32.21	28.88	35.47	40.9	42.37	41.61	-0.369014	0.00364661	0.214997		snu	=HYPERLINK("http://flybase.org/reports/FBgn0039594", "LINK")	The gene snustorr is referred to in FlyBase by the symbol Dmel\snu (CG9990, FBgn0039594). It is a protein_coding_gene from Dmel. It has 6 annotated transcripts and 6 polypeptides (all unique). Gene sequence location is 3R:28675041..28695939. Its molecular function is described by: ATPase activity; ATP binding. It is involved in the biological process described with: transmembrane transport; cutic…
FBgn0030065	3.44	2.84	3.66	4.17	4.74	3.95	-0.368962	0.0268281	0.679892		CG12075	=HYPERLINK("http://flybase.org/reports/FBgn0030065", "LINK")	This gene is referred to in FlyBase by the symbol Dmel\CG12075 (FBgn0030065). It is a protein_coding_gene from Dmel. It has 5 annotated transcripts and 5 polypeptides (2 unique). Gene sequence location is X:8838323..8872774. Its molecular function is unknown. The biological processes in which it is involved are not known. 8 alleles are reported. No phenotypic data is available. The phenotypic cla…
FBgn0014417	6.35	6.26	7.14	8.05	8.83	8.64	-0.367713	0.012684	0.457392		CG13397	=HYPERLINK("http://flybase.org/reports/FBgn0014417", "LINK")	This gene is referred to in FlyBase by the symbol Dmel\CG13397 (FBgn0014417). It is a protein_coding_gene from Dmel. It has 2 annotated transcripts and 2 polypeptides (1 unique). Gene sequence location is 2L:8408888..8411868. Its molecular function is described by: alpha-N-acetylglucosaminidase activity. The biological processes in which it is involved are not known. 11 alleles are reported. No p…
FBgn0035266	30.17	28.32	35.34	41.61	39.26	40.2	-0.365987	0.00609807	0.304041		Gk2	=HYPERLINK("http://flybase.org/reports/FBgn0035266", "LINK")	The gene Glycerol kinase 2 is referred to in FlyBase by the symbol Dmel\Gk2 (CG7995, FBgn0035266). It is a protein_coding_gene from Dmel. It has 6 annotated transcripts and 6 polypeptides (1 unique). Gene sequence location is 3L:1738407..1745421. Its molecular function is described by: glycerol kinase activity; phosphotransferase activity, alcohol group as acceptor. It is involved in the biologic…
FBgn0034606	5.93	4.59	6.77	8.06	7.2	7.03	-0.365199	0.0305731	0.715032		ASPP	=HYPERLINK("http://flybase.org/reports/FBgn0034606", "LINK")	The gene Ankyrin-repeat, SH3-domain, and Proline-rich-region containing Protein is referred to in FlyBase by the symbol Dmel\ASPP (CG18375, FBgn0034606). It is a protein_coding_gene from Dmel. It has 3 annotated transcripts and 3 polypeptides (all unique). Gene sequence location is 2R:21217856..21251150. Its molecular function is described by: p53 binding; protein tyrosine kinase activator activi…
FBgn0038337	13.78	13.76	17.08	17.62	19.99	19.86	-0.362846	0.0142397	0.486345		CG6125	=HYPERLINK("http://flybase.org/reports/FBgn0038337", "LINK")	This gene is referred to in FlyBase by the symbol Dmel\CG6125 (FBgn0038337). It is a protein_coding_gene from Dmel. It has 3 annotated transcripts and 3 polypeptides (2 unique). Gene sequence location is 3R:15402598..15407070. Its molecular function is described by: secondary active sulfate transmembrane transporter activity; anion:anion antiporter activity; sulfate transmembrane transporter acti…
FBgn0030766	2.37	2.06	2.84	3.13	3.1	3.13	-0.362745	0.0371577	0.779252		mthl1	=HYPERLINK("http://flybase.org/reports/FBgn0030766", "LINK")	The gene methuselah-like 1 is referred to in FlyBase by the symbol Dmel\mthl1 (CG4521, FBgn0030766). It is a protein_coding_gene from Dmel. It has 2 annotated transcripts and 2 polypeptides (1 unique). Gene sequence location is X:16640968..16650309. Its molecular function is described by: G protein-coupled receptor activity. It is involved in the biological process described with 11 unique terms,…
FBgn0039688	2.79	2.27	3.62	3.82	3.61	3.74	-0.362636	0.0450881	0.835018		Kul	=HYPERLINK("http://flybase.org/reports/FBgn0039688", "LINK")	The gene Kuzbanian-like is referred to in FlyBase by the symbol Dmel\Kul (CG1964, FBgn0039688). It is a protein_coding_gene from Dmel. It has 3 annotated transcripts and 3 polypeptides (2 unique). Gene sequence location is 3R:29725830..29735360. Its molecular function is described by: metalloendopeptidase activity. It is involved in the biological process described with: Notch signaling pathway; …
FBgn0029878	7.49	6.08	8.83	9.34	9.97	9.52	-0.361597	0.0269685	0.682176		Pat1	=HYPERLINK("http://flybase.org/reports/FBgn0029878", "LINK")	The gene Protein interacting with APP tail-1 is referred to in FlyBase by the symbol Dmel\Pat1 (CG10695, FBgn0029878). It is a protein_coding_gene from Dmel. It has 3 annotated transcripts and 3 polypeptides (2 unique). Gene sequence location is X:6590776..6596954. Its molecular function is unknown. It is involved in the biological process described with: pole plasm oskar mRNA localization; regul…
FBgn0027579	53.27	46.97	64.71	59.2	75.06	77.85	-0.360604	0.0261236	0.672877		mino	=HYPERLINK("http://flybase.org/reports/FBgn0027579", "LINK")	The gene minotaur is referred to in FlyBase by the symbol Dmel\mino (CG5508, FBgn0027579). It is a protein_coding_gene from Dmel. It has 4 annotated transcripts and 4 polypeptides (3 unique). Gene sequence location is 3R:27925191..27933077. Its molecular function is described by: glycerol-3-phosphate O-acyltransferase activity. It is involved in the biological process described with 6 unique term…
FBgn0050147	4.14	4.17	5.66	5.76	5.84	6.36	-0.360585	0.0394439	0.791224		Hil	=HYPERLINK("http://flybase.org/reports/FBgn0050147", "LINK")	The gene Hillarin is referred to in FlyBase by the symbol Dmel\Hil (CG30147, FBgn0050147). It is a protein_coding_gene from Dmel. It has 2 annotated transcripts and 2 polypeptides (1 unique). Gene sequence location is 2R:20606881..20618217. Its molecular function is described by: protein binding. The biological processes in which it is involved are not known. 9 alleles are reported. The phenotype…
FBgn0035101	13.22	8.6	12.51	15.17	15.42	13.51	-0.359089	0.0386585	0.789774		p130CAS	=HYPERLINK("http://flybase.org/reports/FBgn0035101", "LINK")	The gene p130CAS is referred to in FlyBase by the symbol Dmel\p130CAS (CG1212, FBgn0035101). It is a protein_coding_gene from Dmel. It has 5 annotated transcripts and 5 polypeptides (4 unique). Gene sequence location is 3L:152884..174517. Its molecular function is unknown. It is involved in the biological process described with 7 unique terms, many of which group under: cellular process; organell…
FBgn0040071	4.18	3.59	4.75	5.18	5.41	5.49	-0.359014	0.0221106	0.619975		tara	=HYPERLINK("http://flybase.org/reports/FBgn0040071", "LINK")	The gene taranis is referred to in FlyBase by the symbol Dmel\tara (CG6889, FBgn0040071). It is a protein_coding_gene from Dmel. It has 2 annotated transcripts and 2 polypeptides (all unique). Gene sequence location is 3R:16225651..16260329. Its molecular function is unknown. It is involved in the biological process described with: locomotor rhythm; sleep; wing disc dorsal/ventral pattern formati…
FBgn0036731	8.26	6.14	7.38	9.58	8.99	9.42	-0.35862	0.0302367	0.711457		CG6333	=HYPERLINK("http://flybase.org/reports/FBgn0036731", "LINK")	This gene is referred to in FlyBase by the symbol Dmel\CG6333 (FBgn0036731). It is a protein_coding_gene from Dmel. It has 2 annotated transcripts and 2 polypeptides (1 unique). Gene sequence location is 3L:17480129..17486230. Its molecular function is described by: . It is involved in the biological process described with: . 9 alleles are reported. No phenotypic data is available. The phenotypic…
FBgn0033204	11.91	12.11	10.42	15.71	14.21	14.18	-0.354985	0.0256255	0.668099		CG2065	=HYPERLINK("http://flybase.org/reports/FBgn0033204", "LINK")	This gene is referred to in FlyBase by the symbol Dmel\CG2065 (FBgn0033204). It is a protein_coding_gene from Dmel. It has 2 annotated transcripts and 2 polypeptides (1 unique). Gene sequence location is 2R:7663786..7665269. Its molecular function is described by: NADP-retinol dehydrogenase activity. The biological processes in which it is involved are not known. 3 alleles are reported. No phenot…
FBgn0011281	46.96	36.76	31.97	47.27	47.13	53.8	-0.353966	0.0339616	0.752757		Obp83a	=HYPERLINK("http://flybase.org/reports/FBgn0011281", "LINK")	The gene Odorant-binding protein 83a is referred to in FlyBase by the symbol Dmel\Obp83a (CG11421, FBgn0011281). It is a protein_coding_gene from Dmel. It has 3 annotated transcripts and 3 polypeptides (2 unique). Gene sequence location is 3R:5972155..5975245. Its molecular function is described by: odorant binding; pheromone binding. It is involved in the biological process described with: senso…
FBgn0038986	13.32	17.68	17.87	19.74	19.42	23.32	-0.353284	0.0341712	0.752757		sit	=HYPERLINK("http://flybase.org/reports/FBgn0038986", "LINK")	The gene stuck in traffic is referred to in FlyBase by the symbol Dmel\sit (CG5278, FBgn0038986). It is a protein_coding_gene from Dmel. It has one annotated transcript and one polypeptide. Gene sequence location is 3R:22558342..22562572. Its molecular function is described by: fatty acid elongase activity. It is involved in the biological process described with 9 unique terms, many of which grou…
FBgn0003301	3.97	3.59	5.46	5.27	5.83	5.56	-0.352669	0.0396897	0.794102		rut	=HYPERLINK("http://flybase.org/reports/FBgn0003301", "LINK")	The gene rutabaga is referred to in FlyBase by the symbol Dmel\rut (CG9533, FBgn0003301). It is a protein_coding_gene from Dmel. It has 7 annotated transcripts and 7 polypeptides (6 unique). Gene sequence location is X:14787478..14826073. Its molecular function is described by: adenylate cyclase activity; calcium- and calmodulin-responsive adenylate cyclase activity. It is involved in the biologi…
FBgn0032731	13	12.71	12.06	15.28	17.79	15.27	-0.352572	0.014955	0.501932		Swip-1	=HYPERLINK("http://flybase.org/reports/FBgn0032731", "LINK")	The gene Swiprosin-1 is referred to in FlyBase by the symbol Dmel\Swip-1 (CG10641, FBgn0032731). It is a protein_coding_gene from Dmel. It has 2 annotated transcripts and 2 polypeptides (1 unique). Gene sequence location is 2L:18977519..18987280. Its molecular function is described by: calcium ion binding. It is involved in the biological process described with: mesoderm development. 19 alleles a…
FBgn0082585	7.86	8.07	9.65	11.5	10.93	10.23	-0.351806	0.0198594	0.591256		sprt	=HYPERLINK("http://flybase.org/reports/FBgn0082585", "LINK")	The gene sprite is referred to in FlyBase by the symbol Dmel\sprt (CG30023, FBgn0082585). It is a protein_coding_gene from Dmel. It has one annotated transcript and one polypeptide. Gene sequence location is 2R:11384743..11397432. Its molecular function is described by: actin binding. The biological processes in which it is involved are not known. 10 alleles are reported. No phenotypic data is av…
FBgn0039040	22.54	32.32	29.84	34.65	38.67	34.88	-0.351773	0.0348066	0.758022		CG13833	=HYPERLINK("http://flybase.org/reports/FBgn0039040", "LINK")	This gene is referred to in FlyBase by the symbol Dmel\CG13833 (FBgn0039040). It is a protein_coding_gene from Dmel. It has one annotated transcript and one polypeptide. Gene sequence location is 3R:23033284..23035563. Its molecular function is described by: oxidoreductase activity, acting on the CH-OH group of donors, NAD or NADP as acceptor. The biological processes in which it is involved are …
FBgn0031800	23.6	19.88	24.08	26.21	31.15	28.82	-0.347973	0.0160032	0.520221		CG9497	=HYPERLINK("http://flybase.org/reports/FBgn0031800", "LINK")	This gene is referred to in FlyBase by the symbol Dmel\CG9497 (FBgn0031800). It is a protein_coding_gene from Dmel. It has 2 annotated transcripts and 2 polypeptides (1 unique). Gene sequence location is 2L:6346430..6348427. Its molecular function is unknown. The biological processes in which it is involved are not known. 5 alleles are reported. The phenotypes of these alleles manifest in: lipid …
FBgn0032348	3.41	2.79	3.97	4.62	4.39	3.94	-0.347886	0.0459992	0.844098		CG4751	=HYPERLINK("http://flybase.org/reports/FBgn0032348", "LINK")	This gene is referred to in FlyBase by the symbol Dmel\CG4751 (FBgn0032348). It is a protein_coding_gene from Dmel. It has one annotated transcript and one polypeptide. Gene sequence location is 2L:11130737..11136003. Its molecular function is described by: histone binding. It is involved in the biological process described with: ATP-dependent chromatin remodeling; positive regulation of transcri…
FBgn0000635	8.64	6.62	9.63	9.72	10.78	11.21	-0.347421	0.0308638	0.717503		Fas2	=HYPERLINK("http://flybase.org/reports/FBgn0000635", "LINK")	The gene Fasciclin 2 is referred to in FlyBase by the symbol Dmel\Fas2 (CG3665, FBgn0000635). It is a protein_coding_gene from Dmel. It has 7 annotated transcripts and 7 polypeptides (all unique). Gene sequence location is X:4132887..4206093. Its molecular function is described by: protein binding; cell-cell adhesion mediator activity. It is involved in the biological process described with 25 un…
FBgn0031826	30.72	26.17	28.66	34.31	38.27	36.5	-0.347203	0.0106833	0.41938		CG9550	=HYPERLINK("http://flybase.org/reports/FBgn0031826", "LINK")	This gene is referred to in FlyBase by the symbol Dmel\CG9550 (FBgn0031826). It is a protein_coding_gene from Dmel. It has one annotated transcript and one polypeptide. Gene sequence location is 2L:6497053..6498466. Its molecular function is described by: N-acetylglucosamine 6-O-sulfotransferase activity. It is involved in the biological process described with: sulfur compound metabolic process; …
FBgn0025643	3.58	3.19	4.03	4.72	4.62	4.42	-0.346608	0.0373437	0.779252		CG3588	=HYPERLINK("http://flybase.org/reports/FBgn0025643", "LINK")	This gene is referred to in FlyBase by the symbol Dmel\CG3588 (FBgn0025643). It is a protein_coding_gene from Dmel. It has 5 annotated transcripts and 5 polypeptides (4 unique). Gene sequence location is X:2919770..2924426. Its molecular function is described by: SH3 domain binding. The biological processes in which it is involved are not known. 4 alleles are reported. No phenotypic data is avail…
FBgn0262880	14.06	16.91	13.97	20.29	18.45	18.38	-0.346415	0.0485486	0.862014		CG43235	=HYPERLINK("http://flybase.org/reports/FBgn0262880", "LINK")	This gene is referred to in FlyBase by the symbol Dmel\CG43235 (FBgn0262880). It is a protein_coding_gene from Dmel. It has one annotated transcript and one polypeptide. Gene sequence location is 2L:7693030..7693821. Its molecular function is described by: carboxypeptidase activity. It is involved in the biological process described with: proteolysis. No alleles are reported.
FBgn0036935	6.66	5.97	5.18	8.04	7.6	7.04	-0.345057	0.0277781	0.694723		CG14186	=HYPERLINK("http://flybase.org/reports/FBgn0036935", "LINK")	This gene is referred to in FlyBase by the symbol Dmel\CG14186 (FBgn0036935). It is a protein_coding_gene from Dmel. It has one annotated transcript and one polypeptide. Gene sequence location is 3L:20098084..20103827. Its molecular function is unknown. It is involved in the biological process described with: cilium assembly. 5 alleles are reported. No phenotypic data is available. The phenotypic…
FBgn0011205	19.39	19.03	16.91	25.98	23	21.34	-0.343684	0.0126105	0.455802		fbl	=HYPERLINK("http://flybase.org/reports/FBgn0011205", "LINK")	The gene fumble is referred to in FlyBase by the symbol Dmel\fbl (CG5725, FBgn0011205). It is a protein_coding_gene from Dmel. It has 7 annotated transcripts and 7 polypeptides (6 unique). Gene sequence location is 3L:20384429..20391913. Its molecular function is described by: ATP binding; pantothenate kinase activity. It is involved in the biological process described with 14 unique terms, many …
FBgn0030425	32.06	46.81	42.22	44.14	52.47	57.28	-0.343141	0.0436505	0.826545		CG3775	=HYPERLINK("http://flybase.org/reports/FBgn0030425", "LINK")	The gene Neprilysin 6 is referred to in FlyBase by the symbol Dmel\Nep6 (CG3775, FBgn0030425). It is a protein_coding_gene from Dmel. It has 2 annotated transcripts and 2 polypeptides (1 unique). Gene sequence location is X:12801661..12804232. Its molecular function is described by: metalloendopeptidase activity. It is involved in the biological process described with: proteolysis. 3 alleles are …
FBgn0033395	15.16	15.89	18.43	20.45	20.94	21.36	-0.341377	0.0162796	0.524807		Cyp4p2	=HYPERLINK("http://flybase.org/reports/FBgn0033395", "LINK")	The gene Cyp4p2 is referred to in FlyBase by the symbol Dmel\Cyp4p2 (CG1944, FBgn0033395). It is a protein_coding_gene from Dmel. It has one annotated transcript and one polypeptide. Gene sequence location is 2R:9237512..9239831. Its molecular function is described by: oxidoreductase activity, acting on paired donors, with incorporation or reduction of molecular oxygen; heme binding; monooxygenas…
FBgn0000015	1.25	1.23	1.39	1.58	1.69	1.64	-0.340323	0.0261049	0.672877		Abd-B	=HYPERLINK("http://flybase.org/reports/FBgn0000015", "LINK")	The gene Abdominal B is referred to in FlyBase by the symbol Dmel\Abd-B (CG11648, FBgn0000015). It is a protein_coding_gene from Dmel. It has 10 annotated transcripts and 10 polypeptides (4 unique). Gene sequence location is 3R:16927212..16972236. Its molecular function is described by: DNA-binding transcription factor activity; RNA polymerase II cis-regulatory region sequence-specific DNA bindin…
FBgn0000547	4.29	3.97	5.25	5.77	5.68	5.67	-0.34001	0.0249251	0.659537		ed	=HYPERLINK("http://flybase.org/reports/FBgn0000547", "LINK")	The gene echinoid is referred to in FlyBase by the symbol Dmel\ed (CG12676, FBgn0000547). It is a protein_coding_gene from Dmel. It has 3 annotated transcripts and 3 polypeptides (2 unique). Gene sequence location is 2L:4031377..4115749. Its molecular function is described by: cell adhesion molecule binding; epidermal growth factor receptor binding; protein binding. It is involved in the biologic…
FBgn0046297	239.2	202.98	218.48	270.66	277.75	288.12	-0.338293	0.00534634	0.276335		lncRNA:CR9284	=HYPERLINK("http://flybase.org/reports/FBgn0046297", "LINK")	The gene long non-coding RNA:CR9284 is referred to in FlyBase by the symbol Dmel\lncRNA:CR9284 (CR9284, FBgn0046297). It is a non_protein_coding_gene from Dmel. It has 2 annotated transcripts. Gene sequence location is 2R:21803402..21804338. Its molecular function is unknown. The biological processes in which it is involved are not known. 3 alleles are reported. No phenotypic data is available. T…
FBgn0053233	12.63	9.69	12.86	15.26	15.4	13.9	-0.338094	0.0375169	0.779252		CG33233	=HYPERLINK("http://flybase.org/reports/FBgn0053233", "LINK")	This gene is referred to in FlyBase by the symbol Dmel\CG33233 (FBgn0053233). It is a protein_coding_gene from Dmel. It has 2 annotated transcripts and 2 polypeptides (all unique). Gene sequence location is 3L:2659639..2661501. Its molecular function is described by: transmembrane transporter activity. It is involved in the biological process described with: transmembrane transport. 3 alleles are…
FBgn0058006	10.27	12.18	12.63	15.36	15.37	13.57	-0.336078	0.0235008	0.642936		CG40006	=HYPERLINK("http://flybase.org/reports/FBgn0058006", "LINK")	This gene is referred to in FlyBase by the symbol Dmel\CG40006 (FBgn0058006). It is a protein_coding_gene from Dmel. It has one annotated transcript and one polypeptide. Gene sequence location is 2L:22622417..22756349. Its molecular function is unknown. The biological processes in which it is involved are not known. 3 alleles are reported. No phenotypic data is available. No phenotypic class data…
FBgn0031150	3.64	4.41	4.63	4.97	5.88	5.15	-0.334723	0.0342469	0.752757		bves	=HYPERLINK("http://flybase.org/reports/FBgn0031150", "LINK")	The gene bves is referred to in FlyBase by the symbol Dmel\bves (CG32513, FBgn0031150). It is a protein_coding_gene from Dmel. It has 4 annotated transcripts and 4 polypeptides (3 unique). Gene sequence location is X:21053963..21082391. Its molecular function is described by: cAMP binding. The biological processes in which it is involved are not known. 29 alleles are reported. No phenotypic data …
FBgn0261556	2.91	2.6	3.65	3.88	4.11	3.58	-0.334135	0.0389182	0.790912		CG42674	=HYPERLINK("http://flybase.org/reports/FBgn0261556", "LINK")	This gene is referred to in FlyBase by the symbol Dmel\CG42674 (FBgn0261556). It is a protein_coding_gene from Dmel. It has 7 annotated transcripts and 7 polypeptides (6 unique). Gene sequence location is 3L:20149614..20198317. Its molecular function is described by: Rho guanyl-nucleotide exchange factor activity. It is involved in the biological process described with: Rho protein signal transdu…
FBgn0036697	17.55	21.65	18.13	24.98	24.86	22.44	-0.332532	0.0198892	0.591256		rogdi	=HYPERLINK("http://flybase.org/reports/FBgn0036697", "LINK")	The gene rogdi is referred to in FlyBase by the symbol Dmel\rogdi (CG7725, FBgn0036697). It is a protein_coding_gene from Dmel. It has 2 annotated transcripts and 2 polypeptides (all unique). Gene sequence location is 3L:17049512..17055454. Its molecular function is described by: . It is involved in the biological process described with: vacuolar acidification; developmental process; behavioral r…
FBgn0036680	5.17	4.45	5.18	7	5.82	5.82	-0.332106	0.0443061	0.831733		Cpr73D	=HYPERLINK("http://flybase.org/reports/FBgn0036680", "LINK")	The gene Cuticular protein 73D is referred to in FlyBase by the symbol Dmel\Cpr73D (CG9665, FBgn0036680). It is a protein_coding_gene from Dmel. It has 2 annotated transcripts and 2 polypeptides (all unique). Gene sequence location is 3L:16939100..16957689. Its molecular function is described by: structural constituent of chitin-based larval cuticle; structural constituent of cuticle. It is invol…
FBgn0085370	7.33	5.27	8	9.09	8.46	8.38	-0.330489	0.0476211	0.856018		Pde11	=HYPERLINK("http://flybase.org/reports/FBgn0085370", "LINK")	The gene Phosphodiesterase 11 is referred to in FlyBase by the symbol Dmel\Pde11 (CG34341, FBgn0085370). It is a protein_coding_gene from Dmel. It has 6 annotated transcripts and 6 polypeptides (4 unique). Gene sequence location is 2L:18532025..18590342. Its molecular function is described by: 3',5'-cyclic-GMP phosphodiesterase activity; 3',5'-cyclic-AMP phosphodiesterase activity; 3',5'-cyclic-n…
FBgn0053110	28.25	25.57	22.58	36.62	30.27	29.28	-0.329879	0.0295136	0.70347		CG33110	=HYPERLINK("http://flybase.org/reports/FBgn0053110", "LINK")	This gene is referred to in FlyBase by the symbol Dmel\CG33110 (FBgn0053110). It is a protein_coding_gene from Dmel. It has one annotated transcript and one polypeptide. Gene sequence location is 3R:22570188..22580392. Its molecular function is described by: fatty acid elongase activity. It is involved in the biological process described with 6 unique terms, many of which group under: fatty acid …
FBgn0039227	4.11	3.83	4.51	5.61	5.18	4.83	-0.32732	0.0289875	0.701923		polybromo	=HYPERLINK("http://flybase.org/reports/FBgn0039227", "LINK")	The gene polybromo is referred to in FlyBase by the symbol Dmel\polybromo (CG11375, FBgn0039227). It is a protein_coding_gene from Dmel. It has one annotated transcript and one polypeptide. Gene sequence location is 3R:24799967..24805259. Its molecular function is described by: DNA translocase activity; lysine-acetylated histone binding; chromatin binding. It is involved in the biological process…
FBgn0083962	9.05	6.87	10.59	10.76	10.98	11.57	-0.3273	0.0496772	0.866631		CG34126	=HYPERLINK("http://flybase.org/reports/FBgn0083962", "LINK")	This gene is referred to in FlyBase by the symbol Dmel\CG34126 (FBgn0083962). It is a protein_coding_gene from Dmel. It has 5 annotated transcripts and 5 polypeptides (all unique). Gene sequence location is 2L:4981614..4992702. Its molecular function is described by: . It is involved in the biological process described with: . 8 alleles are reported. The phenotype of these alleles manifest in: tr…
FBgn0031117	25.02	32.08	27.25	32.84	36.32	36.8	-0.326981	0.0271704	0.684554		GstT3	=HYPERLINK("http://flybase.org/reports/FBgn0031117", "LINK")	The gene Glutathione S transferase T3 is referred to in FlyBase by the symbol Dmel\GstT3 (CG1702, FBgn0031117). It is a protein_coding_gene from Dmel. It has 3 annotated transcripts and 3 polypeptides (2 unique). Gene sequence location is X:20467455..20469796. Its molecular function is described by: glutathione peroxidase activity; glutathione transferase activity. It is involved in the biologica…
FBgn0028360	25.4	17.2	20.27	29.01	25.09	24.83	-0.325882	0.0474007	0.855637		Cdc7	=HYPERLINK("http://flybase.org/reports/FBgn0028360", "LINK")	The gene Cdc7 kinase is referred to in FlyBase by the symbol Dmel\Cdc7 (CG32742, FBgn0028360). It is a protein_coding_gene from Dmel. It has 2 annotated transcripts and 2 polypeptides (all unique). Gene sequence location is X:6654541..6659709. Its molecular function is described by: protein serine/threonine kinase activity; histone kinase activity; protein kinase activity; ATP binding. It is invo…
FBgn0036857	30.95	34.91	38.09	37.31	45.77	47.41	-0.32571	0.0291725	0.701923		CG9629	=HYPERLINK("http://flybase.org/reports/FBgn0036857", "LINK")	The gene Aldehyde dehydrogenase 7 family member A1 is referred to in FlyBase by the symbol Dmel\Aldh7A1 (CG9629, FBgn0036857). It is a protein_coding_gene from Dmel. It has one annotated transcript and one polypeptide. Gene sequence location is 3L:19266473..19268913. Its molecular function is described by: oxidoreductase activity, acting on the aldehyde or oxo group of donors, NAD or NADP as acce…
FBgn0030482	53.73	50.56	45.16	63.28	68.1	56.16	-0.32521	0.0165555	0.528772		CG1673	=HYPERLINK("http://flybase.org/reports/FBgn0030482", "LINK")	This gene is referred to in FlyBase by the symbol Dmel\CG1673 (FBgn0030482). It is a protein_coding_gene from Dmel. It has one annotated transcript and one polypeptide. Gene sequence location is X:13396899..13401224. Its molecular function is described by: branched-chain-amino-acid transaminase activity. It is involved in the biological process described with: leucine biosynthetic process; branch…
FBgn0039620	57.06	47.83	53.29	68.49	68.65	61.33	-0.325136	0.0118357	0.444408		wat	=HYPERLINK("http://flybase.org/reports/FBgn0039620", "LINK")	The gene waterproof is referred to in FlyBase by the symbol Dmel\wat (CG1443, FBgn0039620). It is a protein_coding_gene from Dmel. It has one annotated transcript and one polypeptide. Gene sequence location is 3R:28992977..29020406. Its molecular function is described by: long-chain-fatty-acyl-CoA reductase activity; fatty-acyl-CoA reductase (alcohol-forming) activity. It is involved in the biolo…
FBgn0260990	12.73	11.43	14.19	14.87	15.48	17.73	-0.324332	0.0230184	0.635096		yata	=HYPERLINK("http://flybase.org/reports/FBgn0260990", "LINK")	The gene yata is referred to in FlyBase by the symbol Dmel\yata (CG1973, FBgn0260990). It is a protein_coding_gene from Dmel. It has 2 annotated transcripts and 2 polypeptides (1 unique). Gene sequence location is 3R:29749219..29754528. Its molecular function is described by: ATP binding. It is involved in the biological process described with: protein phosphorylation. 13 alleles are reported. Th…
FBgn0263763	93.88	101.15	79.22	107.31	126.45	110.27	-0.323723	0.0339196	0.752757		CG43680	=HYPERLINK("http://flybase.org/reports/FBgn0263763", "LINK")	This gene is referred to in FlyBase by the symbol Dmel\CG43680 (FBgn0263763). It is a protein_coding_gene from Dmel. It has one annotated transcript and one polypeptide. Gene sequence location is 3L:15052998..15053351. Its molecular function is described by: . It is involved in the biological process described with: . No alleles are reported.
FBgn0000024	6.26	5.78	8.02	7.48	8.94	8.72	-0.323196	0.0436353	0.826545		Ace	=HYPERLINK("http://flybase.org/reports/FBgn0000024", "LINK")	The gene Acetylcholine esterase is referred to in FlyBase by the symbol Dmel\Ace (CG17907, FBgn0000024). It is a protein_coding_gene from Dmel. It has 3 annotated transcripts and 3 polypeptides (2 unique). Gene sequence location is 3R:13222951..13259517. Its molecular function is described by: acetylcholinesterase activity; cholinesterase activity. It is involved in the biological process describ…
FBgn0086359	24.79	26.61	26.45	36.4	30.86	30.13	-0.321316	0.0151539	0.504267		Invadolysin	=HYPERLINK("http://flybase.org/reports/FBgn0086359", "LINK")	The gene Invadolysin is referred to in FlyBase by the symbol Dmel\Invadolysin (CG3953, FBgn0086359). It is a protein_coding_gene from Dmel. It has one annotated transcript and one polypeptide. Gene sequence location is 3R:10144668..10159134. Its molecular function is described by: peptidase activity; metalloendopeptidase activity. It is involved in the biological process described with 15 unique …
FBgn0029881	6.89	8.18	10.18	10.57	10.41	10.61	-0.32099	0.0456685	0.841804		pigs	=HYPERLINK("http://flybase.org/reports/FBgn0029881", "LINK")	The gene pickled eggs is referred to in FlyBase by the symbol Dmel\pigs (CG3973, FBgn0029881). It is a protein_coding_gene from Dmel. It has 3 annotated transcripts and 3 polypeptides (1 unique). Gene sequence location is X:6600062..6653015. Its molecular function is described by: actin filament binding; microtubule binding; cytoskeletal anchor activity. It is involved in the biological process d…
FBgn0032285	896.43	887.38	951.05	1232.22	1218.88	966.84	-0.319537	0.0184144	0.566534		CG17108	=HYPERLINK("http://flybase.org/reports/FBgn0032285", "LINK")	This gene is referred to in FlyBase by the symbol Dmel\CG17108 (FBgn0032285). It is a protein_coding_gene from Dmel. It has one annotated transcript and one polypeptide. Gene sequence location is 2L:10692940..10694103. Its molecular function is unknown. The biological processes in which it is involved are not known. 4 alleles are reported. The phenotype of these alleles manifest in: trichogen cel…
FBgn0051523	172.03	155.74	193.97	234.76	206.98	208.83	-0.316352	0.0168558	0.532315		CG31523	=HYPERLINK("http://flybase.org/reports/FBgn0051523", "LINK")	This gene is referred to in FlyBase by the symbol Dmel\CG31523 (FBgn0051523). It is a protein_coding_gene from Dmel. It has 7 annotated transcripts and 7 polypeptides (1 unique). Gene sequence location is 3R:4465421..4479207. Its molecular function is described by: fatty acid elongase activity. It is involved in the biological process described with 6 unique terms, many of which group under: memb…
FBgn0266377	8.96	7.57	10.58	11.44	11.46	10.79	-0.311443	0.0372458	0.779252		Pde8	=HYPERLINK("http://flybase.org/reports/FBgn0266377", "LINK")	The gene Phosphodiesterase 8 is referred to in FlyBase by the symbol Dmel\Pde8 (CG45019, FBgn0266377). It is a protein_coding_gene from Dmel. It has 12 annotated transcripts and 12 polypeptides (10 unique). Gene sequence location is 2R:23657567..23680844. Its molecular function is described by: 3',5'-cyclic-nucleotide phosphodiesterase activity; 3',5'-cyclic-AMP phosphodiesterase activity. It is …
FBgn0031216	4.41	3.82	5.27	5.75	5.54	5.46	-0.309308	0.0480629	0.859497		Zir	=HYPERLINK("http://flybase.org/reports/FBgn0031216", "LINK")	The gene Zizimin-related is referred to in FlyBase by the symbol Dmel\Zir (CG11376, FBgn0031216). It is a protein_coding_gene from Dmel. It has one annotated transcript and one polypeptide. Gene sequence location is 2L:94739..102086. Its molecular function is described by: Rho guanyl-nucleotide exchange factor activity. It is involved in the biological process described with: melanotic encapsulat…
FBgn0053970	24.17	21.1	30.33	29.54	31.25	33	-0.308864	0.0468026	0.850786		CG33970	=HYPERLINK("http://flybase.org/reports/FBgn0053970", "LINK")	The gene oskyddad is referred to in FlyBase by the symbol Dmel\osy (CG33970, FBgn0053970). It is a protein_coding_gene from Dmel. It has 3 annotated transcripts and 3 polypeptides (2 unique). Gene sequence location is 3R:26318355..26362588. Its molecular function is described by: ATPase activity; ATP binding. It is involved in the biological process described with: transmembrane transport. 15 all…
FBgn0035360	19.6	18.42	20.81	24.21	23.56	24.93	-0.303512	0.020331	0.592896		CG1246	=HYPERLINK("http://flybase.org/reports/FBgn0035360", "LINK")	This gene is referred to in FlyBase by the symbol Dmel\CG1246 (FBgn0035360). It is a protein_coding_gene from Dmel. It has 4 annotated transcripts and 4 polypeptides (1 unique). Gene sequence location is 3L:2648048..2650205. Its molecular function is unknown. The biological processes in which it is involved are not known. 2 alleles are reported. No phenotypic data is available. No phenotypic clas…
FBgn0000568	5.11	4.58	6.49	6.72	6.72	6.51	-0.30048	0.0496641	0.866631		Eip75B	=HYPERLINK("http://flybase.org/reports/FBgn0000568", "LINK")	The gene Ecdysone-induced protein 75B is referred to in FlyBase by the symbol Dmel\Eip75B (CG8127, FBgn0000568). It is a protein_coding_gene from Dmel. It has 7 annotated transcripts and 7 polypeptides (5 unique). Gene sequence location is 3L:17950953..18064696. Its molecular function is described by 6 unique terms, many of which group under: organic cyclic compound binding; binding; DNA binding;…
FBgn0051637	14.75	16.74	17.51	18.97	20.12	21.26	-0.298721	0.0292564	0.701923		CG31637	=HYPERLINK("http://flybase.org/reports/FBgn0051637", "LINK")	This gene is referred to in FlyBase by the symbol Dmel\CG31637 (FBgn0051637). It is a protein_coding_gene from Dmel. It has 2 annotated transcripts and 2 polypeptides (1 unique). Gene sequence location is 2L:6498647..6526996. Its molecular function is described by: N-acetylglucosamine 6-O-sulfotransferase activity. It is involved in the biological process described with: N-acetylglucosamine metab…
FBgn0027091	9.3	10.21	9.95	12.9	11.25	12.02	-0.295471	0.0383968	0.78719		CysRS	=HYPERLINK("http://flybase.org/reports/FBgn0027091", "LINK")	The gene Cysteinyl-tRNA synthetase is referred to in FlyBase by the symbol Dmel\CysRS (CG8431, FBgn0027091). It is a protein_coding_gene from Dmel. It has one annotated transcript and one polypeptide. Gene sequence location is 2R:16143147..16145906. Its molecular function is described by: tRNA binding; cysteine-tRNA ligase activity; ATP binding. It is involved in the biological process described …
FBgn0039238	15.35	18.59	16.02	19.84	21.1	20.41	-0.294486	0.0486731	0.862014		CG7016	=HYPERLINK("http://flybase.org/reports/FBgn0039238", "LINK")	This gene is referred to in FlyBase by the symbol Dmel\CG7016 (FBgn0039238). It is a protein_coding_gene from Dmel. It has one annotated transcript and one polypeptide. Gene sequence location is 3R:24862931..24864216. Its molecular function is described by: . It is involved in the biological process described with: . 2 alleles are reported. The phenotype of these alleles manifest in: mesothoracic…
FBgn0037534	34.62	41.92	42.57	48.02	51.01	47.22	-0.294074	0.0307871	0.717349		CG2781	=HYPERLINK("http://flybase.org/reports/FBgn0037534", "LINK")	The gene ELOVL fatty acid elongase is referred to in FlyBase by the symbol Dmel\ELOVL (CG2781, FBgn0037534). It is a protein_coding_gene from Dmel. It has one annotated transcript and one polypeptide. Gene sequence location is 3R:7981817..7995852. Its molecular function is described by: fatty acid elongase activity. It is involved in the biological process described with 7 unique terms, many of w…
FBgn0034883	29.33	32.13	30.76	37.14	34.71	41	-0.289651	0.0340039	0.752757		Eglp2	=HYPERLINK("http://flybase.org/reports/FBgn0034883", "LINK")	The gene Entomoglyceroporin 2 is referred to in FlyBase by the symbol Dmel\Eglp2 (CG17664, FBgn0034883). It is a protein_coding_gene from Dmel. It has 2 annotated transcripts and 2 polypeptides (all unique). Gene sequence location is 2R:23603722..23616754. Its molecular function is described by: channel activity; water channel activity. It is involved in the biological process described with: ren…
FBgn0260964	5.62	5.46	6.77	7.14	7	7.61	-0.283035	0.0438771	0.827687		Vmat	=HYPERLINK("http://flybase.org/reports/FBgn0260964", "LINK")	The gene Vesicular monoamine transporter is referred to in FlyBase by the symbol Dmel\Vmat (CG33528, FBgn0260964). It is a protein_coding_gene from Dmel. It has 4 annotated transcripts and 4 polypeptides (2 unique). Gene sequence location is 2R:13513132..13534251. Its molecular function is described by: monoamine transmembrane transporter activity; transmembrane transporter activity; serotonin:so…
FBgn0032835	133.38	168.49	157.83	174.56	183.77	200.88	-0.280291	0.0426026	0.817929		CG16772	=HYPERLINK("http://flybase.org/reports/FBgn0032835", "LINK")	This gene is referred to in FlyBase by the symbol Dmel\CG16772 (FBgn0032835). It is a protein_coding_gene from Dmel. It has 2 annotated transcripts and 2 polypeptides (1 unique). Gene sequence location is 2L:19962679..19963844. Its molecular function is unknown. The biological processes in which it is involved are not known. One allele is reported. No phenotypic data is available. The phenotypic …
FBgn0020521	19.45	15.87	20.99	22.63	23.09	22.73	-0.279483	0.0488448	0.862014		pio	=HYPERLINK("http://flybase.org/reports/FBgn0020521", "LINK")	The gene piopio is referred to in FlyBase by the symbol Dmel\pio (CG3541, FBgn0020521). It is a protein_coding_gene from Dmel. It has 4 annotated transcripts and 4 polypeptides (2 unique). Gene sequence location is 2R:24581245..24597862. Its molecular function is described by: . It is involved in the biological process described with: apposition of dorsal and ventral imaginal disc-derived wing su…
FBgn0039507	12.27	11.67	12.75	14.67	14.76	15.02	-0.274429	0.0311859	0.717675		mrt	=HYPERLINK("http://flybase.org/reports/FBgn0039507", "LINK")	The gene martik is referred to in FlyBase by the symbol Dmel\mrt (CG3361, FBgn0039507). It is a protein_coding_gene from Dmel. It has 6 annotated transcripts and 6 polypeptides (1 unique). Gene sequence location is 3R:27277249..27282661. Its molecular function is described by: transcription regulatory region sequence-specific DNA binding. It is involved in the biological process described with: r…
FBgn0000536	26.69	30.48	28.14	32.76	35.55	34.51	-0.267058	0.0289406	0.701923		eas	=HYPERLINK("http://flybase.org/reports/FBgn0000536", "LINK")	The gene easily shocked is referred to in FlyBase by the symbol Dmel\eas (CG3525, FBgn0000536). It is a protein_coding_gene from Dmel. It has 8 annotated transcripts and 8 polypeptides (3 unique). Gene sequence location is X:16278328..16285618. Its molecular function is described by: choline kinase activity; ethanolamine kinase activity. It is involved in the biological process described with 10 …
FBgn0033844	62.22	63.91	67.04	79.15	74.71	78.49	-0.264331	0.0207761	0.602157		bbc	=HYPERLINK("http://flybase.org/reports/FBgn0033844", "LINK")	The gene bb in a boxcar is referred to in FlyBase by the symbol Dmel\bbc (CG6016, FBgn0033844). It is a protein_coding_gene from Dmel. It has 4 annotated transcripts and 4 polypeptides (all unique). Gene sequence location is 2R:13486634..13494862. Its molecular function is described by: diacylglycerol cholinephosphotransferase activity; phosphotransferase activity, for other substituted phosphate…
FBgn0026620	20.23	17.75	18.99	22.66	23.48	22.35	-0.263061	0.0278288	0.694868		tacc	=HYPERLINK("http://flybase.org/reports/FBgn0026620", "LINK")	The gene transforming acidic coiled-coil protein is referred to in FlyBase by the symbol Dmel\tacc (CG9765, FBgn0026620). It is a protein_coding_gene from Dmel. It has 13 annotated transcripts and 13 polypeptides (9 unique). Gene sequence location is 3R:4733654..4749056. Its molecular function is described by: protein binding; microtubule binding. It is involved in the biological process describe…
FBgn0052521	64.72	71.4	75.82	87.59	84.85	81.83	-0.260435	0.0319416	0.727293		CG32521	=HYPERLINK("http://flybase.org/reports/FBgn0052521", "LINK")	This gene is referred to in FlyBase by the symbol Dmel\CG32521 (FBgn0052521). It is a protein_coding_gene from Dmel. It has 9 annotated transcripts and 9 polypeptides (6 unique). Gene sequence location is X:21205310..21281171. Its molecular function is unknown. The biological processes in which it is involved are not known. 19 alleles are reported. The phenotype of these alleles manifest in: eye.…
FBgn0035620	49.34	43.85	46.52	52.85	59	55.6	-0.258618	0.0368586	0.779252		CG5150	=HYPERLINK("http://flybase.org/reports/FBgn0035620", "LINK")	The gene Alkaline phosphatase 9 is referred to in FlyBase by the symbol Dmel\Alp9 (CG5150, FBgn0035620). It is a protein_coding_gene from Dmel. It has 2 annotated transcripts and 2 polypeptides (1 unique). Gene sequence location is 3L:5595542..5597422. Its molecular function is described by: alkaline phosphatase activity. It is involved in the biological process described with: dephosphorylation.…
FBgn0031069	84.66	81.93	90.29	109.43	96.3	100.23	-0.250237	0.0366379	0.779252		Pmp70	=HYPERLINK("http://flybase.org/reports/FBgn0031069", "LINK")	The gene Peroxisomal Membrane Protein 70 kDa is referred to in FlyBase by the symbol Dmel\Pmp70 (CG12703, FBgn0031069). It is a protein_coding_gene from Dmel. It has 4 annotated transcripts and 4 polypeptides (2 unique). Gene sequence location is X:19750770..19759280. Its molecular function is described by: long-chain fatty acid transporter activity; ATPase-coupled transmembrane transporter activ…
FBgn0001226	37.5	33.44	37.12	29.74	31.48	28.51	0.270743	0.0362593	0.774211		Hsp27	=HYPERLINK("http://flybase.org/reports/FBgn0001226", "LINK")	The gene Heat shock protein 27 is referred to in FlyBase by the symbol Dmel\Hsp27 (CG4466, FBgn0001226). It is a protein_coding_gene from Dmel. It has 2 annotated transcripts and 2 polypeptides (1 unique). Gene sequence location is 3L:9384063..9385694. Its molecular function is described by: unfolded protein binding; protein binding. It is involved in the biological process described with 7 uniqu…
FBgn0039114	166.77	206.81	172.11	139.84	160.08	152.77	0.272168	0.0454043	0.839141		Lsd-1	=HYPERLINK("http://flybase.org/reports/FBgn0039114", "LINK")	The gene Lipid storage droplet-1 is referred to in FlyBase by the symbol Dmel\Lsd-1 (CG10374, FBgn0039114). It is a protein_coding_gene from Dmel. It has 4 annotated transcripts and 4 polypeptides (3 unique). Gene sequence location is 3R:23763857..23766662. Its molecular function is unknown. It is involved in the biological process described with 8 unique terms, many of which group under: cellula…
FBgn0001149	897.28	864.42	760.65	655.91	708.45	727.14	0.27252	0.0276223	0.693062		GstD1	=HYPERLINK("http://flybase.org/reports/FBgn0001149", "LINK")	The gene Glutathione S transferase D1 is referred to in FlyBase by the symbol Dmel\GstD1 (CG10045, FBgn0001149). It is a protein_coding_gene from Dmel. It has 2 annotated transcripts and 2 polypeptides (1 unique). Gene sequence location is 3R:12367817..12369268. Its molecular function is described by: glutathione transferase activity; DDT-dehydrochlorinase activity. It is involved in the biologic…
FBgn0031913	125.05	132.09	129.65	93.46	109.37	117.67	0.273898	0.039258	0.791057		CG5958	=HYPERLINK("http://flybase.org/reports/FBgn0031913", "LINK")	This gene is referred to in FlyBase by the symbol Dmel\CG5958 (FBgn0031913). It is a protein_coding_gene from Dmel. It has one annotated transcript and one polypeptide. Gene sequence location is 2L:7430530..7433516. Its molecular function is described by: phosphatidylinositol bisphosphate binding. The biological processes in which it is involved are not known. 6 alleles are reported. No phenotypi…
FBgn0033229	19.18	19.76	18.39	16.23	15.76	15.15	0.284462	0.0387293	0.790179		CG12822	=HYPERLINK("http://flybase.org/reports/FBgn0033229", "LINK")	This gene is referred to in FlyBase by the symbol Dmel\CG12822 (FBgn0033229). It is a protein_coding_gene from Dmel. It has 2 annotated transcripts and 2 polypeptides (all unique). Gene sequence location is 2R:7832171..7833841. Its molecular function is described by: tRNA (adenine-N6-)-methyltransferase activity; tRNA (adenine) methyltransferase activity. The biological processes in which it is i…
FBgn0028965	26.85	24.51	22.37	20.86	19.34	20.45	0.284493	0.0454686	0.839328		A16	=HYPERLINK("http://flybase.org/reports/FBgn0028965", "LINK")	The gene A16 is referred to in FlyBase by the symbol Dmel\A16 (CG9933, FBgn0028965). It is a protein_coding_gene from Dmel. It has one annotated transcript and one polypeptide. Gene sequence location is 2L:13019575..13021312. Its molecular function is described by: protein phosphatase 1 binding. It is involved in the biological process described with: . 5 alleles are reported. No phenotypic data …
FBgn0024238	23.29	20.88	24.49	18.26	19.19	18.95	0.286017	0.022667	0.628756		Fim	=HYPERLINK("http://flybase.org/reports/FBgn0024238", "LINK")	The gene Fimbrin is referred to in FlyBase by the symbol Dmel\Fim (CG8649, FBgn0024238). It is a protein_coding_gene from Dmel. It has 3 annotated transcripts and 3 polypeptides (all unique). Gene sequence location is X:17285704..17301929. Its molecular function is described by: calcium ion binding; actin filament binding. It is involved in the biological process described with: actin filament bu…
FBgn0030485	19.77	22.44	24.2	18.15	17.46	18.81	0.28845	0.0407287	0.803485		CG1998	=HYPERLINK("http://flybase.org/reports/FBgn0030485", "LINK")	This gene is referred to in FlyBase by the symbol Dmel\CG1998 (FBgn0030485). It is a protein_coding_gene from Dmel. It has 3 annotated transcripts and 3 polypeptides (2 unique). Gene sequence location is X:13409369..13413074. Its molecular function is described by: iron ion binding; C-4 methylsterol oxidase activity; oxidoreductase activity. It is involved in the biological process described with…
FBgn0052199	17.43	15.86	15.94	14.3	12.46	13.57	0.289295	0.0442557	0.831733		CG32199	=HYPERLINK("http://flybase.org/reports/FBgn0052199", "LINK")	This gene is referred to in FlyBase by the symbol Dmel\CG32199 (FBgn0052199). It is a protein_coding_gene from Dmel. It has one annotated transcript and one polypeptide. Gene sequence location is 3L:18611900..18614004. Its molecular function is described by: procollagen-proline 4-dioxygenase activity; iron ion binding; L-ascorbic acid binding; oxidoreductase activity, acting on single donors with…
FBgn0039667	15.46	14.83	15.1	11.42	12.69	13.07	0.290799	0.0313507	0.719117		CG2010	=HYPERLINK("http://flybase.org/reports/FBgn0039667", "LINK")	The gene F-box involved in polyQ pathogenesis is referred to in FlyBase by the symbol Dmel\FipoQ (CG2010, FBgn0039667). It is a protein_coding_gene from Dmel. It has 3 annotated transcripts and 3 polypeptides (2 unique). Gene sequence location is 3R:29494782..29498923. Its molecular function is unknown. It is involved in the biological process described with: positive regulation of protein ubiqui…
FBgn0250831	161.57	167.62	131.85	126.28	125.72	124.35	0.295349	0.0369163	0.779252		BG642167	=HYPERLINK("http://flybase.org/reports/FBgn0250831", "LINK")	The gene BG642167 is referred to in FlyBase by the symbol Dmel\BG642167 (CG34103, FBgn0250831). It is a protein_coding_gene from Dmel. It has one annotated transcript and one polypeptide. Gene sequence location is 3R:25806445..25806961. Its molecular function is described by: . It is involved in the biological process described with: multicellular organism reproduction. 6 alleles are reported. No…
FBgn0035528	63.24	67.83	53.21	51.58	48.68	49.97	0.296883	0.0374785	0.779252		CG15012	=HYPERLINK("http://flybase.org/reports/FBgn0035528", "LINK")	This gene is referred to in FlyBase by the symbol Dmel\CG15012 (FBgn0035528). It is a protein_coding_gene from Dmel. It has one annotated transcript and one polypeptide. Gene sequence location is 3L:4291208..4292246. Its molecular function is unknown. It is involved in the biological process described with: late endosome to vacuole transport via multivesicular body sorting pathway. 4 alleles are …
FBgn0085354	29.5	27.13	27.06	20.82	25.31	22.16	0.297524	0.038881	0.790912		CG34325	=HYPERLINK("http://flybase.org/reports/FBgn0085354", "LINK")	This gene is referred to in FlyBase by the symbol Dmel\CG34325 (FBgn0085354). It is a protein_coding_gene from Dmel. It has 3 annotated transcripts and 3 polypeptides (2 unique). Gene sequence location is X:16714449..16721411. Its molecular function is described by: transcription coregulator activity. The biological processes in which it is involved are not known. 7 alleles are reported. No pheno…
FBgn0031517	117.4	154.29	135.17	112.25	104.76	114.28	0.298828	0.0325127	0.732765		CG15406	=HYPERLINK("http://flybase.org/reports/FBgn0031517", "LINK")	This gene is referred to in FlyBase by the symbol Dmel\CG15406 (FBgn0031517). It is a protein_coding_gene from Dmel. It has one annotated transcript and one polypeptide. Gene sequence location is 2L:3309222..3311682. Its molecular function is described by: carbohydrate:proton symporter activity. It is involved in the biological process described with: glucose import. 4 alleles are reported. The p…
FBgn0037994	20.99	18.37	19.18	15.42	15.4	16.86	0.298979	0.0264348	0.676399		eIF3d2	=HYPERLINK("http://flybase.org/reports/FBgn0037994", "LINK")	The gene eukaryotic translation initiation factor 3 subunit d2 is referred to in FlyBase by the symbol Dmel\eIF3d2 (CG4810, FBgn0037994). It is a protein_coding_gene from Dmel. It has one annotated transcript and one polypeptide. Gene sequence location is 3R:12192703..12195011. Its molecular function is described by: translation initiation factor activity. It is involved in the biological process…
FBgn0031910	24.13	26.29	21.84	17.95	21.48	19.33	0.3016	0.0450691	0.835018		CG15818	=HYPERLINK("http://flybase.org/reports/FBgn0031910", "LINK")	This gene is referred to in FlyBase by the symbol Dmel\CG15818 (FBgn0031910). It is a protein_coding_gene from Dmel. It has one annotated transcript and one polypeptide. Gene sequence location is 2L:7410909..7412229. Its molecular function is described by: carbohydrate binding. The biological processes in which it is involved are not known. 2 alleles are reported. The phenotypes of these alleles …
FBgn0051013	12.31	11.06	10.27	9.41	8.99	8.89	0.305131	0.048696	0.862014		CG31013	=HYPERLINK("http://flybase.org/reports/FBgn0051013", "LINK")	This gene is referred to in FlyBase by the symbol Dmel\CG31013 (FBgn0051013). It is a protein_coding_gene from Dmel. It has one annotated transcript and one polypeptide. Gene sequence location is 3R:30643767..30645880. Its molecular function is described by: iron ion binding; L-ascorbic acid binding; procollagen-proline 4-dioxygenase activity; oxidoreductase activity, acting on single donors with…
FBgn0003248	40.96	44.5	32.19	32.65	32.19	30.45	0.306604	0.0475109	0.855637		Rh2	=HYPERLINK("http://flybase.org/reports/FBgn0003248", "LINK")	The gene Rhodopsin 2 is referred to in FlyBase by the symbol Dmel\Rh2 (CG16740, FBgn0003248). It is a protein_coding_gene from Dmel. It has one annotated transcript and one polypeptide. Gene sequence location is 3R:18899423..18901019. Its molecular function is described by: G protein-coupled receptor activity; G protein-coupled photoreceptor activity. It is involved in the biological process desc…
FBgn0016672	60.55	61.03	49.86	46.02	44.57	48.23	0.306886	0.024584	0.653858		Ipp	=HYPERLINK("http://flybase.org/reports/FBgn0016672", "LINK")	The gene Inositol polyphosphate 1-phosphatase is referred to in FlyBase by the symbol Dmel\Ipp (CG3028, FBgn0016672). It is a protein_coding_gene from Dmel. It has one annotated transcript and one polypeptide. Gene sequence location is 3R:13958789..13960474. Its molecular function is described by: inositol-1,4-bisphosphate 1-phosphatase activity. It is involved in the biological process described…
FBgn0085455	22.78	24.35	20.63	17.07	20.03	17.79	0.307636	0.0467845	0.850786		CG34426	=HYPERLINK("http://flybase.org/reports/FBgn0085455", "LINK")	This gene is referred to in FlyBase by the symbol Dmel\CG34426 (FBgn0085455). It is a protein_coding_gene from Dmel. It has one annotated transcript and one polypeptide. Gene sequence location is 3L:8802463..8803599. Its molecular function is described by: chitin binding. It is involved in the biological process described with: chitin metabolic process. 4 alleles are reported. No phenotypic data …
FBgn0037513	24.11	30.68	29.38	23.47	23.17	21.38	0.308295	0.0403269	0.798954		pyd3	=HYPERLINK("http://flybase.org/reports/FBgn0037513", "LINK")	The gene pyd3 is referred to in FlyBase by the symbol Dmel\pyd3 (CG3027, FBgn0037513). It is a protein_coding_gene from Dmel. It has one annotated transcript and one polypeptide. Gene sequence location is 3R:7747913..7750079. Its molecular function is described by: hydrolase activity, acting on carbon-nitrogen (but not peptide) bonds, in linear amides; beta-ureidopropionase activity. It is involv…
FBgn0034278	46.74	41.16	45.62	32.93	39.52	35.58	0.310032	0.0401005	0.796156		CG14488	=HYPERLINK("http://flybase.org/reports/FBgn0034278", "LINK")	This gene is referred to in FlyBase by the symbol Dmel\CG14488 (FBgn0034278). It is a protein_coding_gene from Dmel. It has one annotated transcript and one polypeptide. Gene sequence location is 2R:17767165..17767786. Its molecular function is described by: . It is involved in the biological process described with: . 2 alleles are reported. No phenotypic data is available. The phenotypic class o…
FBgn0039678	72.83	87.96	66.94	60.15	61.6	62.22	0.310149	0.0370052	0.779252		Obp99a	=HYPERLINK("http://flybase.org/reports/FBgn0039678", "LINK")	The gene Odorant-binding protein 99a is referred to in FlyBase by the symbol Dmel\Obp99a (CG18111, FBgn0039678). It is a protein_coding_gene from Dmel. It has 2 annotated transcripts and 2 polypeptides (1 unique). Gene sequence location is 3R:29671657..29672334. Its molecular function is described by: odorant binding. It is involved in the biological process described with: olfactory behavior; se…
FBgn0034380	8.55	7.43	7.88	6.4	6.31	6.53	0.31356	0.0391193	0.791057		Vps51	=HYPERLINK("http://flybase.org/reports/FBgn0034380", "LINK")	The gene Vacuolar protein sorting 51 is referred to in FlyBase by the symbol Dmel\Vps51 (CG15087, FBgn0034380). It is a protein_coding_gene from Dmel. It has one annotated transcript and one polypeptide. Gene sequence location is 2R:18708152..18710865. Its molecular function is described by: . It is involved in the biological process described with: endocytic recycling; retrograde transport, endo…
FBgn0030317	34.1	42.25	44.15	31.81	32.78	32.33	0.31613	0.0257592	0.669049		CG1561	=HYPERLINK("http://flybase.org/reports/FBgn0030317", "LINK")	The gene Pinkman is referred to in FlyBase by the symbol Dmel\pkm (CG1561, FBgn0030317). It is a protein_coding_gene from Dmel. It has one annotated transcript and one polypeptide. Gene sequence location is X:11581957..11584175. Its molecular function is unknown. The biological processes in which it is involved are not known. 4 alleles are reported. No phenotypic data is available. The phenotypic…
FBgn0036461	19.47	16.54	14.91	14.69	14.03	12.13	0.320285	0.0410278	0.808358		Zip71B	=HYPERLINK("http://flybase.org/reports/FBgn0036461", "LINK")	The gene Zinc/iron regulated transporter-related protein 71B is referred to in FlyBase by the symbol Dmel\Zip71B (CG10006, FBgn0036461). It is a protein_coding_gene from Dmel. It has 2 annotated transcripts and 2 polypeptides (1 unique). Gene sequence location is 3L:14992289..14997983. Its molecular function is described by: zinc ion transmembrane transporter activity. It is involved in the biolo…
FBgn0031337	20.36	18.62	20.61	16.74	14.97	15.98	0.322518	0.035527	0.766178		CG14346	=HYPERLINK("http://flybase.org/reports/FBgn0031337", "LINK")	This gene is referred to in FlyBase by the symbol Dmel\CG14346 (FBgn0031337). It is a protein_coding_gene from Dmel. It has 3 annotated transcripts and 3 polypeptides (1 unique). Gene sequence location is 2L:1367996..1369050. Its molecular function is unknown. The biological processes in which it is involved are not known. 2 alleles are reported. No phenotypic data is available. The phenotypic cl…
FBgn0030883	36.75	44.47	36.57	29.62	31.7	32.96	0.323398	0.0304058	0.712294		CG7772	=HYPERLINK("http://flybase.org/reports/FBgn0030883", "LINK")	This gene is referred to in FlyBase by the symbol Dmel\CG7772 (FBgn0030883). It is a protein_coding_gene from Dmel. It has one annotated transcript and one polypeptide. Gene sequence location is X:17906031..17907261. Its molecular function is described by: . It is involved in the biological process described with: mitochondrial fission. 4 alleles are reported. No phenotypic data is available. The…
FBgn0250842	187.25	217.27	147.53	157.38	146.7	137.45	0.324667	0.0418931	0.814176		CG17575	=HYPERLINK("http://flybase.org/reports/FBgn0250842", "LINK")	This gene is referred to in FlyBase by the symbol Dmel\CG17575 (FBgn0250842). It is a protein_coding_gene from Dmel. It has 2 annotated transcripts and 2 polypeptides (all unique). Gene sequence location is 2R:12845544..12846596. Its molecular function is described by: . It is involved in the biological process described with: regulation of female receptivity, post-mating; protein localization; s…
FBgn0026751	8.02	9.24	9.05	7.56	6.2	7.21	0.326386	0.0422998	0.817399		XRCC1	=HYPERLINK("http://flybase.org/reports/FBgn0026751", "LINK")	The gene XRCC1 is referred to in FlyBase by the symbol Dmel\XRCC1 (CG4208, FBgn0026751). It is a protein_coding_gene from Dmel. It has one annotated transcript and one polypeptide. Gene sequence location is X:5329876..5332435. Its molecular function is described by: damaged DNA binding. It is involved in the biological process described with: single strand break repair; base-excision repair. 4 al…
FBgn0250868	49.63	48.22	43.63	43.18	36.77	32.9	0.327061	0.0489768	0.862014		CG42239	=HYPERLINK("http://flybase.org/reports/FBgn0250868", "LINK")	This gene is referred to in FlyBase by the symbol Dmel\CG42239 (FBgn0250868). It is a protein_coding_gene from Dmel. It has one annotated transcript and one polypeptide. Gene sequence location is 2R:17572829..17573330. Its molecular function is unknown. The biological processes in which it is involved are not known. One allele is reported. No phenotypic data is available. No phenotypic class data…
FBgn0034871	524.94	517.01	345.77	364.22	368.71	374.83	0.3274	0.0489459	0.862014		CG3906	=HYPERLINK("http://flybase.org/reports/FBgn0034871", "LINK")	This gene is referred to in FlyBase by the symbol Dmel\CG3906 (FBgn0034871). It is a protein_coding_gene from Dmel. It has one annotated transcript and one polypeptide. Gene sequence location is 2R:23511286..23512225. Its molecular function is unknown. The biological processes in which it is involved are not known. 3 alleles are reported. The phenotypes of these alleles manifest in: trichogen cel…
FBgn0030058	12.95	12.78	11.73	9.29	10.81	9.84	0.328178	0.0419007	0.814176		CG11294	=HYPERLINK("http://flybase.org/reports/FBgn0030058", "LINK")	This gene is referred to in FlyBase by the symbol Dmel\CG11294 (FBgn0030058). It is a protein_coding_gene from Dmel. It has 2 annotated transcripts and 2 polypeptides (1 unique). Gene sequence location is X:8691820..8693620. Its molecular function is described by: DNA-binding transcription factor activity, RNA polymerase II-specific; RNA polymerase II transcription regulatory region sequence-spec…
FBgn0035392	14.54	16.91	18.08	11.02	13.87	14.58	0.330749	0.0446962	0.835011		CG1271	=HYPERLINK("http://flybase.org/reports/FBgn0035392", "LINK")	This gene is referred to in FlyBase by the symbol Dmel\CG1271 (FBgn0035392). It is a protein_coding_gene from Dmel. It has 4 annotated transcripts and 4 polypeptides (all unique). Gene sequence location is 3L:3052514..3054906. Its molecular function is described by: phosphotransferase activity, alcohol group as acceptor; glycerol kinase activity. It is involved in the biological process described…
FBgn0029882	46.12	42.59	38.31	36.4	31.34	33.34	0.331733	0.0221816	0.620844		CG3226	=HYPERLINK("http://flybase.org/reports/FBgn0029882", "LINK")	This gene is referred to in FlyBase by the symbol Dmel\CG3226 (FBgn0029882). It is a protein_coding_gene from Dmel. It has one annotated transcript and one polypeptide. Gene sequence location is X:6653113..6654248. Its molecular function is described by: tubulin binding; S100 protein binding; ubiquitin protein ligase binding. It is involved in the biological process described with: heart developm…
FBgn0030669	21.3	29.04	27.38	21	22.01	18.73	0.332963	0.0496863	0.866631		CG9240	=HYPERLINK("http://flybase.org/reports/FBgn0030669", "LINK")	This gene is referred to in FlyBase by the symbol Dmel\CG9240 (FBgn0030669). It is a protein_coding_gene from Dmel. It has 2 annotated transcripts and 2 polypeptides (all unique). Gene sequence location is X:15700172..15701259. Its molecular function is described by: serine-type peptidase activity. It is involved in the biological process described with: protein processing involved in protein tar…
FBgn0010424	25.36	24.41	24.21	18.99	21.18	18.67	0.333636	0.0199324	0.591256		TpnC73F	=HYPERLINK("http://flybase.org/reports/FBgn0010424", "LINK")	The gene Troponin C at 73F is referred to in FlyBase by the symbol Dmel\TpnC73F (CG7930, FBgn0010424). It is a protein_coding_gene from Dmel. It has 2 annotated transcripts and 2 polypeptides (1 unique). Gene sequence location is 3L:17046063..17048390. Its molecular function is described by: enzyme regulator activity; calcium ion binding. It is involved in the biological process described with: m…
FBgn0262581	57.19	63.34	55.76	47.23	43.88	48.82	0.334702	0.0194697	0.586209		CG43121	=HYPERLINK("http://flybase.org/reports/FBgn0262581", "LINK")	This gene is referred to in FlyBase by the symbol Dmel\CG43121 (FBgn0262581). It is a protein_coding_gene from Dmel. It has one annotated transcript and one polypeptide. Gene sequence location is 3L:14671935..14672437. Its molecular function is described by: . It is involved in the biological process described with: . No alleles are reported.
FBgn0033875	105.72	125.11	86.5	80.04	87.38	84	0.338597	0.0286634	0.701923		CG6357	=HYPERLINK("http://flybase.org/reports/FBgn0033875", "LINK")	This gene is referred to in FlyBase by the symbol Dmel\CG6357 (FBgn0033875). It is a protein_coding_gene from Dmel. It has one annotated transcript and one polypeptide. Gene sequence location is 2R:13840053..13841743. Its molecular function is unknown. The biological processes in which it is involved are not known. 6 alleles are reported. No phenotypic data is available. The phenotypic class of a…
FBgn0052440	57.68	42.21	45.91	43.29	37.73	34.35	0.340074	0.0459601	0.844098		CG32440	=HYPERLINK("http://flybase.org/reports/FBgn0052440", "LINK")	This gene is referred to in FlyBase by the symbol Dmel\CG32440 (FBgn0052440). It is a protein_coding_gene from Dmel. It has one annotated transcript and one polypeptide. Gene sequence location is 3L:21360179..21361229. Its molecular function is unknown. The biological processes in which it is involved are not known. 2 alleles are reported. No phenotypic data is available. No phenotypic class data…
FBgn0259972	40.3	48.7	34.91	33.93	34.19	29.88	0.340566	0.0344118	0.754347		Sfp77F	=HYPERLINK("http://flybase.org/reports/FBgn0259972", "LINK")	The gene Seminal fluid protein 77F is referred to in FlyBase by the symbol Dmel\Sfp77F (CG42482, FBgn0259972). It is a protein_coding_gene from Dmel. It has 2 annotated transcripts and 2 polypeptides (1 unique). Gene sequence location is 3L:20896268..20897417. Its molecular function is described by: . It is involved in the biological process described with: multicellular organism reproduction. 2 …
FBgn0038243	29.78	33.89	24.91	22.79	26.48	20.69	0.343517	0.0412501	0.80965		CG8066	=HYPERLINK("http://flybase.org/reports/FBgn0038243", "LINK")	This gene is referred to in FlyBase by the symbol Dmel\CG8066 (FBgn0038243). It is a protein_coding_gene from Dmel. It has 2 annotated transcripts and 2 polypeptides (1 unique). Gene sequence location is 3R:14567611..14568847. Its molecular function is described by: cysteine-type endopeptidase inhibitor activity. The biological processes in which it is involved are not known. 6 alleles are report…
FBgn0038973	72.26	92.61	70.17	60.74	61.29	62.89	0.348119	0.0218975	0.618476		Pebp1	=HYPERLINK("http://flybase.org/reports/FBgn0038973", "LINK")	The gene Phosphatidylethanolamine-binding protein 1 is referred to in FlyBase by the symbol Dmel\Pebp1 (CG18594, FBgn0038973). It is a protein_coding_gene from Dmel. It has one annotated transcript and one polypeptide. Gene sequence location is 3R:22466034..22466679. Its molecular function is unknown. It is involved in the biological process described with: defense response to Gram-negative bacte…
FBgn0001225	79.34	74.44	58.02	53.76	58.96	53.87	0.349434	0.0218186	0.61815		Hsp26	=HYPERLINK("http://flybase.org/reports/FBgn0001225", "LINK")	The gene Heat shock protein 26 is referred to in FlyBase by the symbol Dmel\Hsp26 (CG4183, FBgn0001225). It is a protein_coding_gene from Dmel. It has 2 annotated transcripts and 2 polypeptides (1 unique). Gene sequence location is 3L:9376418..9377427. Its molecular function is described by: myosin binding; unfolded protein binding. It is involved in the biological process described with: chapero…
FBgn0261349	31.22	26.32	26.9	22.85	19.64	23.88	0.349435	0.0175896	0.550998		Mst36Fb	=HYPERLINK("http://flybase.org/reports/FBgn0261349", "LINK")	The gene Male-specific transcript 36Fb is referred to in FlyBase by the symbol Dmel\Mst36Fb (CG42626, FBgn0261349). It is a protein_coding_gene from Dmel. It has one annotated transcript and one polypeptide. Gene sequence location is 2L:18673363..18675094. Its molecular function is unknown. It is involved in the biological process described with: spermatogenesis. 7 alleles are reported. The pheno…
FBgn0010173	35.94	34.73	32.09	31.49	24.91	24.3	0.350043	0.0178812	0.555644		RpA-70	=HYPERLINK("http://flybase.org/reports/FBgn0010173", "LINK")	The gene Replication Protein A 70 is referred to in FlyBase by the symbol Dmel\RpA-70 (CG9633, FBgn0010173). It is a protein_coding_gene from Dmel. It has one annotated transcript and one polypeptide. Gene sequence location is 3R:8262120..8264451. Its molecular function is described by: single-stranded telomeric DNA binding; single-stranded DNA binding; sequence-specific DNA binding; damaged DNA …
FBgn0037164	8.47	7.42	6.75	5.66	6.16	5.95	0.353594	0.0290844	0.701923		CG11438	=HYPERLINK("http://flybase.org/reports/FBgn0037164", "LINK")	This gene is referred to in FlyBase by the symbol Dmel\CG11438 (FBgn0037164). It is a protein_coding_gene from Dmel. It has 2 annotated transcripts and 2 polypeptides (1 unique). Gene sequence location is 3L:22465619..22468076. Its molecular function is described by: lipid phosphatase activity; phosphatidate phosphatase activity; phosphatase activity. It is involved in the biological process desc…
FBgn0002023	3.75	3.41	4.08	2.66	3.04	3.11	0.355139	0.0331731	0.740281		Lim3	=HYPERLINK("http://flybase.org/reports/FBgn0002023", "LINK")	The gene Lim3 is referred to in FlyBase by the symbol Dmel\Lim3 (CG10699, FBgn0002023). It is a protein_coding_gene from Dmel. It has 7 annotated transcripts and 7 polypeptides (4 unique). Gene sequence location is 2L:19079256..19108427. Its molecular function is described by: RNA polymerase II transcription regulatory region sequence-specific DNA binding; DNA-binding transcription factor activit…
FBgn0030575	17.4	23.19	20.3	14.71	17.25	15.72	0.355168	0.0253093	0.661866		CG5321	=HYPERLINK("http://flybase.org/reports/FBgn0030575", "LINK")	This gene is referred to in FlyBase by the symbol Dmel\CG5321 (FBgn0030575). It is a protein_coding_gene from Dmel. It has 2 annotated transcripts and 2 polypeptides (1 unique). Gene sequence location is X:14679568..14681418. Its molecular function is described by: gamma-butyrobetaine dioxygenase activity. It is involved in the biological process described with: carnitine biosynthetic process; ox…
FBgn0044871	20.94	23.54	17.78	17.28	13.7	17.56	0.359794	0.0449689	0.835018		Gos28	=HYPERLINK("http://flybase.org/reports/FBgn0044871", "LINK")	The gene Golgi SNARE, 28 kDa is referred to in FlyBase by the symbol Dmel\Gos28 (CG7700, FBgn0044871). It is a protein_coding_gene from Dmel. It has one annotated transcript and one polypeptide. Gene sequence location is 3R:18663738..18665307. Its molecular function is described by: SNAP receptor activity. It is involved in the biological process described with 6 unique terms, many of which group…
FBgn0011670	517.52	468.93	386.4	378.01	356.08	334.1	0.364159	0.0116035	0.443196		Mst57Dc	=HYPERLINK("http://flybase.org/reports/FBgn0011670", "LINK")	The gene Male-specific transcript 57Dc is referred to in FlyBase by the symbol Dmel\Mst57Dc (CG4986, FBgn0011670). It is a protein_coding_gene from Dmel. It has one annotated transcript and one polypeptide. Gene sequence location is 3R:25829321..25829698. Its molecular function is described by: . It is involved in the biological process described with: multicellular organism reproduction; oviposi…
FBgn0015794	82.3	82.86	56.99	63.11	53.68	55.52	0.368633	0.0311674	0.717675		Rab18	=HYPERLINK("http://flybase.org/reports/FBgn0015794", "LINK")	The gene Rab18 is referred to in FlyBase by the symbol Dmel\Rab18 (CG3129, FBgn0015794). It is a protein_coding_gene from Dmel. It has one annotated transcript and one polypeptide. Gene sequence location is X:5670827..5671812. Its molecular function is described by: GTPase activity; GTP binding; protein binding. It is involved in the biological process described with: Rab protein signal transduct…
FBgn0038820	112.2	183.28	128.04	110.78	110.99	106.85	0.368725	0.0391498	0.791057		CG4000	=HYPERLINK("http://flybase.org/reports/FBgn0038820", "LINK")	This gene is referred to in FlyBase by the symbol Dmel\CG4000 (FBgn0038820). It is a protein_coding_gene from Dmel. It has one annotated transcript and one polypeptide. Gene sequence location is 3R:20676224..20677351. Its molecular function is unknown. The biological processes in which it is involved are not known. 4 alleles are reported. The phenotypes of these alleles manifest in: chaeta; mesot…
FBgn0031130	28.66	20.8	22.9	19.31	19.88	16.95	0.370436	0.0374863	0.779252		CG15452	=HYPERLINK("http://flybase.org/reports/FBgn0031130", "LINK")	This gene is referred to in FlyBase by the symbol Dmel\CG15452 (FBgn0031130). It is a protein_coding_gene from Dmel. It has one annotated transcript and one polypeptide. Gene sequence location is X:20744965..20745965. Its molecular function is unknown. The biological processes in which it is involved are not known. 2 alleles are reported. No phenotypic data is available. The phenotypic class of a…
FBgn0034538	69.35	81.22	59.05	52.5	52.73	57.19	0.370468	0.0135183	0.471744		CG16799	=HYPERLINK("http://flybase.org/reports/FBgn0034538", "LINK")	This gene is referred to in FlyBase by the symbol Dmel\CG16799 (FBgn0034538). It is a protein_coding_gene from Dmel. It has 2 annotated transcripts and 2 polypeptides (1 unique). Gene sequence location is 2R:20652557..20655096. Its molecular function is described by: lysozyme activity. It is involved in the biological process described with: defense response to Gram-negative bacterium. 5 alleles …
FBgn0023178	30.66	35.72	25.58	26.06	20.98	24.12	0.370627	0.0374894	0.779252		Pdf	=HYPERLINK("http://flybase.org/reports/FBgn0023178", "LINK")	The gene Pigment-dispersing factor is referred to in FlyBase by the symbol Dmel\Pdf (CG6496, FBgn0023178). It is a protein_coding_gene from Dmel. It has one annotated transcript and one polypeptide. Gene sequence location is 3R:26455462..26456141. Its molecular function is described by: signaling receptor binding; hormone activity; neuropeptide hormone activity. It is involved in the biological p…
FBgn0053054	19.6	26.73	20.15	16.43	17.25	17.7	0.373007	0.036937	0.779252		CG33054	=HYPERLINK("http://flybase.org/reports/FBgn0053054", "LINK")	This gene is referred to in FlyBase by the symbol Dmel\CG33054 (FBgn0053054). It is a protein_coding_gene from Dmel. It has 2 annotated transcripts and 2 polypeptides (all unique). Gene sequence location is 3L:21197411..21202882. Its molecular function is described by: ADP-ribosylglutamate hydrolase activity; purine nucleoside binding. It is involved in the biological process described with: puri…
FBgn0038395	236.04	342.04	245.77	203.6	214.16	219.43	0.373453	0.0201916	0.592376		CG10407	=HYPERLINK("http://flybase.org/reports/FBgn0038395", "LINK")	This gene is referred to in FlyBase by the symbol Dmel\CG10407 (FBgn0038395). It is a protein_coding_gene from Dmel. It has 3 annotated transcripts and 3 polypeptides (2 unique). Gene sequence location is 3R:16044747..16046130. Its molecular function is unknown. It is involved in the biological process described with: multicellular organism reproduction. 3 alleles are reported. No phenotypic data…
FBgn0262017	17.32	16.3	14.79	13.01	14	10.41	0.375159	0.0469079	0.851067		CG42830	=HYPERLINK("http://flybase.org/reports/FBgn0262017", "LINK")	This gene is referred to in FlyBase by the symbol Dmel\CG42830 (FBgn0262017). It is a protein_coding_gene from Dmel. It has one annotated transcript and one polypeptide. Gene sequence location is 2L:17811953..17812672. Its molecular function is described by: transcription coregulator activity. It is involved in the biological process described with: positive regulation of transcription by RNA pol…
FBgn0043575	179.63	286.98	195.72	168.63	161.37	180.59	0.378118	0.0344433	0.754347		PGRP-SC2	=HYPERLINK("http://flybase.org/reports/FBgn0043575", "LINK")	The gene Peptidoglycan recognition protein SC2 is referred to in FlyBase by the symbol Dmel\PGRP-SC2 (CG14745, FBgn0043575). It is a protein_coding_gene from Dmel. It has one annotated transcript and one polypeptide. Gene sequence location is 2R:8716950..8717695. Its molecular function is described by: N-acetylmuramoyl-L-alanine amidase activity; peptidoglycan binding; zinc ion binding. It is inv…
FBgn0052407	21.94	29.66	27.25	20.67	19.63	20.35	0.379418	0.0156134	0.512927		CG32407	=HYPERLINK("http://flybase.org/reports/FBgn0052407", "LINK")	This gene is referred to in FlyBase by the symbol Dmel\CG32407 (FBgn0052407). It is a protein_coding_gene from Dmel. It has 2 annotated transcripts and 2 polypeptides (1 unique). Gene sequence location is 3L:5922055..5923567. Its molecular function is unknown. The biological processes in which it is involved are not known. 3 alleles are reported. No phenotypic data is available. The phenotypic cl…
FBgn0029717	27.92	20.98	25.46	19.62	20.51	17.17	0.379423	0.0244133	0.651555		CG12684	=HYPERLINK("http://flybase.org/reports/FBgn0029717", "LINK")	This gene is referred to in FlyBase by the symbol Dmel\CG12684 (FBgn0029717). It is a protein_coding_gene from Dmel. It has one annotated transcript and one polypeptide. Gene sequence location is X:4570991..4571929. Its molecular function is unknown. The biological processes in which it is involved are not known. One allele is reported. No phenotypic data is available. The phenotypic class of all…
FBgn0029925	27.44	29.02	22.06	20.63	20.34	19.49	0.379742	0.016041	0.520358		CG3040	=HYPERLINK("http://flybase.org/reports/FBgn0029925", "LINK")	This gene is referred to in FlyBase by the symbol Dmel\CG3040 (FBgn0029925). It is a protein_coding_gene from Dmel. It has one annotated transcript and one polypeptide. Gene sequence location is X:6972324..6973393. Its molecular function is unknown. The biological processes in which it is involved are not known. 2 alleles are reported. The phenotype of these alleles manifest in: trichogen cell. T…
FBgn0036145	19.81	27.85	20.35	17.84	17.18	17.26	0.380093	0.0416949	0.813234		CG7607	=HYPERLINK("http://flybase.org/reports/FBgn0036145", "LINK")	This gene is referred to in FlyBase by the symbol Dmel\CG7607 (FBgn0036145). It is a protein_coding_gene from Dmel. It has one annotated transcript and one polypeptide. Gene sequence location is 3L:11199620..11200587. Its molecular function is unknown. The biological processes in which it is involved are not known. 6 alleles are reported. The phenotype of these alleles manifest in: intersegmental…
FBgn0030158	94.82	104.93	74.82	75.05	67.21	68.81	0.381519	0.0152803	0.507359		CG9686	=HYPERLINK("http://flybase.org/reports/FBgn0030158", "LINK")	This gene is referred to in FlyBase by the symbol Dmel\CG9686 (FBgn0030158). It is a protein_coding_gene from Dmel. It has one annotated transcript and one polypeptide. Gene sequence location is X:9879870..9880535. Its molecular function is unknown. The biological processes in which it is involved are not known. 4 alleles are reported. No phenotypic data is available. The phenotypic class of alle…
FBgn0030722	12.38	10.58	10.9	8.65	8.5	8.88	0.382763	0.0301718	0.711457		CG12395	=HYPERLINK("http://flybase.org/reports/FBgn0030722", "LINK")	This gene is referred to in FlyBase by the symbol Dmel\CG12395 (FBgn0030722). It is a protein_coding_gene from Dmel. It has one annotated transcript and one polypeptide. Gene sequence location is X:16061902..16062898. Its molecular function is described by: microtubule binding. It is involved in the biological process described with: regulation of cytoskeleton organization. 3 alleles are reported…
FBgn0036967	27.85	28.21	25.69	20.94	21.84	19.95	0.38453	0.00269152	0.175356		SCCRO4	=HYPERLINK("http://flybase.org/reports/FBgn0036967", "LINK")	The gene Squamous cell carcinoma-related oncogene 4 is referred to in FlyBase by the symbol Dmel\SCCRO4 (CG6597, FBgn0036967). It is a protein_coding_gene from Dmel. It has 4 annotated transcripts and 4 polypeptides (2 unique). Gene sequence location is 3L:20299410..20309511. Its molecular function is described by: ubiquitin conjugating enzyme binding; cullin family protein binding; ubiquitin-lik…
FBgn0040466	11.12	13.54	11.26	8.25	10.13	9.19	0.385734	0.0414538	0.81262		Dlip2	=HYPERLINK("http://flybase.org/reports/FBgn0040466", "LINK")	The gene Dorsal interacting protein 2 is referred to in FlyBase by the symbol Dmel\Dlip2 (CG9771, FBgn0040466). It is a protein_coding_gene from Dmel. It has one annotated transcript and one polypeptide. Gene sequence location is 3R:4644649..4645655. Its molecular function is described by: protein binding; nucleic acid binding. It is involved in the biological process described with: . 9 alleles …
FBgn0030060	40.08	34.91	46.29	25.44	33.11	34.2	0.389791	0.0177115	0.552584		CG2004	=HYPERLINK("http://flybase.org/reports/FBgn0030060", "LINK")	This gene is referred to in FlyBase by the symbol Dmel\CG2004 (FBgn0030060). It is a protein_coding_gene from Dmel. It has 5 annotated transcripts and 5 polypeptides (1 unique). Gene sequence location is X:8712472..8714924. Its molecular function is unknown. The biological processes in which it is involved are not known. 5 alleles are reported. No phenotypic data is available. The phenotypic clas…
FBgn0040972	49.63	44.57	36.9	28.95	38.17	33.34	0.390357	0.0325807	0.73323		CG16978	=HYPERLINK("http://flybase.org/reports/FBgn0040972", "LINK")	This gene is referred to in FlyBase by the symbol Dmel\CG16978 (FBgn0040972). It is a protein_coding_gene from Dmel. It has one annotated transcript and one polypeptide. Gene sequence location is 2L:13143214..13143622. Its molecular function is unknown. The biological processes in which it is involved are not known. 4 alleles are reported. No phenotypic data is available. The phenotypic class of …
FBgn0040923	221.03	288.58	189.92	197.2	186	151.1	0.39098	0.0289268	0.701923		CG11368	=HYPERLINK("http://flybase.org/reports/FBgn0040923", "LINK")	This gene is referred to in FlyBase by the symbol Dmel\CG11368 (FBgn0040923). It is a protein_coding_gene from Dmel. It has one annotated transcript and one polypeptide. Gene sequence location is X:7452209..7452643. Its molecular function is unknown. The biological processes in which it is involved are not known. One allele is reported. No phenotypic data is available. The phenotypic classes of a…
FBgn0026084	66.8	51.22	40.77	45.22	38.88	37.02	0.392685	0.0310697	0.717675		cib	=HYPERLINK("http://flybase.org/reports/FBgn0026084", "LINK")	The gene ciboulot is referred to in FlyBase by the symbol Dmel\cib (CG4944, FBgn0026084). It is a protein_coding_gene from Dmel. It has 5 annotated transcripts and 5 polypeptides (2 unique). Gene sequence location is X:4106113..4110981. Its molecular function is described by: actin monomer binding. It is involved in the biological process described with: larval central nervous system remodeling; …
FBgn0030313	37.77	28.67	26.93	23.04	24.02	24.23	0.39323	0.0186253	0.569632		Reepl1	=HYPERLINK("http://flybase.org/reports/FBgn0030313", "LINK")	The gene Receptor accessory protein like 1 is referred to in FlyBase by the symbol Dmel\Reepl1 (CG11697, FBgn0030313). It is a protein_coding_gene from Dmel. It has 2 annotated transcripts and 2 polypeptides (all unique). Gene sequence location is X:11572707..11573640. Its molecular function is unknown. It is involved in the biological process described with: male germ-line cyst formation. 5 alle…
FBgn0259098	14.5	15.63	12.5	11.87	10.37	10.13	0.397064	0.0491365	0.863844		CG42246	=HYPERLINK("http://flybase.org/reports/FBgn0259098", "LINK")	This gene is referred to in FlyBase by the symbol Dmel\CG42246 (FBgn0259098). It is a protein_coding_gene from Dmel. It has 2 annotated transcripts and 2 polypeptides (1 unique). Gene sequence location is X:7411267..7411906. Its molecular function is described by: . It is involved in the biological process described with: . One allele is reported. No phenotypic data is available. No phenotypic cl…
FBgn0029725	13.27	12.4	13.34	10.65	11.1	7.91	0.397461	0.0247534	0.657237		CG2871	=HYPERLINK("http://flybase.org/reports/FBgn0029725", "LINK")	This gene is referred to in FlyBase by the symbol Dmel\CG2871 (FBgn0029725). It is a protein_coding_gene from Dmel. It has one annotated transcript and one polypeptide. Gene sequence location is X:4775984..4777375. Its molecular function is described by: . It is involved in the biological process described with: . One allele is reported. No phenotypic data is available. No phenotypic class data i…
FBgn0030688	41.52	68.18	49.49	34.86	40.46	45.35	0.402362	0.0377873	0.78085		CG8952	=HYPERLINK("http://flybase.org/reports/FBgn0030688", "LINK")	This gene is referred to in FlyBase by the symbol Dmel\CG8952 (FBgn0030688). It is a protein_coding_gene from Dmel. It has one annotated transcript and one polypeptide. Gene sequence location is X:15765470..15766445. Its molecular function is described by: serine-type endopeptidase activity. It is involved in the biological process described with: proteolysis. 5 alleles are reported. No phenotypi…
FBgn0040364	18.6	24.23	18.53	15.44	15.93	15.09	0.403611	0.0078761	0.345968		CG11378	=HYPERLINK("http://flybase.org/reports/FBgn0040364", "LINK")	This gene is referred to in FlyBase by the symbol Dmel\CG11378 (FBgn0040364). It is a protein_coding_gene from Dmel. It has 3 annotated transcripts and 3 polypeptides (1 unique). Gene sequence location is X:1170828..1173797. Its molecular function is unknown. The biological processes in which it is involved are not known. 5 alleles are reported. No phenotypic data is available. The phenotypic cla…
FBgn0029667	5.69	4.92	6.94	4.4	4	4.87	0.404068	0.034072	0.752757		Gas8	=HYPERLINK("http://flybase.org/reports/FBgn0029667", "LINK")	The gene Growth arrest specific protein 8 is referred to in FlyBase by the symbol Dmel\Gas8 (CG14271, FBgn0029667). It is a protein_coding_gene from Dmel. It has 3 annotated transcripts and 3 polypeptides (2 unique). Gene sequence location is X:3491011..3504851. Its molecular function is described by: microtubule binding; Rab GTPase binding. It is involved in the biological process described with…
FBgn0004635	6.28	4.24	4.23	4.18	3.45	3.53	0.405706	0.0462808	0.845524		rho	=HYPERLINK("http://flybase.org/reports/FBgn0004635", "LINK")	The gene rhomboid is referred to in FlyBase by the symbol Dmel\rho (CG1004, FBgn0004635). It is a protein_coding_gene from Dmel. It has 2 annotated transcripts and 2 polypeptides (1 unique). Gene sequence location is 3L:1463811..1468944. Its molecular function is described by: serine-type endopeptidase activity. It is involved in the biological process described with 28 unique terms, many of whic…
FBgn0050042	110.98	205.25	159.31	111.02	139.48	109.18	0.405876	0.0470504	0.852294		Cpr49Ab	=HYPERLINK("http://flybase.org/reports/FBgn0050042", "LINK")	The gene Cuticular protein 49Ab is referred to in FlyBase by the symbol Dmel\Cpr49Ab (CG30042, FBgn0050042). It is a protein_coding_gene from Dmel. It has one annotated transcript and one polypeptide. Gene sequence location is 2R:12378440..12379396. Its molecular function is described by: structural constituent of cuticle; structural constituent of chitin-based larval cuticle. It is involved in t…
FBgn0032264	36.04	36.24	31.75	23.9	27.39	27.35	0.406675	0.0022556	0.154758		Lip4	=HYPERLINK("http://flybase.org/reports/FBgn0032264", "LINK")	The gene Lipase 4 is referred to in FlyBase by the symbol Dmel\Lip4 (CG6113, FBgn0032264). It is a protein_coding_gene from Dmel. It has 3 annotated transcripts and 3 polypeptides (all unique). Gene sequence location is 2L:10527572..10531778. Its molecular function is described by: sterol esterase activity; triglyceride lipase activity. The biological processes in which it is involved are not kno…
FBgn0047334	981.99	1004.08	627.68	598.55	627.17	747.42	0.408068	0.0262985	0.674024		BG642312	=HYPERLINK("http://flybase.org/reports/FBgn0047334", "LINK")	The gene BG642312 is referred to in FlyBase by the symbol Dmel\BG642312 (CG33943, FBgn0047334). It is a protein_coding_gene from Dmel. It has 2 annotated transcripts and 2 polypeptides (1 unique). Gene sequence location is 3L:6232469..6233381. Its molecular function is described by: . It is involved in the biological process described with: regulation of oviposition; multicellular organism reprod…
FBgn0259682	83.84	101.67	71.77	85.57	58.88	49.42	0.410315	0.0424204	0.817399		Jabba	=HYPERLINK("http://flybase.org/reports/FBgn0259682", "LINK")	The gene Jabba is referred to in FlyBase by the symbol Dmel\Jabba (CG42351, FBgn0259682). It is a protein_coding_gene from Dmel. It has 8 annotated transcripts and 8 polypeptides (7 unique). Gene sequence location is 2R:18757074..18761082. Its molecular function is described by: . It is involved in the biological process described with: . 17 alleles are reported. The phenotype of these alleles ma…
FBgn0026749	23.6	26.65	19.04	17.31	16.67	18.16	0.412565	0.0120145	0.448907		Yippee	=HYPERLINK("http://flybase.org/reports/FBgn0026749", "LINK")	The gene Yippee is referred to in FlyBase by the symbol Dmel\Yippee (CG1989, FBgn0026749). It is a protein_coding_gene from Dmel. It has 2 annotated transcripts and 2 polypeptides (all unique). Gene sequence location is X:13385914..13387417. Its molecular function is described by: metal ion binding. It is involved in the biological process described with: . 5 alleles are reported. The phenotypes …
FBgn0034245	208.22	282.79	228.58	206.49	202.43	132.14	0.413696	0.0290424	0.701923		UQCR-6.4	=HYPERLINK("http://flybase.org/reports/FBgn0034245", "LINK")	The gene Ubiquinol-cytochrome c reductase 6.4 kDa subunit is referred to in FlyBase by the symbol Dmel\UQCR-6.4 (CG14482, FBgn0034245). It is a protein_coding_gene from Dmel. It has 2 annotated transcripts and 2 polypeptides (1 unique). Gene sequence location is 2R:17572096..17572784. Its molecular function is described by: ubiquinol-cytochrome-c reductase activity. It is involved in the biologic…
FBgn0033659	8.14	11.34	6.97	7.62	5.73	6.49	0.414058	0.0474304	0.855637		Damm	=HYPERLINK("http://flybase.org/reports/FBgn0033659", "LINK")	The gene Death associated molecule related to Mch2 caspase is referred to in FlyBase by the symbol Dmel\Damm (CG18188, FBgn0033659). It is a protein_coding_gene from Dmel. It has 2 annotated transcripts and 2 polypeptides (1 unique). Gene sequence location is 2R:11864112..11866383. Its molecular function is described by: cysteine-type endopeptidase activity involved in execution phase of apoptosi…
FBgn0036670	7.69	8.29	8.64	6.51	6.84	5.13	0.415088	0.0378188	0.78085		CG13029	=HYPERLINK("http://flybase.org/reports/FBgn0036670", "LINK")	This gene is referred to in FlyBase by the symbol Dmel\CG13029 (FBgn0036670). It is a protein_coding_gene from Dmel. It has 2 annotated transcripts and 2 polypeptides (all unique). Gene sequence location is 3L:16860622..16861838. Its molecular function is described by: protein-cysteine S-palmitoyltransferase activity. It is involved in the biological process described with: peptidyl-L-cysteine S-…
FBgn0029937	19.75	17.25	16.06	14.2	11.85	13.75	0.416637	0.0123539	0.451382		CG8300	=HYPERLINK("http://flybase.org/reports/FBgn0029937", "LINK")	This gene is referred to in FlyBase by the symbol Dmel\CG8300 (FBgn0029937). It is a protein_coding_gene from Dmel. It has one annotated transcript and one polypeptide. Gene sequence location is X:7104885..7106345. Its molecular function is unknown. The biological processes in which it is involved are not known. 6 alleles are reported. No phenotypic data is available. The phenotypic class of alle…
FBgn0003863	2926.28	5084.36	3137.25	3107.62	2635.34	2625.49	0.416873	0.0346386	0.756993		alphaTry	=HYPERLINK("http://flybase.org/reports/FBgn0003863", "LINK")	The gene alphaTrypsin is referred to in FlyBase by the symbol Dmel\alphaTry (CG18444, FBgn0003863). It is a protein_coding_gene from Dmel. It has one annotated transcript and one polypeptide. Gene sequence location is 2R:11344260..11345119. Its molecular function is described by: serine-type endopeptidase activity. It is involved in the biological process described with: proteolysis. 3 alleles ar…
FBgn0030278	91.34	80.54	75.18	59.74	63.24	62.48	0.417174	0.00266985	0.174678		CG15200	=HYPERLINK("http://flybase.org/reports/FBgn0030278", "LINK")	This gene is referred to in FlyBase by the symbol Dmel\CG15200 (FBgn0030278). It is a protein_coding_gene from Dmel. It has one annotated transcript and one polypeptide. Gene sequence location is X:11182931..11183476. Its molecular function is unknown. It is involved in the biological process described with: sperm competition. 4 alleles are reported. No phenotypic data is available. The phenotypi…
FBgn0040850	20.82	21.58	18.54	13.58	17.23	15	0.41753	0.0213991	0.613334		CG15210	=HYPERLINK("http://flybase.org/reports/FBgn0040850", "LINK")	This gene is referred to in FlyBase by the symbol Dmel\CG15210 (FBgn0040850). It is a protein_coding_gene from Dmel. It has one annotated transcript and one polypeptide. Gene sequence location is X:10839230..10839895. Its molecular function is unknown. The biological processes in which it is involved are not known. 3 alleles are reported. No phenotypic data is available. The phenotypic class of a…
FBgn0039024	44.71	58.27	42.86	37.8	36.02	35.53	0.417629	0.00581213	0.295485		CG4721	=HYPERLINK("http://flybase.org/reports/FBgn0039024", "LINK")	The gene Neprilysin-like 15 is referred to in FlyBase by the symbol Dmel\Nepl15 (CG4721, FBgn0039024). It is a protein_coding_gene from Dmel. It has one annotated transcript and one polypeptide. Gene sequence location is 3R:22763960..22766172. Its molecular function is described by: metalloendopeptidase activity. It is involved in the biological process described with: compound eye morphogenesis;…
FBgn0040736	245.15	323.49	213.04	226.75	205.75	153.2	0.418832	0.0268344	0.679892		IM3	=HYPERLINK("http://flybase.org/reports/FBgn0040736", "LINK")	The gene Bomanin Short 3 is referred to in FlyBase by the symbol Dmel\BomS3 (CG16844, FBgn0040736). It is a protein_coding_gene from Dmel. It has 2 annotated transcripts and 2 polypeptides (1 unique). Gene sequence location is 2R:18387895..18388734. Its molecular function is described by: . It is involved in the biological process described with: response to bacterium; antibacterial humoral respo…
FBgn0039628	100.06	137.59	117.09	88.2	91.95	84.62	0.424392	0.0042512	0.240399		CG11841	=HYPERLINK("http://flybase.org/reports/FBgn0039628", "LINK")	This gene is referred to in FlyBase by the symbol Dmel\CG11841 (FBgn0039628). It is a protein_coding_gene from Dmel. It has one annotated transcript and one polypeptide. Gene sequence location is 3R:29051056..29052267. Its molecular function is described by: serine-type endopeptidase activity. It is involved in the biological process described with: proteolysis. 4 alleles are reported. No phenoty…
FBgn0011668	2496.06	2649.26	1968.57	2125.08	1984.09	1194	0.425931	0.0361611	0.77373		Mst57Da	=HYPERLINK("http://flybase.org/reports/FBgn0011668", "LINK")	The gene Male-specific RNA 57Da is referred to in FlyBase by the symbol Dmel\Mst57Da (CG9074, FBgn0011668). It is a protein_coding_gene from Dmel. It has one annotated transcript and one polypeptide. Gene sequence location is 3R:25831575..25831899. Its molecular function is described by: . It is involved in the biological process described with: multicellular organism reproduction; oviposition; r…
FBgn0014019	30.32	32.76	31.42	21.8	22.56	26.02	0.427666	0.00188783	0.138079		Rh5	=HYPERLINK("http://flybase.org/reports/FBgn0014019", "LINK")	The gene Rhodopsin 5 is referred to in FlyBase by the symbol Dmel\Rh5 (CG5279, FBgn0014019). It is a protein_coding_gene from Dmel. It has 2 annotated transcripts and 2 polypeptides (1 unique). Gene sequence location is 2L:12008153..12009832. Its molecular function is described by: G protein-coupled photoreceptor activity. It is involved in the biological process described with 10 unique terms, m…
FBgn0034554	8.52	9.74	9.43	6.85	7.31	6.41	0.430365	0.0145262	0.492873		CG15227	=HYPERLINK("http://flybase.org/reports/FBgn0034554", "LINK")	The gene Carbonic anhydrase 14 is referred to in FlyBase by the symbol Dmel\CAH14 (CG15227, FBgn0034554). It is a protein_coding_gene from Dmel. It has one annotated transcript and one polypeptide. Gene sequence location is 2R:20863781..20867076. Its molecular function is described by: hydro-lyase activity; carbonate dehydratase activity; zinc ion binding. It is involved in the biological process…
FBgn0029003	3.58	3.82	3.6	3.09	2.26	2.79	0.430761	0.0394992	0.791311		mab-21	=HYPERLINK("http://flybase.org/reports/FBgn0029003", "LINK")	The gene mab-21 is referred to in FlyBase by the symbol Dmel\mab-21 (CG4746, FBgn0029003). It is a protein_coding_gene from Dmel. It has one annotated transcript and one polypeptide. Gene sequence location is X:6008183..6013181. Its molecular function is described by: . It is involved in the biological process described with: . 5 alleles are reported. No phenotypic data is available. The phenotyp…
FBgn0034126	11.44	12.5	11.26	9.01	8.74	8.38	0.430827	0.0191743	0.582799		jtb	=HYPERLINK("http://flybase.org/reports/FBgn0034126", "LINK")	The gene jetboil is referred to in FlyBase by the symbol Dmel\jtb (CG4398, FBgn0034126). It is a protein_coding_gene from Dmel. It has one annotated transcript and one polypeptide. Gene sequence location is 2R:16432244..16433183. Its molecular function is unknown. The biological processes in which it is involved are not known. 5 alleles are reported. No phenotypic data is available. The phenotypi…
FBgn0036232	216.29	275.17	182.03	156.21	164.02	180.25	0.431042	0.00889411	0.369737		CG14125	=HYPERLINK("http://flybase.org/reports/FBgn0036232", "LINK")	This gene is referred to in FlyBase by the symbol Dmel\CG14125 (FBgn0036232). It is a protein_coding_gene from Dmel. It has 2 annotated transcripts and 2 polypeptides (all unique). Gene sequence location is 3L:11974905..11975810. Its molecular function is described by: chitin binding. It is involved in the biological process described with: chitin metabolic process. 6 alleles are reported. No phe…
FBgn0032774	252.92	294.28	283.58	186.78	219.78	210.46	0.431704	0.000868986	0.0740357		CG17549	=HYPERLINK("http://flybase.org/reports/FBgn0032774", "LINK")	This gene is referred to in FlyBase by the symbol Dmel\CG17549 (FBgn0032774). It is a protein_coding_gene from Dmel. It has 5 annotated transcripts and 5 polypeptides (2 unique). Gene sequence location is 2L:19387050..19390075. Its molecular function is unknown. The biological processes in which it is involved are not known. 3 alleles are reported. The phenotypes of these alleles manifest in: cha…
FBgn0036547	17.42	27.25	18.69	18.06	15.48	13.39	0.434179	0.0292792	0.701923		CG17032	=HYPERLINK("http://flybase.org/reports/FBgn0036547", "LINK")	This gene is referred to in FlyBase by the symbol Dmel\CG17032 (FBgn0036547). It is a protein_coding_gene from Dmel. It has 2 annotated transcripts and 2 polypeptides (1 unique). Gene sequence location is 3L:15958843..15960609. Its molecular function is unknown. The biological processes in which it is involved are not known. 3 alleles are reported. No phenotypic data is available. The phenotypic …
FBgn0011227	522.23	655.29	490.9	511.63	459.43	265.17	0.434773	0.0437159	0.826657		ox	=HYPERLINK("http://flybase.org/reports/FBgn0011227", "LINK")	The gene oxen is referred to in FlyBase by the symbol Dmel\ox (CG8764, FBgn0011227). It is a protein_coding_gene from Dmel. It has one annotated transcript and one polypeptide. Gene sequence location is 2R:12757133..12757529. Its molecular function is described by: ubiquinol-cytochrome-c reductase activity. It is involved in the biological process described with: mitochondrial electron transport,…
FBgn0040629	6.34	7.09	5.71	5.03	4.49	4.64	0.434931	0.0405513	0.8013		CG18673	=HYPERLINK("http://flybase.org/reports/FBgn0040629", "LINK")	The gene Carbonic anhydrase 5 is referred to in FlyBase by the symbol Dmel\CAH5 (CG18673, FBgn0040629). It is a protein_coding_gene from Dmel. It has one annotated transcript and one polypeptide. Gene sequence location is 3R:31262598..31263878. Its molecular function is described by: hydro-lyase activity; carbonate dehydratase activity; zinc ion binding. It is involved in the biological process d…
FBgn0085279	9.4	11.07	9.4	8.88	6.81	6.34	0.435531	0.039834	0.795962		CG34250	=HYPERLINK("http://flybase.org/reports/FBgn0085279", "LINK")	This gene is referred to in FlyBase by the symbol Dmel\CG34250 (FBgn0085279). It is a protein_coding_gene from Dmel. It has 2 annotated transcripts and 2 polypeptides (all unique). Gene sequence location is 3L:17476222..17477103. Its molecular function is described by: . It is involved in the biological process described with: . 4 alleles are reported. No phenotypic data is available. No phenotyp…
FBgn0050026	29.39	34.92	26.66	22.3	22.85	22.2	0.435783	0.00620211	0.306274		CG30026	=HYPERLINK("http://flybase.org/reports/FBgn0050026", "LINK")	This gene is referred to in FlyBase by the symbol Dmel\CG30026 (FBgn0050026). It is a protein_coding_gene from Dmel. It has one annotated transcript and one polypeptide. Gene sequence location is 2R:11408576..11409449. Its molecular function is described by: . It is involved in the biological process described with: . 2 alleles are reported. No phenotypic data is available. The phenotypic class o…
FBgn0260474	20.03	35.34	29.55	17.18	22.29	23.37	0.437138	0.0357207	0.768219		CG30002	=HYPERLINK("http://flybase.org/reports/FBgn0260474", "LINK")	This gene is referred to in FlyBase by the symbol Dmel\CG30002 (FBgn0260474). It is a protein_coding_gene from Dmel. It has one annotated transcript and one polypeptide. Gene sequence location is 2R:9704384..9706147. Its molecular function is described by: serine-type endopeptidase activity. It is involved in the biological process described with: proteolysis. 5 alleles are reported. No phenotypi…
FBgn0002578	13.3	15.61	8.38	9.96	8.67	8.93	0.438454	0.0416357	0.813234		Kaz-m1	=HYPERLINK("http://flybase.org/reports/FBgn0002578", "LINK")	The gene Kazal-type protease inhibitor m1 is referred to in FlyBase by the symbol Dmel\Kaz-m1 (CG8342, FBgn0002578). It is a protein_coding_gene from Dmel. It has 2 annotated transcripts and 2 polypeptides (1 unique). Gene sequence location is 3R:26014721..26016487. Its molecular function is described by: serine-type endopeptidase inhibitor activity. The biological processes in which it is involv…
FBgn0034390	4.61	5	5.47	3.44	3.47	4.22	0.438964	0.0429371	0.819929		CG15093	=HYPERLINK("http://flybase.org/reports/FBgn0034390", "LINK")	This gene is referred to in FlyBase by the symbol Dmel\CG15093 (FBgn0034390). It is a protein_coding_gene from Dmel. It has 3 annotated transcripts and 3 polypeptides (1 unique). Gene sequence location is 2R:18775669..18776978. Its molecular function is described by: NADP binding; 3-hydroxyisobutyrate dehydrogenase activity; oxidoreductase activity, acting on the CH-OH group of donors, NAD or NAD…
FBgn0030121	5.13	6.17	6.32	4.78	4.13	4.07	0.439153	0.0135491	0.471744		Cfp1	=HYPERLINK("http://flybase.org/reports/FBgn0030121", "LINK")	The gene CXXC finger protein 1 is referred to in FlyBase by the symbol Dmel\Cfp1 (CG17446, FBgn0030121). It is a protein_coding_gene from Dmel. It has 2 annotated transcripts and 2 polypeptides (all unique). Gene sequence location is X:9270434..9272960. Its molecular function is described by: zinc ion binding; DNA binding. It is involved in the biological process described with: positive regulati…
FBgn0030694	11.7	15.56	13.24	9.29	10.25	10.37	0.439257	0.0107462	0.420785		CG15602	=HYPERLINK("http://flybase.org/reports/FBgn0030694", "LINK")	This gene is referred to in FlyBase by the symbol Dmel\CG15602 (FBgn0030694). It is a protein_coding_gene from Dmel. It has 2 annotated transcripts and 2 polypeptides (1 unique). Gene sequence location is X:15799426..15800961. Its molecular function is described by: phosphatidylinositol-3-phosphate binding. It is involved in the biological process described with: mitotic cytokinesis checkpoint; a…
FBgn0052652	209.8	161.6	177.5	139.99	131.55	133.72	0.439728	0.0013114	0.10428		lncRNA:CR32652	=HYPERLINK("http://flybase.org/reports/FBgn0052652", "LINK")	The gene long non-coding RNA:CR32652 is referred to in FlyBase by the symbol Dmel\lncRNA:CR32652 (CR32652, FBgn0052652). It is a non_protein_coding_gene from Dmel. It has one annotated transcript. Gene sequence location is X:12411018..12412181. Its molecular function is described by: . It is involved in the biological process described with: . 2 alleles are reported. No phenotypic data is availab…
FBgn0050108	10.72	10.68	10.47	9.09	7.12	7.22	0.441397	0.0493304	0.865291		CG30108	=HYPERLINK("http://flybase.org/reports/FBgn0050108", "LINK")	This gene is referred to in FlyBase by the symbol Dmel\CG30108 (FBgn0050108). It is a protein_coding_gene from Dmel. It has one annotated transcript and one polypeptide. Gene sequence location is 2R:17669395..17670000. Its molecular function is described by: . It is involved in the biological process described with: . 5 alleles are reported. No phenotypic data is available. The phenotypic classes…
FBgn0037045	9.09	12.01	9.75	8.99	7.94	5.77	0.441621	0.0412203	0.80965		CG10584	=HYPERLINK("http://flybase.org/reports/FBgn0037045", "LINK")	This gene is referred to in FlyBase by the symbol Dmel\CG10584 (FBgn0037045). It is a protein_coding_gene from Dmel. It has one annotated transcript and one polypeptide. Gene sequence location is 3L:21030280..21031360. Its molecular function is described by: protein methyltransferase activity. It is involved in the biological process described with: protein methylation. 7 alleles are reported. Th…
FBgn0040153	5.5	6.18	5.77	4.27	4.07	4.51	0.442661	0.00341338	0.205811		l(1)G0469	=HYPERLINK("http://flybase.org/reports/FBgn0040153", "LINK")	The gene lethal (1) G0469 is referred to in FlyBase by the symbol Dmel\l(1)G0469 (CG32597, FBgn0040153). It is a protein_coding_gene from Dmel. It has 3 annotated transcripts and 3 polypeptides (2 unique). Gene sequence location is X:14203961..14211457. Its molecular function is described by: . It is involved in the biological process described with: . 11 alleles are reported. No phenotypic data …
FBgn0033728	35.06	51.08	43.14	25.25	34.47	35.44	0.445037	0.0164146	0.526965		Cpr49Ae	=HYPERLINK("http://flybase.org/reports/FBgn0033728", "LINK")	The gene Cuticular protein 49Ae is referred to in FlyBase by the symbol Dmel\Cpr49Ae (CG8505, FBgn0033728). It is a protein_coding_gene from Dmel. It has one annotated transcript and one polypeptide. Gene sequence location is 2R:12402216..12405108. Its molecular function is described by: structural constituent of cuticle; structural constituent of chitin-based larval cuticle. It is involved in th…
FBgn0031373	44.79	54.87	49.3	33.24	34.58	41.57	0.44777	0.00300711	0.190441		CG15358	=HYPERLINK("http://flybase.org/reports/FBgn0031373", "LINK")	This gene is referred to in FlyBase by the symbol Dmel\CG15358 (FBgn0031373). It is a protein_coding_gene from Dmel. It has 2 annotated transcripts and 2 polypeptides (1 unique). Gene sequence location is 2L:1882008..1883214. Its molecular function is described by: carbohydrate binding. The biological processes in which it is involved are not known. 3 alleles are reported. No phenotypic data is a…
FBgn0028944	14.4	21.12	13.97	9.29	12.58	14.43	0.45111	0.0474728	0.855637		Semp1	=HYPERLINK("http://flybase.org/reports/FBgn0028944", "LINK")	The gene Seminal metalloprotease-1 is referred to in FlyBase by the symbol Dmel\Semp1 (CG11864, FBgn0028944). It is a protein_coding_gene from Dmel. It has one annotated transcript and one polypeptide. Gene sequence location is 2L:15612494..15613335. Its molecular function is described by: endopeptidase activity; metalloendopeptidase activity; zinc ion binding. It is involved in the biological pr…
FBgn0262687	64.51	43.77	39.78	33.45	38.29	36.89	0.452127	0.023836	0.646156		lncRNA:CR43157	=HYPERLINK("http://flybase.org/reports/FBgn0262687", "LINK")	The gene long non-coding RNA:CR43157 is referred to in FlyBase by the symbol Dmel\lncRNA:CR43157 (CR43157, FBgn0262687). It is a non_protein_coding_gene from Dmel. It has 2 annotated transcripts. Gene sequence location is X:11919125..11919657. Its molecular function is unknown. The biological processes in which it is involved are not known. No alleles are reported.
FBgn0085229	119.18	121.16	99.21	99.65	95.65	52.99	0.453368	0.0372818	0.779252		CG34200	=HYPERLINK("http://flybase.org/reports/FBgn0085229", "LINK")	This gene is referred to in FlyBase by the symbol Dmel\CG34200 (FBgn0085229). It is a protein_coding_gene from Dmel. It has one annotated transcript and one polypeptide. Gene sequence location is 2R:5757662..5758067. Its molecular function is unknown. The biological processes in which it is involved are not known. 2 alleles are reported. No phenotypic data is available. No phenotypic class data i…
FBgn0039703	15.87	20.95	12.89	13.13	12.23	10.9	0.45592	0.0251591	0.661442		CG7829	=HYPERLINK("http://flybase.org/reports/FBgn0039703", "LINK")	This gene is referred to in FlyBase by the symbol Dmel\CG7829 (FBgn0039703). It is a protein_coding_gene from Dmel. It has one annotated transcript and one polypeptide. Gene sequence location is 3R:29816738..29817764. Its molecular function is described by: serine-type endopeptidase activity. It is involved in the biological process described with: proteolysis. 4 alleles are reported. No phenotyp…
FBgn0063499	16.02	22.8	17.75	15.21	11.9	13.97	0.46103	0.0128813	0.459166		GstE10	=HYPERLINK("http://flybase.org/reports/FBgn0063499", "LINK")	The gene Glutathione S transferase E10 is referred to in FlyBase by the symbol Dmel\GstE10 (CG17522, FBgn0063499). It is a protein_coding_gene from Dmel. It has 2 annotated transcripts and 2 polypeptides (1 unique). Gene sequence location is 2R:18396638..18398519. Its molecular function is described by: glutathione transferase activity. It is involved in the biological process described with: glu…
FBgn0262622	21.37	15.72	13.71	14.99	12.55	9.42	0.461364	0.0375926	0.779292		lncRNA:CR43146	=HYPERLINK("http://flybase.org/reports/FBgn0262622", "LINK")	The gene long non-coding RNA:CR43146 is referred to in FlyBase by the symbol Dmel\lncRNA:CR43146 (CR43146, FBgn0262622). It is a non_protein_coding_gene from Dmel. It has 2 annotated transcripts. Gene sequence location is 3L:13282393..13283410. Its molecular function is unknown. The biological processes in which it is involved are not known. No alleles are reported.
FBgn0046687	8.08	5.3	4.63	4.14	4.81	4.18	0.463399	0.0427269	0.817929		Tre1	=HYPERLINK("http://flybase.org/reports/FBgn0046687", "LINK")	The gene Trapped in endoderm 1 is referred to in FlyBase by the symbol Dmel\Tre1 (CG3171, FBgn0046687). It is a protein_coding_gene from Dmel. It has 3 annotated transcripts and 3 polypeptides (2 unique). Gene sequence location is X:5673830..5679977. Its molecular function is described by: G protein-coupled receptor activity. It is involved in the biological process described with: germ cell migr…
FBgn0053494	47.87	62.12	39.46	39.16	35.01	34.33	0.463849	0.0098885	0.40057		CG33494	=HYPERLINK("http://flybase.org/reports/FBgn0053494", "LINK")	This gene is referred to in FlyBase by the symbol Dmel\CG33494 (FBgn0053494). It is a protein_coding_gene from Dmel. It has 2 annotated transcripts and 2 polypeptides (1 unique). Gene sequence location is 3R:25493481..25495161. Its molecular function is unknown. The biological processes in which it is involved are not known. 3 alleles are reported. No phenotypic data is available. The phenotypic …
FBgn0053252	11.79	11.49	10.85	7.51	9.72	7.61	0.465027	0.0181413	0.560358		CG33252	=HYPERLINK("http://flybase.org/reports/FBgn0053252", "LINK")	This gene is referred to in FlyBase by the symbol Dmel\CG33252 (FBgn0053252). It is a protein_coding_gene from Dmel. It has one annotated transcript and one polypeptide. Gene sequence location is X:16896215..16897187. Its molecular function is described by: . It is involved in the biological process described with: . 4 alleles are reported. No phenotypic data is available. The phenotypic class of…
FBgn0030103	14.11	25.01	21.52	15.1	14.63	14.13	0.465774	0.036299	0.774211		Obp8a	=HYPERLINK("http://flybase.org/reports/FBgn0030103", "LINK")	The gene Odorant-binding protein 8a is referred to in FlyBase by the symbol Dmel\Obp8a (CG12665, FBgn0030103). It is a protein_coding_gene from Dmel. It has one annotated transcript and one polypeptide. Gene sequence location is X:9214876..9215699. Its molecular function is described by: odorant binding. It is involved in the biological process described with: sensory perception of smell; sensory…
FBgn0033518	49.32	36.02	34.39	24.55	34.18	28.03	0.46945	0.0123538	0.451382		Prx2540-2	=HYPERLINK("http://flybase.org/reports/FBgn0033518", "LINK")	The gene Peroxiredoxin 2540-2 is referred to in FlyBase by the symbol Dmel\Prx2540-2 (CG11765, FBgn0033518). It is a protein_coding_gene from Dmel. It has one annotated transcript and one polypeptide. Gene sequence location is 2R:10418718..10419761. Its molecular function is described by: peroxidase activity; peroxiredoxin activity. It is involved in the biological process described with: hydroge…
FBgn0030484	267.29	316.16	286.47	200.79	220.57	207.99	0.469519	0.000167745	0.0200081		GstT4	=HYPERLINK("http://flybase.org/reports/FBgn0030484", "LINK")	The gene Glutathione S transferase T4 is referred to in FlyBase by the symbol Dmel\GstT4 (CG1681, FBgn0030484). It is a protein_coding_gene from Dmel. It has one annotated transcript and one polypeptide. Gene sequence location is X:13404749..13409323. Its molecular function is described by: glutathione transferase activity; glutathione peroxidase activity. It is involved in the biological process…
FBgn0028523	6.73	7.12	5.4	4.58	4.42	4.9	0.472993	0.0108847	0.421945		CG5888	=HYPERLINK("http://flybase.org/reports/FBgn0028523", "LINK")	This gene is referred to in FlyBase by the symbol Dmel\CG5888 (FBgn0028523). It is a protein_coding_gene from Dmel. It has 2 annotated transcripts and 2 polypeptides (1 unique). Gene sequence location is 2L:16400175..16448469. Its molecular function is described by: voltage-gated potassium channel activity; potassium channel activator activity; ion channel binding. The biological processes in whi…
FBgn0030178	7.09	9.69	9.01	5.95	7.67	5	0.473236	0.0311952	0.717675		CG2974	=HYPERLINK("http://flybase.org/reports/FBgn0030178", "LINK")	The gene NAD(P)HX epimerase is referred to in FlyBase by the symbol Dmel\Naxe (CG2974, FBgn0030178). It is a protein_coding_gene from Dmel. It has one annotated transcript and one polypeptide. Gene sequence location is X:10084914..10086171. Its molecular function is described by: NADHX epimerase activity; NADPHX epimerase activity. The biological processes in which it is involved are not known. 5…
FBgn0085232	21.08	19.11	12.1	13.26	11.69	12.79	0.474141	0.039951	0.796156		CG34203	=HYPERLINK("http://flybase.org/reports/FBgn0085232", "LINK")	This gene is referred to in FlyBase by the symbol Dmel\CG34203 (FBgn0085232). It is a protein_coding_gene from Dmel. It has one annotated transcript and one polypeptide. Gene sequence location is 2R:21281063..21281656. Its molecular function is described by: . It is involved in the biological process described with: . No alleles are reported. Summary of modENCODE Temporal Expression Profile: Temp…
FBgn0015585	148.25	164.7	103.44	115.06	106.86	77.71	0.476871	0.0176501	0.551778		Acp63F	=HYPERLINK("http://flybase.org/reports/FBgn0015585", "LINK")	The gene Accessory gland protein 63F is referred to in FlyBase by the symbol Dmel\Acp63F (CG10852, FBgn0015585). It is a protein_coding_gene from Dmel. It has 2 annotated transcripts and 2 polypeptides (1 unique). Gene sequence location is 3L:3815839..3816354. Its molecular function is described by: . It is involved in the biological process described with: multicellular organism reproduction. 6 …
FBgn0040775	288.73	321.25	223.29	243.92	234.18	120.93	0.478233	0.0403445	0.798954		CG12158	=HYPERLINK("http://flybase.org/reports/FBgn0040775", "LINK")	This gene is referred to in FlyBase by the symbol Dmel\CG12158 (FBgn0040775). It is a protein_coding_gene from Dmel. It has one annotated transcript and one polypeptide. Gene sequence location is 2R:9362574..9362906. Its molecular function is unknown. The biological processes in which it is involved are not known. 3 alleles are reported. The phenotypes of these alleles manifest in: trichogen cell…
FBgn0054054	21.24	27.19	18.56	12.66	18.3	17.28	0.479173	0.0262716	0.674024		CG34054	=HYPERLINK("http://flybase.org/reports/FBgn0054054", "LINK")	This gene is referred to in FlyBase by the symbol Dmel\CG34054 (FBgn0054054). It is a protein_coding_gene from Dmel. It has one annotated transcript and one polypeptide. Gene sequence location is 2R:11409810..11410438. Its molecular function is described by: . It is involved in the biological process described with: . One allele is reported. No phenotypic data is available. No phenotypic class da…
FBgn0030063	13.46	15.98	12.76	9.98	9.74	10.57	0.479408	0.00810951	0.348327		CG1789	=HYPERLINK("http://flybase.org/reports/FBgn0030063", "LINK")	This gene is referred to in FlyBase by the symbol Dmel\CG1789 (FBgn0030063). It is a protein_coding_gene from Dmel. It has one annotated transcript and one polypeptide. Gene sequence location is X:8720520..8721503. Its molecular function is described by: . It is involved in the biological process described with: translation; rRNA processing. 4 alleles are reported. The phenotypes of these alleles…
FBgn0015576	29.06	28.31	43.71	22.12	24.83	25.63	0.480188	0.00767491	0.341436		alpha-Est8	=HYPERLINK("http://flybase.org/reports/FBgn0015576", "LINK")	The gene alpha-Esterase-8 is referred to in FlyBase by the symbol Dmel\alpha-Est8 (CG1121, FBgn0015576). It is a protein_coding_gene from Dmel. It has one annotated transcript and one polypeptide. Gene sequence location is 3R:7509343..7515670. Its molecular function is described by: carboxylic ester hydrolase activity. The biological processes in which it is involved are not known. 4 alleles are …
FBgn0262621	26.99	32.36	20.9	21.18	18.9	17.39	0.482483	0.0251224	0.661442		CG43145	=HYPERLINK("http://flybase.org/reports/FBgn0262621", "LINK")	This gene is referred to in FlyBase by the symbol Dmel\CG43145 (FBgn0262621). It is a protein_coding_gene from Dmel. It has one annotated transcript and one polypeptide. Gene sequence location is 2L:3701826..3702248. Its molecular function is described by: serine-type endopeptidase inhibitor activity. The biological processes in which it is involved are not known. No alleles are reported.
FBgn0267327	621.42	746.61	478.54	485.52	477.98	360	0.482916	0.00836586	0.3554		Acp33A	=HYPERLINK("http://flybase.org/reports/FBgn0267327", "LINK")	The gene Accessory gland-specific peptide 33A is referred to in FlyBase by the symbol Dmel\Acp33A (CG6555, FBgn0267327). It is a protein_coding_gene from Dmel. It has one annotated transcript and one polypeptide. Gene sequence location is 2L:11591339..11591678. Its molecular function is described by: hormone activity. It is involved in the biological process described with: negative regulation of…
FBgn0030259	6.59	8.07	6.27	5.36	5.33	4.25	0.486202	0.0473948	0.855637		CG1545	=HYPERLINK("http://flybase.org/reports/FBgn0030259", "LINK")	This gene is referred to in FlyBase by the symbol Dmel\CG1545 (FBgn0030259). It is a protein_coding_gene from Dmel. It has one annotated transcript and one polypeptide. Gene sequence location is X:11057545..11059619. Its molecular function is unknown. The biological processes in which it is involved are not known. 4 alleles are reported. No phenotypic data is available. The phenotypic class of al…
FBgn0028945	6.65	7.19	6.91	5.69	4.32	4.73	0.488699	0.0334288	0.744752		CG7631	=HYPERLINK("http://flybase.org/reports/FBgn0028945", "LINK")	This gene is referred to in FlyBase by the symbol Dmel\CG7631 (FBgn0028945). It is a protein_coding_gene from Dmel. It has one annotated transcript and one polypeptide. Gene sequence location is 2L:15628678..15629552. Its molecular function is described by: metalloendopeptidase activity; zinc ion binding. It is involved in the biological process described with: proteolysis. 2 alleles are reported…
FBgn0031700	114.94	103.45	65.01	74.55	64.06	63.61	0.489143	0.0134654	0.471744		CG14022	=HYPERLINK("http://flybase.org/reports/FBgn0031700", "LINK")	This gene is referred to in FlyBase by the symbol Dmel\CG14022 (FBgn0031700). It is a protein_coding_gene from Dmel. It has 2 annotated transcripts and 2 polypeptides (1 unique). Gene sequence location is 2L:5327975..5328879. Its molecular function is described by: acylphosphatase activity. The biological processes in which it is involved are not known. 7 alleles are reported. The phenotype of th…
FBgn0038582	6.3	7.46	4.9	4.25	4.79	4.29	0.489148	0.0446905	0.835011		CG7988	=HYPERLINK("http://flybase.org/reports/FBgn0038582", "LINK")	This gene is referred to in FlyBase by the symbol Dmel\CG7988 (FBgn0038582). It is a protein_coding_gene from Dmel. It has one annotated transcript and one polypeptide. Gene sequence location is 3R:18220526..18221473. Its molecular function is described by: . It is involved in the biological process described with: microtubule-based process; circadian rhythm. 5 alleles are reported. No phenotypic…
FBgn0045843	5.69	6.66	5.16	4.22	4.22	4.04	0.489311	0.0138773	0.478702		RacGAP84C	=HYPERLINK("http://flybase.org/reports/FBgn0045843", "LINK")	The gene Rac GTPase activating protein at 84C is referred to in FlyBase by the symbol Dmel\RacGAP84C (CG2595, FBgn0045843). It is a protein_coding_gene from Dmel. It has 2 annotated transcripts and 2 polypeptides (all unique). Gene sequence location is 3R:7285962..7287629. Its molecular function is described by: Rho GTPase binding; GTPase activator activity. It is involved in the biological proce…
FBgn0262020	4.74	3.59	4.82	3.25	2.94	3.18	0.490347	0.0361766	0.77373		CG42831	=HYPERLINK("http://flybase.org/reports/FBgn0262020", "LINK")	This gene is referred to in FlyBase by the symbol Dmel\CG42831 (FBgn0262020). It is a protein_coding_gene from Dmel. It has one annotated transcript and one polypeptide. Gene sequence location is 3L:10814819..10816084. Its molecular function is described by: . It is involved in the biological process described with: . One allele is reported. No phenotypic data is available. No phenotypic class da…
FBgn0050197	348.93	377.17	327.13	219.72	265.11	266.16	0.490721	0.00029665	0.0323261		CG30197	=HYPERLINK("http://flybase.org/reports/FBgn0050197", "LINK")	This gene is referred to in FlyBase by the symbol Dmel\CG30197 (FBgn0050197). It is a protein_coding_gene from Dmel. It has one annotated transcript and one polypeptide. Gene sequence location is 2R:14514030..14514992. Its molecular function is described by: peptidase inhibitor activity. It is involved in the biological process described with: . 5 alleles are reported. No phenotypic data is avail…
FBgn0040725	25.05	26.38	23.46	19.89	15.53	17.77	0.491899	0.00990086	0.40057		CG13946	=HYPERLINK("http://flybase.org/reports/FBgn0040725", "LINK")	This gene is referred to in FlyBase by the symbol Dmel\CG13946 (FBgn0040725). It is a protein_coding_gene from Dmel. It has one annotated transcript and one polypeptide. Gene sequence location is 2L:776536..776941. Its molecular function is unknown. The biological processes in which it is involved are not known. 3 alleles are reported. The phenotypes of these alleles manifest in: chaeta; mesothor…
FBgn0003886	10.12	13.11	7.41	7.11	8.02	6.7	0.492279	0.0218223	0.61815		alphaTub85E	=HYPERLINK("http://flybase.org/reports/FBgn0003886", "LINK")	The gene alpha-Tubulin at 85E is referred to in FlyBase by the symbol Dmel\alphaTub85E (CG9476, FBgn0003886). It is a protein_coding_gene from Dmel. It has one annotated transcript and one polypeptide. Gene sequence location is 3R:9731221..9733250. Its molecular function is described by: structural constituent of cytoskeleton; GTPase activity; GTP binding. It is involved in the biological process…
FBgn0263082	29.91	42.67	27.8	24.5	26.99	19.92	0.493008	0.0235928	0.642936		CG43350	=HYPERLINK("http://flybase.org/reports/FBgn0263082", "LINK")	This gene is referred to in FlyBase by the symbol Dmel\CG43350 (FBgn0263082). It is a protein_coding_gene from Dmel. It has 2 annotated transcripts and 2 polypeptides (1 unique). Gene sequence location is 2L:9349546..9349963. Its molecular function is described by: serine-type endopeptidase inhibitor activity. The biological processes in which it is involved are not known. 2 alleles are reported.…
FBgn0030629	7.73	7.78	8.07	5.69	5.94	5.12	0.495074	0.00405772	0.2339		CG9123	=HYPERLINK("http://flybase.org/reports/FBgn0030629", "LINK")	This gene is referred to in FlyBase by the symbol Dmel\CG9123 (FBgn0030629). It is a protein_coding_gene from Dmel. It has one annotated transcript and one polypeptide. Gene sequence location is X:15340373..15342117. Its molecular function is described by: . It is involved in the biological process described with: ribosome biogenesis; cell population proliferation. 4 alleles are reported. No phen…
FBgn0033520	17.66	13.2	9.85	9.2	9.69	10.11	0.495547	0.0267975	0.679892		Prx2540-1	=HYPERLINK("http://flybase.org/reports/FBgn0033520", "LINK")	The gene Peroxiredoxin 2540-1 is referred to in FlyBase by the symbol Dmel\Prx2540-1 (CG12405, FBgn0033520). It is a protein_coding_gene from Dmel. It has one annotated transcript and one polypeptide. Gene sequence location is 2R:10424436..10425471. Its molecular function is described by: peroxidase activity; peroxiredoxin activity. It is involved in the biological process described with: cell re…
FBgn0028415	984.94	1267.19	1209.66	1196.54	794.22	467.63	0.495878	0.0476424	0.856018		Met75Cb	=HYPERLINK("http://flybase.org/reports/FBgn0028415", "LINK")	The gene Met75Cb is referred to in FlyBase by the symbol Dmel\Met75Cb (CG18064, FBgn0028415). It is a protein_coding_gene from Dmel. It has one annotated transcript and one polypeptide. Gene sequence location is 3L:18469378..18469618. Its molecular function is described by: . It is involved in the biological process described with: multicellular organism reproduction. One allele is reported. No p…
FBgn0259965	93.2	112.3	73.3	76.06	67.7	53.86	0.498069	0.0099287	0.40057		Sfp35C	=HYPERLINK("http://flybase.org/reports/FBgn0259965", "LINK")	The gene Seminal fluid protein 35C is referred to in FlyBase by the symbol Dmel\Sfp35C (CG42475, FBgn0259965). It is a protein_coding_gene from Dmel. It has 2 annotated transcripts and 2 polypeptides (1 unique). Gene sequence location is 2L:15201613..15202092. Its molecular function is described by: . It is involved in the biological process described with: multicellular organism reproduction. On…
FBgn0034151	21.93	28.71	28.04	19.63	16.49	19.57	0.49902	0.00234487	0.158454		CG15617	=HYPERLINK("http://flybase.org/reports/FBgn0034151", "LINK")	This gene is referred to in FlyBase by the symbol Dmel\CG15617 (FBgn0034151). It is a protein_coding_gene from Dmel. It has one annotated transcript and one polypeptide. Gene sequence location is 2R:16745223..16746579. Its molecular function is described by: actin binding; muscle alpha-actinin binding. It is involved in the biological process described with: muscle structure development; actin cy…
FBgn0030310	38.46	28	17.56	21.41	19.09	19.06	0.499269	0.0322908	0.730772		PGRP-SA	=HYPERLINK("http://flybase.org/reports/FBgn0030310", "LINK")	The gene Peptidoglycan recognition protein SA is referred to in FlyBase by the symbol Dmel\PGRP-SA (CG11709, FBgn0030310). It is a protein_coding_gene from Dmel. It has 2 annotated transcripts and 2 polypeptides (1 unique). Gene sequence location is X:11561643..11562779. Its molecular function is described by 6 unique terms, many of which group under: binding; signaling receptor activity; carbohy…
FBgn0030503	17.84	22.28	18.78	12.69	15.07	13.98	0.49939	0.00141458	0.110224		Tango2	=HYPERLINK("http://flybase.org/reports/FBgn0030503", "LINK")	The gene Transport and Golgi organization 2 is referred to in FlyBase by the symbol Dmel\Tango2 (CG11176, FBgn0030503). It is a protein_coding_gene from Dmel. It has 4 annotated transcripts and 4 polypeptides (2 unique). Gene sequence location is X:13616989..13619207. Its molecular function is described by: . It is involved in the biological process described with: protein secretion; Golgi organi…
FBgn0033723	22.78	43.07	29.08	18.84	24.16	24.21	0.500787	0.0260723	0.672877		CG13155	=HYPERLINK("http://flybase.org/reports/FBgn0033723", "LINK")	This gene is referred to in FlyBase by the symbol Dmel\CG13155 (FBgn0033723). It is a protein_coding_gene from Dmel. It has one annotated transcript and one polypeptide. Gene sequence location is 2R:12379614..12380426. Its molecular function is described by: . It is involved in the biological process described with: . 4 alleles are reported. No phenotypic data is available. The phenotypic classes…
FBgn0030993	46.16	50.77	41.42	32.77	32.61	32.36	0.503512	0.000224105	0.0255512		Mec2	=HYPERLINK("http://flybase.org/reports/FBgn0030993", "LINK")	The gene Mec2 is referred to in FlyBase by the symbol Dmel\Mec2 (CG7635, FBgn0030993). It is a protein_coding_gene from Dmel. It has one annotated transcript and one polypeptide. Gene sequence location is X:19188035..19190193. Its molecular function is described by: protein binding. It is involved in the biological process described with: nephrocyte filtration. 7 alleles are reported. The phenoty…
FBgn0033949	14.04	15.03	12.85	8.82	11.19	9.66	0.504197	0.00410619	0.235817		CG10131	=HYPERLINK("http://flybase.org/reports/FBgn0033949", "LINK")	The gene beta Hydroxy acid dehydrogenase 2 is referred to in FlyBase by the symbol Dmel\Had2 (CG10131, FBgn0033949). It is a protein_coding_gene from Dmel. It has one annotated transcript and one polypeptide. Gene sequence location is 2R:14629910..14631023. Its molecular function is described by: 3-hydroxyacyl-CoA dehydrogenase activity; oxidoreductase activity, acting on the CH-OH group of donor…
FBgn0032868	194.86	178.54	129.02	114.71	120.25	119.49	0.505942	0.00210429	0.151763		CG17472	=HYPERLINK("http://flybase.org/reports/FBgn0032868", "LINK")	This gene is referred to in FlyBase by the symbol Dmel\CG17472 (FBgn0032868). It is a protein_coding_gene from Dmel. It has one annotated transcript and one polypeptide. Gene sequence location is 2L:20634515..20635167. Its molecular function is described by: . It is involved in the biological process described with: multicellular organism reproduction. 4 alleles are reported. No phenotypic data i…
FBgn0034636	2.5	1.96	2.58	1.55	1.74	1.68	0.507233	0.0219819	0.618604		twz	=HYPERLINK("http://flybase.org/reports/FBgn0034636", "LINK")	The gene tiwaz is referred to in FlyBase by the symbol Dmel\twz (CG10440, FBgn0034636). It is a protein_coding_gene from Dmel. It has 2 annotated transcripts and 2 polypeptides (all unique). Gene sequence location is 2R:21560246..21576035. Its molecular function is unknown. It is involved in the biological process described with: adult feeding behavior; protein homooligomerization; male courtship…
FBgn0033579	1.66	1.57	1.7	1.2	1.33	0.95	0.508998	0.0460831	0.844639		CG13229	=HYPERLINK("http://flybase.org/reports/FBgn0033579", "LINK")	This gene is referred to in FlyBase by the symbol Dmel\CG13229 (FBgn0033579). It is a protein_coding_gene from Dmel. It has 3 annotated transcripts and 3 polypeptides (1 unique). Gene sequence location is 2R:11139304..11172206. Its molecular function is described by: neuropeptide receptor activity; G protein-coupled receptor activity; G protein-coupled peptide receptor activity. It is involved in…
FBgn0262143	25.56	22.94	17.21	17.04	16.8	12.42	0.510546	0.0372355	0.779252		CG42869	=HYPERLINK("http://flybase.org/reports/FBgn0262143", "LINK")	This gene is referred to in FlyBase by the symbol Dmel\CG42869 (FBgn0262143). It is a protein_coding_gene from Dmel. It has one annotated transcript and one polypeptide. Gene sequence location is 3R:21736513..21736849. Its molecular function is described by: . It is involved in the biological process described with: . No alleles are reported.
FBgn0029833	28.99	29.28	18.53	18.61	16.11	19.27	0.510777	0.00798933	0.347234		MCTS1	=HYPERLINK("http://flybase.org/reports/FBgn0029833", "LINK")	The gene Malignant T cell amplified sequence 1 is referred to in FlyBase by the symbol Dmel\MCTS1 (CG5941, FBgn0029833). It is a protein_coding_gene from Dmel. It has 2 annotated transcripts and 2 polypeptides (1 unique). Gene sequence location is X:6037892..6039576. Its molecular function is described by: RNA binding. It is involved in the biological process described with: translation reinitiat…
FBgn0036364	77.21	67.44	39.46	56.36	36.97	35.99	0.511192	0.0317855	0.72587		CG14109	=HYPERLINK("http://flybase.org/reports/FBgn0036364", "LINK")	This gene is referred to in FlyBase by the symbol Dmel\CG14109 (FBgn0036364). It is a protein_coding_gene from Dmel. It has 2 annotated transcripts and 2 polypeptides (1 unique). Gene sequence location is 3L:13440910..13442420. Its molecular function is unknown. The biological processes in which it is involved are not known. 4 alleles are reported. No phenotypic data is available. The phenotypic …
FBgn0039669	23.72	19.04	17.75	15.65	13.71	13.15	0.511902	0.00485503	0.258443		ND-20L	=HYPERLINK("http://flybase.org/reports/FBgn0039669", "LINK")	The gene NADH dehydrogenase (ubiquinone) 20 kDa subunit-like is referred to in FlyBase by the symbol Dmel\ND-20L (CG2014, FBgn0039669). It is a protein_coding_gene from Dmel. It has 2 annotated transcripts and 2 polypeptides (1 unique). Gene sequence location is 3R:29515717..29516527. Its molecular function is described by: 4 iron, 4 sulfur cluster binding; NADH dehydrogenase activity; NADH dehyd…
FBgn0052203	37.22	51.5	32.33	24.84	29.83	30.38	0.512386	0.00625105	0.307711		Spn75F	=HYPERLINK("http://flybase.org/reports/FBgn0052203", "LINK")	The gene Serpin 75F is referred to in FlyBase by the symbol Dmel\Spn75F (CG32203, FBgn0052203). It is a protein_coding_gene from Dmel. It has one annotated transcript and one polypeptide. Gene sequence location is 3L:19128450..19129665. Its molecular function is described by: serine-type endopeptidase inhibitor activity. It is involved in the biological process described with: multicellular organ…
FBgn0083983	19.91	20.51	18.66	18.82	12.49	9.89	0.515148	0.0464945	0.848169		mRpL34	=HYPERLINK("http://flybase.org/reports/FBgn0083983", "LINK")	The gene mitochondrial ribosomal protein L34 is referred to in FlyBase by the symbol Dmel\mRpL34 (CG34147, FBgn0083983). It is a protein_coding_gene from Dmel. It has one annotated transcript and one polypeptide. Gene sequence location is 2R:16098948..16099337. Its molecular function is described by: structural constituent of ribosome. It is involved in the biological process described with: mito…
FBgn0035933	146.44	154.83	138.35	84.87	112.94	110.3	0.515891	0.000493603	0.048454		CG13309	=HYPERLINK("http://flybase.org/reports/FBgn0035933", "LINK")	This gene is referred to in FlyBase by the symbol Dmel\CG13309 (FBgn0035933). It is a protein_coding_gene from Dmel. It has one annotated transcript and one polypeptide. Gene sequence location is 3L:8810395..8811265. Its molecular function is described by: chitin binding. It is involved in the biological process described with: multicellular organism reproduction; chitin metabolic process. 7 alle…
FBgn0033821	137.8	202.93	128.56	109.39	115.69	102.9	0.519487	0.00392401	0.229607		CG10799	=HYPERLINK("http://flybase.org/reports/FBgn0033821", "LINK")	This gene is referred to in FlyBase by the symbol Dmel\CG10799 (FBgn0033821). It is a protein_coding_gene from Dmel. It has one annotated transcript and one polypeptide. Gene sequence location is 2R:13257886..13258477. Its molecular function is unknown. The biological processes in which it is involved are not known. 3 alleles are reported. No phenotypic data is available. The phenotypic classes o…
FBgn0266363	41.93	47.92	31.83	34.35	29.86	20.7	0.520018	0.0192437	0.582799		CG45011	=HYPERLINK("http://flybase.org/reports/FBgn0266363", "LINK")	This gene is referred to in FlyBase by the symbol Dmel\CG45011 (FBgn0266363). It is a protein_coding_gene from Dmel. It has 2 annotated transcripts and 2 polypeptides (1 unique). Gene sequence location is 2L:11834086..11834497. Its molecular function is described by: . It is involved in the biological process described with: . One allele is reported. No phenotypic data is available. No phenotypic…
FBgn0020908	152.62	248.66	170.34	107.44	138.54	153.23	0.521101	0.0080996	0.348327		Scp1	=HYPERLINK("http://flybase.org/reports/FBgn0020908", "LINK")	The gene Sarcoplasmic calcium-binding protein 1 is referred to in FlyBase by the symbol Dmel\Scp1 (CG15848, FBgn0020908). It is a protein_coding_gene from Dmel. It has 2 annotated transcripts and 2 polypeptides (1 unique). Gene sequence location is 2R:2932595..2968052. Its molecular function is described by: calcium ion binding. The biological processes in which it is involved are not known. 4 al…
FBgn0039629	34.71	53.9	36.77	28.65	31.3	27.37	0.524285	0.00437038	0.242025		CG11842	=HYPERLINK("http://flybase.org/reports/FBgn0039629", "LINK")	This gene is referred to in FlyBase by the symbol Dmel\CG11842 (FBgn0039629). It is a protein_coding_gene from Dmel. It has one annotated transcript and one polypeptide. Gene sequence location is 3R:29052680..29053913. Its molecular function is described by: serine-type endopeptidase activity. It is involved in the biological process described with: proteolysis; response to endoplasmic reticulum …
FBgn0032615	4.91	7.01	7.87	4.52	4.72	4.5	0.524383	0.0266101	0.679764		CG6012	=HYPERLINK("http://flybase.org/reports/FBgn0032615", "LINK")	This gene is referred to in FlyBase by the symbol Dmel\CG6012 (FBgn0032615). It is a protein_coding_gene from Dmel. It has one annotated transcript and one polypeptide. Gene sequence location is 2L:16860029..16861489. Its molecular function is unknown. The biological processes in which it is involved are not known. 6 alleles are reported. No phenotypic data is available. No phenotypic class data …
FBgn0264775	7.7	7.65	6.78	3.71	5.88	5.88	0.525346	0.0271924	0.684554		CG44013	=HYPERLINK("http://flybase.org/reports/FBgn0264775", "LINK")	This gene is referred to in FlyBase by the symbol Dmel\CG44013 (FBgn0264775). It is a protein_coding_gene from Dmel. It has 2 annotated transcripts and 2 polypeptides (1 unique). Gene sequence location is 3R:15508896..15509917. Its molecular function is described by: . It is involved in the biological process described with: . One allele is reported. No phenotypic data is available. No phenotypic…
FBgn0037090	25.74	44.29	43.24	22.81	26.34	29.68	0.525643	0.00992531	0.40057		Est-Q	=HYPERLINK("http://flybase.org/reports/FBgn0037090", "LINK")	The gene Esterase Q is referred to in FlyBase by the symbol Dmel\Est-Q (CG7529, FBgn0037090). It is a protein_coding_gene from Dmel. It has one annotated transcript and one polypeptide. Gene sequence location is 3L:21501421..21503959. Its molecular function is unknown. The biological processes in which it is involved are not known. 5 alleles are reported. No phenotypic data is available. The phen…
FBgn0037551	20.89	25.81	21.31	15.09	16.1	16.12	0.525721	0.000323821	0.0346288		Gie	=HYPERLINK("http://flybase.org/reports/FBgn0037551", "LINK")	The gene ADP ribosylation factor-like 8 is referred to in FlyBase by the symbol Dmel\Arl8 (CG7891, FBgn0037551). It is a protein_coding_gene from Dmel. It has 3 annotated transcripts and 3 polypeptides (1 unique). Gene sequence location is 3R:8126605..8129835. Its molecular function is described by: beta-tubulin binding; GTP binding; alpha-tubulin binding; GDP binding; protein binding. It is invo…
FBgn0034335	53.31	46.8	49.59	32.36	33.84	38.01	0.525805	0.000191133	0.0224361		GstE1	=HYPERLINK("http://flybase.org/reports/FBgn0034335", "LINK")	The gene Glutathione S transferase E1 is referred to in FlyBase by the symbol Dmel\GstE1 (CG5164, FBgn0034335). It is a protein_coding_gene from Dmel. It has one annotated transcript and one polypeptide. Gene sequence location is 2R:18398393..18399223. Its molecular function is described by: glutathione transferase activity. It is involved in the biological process described with: response to hea…
FBgn0030764	10.99	11.58	9.46	7.22	7.69	7.38	0.526869	0.00160615	0.120898		CG9777	=HYPERLINK("http://flybase.org/reports/FBgn0030764", "LINK")	This gene is referred to in FlyBase by the symbol Dmel\CG9777 (FBgn0030764). It is a protein_coding_gene from Dmel. It has one annotated transcript and one polypeptide. Gene sequence location is X:16630673..16632235. Its molecular function is described by: . It is involved in the biological process described with: . 3 alleles are reported. No phenotypic data is available. The phenotypic class of …
FBgn0035309	3.31	3.31	3.24	2.77	1.67	2.36	0.528527	0.0440802	0.8295		CG15879	=HYPERLINK("http://flybase.org/reports/FBgn0035309", "LINK")	This gene is referred to in FlyBase by the symbol Dmel\CG15879 (FBgn0035309). It is a protein_coding_gene from Dmel. It has one annotated transcript and one polypeptide. Gene sequence location is 3L:2167550..2169108. Its molecular function is described by: hydrolase activity. It is involved in the biological process described with: . 3 alleles are reported. No phenotypic data is available. The ph…
FBgn0033374	2.86	4.34	6.09	2.56	3.32	3.35	0.529147	0.0486997	0.862014		CG13741	=HYPERLINK("http://flybase.org/reports/FBgn0033374", "LINK")	The gene Bootlegger is referred to in FlyBase by the symbol Dmel\Boot (CG13741, FBgn0033374). It is a protein_coding_gene from Dmel. It has one annotated transcript and one polypeptide. Gene sequence location is 2R:9092506..9094658. Its molecular function is unknown. The biological processes in which it is involved are not known. 17 alleles are reported. The phenotype of these alleles manifest in…
FBgn0050154	21.74	22.51	24.07	11.75	21.51	14.33	0.529163	0.0202094	0.592376		CG30154	=HYPERLINK("http://flybase.org/reports/FBgn0050154", "LINK")	This gene is referred to in FlyBase by the symbol Dmel\CG30154 (FBgn0050154). It is a protein_coding_gene from Dmel. It has one annotated transcript and one polypeptide. Gene sequence location is 2R:20533359..20533934. Its molecular function is described by: . It is involved in the biological process described with: . 2 alleles are reported. No phenotypic data is available. The phenotypic classes…
FBgn0035666	30.6	48.9	45.1	32.14	25.13	29.03	0.530074	0.00627423	0.307874		Jon65Aii	=HYPERLINK("http://flybase.org/reports/FBgn0035666", "LINK")	The gene Jonah 65Aii is referred to in FlyBase by the symbol Dmel\Jon65Aii (CG6580, FBgn0035666). It is a protein_coding_gene from Dmel. It has one annotated transcript and one polypeptide. Gene sequence location is 3L:6052321..6053215. Its molecular function is described by: serine-type endopeptidase activity. It is involved in the biological process described with: proteolysis. 4 alleles are re…
FBgn0036499	15.31	15.27	13.55	10.12	11	9.52	0.530206	0.00574967	0.294239		CG7276	=HYPERLINK("http://flybase.org/reports/FBgn0036499", "LINK")	This gene is referred to in FlyBase by the symbol Dmel\CG7276 (FBgn0036499). It is a protein_coding_gene from Dmel. It has one annotated transcript and one polypeptide. Gene sequence location is 3L:15498202..15498821. Its molecular function is described by: dynein intermediate chain binding. It is involved in the biological process described with: microtubule-based movement. 3 alleles are reporte…
FBgn0267977	1.83	1.7	1.73	1.18	1.28	1.2	0.530334	0.0342736	0.752757		mh	=HYPERLINK("http://flybase.org/reports/FBgn0267977", "LINK")	The gene maternal haploid is referred to in FlyBase by the symbol Dmel\mh (CG9203, FBgn0267977). It is a protein_coding_gene from Dmel. It has one annotated transcript and one polypeptide. Gene sequence location is X:15472804..15475400. Its molecular function is described by: DNA binding; polyubiquitin modification-dependent protein binding. It is involved in the biological process described with…
FBgn0033623	17.08	14.6	14.07	13.16	9.22	9.24	0.530888	0.0241519	0.647922		CG13202	=HYPERLINK("http://flybase.org/reports/FBgn0033623", "LINK")	This gene is referred to in FlyBase by the symbol Dmel\CG13202 (FBgn0033623). It is a protein_coding_gene from Dmel. It has one annotated transcript and one polypeptide. Gene sequence location is 2R:11356114..11356600. Its molecular function is described by: protein homodimerization activity. It is involved in the biological process described with: cilium movement; determination of left/right sym…
FBgn0051415	61.76	51.69	52.63	39.04	36.04	40.03	0.531444	0.000211002	0.0244163		CG31415	=HYPERLINK("http://flybase.org/reports/FBgn0051415", "LINK")	This gene is referred to in FlyBase by the symbol Dmel\CG31415 (FBgn0051415). It is a protein_coding_gene from Dmel. It has one annotated transcript and one polypeptide. Gene sequence location is 3R:9743517..9744662. Its molecular function is described by: . It is involved in the biological process described with: . 2 alleles are reported. No phenotypic data is available. No phenotypic class data…
FBgn0035926	403.32	726.45	486.77	466.58	379.62	270.87	0.535842	0.01857	0.569065		CG5804	=HYPERLINK("http://flybase.org/reports/FBgn0035926", "LINK")	The gene Acyl-CoA binding protein 5 is referred to in FlyBase by the symbol Dmel\Acbp5 (CG5804, FBgn0035926). It is a protein_coding_gene from Dmel. It has one annotated transcript and one polypeptide. Gene sequence location is 3L:8788144..8788545. Its molecular function is described by: fatty-acyl-CoA binding. The biological processes in which it is involved are not known. 4 alleles are reported…
FBgn0036738	105.89	130.24	84.01	76.16	80.73	64.14	0.536949	0.00220711	0.154758		CG7542	=HYPERLINK("http://flybase.org/reports/FBgn0036738", "LINK")	This gene is referred to in FlyBase by the symbol Dmel\CG7542 (FBgn0036738). It is a protein_coding_gene from Dmel. It has 2 annotated transcripts and 2 polypeptides (1 unique). Gene sequence location is 3L:17549826..17550980. Its molecular function is described by: serine-type endopeptidase activity. It is involved in the biological process described with: proteolysis. 5 alleles are reported. No…
FBgn0023170	1132.43	1507.02	956.87	1105.4	900.8	473.32	0.538833	0.0318915	0.727221		RpL39	=HYPERLINK("http://flybase.org/reports/FBgn0023170", "LINK")	The gene Ribosomal protein L39 is referred to in FlyBase by the symbol Dmel\RpL39 (CG3997, FBgn0023170). It is a protein_coding_gene from Dmel. It has one annotated transcript and one polypeptide. Gene sequence location is 2R:24061853..24062431. Its molecular function is described by: structural constituent of ribosome. It is involved in the biological process described with: cytoplasmic translat…
FBgn0052506	1.88	1.55	1.49	1.18	1.11	1.1	0.540441	0.00604834	0.303513		CG32506	=HYPERLINK("http://flybase.org/reports/FBgn0052506", "LINK")	The gene trabuco is referred to in FlyBase by the symbol Dmel\tbc (CG32506, FBgn0052506). It is a protein_coding_gene from Dmel. It has 2 annotated transcripts and 2 polypeptides (1 unique). Gene sequence location is X:20449331..20467065. Its molecular function is described by: GTPase activator activity; Rab GTPase binding. It is involved in the biological process described with: intracellular pr…
FBgn0032805	5.38	5	3.18	3.05	3.11	3.18	0.544219	0.0313013	0.719049		CG10337	=HYPERLINK("http://flybase.org/reports/FBgn0032805", "LINK")	This gene is referred to in FlyBase by the symbol Dmel\CG10337 (FBgn0032805). It is a protein_coding_gene from Dmel. It has one annotated transcript and one polypeptide. Gene sequence location is 2L:19545376..19546959. Its molecular function is described by: oxidoreductase activity; heme binding. The biological processes in which it is involved are not known. 4 alleles are reported. No phenotypic…
FBgn0000500	27.45	30.99	25.68	24.18	15.17	18.2	0.544998	0.00679666	0.320331		Dsk	=HYPERLINK("http://flybase.org/reports/FBgn0000500", "LINK")	The gene Drosulfakinin is referred to in FlyBase by the symbol Dmel\Dsk (CG18090, FBgn0000500). It is a protein_coding_gene from Dmel. It has one annotated transcript and one polypeptide. Gene sequence location is 3R:4189692..4190260. Its molecular function is described by: neuropeptide hormone activity; neuropeptide receptor binding. It is involved in the biological process described with 8 uniq…
FBgn0039642	8.22	10.15	7.14	5.84	5.8	5.82	0.548325	0.00756497	0.340995		CG11882	=HYPERLINK("http://flybase.org/reports/FBgn0039642", "LINK")	This gene is referred to in FlyBase by the symbol Dmel\CG11882 (FBgn0039642). It is a protein_coding_gene from Dmel. It has 2 annotated transcripts and 2 polypeptides (1 unique). Gene sequence location is 3R:29147016..29148172. Its molecular function is unknown. The biological processes in which it is involved are not known. 6 alleles are reported. No phenotypic data is available. The phenotypic …
FBgn0028983	46.49	21.94	18.78	23.76	17.14	18.72	0.55047	0.0444056	0.832591		Spn55B	=HYPERLINK("http://flybase.org/reports/FBgn0028983", "LINK")	The gene Serpin 55B is referred to in FlyBase by the symbol Dmel\Spn55B (CG10913, FBgn0028983). It is a protein_coding_gene from Dmel. It has one annotated transcript and one polypeptide. Gene sequence location is 2R:18126347..18128210. Its molecular function is described by: serine-type endopeptidase inhibitor activity. It is involved in the biological process described with: negative regulation…
FBgn0029710	5.76	5.97	5.56	4.1	4.15	3.54	0.554176	0.00317197	0.196054		CG3568	=HYPERLINK("http://flybase.org/reports/FBgn0029710", "LINK")	This gene is referred to in FlyBase by the symbol Dmel\CG3568 (FBgn0029710). It is a protein_coding_gene from Dmel. It has one annotated transcript and one polypeptide. Gene sequence location is X:4542630..4544497. Its molecular function is described by: . It is involved in the biological process described with: . 3 alleles are reported. No phenotypic data is available. The phenotypic class of al…
FBgn0259971	497.91	409.13	321.83	351.95	305.36	177.33	0.55979	0.0148087	0.499971		CG42481	=HYPERLINK("http://flybase.org/reports/FBgn0259971", "LINK")	This gene is referred to in FlyBase by the symbol Dmel\CG42481 (FBgn0259971). It is a protein_coding_gene from Dmel. It has 2 annotated transcripts and 2 polypeptides (1 unique). Gene sequence location is 3L:13298797..13299023. Its molecular function is described by: . It is involved in the biological process described with: . No alleles are reported. Summary of modENCODE Temporal Expression Prof…
FBgn0003390	16.7	26.02	25.15	17.42	13.84	14.79	0.560017	0.00326386	0.200037		shf	=HYPERLINK("http://flybase.org/reports/FBgn0003390", "LINK")	The gene shifted is referred to in FlyBase by the symbol Dmel\shf (CG3135, FBgn0003390). It is a protein_coding_gene from Dmel. It has 4 annotated transcripts and 4 polypeptides (all unique). Gene sequence location is X:6771463..6779659. Its molecular function is described by: protein binding. It is involved in the biological process described with: smoothened signaling pathway; protein stabiliza…
FBgn0085638	18.18	24.43	17.76	14.42	13.3	13.2	0.561257	0.00214983	0.152855		CG41378	=HYPERLINK("http://flybase.org/reports/FBgn0085638", "LINK")	This gene is referred to in FlyBase by the symbol Dmel\CG41378 (FBgn0085638). It is a protein_coding_gene from Dmel. It has 4 annotated transcripts and 4 polypeptides (all unique). Gene sequence location is 2R:2770380..2846708. Its molecular function is described by: oxidoreductase activity. The biological processes in which it is involved are not known. One allele is reported. No phenotypic data…
FBgn0038756	148.21	156.2	110.96	98.48	88	95.44	0.561323	0.000493727	0.048454		CG4783	=HYPERLINK("http://flybase.org/reports/FBgn0038756", "LINK")	This gene is referred to in FlyBase by the symbol Dmel\CG4783 (FBgn0038756). It is a protein_coding_gene from Dmel. It has 2 annotated transcripts and 2 polypeptides (all unique). Gene sequence location is 3R:19948443..19948907. Its molecular function is unknown. The biological processes in which it is involved are not known. One allele is reported. No phenotypic data is available. The phenotypic…
FBgn0040755	5.09	6.03	5.17	3.5	3.05	4.49	0.562054	0.0185158	0.568526		CG17580	=HYPERLINK("http://flybase.org/reports/FBgn0040755", "LINK")	This gene is referred to in FlyBase by the symbol Dmel\CG17580 (FBgn0040755). It is a protein_coding_gene from Dmel. It has one annotated transcript and one polypeptide. Gene sequence location is 2R:12806614..12807811. Its molecular function is unknown. The biological processes in which it is involved are not known. 6 alleles are reported. No phenotypic data is available. The phenotypic class of …
FBgn0015586	108.64	117.14	67.11	53.4	68.3	76.98	0.562857	0.00668977	0.318481		Acp76A	=HYPERLINK("http://flybase.org/reports/FBgn0015586", "LINK")	The gene Accessory gland protein 76A is referred to in FlyBase by the symbol Dmel\Acp76A (CG3801, FBgn0015586). It is a protein_coding_gene from Dmel. It has 2 annotated transcripts and 2 polypeptides (all unique). Gene sequence location is 3L:19050757..19052026. Its molecular function is described by: serine-type endopeptidase inhibitor activity. It is involved in the biological process describe…
FBgn0270926	22.19	28.18	16.06	16.96	14.23	13.84	0.562984	0.00488352	0.258443		AsnS	=HYPERLINK("http://flybase.org/reports/FBgn0270926", "LINK")	The gene Asparagine synthetase is referred to in FlyBase by the symbol Dmel\AsnS (CG33486, FBgn0270926). It is a protein_coding_gene from Dmel. It has one annotated transcript and one polypeptide. Gene sequence location is 3L:21173118..21174973. Its molecular function is described by: asparagine synthase (glutamine-hydrolyzing) activity. It is involved in the biological process described with: as…
FBgn0263080	14.85	18.35	11.37	10.47	10.78	8.86	0.567913	0.0150336	0.503479		CG43348	=HYPERLINK("http://flybase.org/reports/FBgn0263080", "LINK")	This gene is referred to in FlyBase by the symbol Dmel\CG43348 (FBgn0263080). It is a protein_coding_gene from Dmel. It has 2 annotated transcripts and 2 polypeptides (1 unique). Gene sequence location is 2L:1199412..1199924. Its molecular function is described by: . It is involved in the biological process described with: . One allele is reported. No phenotypic data is available. No phenotypic c…
FBgn0003034	233	222.91	165.84	181.06	148.58	89.52	0.570324	0.0127767	0.457542		SP	=HYPERLINK("http://flybase.org/reports/FBgn0003034", "LINK")	The gene Sex Peptide is referred to in FlyBase by the symbol Dmel\SP (CG17673, FBgn0003034). It is a protein_coding_gene from Dmel. It has one annotated transcript and one polypeptide. Gene sequence location is 3L:13301635..13301922. Its molecular function is described by: G protein-coupled receptor binding; protein binding; hormone activity. It is involved in the biological process described wit…
FBgn0264329	171.92	204.34	179.16	143.85	142.99	86.24	0.575996	0.00305815	0.190441		CG43788	=HYPERLINK("http://flybase.org/reports/FBgn0264329", "LINK")	This gene is referred to in FlyBase by the symbol Dmel\CG43788 (FBgn0264329). It is a protein_coding_gene from Dmel. It has one annotated transcript and one polypeptide. Gene sequence location is 2R:16937597..16938011. Its molecular function is described by: . It is involved in the biological process described with: . No alleles are reported.
FBgn0036015	197.55	244.38	136.75	136.74	130.77	121.36	0.576051	0.00245158	0.163854		CG3088	=HYPERLINK("http://flybase.org/reports/FBgn0036015", "LINK")	This gene is referred to in FlyBase by the symbol Dmel\CG3088 (FBgn0036015). It is a protein_coding_gene from Dmel. It has one annotated transcript and one polypeptide. Gene sequence location is 3L:9600490..9601325. Its molecular function is unknown. It is involved in the biological process described with: proteolysis. 2 alleles are reported. No phenotypic data is available. The phenotypic classe…
FBgn0265445	10.98	13.21	7.36	5.63	7.27	8.33	0.578132	0.0279519	0.696821		lncRNA:CR44345	=HYPERLINK("http://flybase.org/reports/FBgn0265445", "LINK")	The gene long non-coding RNA:CR44345 is referred to in FlyBase by the symbol Dmel\lncRNA:CR44345 (CR44345, FBgn0265445). It is a non_protein_coding_gene from Dmel. It has one annotated transcript. Gene sequence location is 2L:17354877..17355523. Its molecular function is unknown. The biological processes in which it is involved are not known. No alleles are reported.
FBgn0031942	12.65	25.19	13.42	12.08	10.69	11.55	0.578167	0.0233685	0.64133		CG7203	=HYPERLINK("http://flybase.org/reports/FBgn0031942", "LINK")	This gene is referred to in FlyBase by the symbol Dmel\CG7203 (FBgn0031942). It is a protein_coding_gene from Dmel. It has 2 annotated transcripts and 2 polypeptides (1 unique). Gene sequence location is 2L:7752170..7753186. Its molecular function is unknown. The biological processes in which it is involved are not known. 6 alleles are reported. The phenotypes of these alleles manifest in: mesoth…
FBgn0001229	3.23	3.78	3.8	1.99	2.51	2.75	0.5807	0.0376669	0.779789		Hsp67Bc	=HYPERLINK("http://flybase.org/reports/FBgn0001229", "LINK")	The gene Heat shock gene 67Bc is referred to in FlyBase by the symbol Dmel\Hsp67Bc (CG4190, FBgn0001229). It is a protein_coding_gene from Dmel. It has one annotated transcript and one polypeptide. Gene sequence location is 3L:9371511..9372497. Its molecular function is described by: protein binding; unfolded protein binding. It is involved in the biological process described with: positive regul…
FBgn0030137	5.31	7.02	6.29	3.75	4.26	4.43	0.582825	0.0165913	0.528772		CG15317	=HYPERLINK("http://flybase.org/reports/FBgn0030137", "LINK")	This gene is referred to in FlyBase by the symbol Dmel\CG15317 (FBgn0030137). It is a protein_coding_gene from Dmel. It has one annotated transcript and one polypeptide. Gene sequence location is X:9555607..9556544. Its molecular function is described by: . It is involved in the biological process described with: . 3 alleles are reported. No phenotypic data is available. No phenotypic class data …
FBgn0033027	71.18	146.79	94.18	58.41	77.08	73.24	0.583922	0.00990001	0.40057		TpnC4	=HYPERLINK("http://flybase.org/reports/FBgn0033027", "LINK")	The gene Troponin C isoform 4 is referred to in FlyBase by the symbol Dmel\TpnC4 (CG12408, FBgn0033027). It is a protein_coding_gene from Dmel. It has 2 annotated transcripts and 2 polypeptides (1 unique). Gene sequence location is 2R:5503437..5507866. Its molecular function is described by: calcium ion binding; enzyme regulator activity. It is involved in the biological process described with: m…
FBgn0037815	9.46	7.07	6.53	5.27	4.29	5.84	0.587087	0.0154935	0.510069		Rrp46	=HYPERLINK("http://flybase.org/reports/FBgn0037815", "LINK")	The gene Rrp46 is referred to in FlyBase by the symbol Dmel\Rrp46 (CG4043, FBgn0037815). It is a protein_coding_gene from Dmel. It has one annotated transcript and one polypeptide. Gene sequence location is 3R:10413301..10414242. Its molecular function is unknown. It is involved in the biological process described with 6 unique terms, many of which group under: snoRNA 3'-end processing; nuclear m…
FBgn0036022	198.88	267.24	161.68	139.53	146.32	132.81	0.587269	0.000946793	0.0802239		CG8329	=HYPERLINK("http://flybase.org/reports/FBgn0036022", "LINK")	This gene is referred to in FlyBase by the symbol Dmel\CG8329 (FBgn0036022). It is a protein_coding_gene from Dmel. It has one annotated transcript and one polypeptide. Gene sequence location is 3L:9638112..9639021. Its molecular function is described by: serine-type endopeptidase activity. It is involved in the biological process described with: proteolysis. 4 alleles are reported. No phenotypic…
FBgn0030257	3.17	4.31	4.31	2.72	2.62	2.49	0.587348	0.0042556	0.240399		SmydA-4	=HYPERLINK("http://flybase.org/reports/FBgn0030257", "LINK")	The gene SET and MYND domain containing, arthropod-specific, member 4 is referred to in FlyBase by the symbol Dmel\SmydA-4 (CG11160, FBgn0030257). It is a protein_coding_gene from Dmel. It has 3 annotated transcripts and 3 polypeptides (all unique). Gene sequence location is X:11044756..11049540. Its molecular function is described by: histone deacetylase binding. It is involved in the biological…
FBgn0264843	23.06	30.87	24.94	22.47	16.51	13.25	0.590618	0.0112385	0.434121		lncRNA:CR44051	=HYPERLINK("http://flybase.org/reports/FBgn0264843", "LINK")	The gene long non-coding RNA:CR44051 is referred to in FlyBase by the symbol Dmel\lncRNA:CR44051 (CR44051, FBgn0264843). It is a non_protein_coding_gene from Dmel. It has one annotated transcript. Gene sequence location is 3L:15876091..15876472. Its molecular function is unknown. The biological processes in which it is involved are not known. No alleles are reported.
FBgn0037721	19.84	25.95	17.04	14.32	14.42	12.97	0.593058	0.00162486	0.121716		CG9427	=HYPERLINK("http://flybase.org/reports/FBgn0037721", "LINK")	This gene is referred to in FlyBase by the symbol Dmel\CG9427 (FBgn0037721). It is a protein_coding_gene from Dmel. It has 2 annotated transcripts and 2 polypeptides (all unique). Gene sequence location is 3R:9625157..9626930. Its molecular function is described by: oxidoreductase activity. The biological processes in which it is involved are not known. 4 alleles are reported. No phenotypic data …
FBgn0030773	108.73	135.34	85.67	69.94	79.36	69.66	0.593423	0.000616703	0.057606		CG9676	=HYPERLINK("http://flybase.org/reports/FBgn0030773", "LINK")	This gene is referred to in FlyBase by the symbol Dmel\CG9676 (FBgn0030773). It is a protein_coding_gene from Dmel. It has one annotated transcript and one polypeptide. Gene sequence location is X:16699152..16700170. Its molecular function is described by: serine-type endopeptidase activity. It is involved in the biological process described with: proteolysis. 5 alleles are reported. The phenotyp…
FBgn0259963	26.52	23.59	13.34	17.45	11.96	12.65	0.593646	0.0323772	0.730772		Sfp33A2	=HYPERLINK("http://flybase.org/reports/FBgn0259963", "LINK")	The gene Seminal fluid protein 33A2 is referred to in FlyBase by the symbol Dmel\Sfp33A2 (CG42473, FBgn0259963). It is a protein_coding_gene from Dmel. It has one annotated transcript and one polypeptide. Gene sequence location is 2L:11837713..11838049. Its molecular function is described by: . It is involved in the biological process described with: multicellular organism reproduction. 3 alleles…
FBgn0030346	12.9	12.89	9.72	7.57	7.43	8.54	0.59627	0.000864984	0.0740357		CG11802	=HYPERLINK("http://flybase.org/reports/FBgn0030346", "LINK")	The gene BLOC-1 related complex subunit 5 is referred to in FlyBase by the symbol Dmel\BORCS5 (CG11802, FBgn0030346). It is a protein_coding_gene from Dmel. It has one annotated transcript and one polypeptide. Gene sequence location is X:11871299..11872779. Its molecular function is unknown. It is involved in the biological process described with: positive regulation of anterograde synaptic vesic…
FBgn0052495	3	4.04	5.7	3.2	2.68	2.53	0.596302	0.0127578	0.457542		Gss2	=HYPERLINK("http://flybase.org/reports/FBgn0052495", "LINK")	The gene Glutathione synthetase 2 is referred to in FlyBase by the symbol Dmel\Gss2 (CG32495, FBgn0052495). It is a protein_coding_gene from Dmel. It has 7 annotated transcripts and 7 polypeptides (5 unique). Gene sequence location is X:17899702..17906025. Its molecular function is described by: ATP binding; glutathione synthase activity. It is involved in the biological process described with: d…
FBgn0052368	17.02	21.9	15.53	10.23	12.86	13.03	0.59725	0.00864042	0.364691		CG32368	=HYPERLINK("http://flybase.org/reports/FBgn0052368", "LINK")	This gene is referred to in FlyBase by the symbol Dmel\CG32368 (FBgn0052368). It is a protein_coding_gene from Dmel. It has one annotated transcript and one polypeptide. Gene sequence location is 3L:7915437..7915846. Its molecular function is described by: . It is involved in the biological process described with: . 4 alleles are reported. No phenotypic data is available. The phenotypic class of …
FBgn0265673	14.47	14.23	11.69	10.31	8.34	8.02	0.597399	0.0129531	0.460668		lncRNA:CR44480	=HYPERLINK("http://flybase.org/reports/FBgn0265673", "LINK")	The gene long non-coding RNA:CR44480 is referred to in FlyBase by the symbol Dmel\lncRNA:CR44480 (CR44480, FBgn0265673). It is a non_protein_coding_gene from Dmel. It has one annotated transcript. Gene sequence location is 2L:11662002..11662404. Its molecular function is unknown. The biological processes in which it is involved are not known. No alleles are reported.
FBgn0040502	406.19	445.84	266.16	259.75	263.86	216.33	0.598115	0.00137973	0.108599		CG8343	=HYPERLINK("http://flybase.org/reports/FBgn0040502", "LINK")	This gene is referred to in FlyBase by the symbol Dmel\CG8343 (FBgn0040502). It is a protein_coding_gene from Dmel. It has one annotated transcript and one polypeptide. Gene sequence location is 2R:6179726..6180356. Its molecular function is described by: carbohydrate binding. The biological processes in which it is involved are not known. 5 alleles are reported. No phenotypic data is available. …
FBgn0033439	2.92	4.91	5.48	2.65	3.73	2.38	0.604936	0.0417677	0.813631		CG1773	=HYPERLINK("http://flybase.org/reports/FBgn0033439", "LINK")	This gene is referred to in FlyBase by the symbol Dmel\CG1773 (FBgn0033439). It is a protein_coding_gene from Dmel. It has one annotated transcript and one polypeptide. Gene sequence location is 2R:9706267..9707580. Its molecular function is described by: serine-type endopeptidase activity. It is involved in the biological process described with: proteolysis. 6 alleles are reported. The phenotype…
FBgn0030357	18.41	10.4	6.57	9.16	7.3	6.82	0.606621	0.0320856	0.728433		Sclp	=HYPERLINK("http://flybase.org/reports/FBgn0030357", "LINK")	The gene Sclp is referred to in FlyBase by the symbol Dmel\Sclp (CG2471, FBgn0030357). It is a protein_coding_gene from Dmel. It has 3 annotated transcripts and 3 polypeptides (all unique). Gene sequence location is X:11920004..11924662. Its molecular function is described by: . It is involved in the biological process described with: muscle system process. 13 alleles are reported. No phenotypic …
FBgn0037151	14.39	8.49	6.8	6.15	6.56	6.89	0.606953	0.0285277	0.701923		CG7130	=HYPERLINK("http://flybase.org/reports/FBgn0037151", "LINK")	This gene is referred to in FlyBase by the symbol Dmel\CG7130 (FBgn0037151). It is a protein_coding_gene from Dmel. It has one annotated transcript and one polypeptide. Gene sequence location is 3L:22075056..22075756. Its molecular function is unknown. The biological processes in which it is involved are not known. 5 alleles are reported. No phenotypic data is available. The phenotypic class of a…
FBgn0261506	5.92	6.24	5.21	4.13	4.01	3.26	0.608966	0.0415739	0.813234		CG42654	=HYPERLINK("http://flybase.org/reports/FBgn0261506", "LINK")	This gene is referred to in FlyBase by the symbol Dmel\CG42654 (FBgn0261506). It is a protein_coding_gene from Dmel. It has 2 annotated transcripts and 2 polypeptides (all unique). Gene sequence location is 3L:19953794..19954526. Its molecular function is described by: . It is involved in the biological process described with: . No alleles are reported. Summary of modENCODE Temporal Expression Pr…
FBgn0033115	4.86	4.27	3.32	2.71	2.44	3.04	0.609068	0.0117054	0.444408		Spn42De	=HYPERLINK("http://flybase.org/reports/FBgn0033115", "LINK")	The gene Serpin 42De is referred to in FlyBase by the symbol Dmel\Spn42De (CG9460, FBgn0033115). It is a protein_coding_gene from Dmel. It has 2 annotated transcripts and 2 polypeptides (all unique). Gene sequence location is 2R:6885552..6888262. Its molecular function is described by: serine-type endopeptidase inhibitor activity. It is involved in the biological process described with: negative …
FBgn0265087	15.61	14.92	9.88	10.15	9.05	7.3	0.610845	0.0192117	0.582799		lncRNA:CR44198	=HYPERLINK("http://flybase.org/reports/FBgn0265087", "LINK")	This gene is referred to in FlyBase by the symbol Dmel\CG44198 (FBgn0265087). It is a protein_coding_gene from Dmel. It has one annotated transcript and one polypeptide. Gene sequence location is 2L:13118890..13119134. Its molecular function is unknown. The biological processes in which it is involved are not known. No alleles are reported.
FBgn0264377	8.53	13.52	8.2	7.95	6.29	5.49	0.611566	0.035047	0.761118		CG43829	=HYPERLINK("http://flybase.org/reports/FBgn0264377", "LINK")	This gene is referred to in FlyBase by the symbol Dmel\CG43829 (FBgn0264377). It is a protein_coding_gene from Dmel. It has one annotated transcript and one polypeptide. Gene sequence location is 2R:15193996..15194505. Its molecular function is described by: . It is involved in the biological process described with: . No alleles are reported.
FBgn0035791	10.35	14.81	11.31	6.45	8.67	8.81	0.611752	0.00215886	0.152855		CG8539	=HYPERLINK("http://flybase.org/reports/FBgn0035791", "LINK")	This gene is referred to in FlyBase by the symbol Dmel\CG8539 (FBgn0035791). It is a protein_coding_gene from Dmel. It has 2 annotated transcripts and 2 polypeptides (1 unique). Gene sequence location is 3L:7497211..7498831. Its molecular function is described by: zinc ion binding; metallocarboxypeptidase activity. It is involved in the biological process described with: proteolysis. 3 alleles ar…
FBgn0259737	5.14	3.33	4.04	3.01	2.54	2.65	0.61453	0.037471	0.779252		CG42391	=HYPERLINK("http://flybase.org/reports/FBgn0259737", "LINK")	This gene is referred to in FlyBase by the symbol Dmel\CG42391 (FBgn0259737). It is a protein_coding_gene from Dmel. It has one annotated transcript and one polypeptide. Gene sequence location is 2R:15202193..15202987. Its molecular function is described by: endonuclease activity. It is involved in the biological process described with: . One allele is reported. No phenotypic data is available. N…
FBgn0040729	14.54	14.24	20.38	9.63	12.32	10.17	0.618067	0.0199079	0.591256		CG15126	=HYPERLINK("http://flybase.org/reports/FBgn0040729", "LINK")	This gene is referred to in FlyBase by the symbol Dmel\CG15126 (FBgn0040729). It is a protein_coding_gene from Dmel. It has one annotated transcript and one polypeptide. Gene sequence location is 2R:19690798..19691078. Its molecular function is unknown. The biological processes in which it is involved are not known. 3 alleles are reported. No phenotypic data is available. The phenotypic class of …
FBgn0261061	27.36	28.33	19.75	18.43	16.61	13.95	0.623892	0.0218461	0.61815		Sfp96F	=HYPERLINK("http://flybase.org/reports/FBgn0261061", "LINK")	The gene Seminal fluid protein 96F is referred to in FlyBase by the symbol Dmel\Sfp96F (CG42609, FBgn0261061). It is a protein_coding_gene from Dmel. It has one annotated transcript and one polypeptide. Gene sequence location is 3R:25830061..25830228. Its molecular function is described by: . It is involved in the biological process described with: multicellular organism reproduction. 3 alleles a…
FBgn0034523	6.74	5.63	5.65	4.66	3.79	3.23	0.625757	0.0203427	0.592896		Nnf1a	=HYPERLINK("http://flybase.org/reports/FBgn0034523", "LINK")	The gene Nnf1a is referred to in FlyBase by the symbol Dmel\Nnf1a (CG13434, FBgn0034523). It is a protein_coding_gene from Dmel. It has one annotated transcript and one polypeptide. Gene sequence location is 2R:20586222..20587238. Its molecular function is unknown. It is involved in the biological process described with: mitotic metaphase plate congression; chromosome segregation. 4 alleles are r…
FBgn0262989	5.99	4.61	4.43	3.29	3.79	2.72	0.625826	0.0206631	0.600005		lncRNA:CR43297	=HYPERLINK("http://flybase.org/reports/FBgn0262989", "LINK")	The gene long non-coding RNA:CR43297 is referred to in FlyBase by the symbol Dmel\lncRNA:CR43297 (CR43297, FBgn0262989). It is a non_protein_coding_gene from Dmel. It has one annotated transcript. Gene sequence location is X:8724674..8725901. Its molecular function is unknown. The biological processes in which it is involved are not known. No alleles are reported.
FBgn0044810	77.05	150.59	91.48	49.82	70.15	45.69	0.949367	6.52903e-05	0.00888062	UP	TotX	LINK	The gene Turandot X is referred to in FlyBase by the symbol Dmel\TotX (CG31193, FBgn0044810). It is a protein_coding_gene from Dmel. It has one annotated transcript and one polypeptide. Gene sequence location is 3R:20904917..20905518. Its molecular function is unknown. It is involved in the biological process described with: response to oxidative stress; response to bacterium; cellular response t…
FBgn0010039	32.8	30.74	20.02	15.66	21.13	17.4	0.630255	0.00273652	0.176069		GstD3	=HYPERLINK("http://flybase.org/reports/FBgn0010039", "LINK")	The gene Glutathione S transferase D3 is referred to in FlyBase by the symbol Dmel\GstD3 (CG4381, FBgn0010039). It is a protein_coding_gene from Dmel. It has one annotated transcript and one polypeptide. Gene sequence location is 3R:12373068..12373813. Its molecular function is described by: glutathione transferase activity. It is involved in the biological process described with: glutathione met…
FBgn0085244	59.04	88.32	66.54	34.35	40.28	36.41	0.948616	2.0465e-07	5.98737e-05	UP	CG34215	LINK	This gene is referred to in FlyBase by the symbol Dmel\CG34215 (FBgn0085244). It is a protein_coding_gene from Dmel. It has one annotated transcript and one polypeptide. Gene sequence location is 2R:6831296..6831793. Its molecular function is unknown. The biological processes in which it is involved are not known. One allele is reported. No phenotypic data is available. No phenotypic class data i…
FBgn0265270	63.49	81.63	47.09	38.93	43.17	41.82	0.63618	0.000823271	0.0709203		lncRNA:CR43239	=HYPERLINK("http://flybase.org/reports/FBgn0265270", "LINK")	The gene long non-coding RNA:CR43239 is referred to in FlyBase by the symbol Dmel\lncRNA:CR43239 (CR43239, FBgn0265270). It is a non_protein_coding_gene from Dmel. It has 3 annotated transcripts. Gene sequence location is 2L:17353730..17354668. Its molecular function is unknown. The biological processes in which it is involved are not known. No alleles are reported.
FBgn0267671	5.16	5.05	5.59	3	4.39	2.84	0.636205	0.0179432	0.556454		lncRNA:CR46007	=HYPERLINK("http://flybase.org/reports/FBgn0267671", "LINK")	The gene long non-coding RNA:CR46007 is referred to in FlyBase by the symbol Dmel\lncRNA:CR46007 (CR46007, FBgn0267671). It is a non_protein_coding_gene from Dmel. It has one annotated transcript. Gene sequence location is 3R:11033380..11034203. Its molecular function is unknown. The biological processes in which it is involved are not known. No alleles are reported.
FBgn0036767	7.44	12.79	10.58	4.61	6.59	8.66	0.63707	0.0226268	0.628756		CG16775	=HYPERLINK("http://flybase.org/reports/FBgn0036767", "LINK")	This gene is referred to in FlyBase by the symbol Dmel\CG16775 (FBgn0036767). It is a protein_coding_gene from Dmel. It has one annotated transcript and one polypeptide. Gene sequence location is 3L:17885948..17886645. Its molecular function is unknown. The biological processes in which it is involved are not known. 2 alleles are reported. No phenotypic data is available. The phenotypic classes o…
FBgn0040608	8.33	13.24	10.4	7.51	6.43	6.55	0.637375	0.00642139	0.312132		CG14246	=HYPERLINK("http://flybase.org/reports/FBgn0040608", "LINK")	This gene is referred to in FlyBase by the symbol Dmel\CG14246 (FBgn0040608). It is a protein_coding_gene from Dmel. It has 3 annotated transcripts and 3 polypeptides (1 unique). Gene sequence location is 3R:26727314..26730117. Its molecular function is described by: . It is involved in the biological process described with: . No alleles are reported. Summary of modENCODE Temporal Expression Prof…
FBgn0042126	2.76	2.73	2.14	1.52	1.81	1.58	0.642445	0.011442	0.439156		CG18788	=HYPERLINK("http://flybase.org/reports/FBgn0042126", "LINK")	This gene is referred to in FlyBase by the symbol Dmel\CG18788 (FBgn0042126). It is a protein_coding_gene from Dmel. It has one annotated transcript and one polypeptide. Gene sequence location is 2L:12034190..12036131. Its molecular function is described by: transmembrane transporter activity. It is involved in the biological process described with: transmembrane transport; anion transport. 2 all…
FBgn0037197	5.44	4.99	4.03	2.9	3.08	3.33	0.643429	0.023639	0.643063		CG13239	=HYPERLINK("http://flybase.org/reports/FBgn0037197", "LINK")	This gene is referred to in FlyBase by the symbol Dmel\CG13239 (FBgn0037197). It is a protein_coding_gene from Dmel. It has one annotated transcript and one polypeptide. Gene sequence location is 3L:22860787..22861490. Its molecular function is unknown. The biological processes in which it is involved are not known. 3 alleles are reported. No phenotypic data is available. The phenotypic class of …
FBgn0262033	6.59	6.65	7.11	5.06	4.31	3.63	0.644361	0.0228911	0.632707		lncRNA:CR42844	=HYPERLINK("http://flybase.org/reports/FBgn0262033", "LINK")	The gene long non-coding RNA:CR42844 is referred to in FlyBase by the symbol Dmel\lncRNA:CR42844 (CR42844, FBgn0262033). It is a non_protein_coding_gene from Dmel. It has one annotated transcript. Gene sequence location is 2L:9304437..9305007. Its molecular function is unknown. The biological processes in which it is involved are not known. No alleles are reported.
FBgn0267728	2.01	1.43	1.52	1.14	1.1	0.93	0.654422	0.0267171	0.679892		otk2	=HYPERLINK("http://flybase.org/reports/FBgn0267728", "LINK")	The gene off-track2 is referred to in FlyBase by the symbol Dmel\otk2 (CG8964, FBgn0267728). It is a protein_coding_gene from Dmel. It has one annotated transcript and one polypeptide. Gene sequence location is 2R:12023146..12025272. Its molecular function is described by: protein heterodimerization activity; protein homodimerization activity; Wnt-protein binding. It is involved in the biological…
FBgn0038412	8.74	4.33	5.19	3.68	4.24	3.73	0.654526	0.00865511	0.364691		Zip89B	=HYPERLINK("http://flybase.org/reports/FBgn0038412", "LINK")	The gene Zinc/iron regulated transporter-related protein 89B is referred to in FlyBase by the symbol Dmel\Zip89B (CG6898, FBgn0038412). It is a protein_coding_gene from Dmel. It has one annotated transcript and one polypeptide. Gene sequence location is 3R:16305758..16308700. Its molecular function is described by: zinc ion transmembrane transporter activity. It is involved in the biological proc…
FBgn0259949	27.62	31.24	20.61	19.72	17.82	12.95	0.654959	0.00603212	0.303513		Sfp23F	=HYPERLINK("http://flybase.org/reports/FBgn0259949", "LINK")	The gene Seminal fluid protein 23F is referred to in FlyBase by the symbol Dmel\Sfp23F (CG42459, FBgn0259949). It is a protein_coding_gene from Dmel. It has one annotated transcript and one polypeptide. Gene sequence location is 2L:3387354..3387743. Its molecular function is described by: serine-type endopeptidase inhibitor activity. It is involved in the biological process described with: negati…
FBgn0037634	8.67	7.08	7.85	4.42	4.07	6.48	0.660728	0.00324455	0.199643		hng2	=HYPERLINK("http://flybase.org/reports/FBgn0037634", "LINK")	The gene hinge2 is referred to in FlyBase by the symbol Dmel\hng2 (CG8359, FBgn0037634). It is a protein_coding_gene from Dmel. It has one annotated transcript and one polypeptide. Gene sequence location is 3R:8806322..8807581. Its molecular function is described by: DNA binding. It is involved in the biological process described with: regulation of transcription by RNA polymerase II. 9 alleles a…
FBgn0034331	335.77	540.22	419.66	173.29	230.1	272.13	0.942838	2.45389e-06	0.000514189	UP	CG15067	LINK	The gene Bomanin Bicipital 2 is referred to in FlyBase by the symbol Dmel\BomBc2 (CG15067, FBgn0034331). It is a protein_coding_gene from Dmel. It has 2 annotated transcripts and 2 polypeptides (1 unique). Gene sequence location is 2R:18384824..18385589. Its molecular function is unknown. The biological processes in which it is involved are not known. 5 alleles are reported. The phenotypes of the…
FBgn0264330	13.23	15.45	11.02	9.72	8.69	6.5	0.671101	0.028429	0.701923		CG43789	=HYPERLINK("http://flybase.org/reports/FBgn0264330", "LINK")	This gene is referred to in FlyBase by the symbol Dmel\CG43789 (FBgn0264330). It is a protein_coding_gene from Dmel. It has one annotated transcript and one polypeptide. Gene sequence location is 2R:16938696..16938995. Its molecular function is described by: . It is involved in the biological process described with: . No alleles are reported.
FBgn0040363	1.28	1.03	0.92	0.8	0.57	0.65	0.671363	0.048593	0.862014		CG11384	=HYPERLINK("http://flybase.org/reports/FBgn0040363", "LINK")	This gene is referred to in FlyBase by the symbol Dmel\CG11384 (FBgn0040363). It is a protein_coding_gene from Dmel. It has one annotated transcript and one polypeptide. Gene sequence location is X:1173877..1176035. Its molecular function is unknown. The biological processes in which it is involved are not known. 2 alleles are reported. No phenotypic data is available. No phenotypic class data is…
FBgn0033519	3.53	1.8	1.82	1.55	1.56	1.42	0.671958	0.0481647	0.859497		CG11825	=HYPERLINK("http://flybase.org/reports/FBgn0033519", "LINK")	This gene is referred to in FlyBase by the symbol Dmel\CG11825 (FBgn0033519). It is a protein_coding_gene from Dmel. It has 3 annotated transcripts and 3 polypeptides (all unique). Gene sequence location is 2R:10420414..10423650. Its molecular function is unknown. It is involved in the biological process described with: copper ion homeostasis; mitochondrial respirasome assembly. 8 alleles are rep…
FBgn0050110	6.33	4.38	7.22	3.02	3.43	3.36	0.875361	5.48489e-05	0.00752643	UP	CG30110	LINK	This gene is referred to in FlyBase by the symbol Dmel\CG30110 (FBgn0050110). It is a protein_coding_gene from Dmel. It has one annotated transcript and one polypeptide. Gene sequence location is 2R:17880194..17882245. Its molecular function is described by: . It is involved in the biological process described with: . One allele is reported. No phenotypic data is available. The phenotypic class o…
FBgn0037782	34.12	51.64	27.93	23.84	27.6	19.85	0.67605	0.00273414	0.176069		Npc2d	=HYPERLINK("http://flybase.org/reports/FBgn0037782", "LINK")	The gene Niemann-Pick type C-2d is referred to in FlyBase by the symbol Dmel\Npc2d (CG12813, FBgn0037782). It is a protein_coding_gene from Dmel. It has one annotated transcript and one polypeptide. Gene sequence location is 3R:10055356..10056083. Its molecular function is described by: sterol binding. It is involved in the biological process described with: sterol transport; intracellular choles…
FBgn0046876	4.77	7.14	5.46	3.48	4.42	2.96	0.680369	0.0106475	0.419036		Obp83ef	=HYPERLINK("http://flybase.org/reports/FBgn0046876", "LINK")	The gene Odorant-binding protein 83ef is referred to in FlyBase by the symbol Dmel\Obp83ef (CG31557, FBgn0046876). It is a protein_coding_gene from Dmel. It has one annotated transcript and one polypeptide. Gene sequence location is 3R:6109642..6111034. Its molecular function is described by: odorant binding. It is involved in the biological process described with: sensory perception of chemical …
FBgn0262839	8.61	7.55	8.02	4.67	5.63	4.86	0.681362	0.00214717	0.152855		CG43203	=HYPERLINK("http://flybase.org/reports/FBgn0262839", "LINK")	This gene is referred to in FlyBase by the symbol Dmel\CG43203 (FBgn0262839). It is a protein_coding_gene from Dmel. It has one annotated transcript and one polypeptide. Gene sequence location is 3R:19354051..19354884. Its molecular function is described by: . It is involved in the biological process described with: . No alleles are reported.
FBgn0259832	17.6	20.08	13.78	12.16	10.14	9.69	0.685087	0.0022431	0.154758		CG34229	=HYPERLINK("http://flybase.org/reports/FBgn0259832", "LINK")	This gene is referred to in FlyBase by the symbol Dmel\CG34229 (FBgn0259832). It is a protein_coding_gene from Dmel. It has one annotated transcript and one polypeptide. Gene sequence location is 2R:11841608..11842164. Its molecular function is unknown. The biological processes in which it is involved are not known. 7 alleles are reported. No phenotypic data is available. No phenotypic class data…
FBgn0262140	11.51	13.15	8.37	7	8.85	4.77	0.685729	0.0210766	0.606333		CG42866	=HYPERLINK("http://flybase.org/reports/FBgn0262140", "LINK")	This gene is referred to in FlyBase by the symbol Dmel\CG42866 (FBgn0262140). It is a protein_coding_gene from Dmel. It has one annotated transcript and one polypeptide. Gene sequence location is 2L:19961224..19961685. Its molecular function is described by: . It is involved in the biological process described with: . No alleles are reported.
FBgn0264552	14.77	15.68	10.19	9.08	8.15	5.21	0.858036	0.00040745	0.0415653	UP	CG43931	LINK	This gene is referred to in FlyBase by the symbol Dmel\CG43931 (FBgn0264552). It is a protein_coding_gene from Dmel. It has one annotated transcript and one polypeptide. Gene sequence location is 3L:20897557..20898501. Its molecular function is described by: . It is involved in the biological process described with: . No alleles are reported.
FBgn0262149	2.92	4.38	3.22	2.16	2.41	1.95	0.687939	0.0295446	0.70347		lncRNA:CR42875	=HYPERLINK("http://flybase.org/reports/FBgn0262149", "LINK")	This gene is referred to in FlyBase by the symbol Dmel\CR42875 (FBgn0262149). It is a pseudogene_attribute from Dmel. It has one annotated transcript. Gene sequence location is 3R:7128087..7129166. Its molecular function is unknown. The biological processes in which it is involved are not known. No alleles are reported.
FBgn0263024	78.84	126.29	77.89	75.78	65.07	34.52	0.691226	0.010288	0.41221		CG43319	=HYPERLINK("http://flybase.org/reports/FBgn0263024", "LINK")	This gene is referred to in FlyBase by the symbol Dmel\CG43319 (FBgn0263024). It is a protein_coding_gene from Dmel. It has one annotated transcript and one polypeptide. Gene sequence location is 3R:27694318..27694541. Its molecular function is described by: . It is involved in the biological process described with: multicellular organism reproduction. 2 alleles are reported. No phenotypic data i…
FBgn0011669	682.18	897.07	466.04	570.73	424.39	271.31	0.693715	0.00656125	0.316313		Mst57Db	=HYPERLINK("http://flybase.org/reports/FBgn0011669", "LINK")	The gene Male-specific RNA 57Db is referred to in FlyBase by the symbol Dmel\Mst57Db (CG5016, FBgn0011669). It is a protein_coding_gene from Dmel. It has one annotated transcript and one polypeptide. Gene sequence location is 3R:25830720..25830914. Its molecular function is described by: . It is involved in the biological process described with: regulation of female receptivity; multicellular org…
FBgn0262972	0.36	0.23	0.33	0.2	0.17	0.2	0.694222	0.0351321	0.7619		lncRNA:CR43283	=HYPERLINK("http://flybase.org/reports/FBgn0262972", "LINK")	The gene cherub is referred to in FlyBase by the symbol Dmel\lncRNA:cherub (CR43283, FBgn0262972). It is a non_protein_coding_gene from Dmel. It has 3 annotated transcripts. Gene sequence location is 3R:11247631..11256123. Its molecular function is unknown. The biological processes in which it is involved are not known. 5 alleles are reported. No phenotypic data is available. The phenotypic class…
FBgn0035743	3.11	2.95	3.53	1.91	2.15	1.88	0.694518	0.0383179	0.786963		CG15829	=HYPERLINK("http://flybase.org/reports/FBgn0035743", "LINK")	The gene Acyl-CoA binding protein 6 is referred to in FlyBase by the symbol Dmel\Acbp6 (CG15829, FBgn0035743). It is a protein_coding_gene from Dmel. It has 2 annotated transcripts and 2 polypeptides (1 unique). Gene sequence location is 3L:7128903..7129673. Its molecular function is described by: fatty-acyl-CoA binding. The biological processes in which it is involved are not known. 4 alleles ar…
FBgn0083972	21.28	15.02	15.09	8.38	10.62	9.69	0.849033	5.39356e-05	0.00746719	UP	CG34136	LINK	This gene is referred to in FlyBase by the symbol Dmel\CG34136 (FBgn0083972). It is a protein_coding_gene from Dmel. It has one annotated transcript and one polypeptide. Gene sequence location is 2L:21096922..21098932. Its molecular function is unknown. The biological processes in which it is involved are not known. 4 alleles are reported. No phenotypic data is available. No phenotypic class data…
FBgn0010222	50.92	70.4	63.55	24.54	46.4	43.49	0.695457	0.00144334	0.111902		Nmdmc	=HYPERLINK("http://flybase.org/reports/FBgn0010222", "LINK")	The gene NAD-dependent methylenetetrahydrofolate dehydrogenase is referred to in FlyBase by the symbol Dmel\Nmdmc (CG18466, FBgn0010222). It is a protein_coding_gene from Dmel. It has 3 annotated transcripts and 3 polypeptides (2 unique). Gene sequence location is 3R:9042508..9050555. Its molecular function is described by: phosphate ion binding; magnesium ion binding; methenyltetrahydrofolate cy…
FBgn0050382	10.06	11.25	8.04	6.05	6.35	5.71	0.699242	0.000738167	0.0660732		CG30382	=HYPERLINK("http://flybase.org/reports/FBgn0050382", "LINK")	The gene Proteasome alpha1 subunit-related is referred to in FlyBase by the symbol Dmel\Prosalpha1R (CG30382, FBgn0050382). It is a protein_coding_gene from Dmel. It has 2 annotated transcripts and 2 polypeptides (1 unique). Gene sequence location is 2R:7830413..7831771. Its molecular function is described by: threonine-type endopeptidase activity. It is involved in the biological process describ…
FBgn0036362	11.42	7.41	3.73	5.59	3.66	4.65	0.700412	0.0370738	0.779252		CG10725	=HYPERLINK("http://flybase.org/reports/FBgn0036362", "LINK")	This gene is referred to in FlyBase by the symbol Dmel\CG10725 (FBgn0036362). It is a protein_coding_gene from Dmel. It has one annotated transcript and one polypeptide. Gene sequence location is 3L:13437954..13439009. Its molecular function is described by: chitin binding. It is involved in the biological process described with: chitin metabolic process. 4 alleles are reported. No phenotypic dat…
FBgn0262623	1711.52	2009.66	1283.06	1320.33	1171.77	590.62	0.701179	0.00447755	0.245122		CG43147	=HYPERLINK("http://flybase.org/reports/FBgn0262623", "LINK")	This gene is referred to in FlyBase by the symbol Dmel\CG43147 (FBgn0262623). It is a protein_coding_gene from Dmel. It has 2 annotated transcripts and 2 polypeptides (1 unique). Gene sequence location is 3L:13299841..13300152. Its molecular function is described by: . It is involved in the biological process described with: . No alleles are reported.
FBgn0053552	4.97	4.67	3.53	2.89	2.23	2.97	0.703764	0.0162285	0.524249		CG33552	=HYPERLINK("http://flybase.org/reports/FBgn0053552", "LINK")	This gene is referred to in FlyBase by the symbol Dmel\CG33552 (FBgn0053552). It is a protein_coding_gene from Dmel. It has one annotated transcript and one polypeptide. Gene sequence location is 2L:16682503..16683290. Its molecular function is described by: ubiquitin-protein transferase activity; ubiquitin protein ligase activity; zinc ion binding. It is involved in the biological process descri…
novel.103	1.13	1.11	1.08	0.91	0.53	0.58	0.705899	0.0346923	0.756993		-	=HYPERLINK("http://flybase.org/reports/novel.103", "LINK")
FBgn0262099	190.59	233.41	125.53	158.71	98.99	78.95	0.707425	0.00659452	0.316578		CG42852	=HYPERLINK("http://flybase.org/reports/FBgn0262099", "LINK")	This gene is referred to in FlyBase by the symbol Dmel\CG42852 (FBgn0262099). It is a protein_coding_gene from Dmel. It has one annotated transcript and one polypeptide. Gene sequence location is 3L:16755489..16755720. Its molecular function is described by: . It is involved in the biological process described with: . No alleles are reported.
FBgn0265635	1.7	2.2	1.85	1.14	0.99	1.36	0.711621	0.0302365	0.711457		lncRNA:CR44442	=HYPERLINK("http://flybase.org/reports/FBgn0265635", "LINK")	The gene long non-coding RNA:CR44442 is referred to in FlyBase by the symbol Dmel\lncRNA:CR44442 (CR44442, FBgn0265635). It is a non_protein_coding_gene from Dmel. It has one annotated transcript. Gene sequence location is 2R:6820560..6822596. Its molecular function is unknown. The biological processes in which it is involved are not known. No alleles are reported.
FBgn0038654	3.65	3.96	3.79	2.91	2.78	1.23	0.717644	0.0320597	0.728433		CG14298	=HYPERLINK("http://flybase.org/reports/FBgn0038654", "LINK")	This gene is referred to in FlyBase by the symbol Dmel\CG14298 (FBgn0038654). It is a protein_coding_gene from Dmel. It has 2 annotated transcripts and 2 polypeptides (1 unique). Gene sequence location is 3R:18875528..18877204. Its molecular function is described by: serine-type endopeptidase inhibitor activity. The biological processes in which it is involved are not known. 4 alleles are reporte…
FBgn0038279	1.98	2.77	2.92	1.44	1.8	1.43	0.718397	0.000965884	0.0813967		Sdr	=HYPERLINK("http://flybase.org/reports/FBgn0038279", "LINK")	The gene Secreted decoy of InR is referred to in FlyBase by the symbol Dmel\Sdr (CG3837, FBgn0038279). It is a protein_coding_gene from Dmel. It has 2 annotated transcripts and 2 polypeptides (1 unique). Gene sequence location is 3R:14918628..14923083. Its molecular function is described by: insulin-like growth factor binding. It is involved in the biological process described with: negative regu…
FBgn0033067	47.94	70.05	36.64	33.38	27.98	24.97	0.842151	0.000172077	0.0203682	UP	CG11211	LINK	This gene is referred to in FlyBase by the symbol Dmel\CG11211 (FBgn0033067). It is a protein_coding_gene from Dmel. It has one annotated transcript and one polypeptide. Gene sequence location is 2R:6180926..6181626. Its molecular function is described by: signaling receptor activity; carbohydrate binding. The biological processes in which it is involved are not known. 4 alleles are reported. No …
FBgn0030334	3.1	3.21	2.61	1.75	2.12	1.54	0.72518	0.000821573	0.0709203		Karl	=HYPERLINK("http://flybase.org/reports/FBgn0030334", "LINK")	The gene Karl is referred to in FlyBase by the symbol Dmel\Karl (CG4139, FBgn0030334). It is a protein_coding_gene from Dmel. It has 4 annotated transcripts and 4 polypeptides (1 unique). Gene sequence location is X:11787381..11792253. Its molecular function is described by: . It is involved in the biological process described with: lipid metabolic process; response to reactive oxygen species. 9 …
FBgn0265539	165.54	172.91	116.14	130.67	92.87	51.55	0.725774	0.00608195	0.304041		lncRNA:CR44389	=HYPERLINK("http://flybase.org/reports/FBgn0265539", "LINK")	The gene long non-coding RNA:CR44389 is referred to in FlyBase by the symbol Dmel\lncRNA:CR44389 (CR44389, FBgn0265539). It is a non_protein_coding_gene from Dmel. It has one annotated transcript. Gene sequence location is 2R:17188796..17189095. Its molecular function is unknown. The biological processes in which it is involved are not known. No alleles are reported.
FBgn0265883	6.8	11.75	7.99	5.13	6.63	4.29	0.726401	0.0237216	0.644182		lncRNA:CR44672	=HYPERLINK("http://flybase.org/reports/FBgn0265883", "LINK")	The gene long non-coding RNA:CR44672 is referred to in FlyBase by the symbol Dmel\lncRNA:CR44672 (CR44672, FBgn0265883). It is a non_protein_coding_gene from Dmel. It has one annotated transcript. Gene sequence location is 3L:18475298..18475679. Its molecular function is unknown. The biological processes in which it is involved are not known. No alleles are reported.
FBgn0052819	1.44	1.45	1.55	1.13	0.83	0.7	0.730729	0.012253	0.451382		CG32819	=HYPERLINK("http://flybase.org/reports/FBgn0052819", "LINK")	This gene is referred to in FlyBase by the symbol Dmel\CG32819 (FBgn0052819). It is a protein_coding_gene from Dmel. It has 2 annotated transcripts and 2 polypeptides (all unique). Gene sequence location is X:21617889..21621104. Its molecular function is described by: structural constituent of cytoskeleton. It is involved in the biological process described with: microtubule nucleation; flagellat…
FBgn0004854	1.07	1.77	1.87	0.76	0.82	1.25	0.733272	0.0148321	0.499971		B-H2	=HYPERLINK("http://flybase.org/reports/FBgn0004854", "LINK")	The gene BarH2 is referred to in FlyBase by the symbol Dmel\B-H2 (CG5488, FBgn0004854). It is a protein_coding_gene from Dmel. It has 2 annotated transcripts and 2 polypeptides (all unique). Gene sequence location is X:17314581..17324175. Its molecular function is described by: DNA-binding transcription factor activity, RNA polymerase II-specific; DNA-binding transcription activator activity, RNA…
FBgn0085330	12.75	18.5	13.95	13.66	8.76	4.58	0.735464	0.0330393	0.73926		CG34301	=HYPERLINK("http://flybase.org/reports/FBgn0085330", "LINK")	This gene is referred to in FlyBase by the symbol Dmel\CG34301 (FBgn0085330). It is a protein_coding_gene from Dmel. It has one annotated transcript and one polypeptide. Gene sequence location is 3R:8773435..8773810. Its molecular function is unknown. The biological processes in which it is involved are not known. One allele is reported. No phenotypic data is available. No phenotypic class data i…
FBgn0052640	41.46	49.33	36.06	22.88	20.96	27.05	0.841097	5.32262e-06	0.00098253	UP	CG32640	LINK	This gene is referred to in FlyBase by the symbol Dmel\CG32640 (FBgn0052640). It is a protein_coding_gene from Dmel. It has one annotated transcript and one polypeptide. Gene sequence location is X:13178005..13178523. Its molecular function is unknown. The biological processes in which it is involved are not known. One allele is reported. No phenotypic data is available. The phenotypic classes of…
FBgn0040735	164.44	295.03	205.28	138.69	155.34	105.71	0.736477	0.00056151	0.0530901		CG16836	=HYPERLINK("http://flybase.org/reports/FBgn0040735", "LINK")	The gene Bomanin Tailed 2 is referred to in FlyBase by the symbol Dmel\BomT2 (CG16836, FBgn0040735). It is a protein_coding_gene from Dmel. It has one annotated transcript and one polypeptide. Gene sequence location is 2R:18388995..18389443. Its molecular function is unknown. The biological processes in which it is involved are not known. 5 alleles are reported. No phenotypic data is available. T…
FBgn0031389	4.01	6.46	4.7	2.6	3.1	3.41	0.736975	0.00152793	0.116137		CG4259	=HYPERLINK("http://flybase.org/reports/FBgn0031389", "LINK")	This gene is referred to in FlyBase by the symbol Dmel\CG4259 (FBgn0031389). It is a protein_coding_gene from Dmel. It has 2 annotated transcripts and 2 polypeptides (1 unique). Gene sequence location is 2L:2127309..2129237. Its molecular function is unknown. It is involved in the biological process described with: proteolysis. 5 alleles are reported. No phenotypic data is available. The phenotyp…
FBgn0038034	5.36	8.62	8.69	3.94	4.92	4.73	0.740014	0.000681264	0.0626814		Cyp9f3	=HYPERLINK("http://flybase.org/reports/FBgn0038034", "LINK")	The gene Cyp9f3 is referred to in FlyBase by the symbol Dmel\Cyp9f3 (CG17875, FBgn0038034). It is a protein_coding_gene from Dmel. It has one annotated transcript and one polypeptide. Gene sequence location is 3R:12396007..12398929. Its molecular function is described by: iron ion binding; monooxygenase activity; heme binding; oxidoreductase activity, acting on paired donors, with incorporation o…
FBgn0052598	2.82	2.18	2.49	1.46	1.71	1.31	0.750885	0.0235124	0.642936		betaNACtes6	=HYPERLINK("http://flybase.org/reports/FBgn0052598", "LINK")	The gene Nascent-associated complex beta-subunit-like, testis 6 is referred to in FlyBase by the symbol Dmel\betaNACtes6 (CG32598, FBgn0052598). It is a protein_coding_gene from Dmel. It has one annotated transcript and one polypeptide. Gene sequence location is X:14316130..14317150. Its molecular function is described by: . It is involved in the biological process described with: . 2 alleles are…
FBgn0260482	2.11	2.19	1.48	1.3	1.17	0.95	0.753377	0.0287523	0.701923		CG32599	=HYPERLINK("http://flybase.org/reports/FBgn0260482", "LINK")	This gene is referred to in FlyBase by the symbol Dmel\CG32599 (FBgn0260482). It is a protein_coding_gene from Dmel. It has one annotated transcript and one polypeptide. Gene sequence location is X:14243686..14246514. Its molecular function is described by: . It is involved in the biological process described with: . 4 alleles are reported. No phenotypic data is available. The phenotypic class of…
FBgn0029765	101.28	203.7	180.59	88.86	100.7	98.85	0.754384	0.000515026	0.0500525		CG16756	=HYPERLINK("http://flybase.org/reports/FBgn0029765", "LINK")	This gene is referred to in FlyBase by the symbol Dmel\CG16756 (FBgn0029765). It is a protein_coding_gene from Dmel. It has one annotated transcript and one polypeptide. Gene sequence location is X:5427517..5428217. Its molecular function is described by: lysozyme activity. It is involved in the biological process described with: defense response to Gram-negative bacterium. 4 alleles are reported…
FBgn0028949	10.79	22.5	12.95	11.38	8.1	7.83	0.757461	0.00487171	0.258443		CG15254	=HYPERLINK("http://flybase.org/reports/FBgn0028949", "LINK")	This gene is referred to in FlyBase by the symbol Dmel\CG15254 (FBgn0028949). It is a protein_coding_gene from Dmel. It has 2 annotated transcripts and 2 polypeptides (1 unique). Gene sequence location is 2L:15613905..15614828. Its molecular function is described by: metalloendopeptidase activity; zinc ion binding. It is involved in the biological process described with: proteolysis. 4 alleles ar…
FBgn0029795	2.41	2.33	3.57	1.05	2.05	1.84	0.757684	0.0121727	0.451382		CG15773	=HYPERLINK("http://flybase.org/reports/FBgn0029795", "LINK")	This gene is referred to in FlyBase by the symbol Dmel\CG15773 (FBgn0029795). It is a protein_coding_gene from Dmel. It has 2 annotated transcripts and 2 polypeptides (all unique). Gene sequence location is X:5732740..5734614. Its molecular function is unknown. The biological processes in which it is involved are not known. 3 alleles are reported. No phenotypic data is available. No phenotypic cl…
FBgn0051679	21.51	16.61	17.49	11.3	11.09	8.79	0.837573	3.42869e-06	0.000672978	UP	Tengl3	LINK	The gene Testis EndoG-Like 3 is referred to in FlyBase by the symbol Dmel\Tengl3 (CG31679, FBgn0051679). It is a protein_coding_gene from Dmel. It has one annotated transcript and one polypeptide. Gene sequence location is 2L:2237076..2238251. Its molecular function is described by 6 unique terms, many of which group under: hydrolase activity; catalytic activity; nuclease activity; endonuclease a…
FBgn0050160	2.67	4.29	3.74	2.04	2.14	2.11	0.762663	0.0153492	0.507555		CG30160	=HYPERLINK("http://flybase.org/reports/FBgn0050160", "LINK")	This gene is referred to in FlyBase by the symbol Dmel\CG30160 (FBgn0050160). It is a protein_coding_gene from Dmel. It has one annotated transcript and one polypeptide. Gene sequence location is 2R:7005157..7006136. Its molecular function is unknown. The biological processes in which it is involved are not known. One allele is reported. No phenotypic data is available. No phenotypic class data i…
FBgn0002789	413.02	300.98	225.83	177.32	182.06	172.61	0.822864	1.55851e-05	0.00251732	UP	Mp20	LINK	The gene Muscle protein 20 is referred to in FlyBase by the symbol Dmel\Mp20 (CG4696, FBgn0002789). It is a protein_coding_gene from Dmel. It has 2 annotated transcripts and 2 polypeptides (all unique). Gene sequence location is 2R:13246670..13248880. Its molecular function is unknown. It is involved in the biological process described with: myoblast fusion; regulation of myoblast fusion. 9 allel…
FBgn0029827	14.48	26.16	14.56	14.42	9.37	8.66	0.765416	0.00305734	0.190441		CG6048	=HYPERLINK("http://flybase.org/reports/FBgn0029827", "LINK")	This gene is referred to in FlyBase by the symbol Dmel\CG6048 (FBgn0029827). It is a protein_coding_gene from Dmel. It has one annotated transcript and one polypeptide. Gene sequence location is X:5952565..5954046. Its molecular function is described by: serine-type endopeptidase activity. It is involved in the biological process described with: proteolysis; regulation of terminal button organiza…
FBgn0085256	203.65	243.8	249.4	117.52	174.57	104.83	0.81489	1.8688e-05	0.00298738	UP	CG34227	LINK	This gene is referred to in FlyBase by the symbol Dmel\CG34227 (FBgn0085256). It is a protein_coding_gene from Dmel. It has one annotated transcript and one polypeptide. Gene sequence location is 2R:11248126..11248610. Its molecular function is unknown. The biological processes in which it is involved are not known. 2 alleles are reported. No phenotypic data is available. The phenotypic class of …
FBgn0030294	6.87	9.27	8.65	4.21	4.6	5.35	0.808442	3.82927e-05	0.00554922	UP	Pa1	LINK
FBgn0259936	3	2.85	1.73	1.69	1.24	1.51	0.772127	0.0379031	0.78155		Uhg3	=HYPERLINK("http://flybase.org/reports/FBgn0259936", "LINK")	The gene U snoRNA host gene 3 is referred to in FlyBase by the symbol Dmel\Uhg3 (CR32957, FBgn0259936). It is a non_protein_coding_gene from Dmel. It has 3 annotated transcripts. Gene sequence location is 2L:20647533..20648848. Its molecular function is unknown. The biological processes in which it is involved are not known. One allele is reported. No phenotypic data is available. No phenotypic c…
FBgn0030013	25.26	29.52	31.5	16.95	14.27	18.25	0.80317	3.83009e-07	9.73597e-05	UP	GIIIspla2	LINK	The gene Phospholipase A2 group III is referred to in FlyBase by the symbol Dmel\GIIIspla2 (CG1583, FBgn0030013). It is a protein_coding_gene from Dmel. It has 2 annotated transcripts and 2 polypeptides (1 unique). Gene sequence location is X:8157628..8159348. Its molecular function is described by: calcium-dependent phospholipase A2 activity. It is involved in the biological process described wi…
FBgn0286075	10.69	11.42	10.65	5.74	6.11	7.11	0.792135	2.334e-07	6.3493e-05	UP	DNAlig3	LINK	The gene DNA ligase 3 is referred to in FlyBase by the symbol Dmel\DNAlig3 (CG17227, FBgn0286075). It is a protein_coding_gene from Dmel. It has one annotated transcript and one polypeptide. Gene sequence location is 3R:12399011..12401839. Its molecular function is described by: DNA ligase (ATP) activity; DNA binding; ATP binding. It is involved in the biological process described with 8 unique t…
FBgn0032620	1.83	1.9	0.89	1.2	0.73	0.75	0.779549	0.045098	0.835018		CG12288	=HYPERLINK("http://flybase.org/reports/FBgn0032620", "LINK")	This gene is referred to in FlyBase by the symbol Dmel\CG12288 (FBgn0032620). It is a protein_coding_gene from Dmel. It has one annotated transcript and one polypeptide. Gene sequence location is 2L:16900535..16902218. Its molecular function is described by: nucleic acid binding; mRNA binding. The biological processes in which it is involved are not known. 2 alleles are reported. No phenotypic da…
FBgn0031295	153.05	117.73	123.1	79.44	76.92	72.03	0.788446	4.46641e-08	1.44284e-05	UP	CG4375	LINK	This gene is referred to in FlyBase by the symbol Dmel\CG4375 (FBgn0031295). It is a protein_coding_gene from Dmel. It has one annotated transcript and one polypeptide. Gene sequence location is 2L:1026105..1026897. Its molecular function is unknown. The biological processes in which it is involved are not known. 3 alleles are reported. No phenotypic data is available. The phenotypic class of all…
FBgn0036796	14.07	21.87	15.77	8.18	9.98	12.11	0.775722	0.000192442	0.0224361	UP	CG18231	LINK	This gene is referred to in FlyBase by the symbol Dmel\CG18231 (FBgn0036796). It is a protein_coding_gene from Dmel. It has one annotated transcript and one polypeptide. Gene sequence location is 3L:18607462..18609512. Its molecular function is described by: oxidoreductase activity, acting on single donors with incorporation of molecular oxygen, incorporation of two atoms of oxygen; procollagen-p…
FBgn0036690	2.7	2.81	3.27	1.27	1.97	1.84	0.802398	0.0163895	0.526965		Ilp8	=HYPERLINK("http://flybase.org/reports/FBgn0036690", "LINK")	The gene Insulin-like peptide 8 is referred to in FlyBase by the symbol Dmel\Ilp8 (CG14059, FBgn0036690). It is a protein_coding_gene from Dmel. It has one annotated transcript and one polypeptide. Gene sequence location is 3L:17029812..17032080. Its molecular function is described by: insulin receptor binding. It is involved in the biological process described with 8 unique terms, many of which …
FBgn0036815	9.42	11.48	9.41	5.96	6.07	5.7	0.773849	3.13495e-05	0.00462957	UP	HipHop	LINK	The gene HP1-HOAP-interacting protein is referred to in FlyBase by the symbol Dmel\HipHop (CG6874, FBgn0036815). It is a protein_coding_gene from Dmel. It has 2 annotated transcripts and 2 polypeptides (1 unique). Gene sequence location is 3L:18821171..18822353. Its molecular function is unknown. It is involved in the biological process described with: CENP-A containing nucleosome assembly; prote…
FBgn0004429	52.03	49.43	26.54	30.47	23.11	19.81	0.803898	0.0010469	0.0868085		LysP	=HYPERLINK("http://flybase.org/reports/FBgn0004429", "LINK")	The gene Lysozyme P is referred to in FlyBase by the symbol Dmel\LysP (CG9116, FBgn0004429). It is a protein_coding_gene from Dmel. It has one annotated transcript and one polypeptide. Gene sequence location is 3L:1218082..1218696. Its molecular function is described by: lysozyme activity. It is involved in the biological process described with: defense response to Gram-negative bacterium. 6 alle…
FBgn0033446	700.25	1272.23	759.04	635.67	479.25	488.61	0.771586	0.000287799	0.0321051	UP	CG1648	LINK	This gene is referred to in FlyBase by the symbol Dmel\CG1648 (FBgn0033446). It is a protein_coding_gene from Dmel. It has 3 annotated transcripts and 3 polypeptides (2 unique). Gene sequence location is 2R:9810974..9820053. Its molecular function is unknown. The biological processes in which it is involved are not known. 6 alleles are reported. The phenotypes of these alleles manifest in: mesoth…
FBgn0034296	168.02	83.45	102.51	48.81	71.97	81.26	0.811273	0.000769063	0.0673734		CG10912	=HYPERLINK("http://flybase.org/reports/FBgn0034296", "LINK")	This gene is referred to in FlyBase by the symbol Dmel\CG10912 (FBgn0034296). It is a protein_coding_gene from Dmel. It has one annotated transcript and one polypeptide. Gene sequence location is 2R:18056064..18057065. Its molecular function is unknown. It is involved in the biological process described with: cold acclimation. 3 alleles are reported. No phenotypic data is available. The phenotypi…
FBgn0085485	9.77	6.9	4.27	3.75	4.62	3.66	0.811368	0.0108659	0.421945		CG34456	=HYPERLINK("http://flybase.org/reports/FBgn0085485", "LINK")	This gene is referred to in FlyBase by the symbol Dmel\CG34456 (FBgn0085485). It is a protein_coding_gene from Dmel. It has one annotated transcript and one polypeptide. Gene sequence location is 3L:9362108..9362734. Its molecular function is unknown. The biological processes in which it is involved are not known. One allele is reported. No phenotypic data is available. No phenotypic class data i…
FBgn0052673	1.58	3.1	2.83	1.37	0.87	2	0.814752	0.0451235	0.835018		Rab9E	=HYPERLINK("http://flybase.org/reports/FBgn0052673", "LINK")	The gene Rab at 9E is referred to in FlyBase by the symbol Dmel\Rab9E (CG32673, FBgn0052673). It is a protein_coding_gene from Dmel. It has one annotated transcript and one polypeptide. Gene sequence location is X:10660955..10661843. Its molecular function is described by: GTP binding; GTPase activity. It is involved in the biological process described with 7 unique terms, many of which group und…
FBgn0038160	6.95	4.74	5.08	2.95	3.31	3.65	0.765757	0.00023891	0.0270404	UP	CG9759	LINK	This gene is referred to in FlyBase by the symbol Dmel\CG9759 (FBgn0038160). It is a protein_coding_gene from Dmel. It has 3 annotated transcripts and 3 polypeptides (1 unique). Gene sequence location is 3R:13607078..13609246. Its molecular function is unknown. The biological processes in which it is involved are not known. 2 alleles are reported. No phenotypic data is available. The phenotypic c…
FBgn0283434	1.72	1.22	1.23	0.88	0.84	0.65	0.81855	0.0090474	0.375104		CG46277	=HYPERLINK("http://flybase.org/reports/FBgn0283434", "LINK")	The gene Sperm-specific dynein intermediate chain C is referred to in FlyBase by the symbol Dmel\SdicC (CG46277, FBgn0283434). It is a protein_coding_gene from Dmel. It has one annotated transcript and one polypeptide. Gene sequence location is X:20212738..20217259. Its molecular function is described by: dynein light chain binding; dynein heavy chain binding. It is involved in the biological pro…
FBgn0035193	3.76	4.51	4.73	2.94	2.18	2.21	0.820401	0.00133088	0.105289		CG9192	=HYPERLINK("http://flybase.org/reports/FBgn0035193", "LINK")	This gene is referred to in FlyBase by the symbol Dmel\CG9192 (FBgn0035193). It is a protein_coding_gene from Dmel. It has one annotated transcript and one polypeptide. Gene sequence location is 3L:1237133..1238319. Its molecular function is unknown. The biological processes in which it is involved are not known. 3 alleles are reported. No phenotypic data is available. The phenotypic class of all…
FBgn0034293	6.87	7.06	5.95	3.64	3.85	4.26	0.763931	0.000473389	0.0473572	UP	CG14495	LINK	This gene is referred to in FlyBase by the symbol Dmel\CG14495 (FBgn0034293). It is a protein_coding_gene from Dmel. It has 2 annotated transcripts and 2 polypeptides (1 unique). Gene sequence location is 2R:18048804..18049922. Its molecular function is described by: . It is involved in the biological process described with: . 2 alleles are reported. No phenotypic data is available. The phenotypi…
FBgn0039453	10.17	5.42	4.07	3.82	4.14	3.13	0.835624	0.0117223	0.444408		CG6403	=HYPERLINK("http://flybase.org/reports/FBgn0039453", "LINK")	This gene is referred to in FlyBase by the symbol Dmel\CG6403 (FBgn0039453). It is a protein_coding_gene from Dmel. It has 2 annotated transcripts and 2 polypeptides (1 unique). Gene sequence location is 3R:26735417..26736307. Its molecular function is described by: chitin binding. It is involved in the biological process described with: chitin metabolic process. 2 alleles are reported. No phenot…
FBgn0015714	43.1	56.5	40.29	27.15	28.58	26.94	0.761252	1.4268e-06	0.000325353	UP	Cyp6a17	LINK	The gene Cytochrome P450-6a17 is referred to in FlyBase by the symbol Dmel\Cyp6a17 (CG10241, FBgn0015714). It is a protein_coding_gene from Dmel. It has 2 annotated transcripts and 2 polypeptides (1 unique). Gene sequence location is 2R:14873953..14875739. Its molecular function is described by: iron ion binding; heme binding; oxidoreductase activity, acting on paired donors, with incorporation o…
FBgn0040648	11.99	9.64	10.69	7.27	5.07	5.68	0.839772	0.000551976	0.0528031		CG11666	=HYPERLINK("http://flybase.org/reports/FBgn0040648", "LINK")	This gene is referred to in FlyBase by the symbol Dmel\CG11666 (FBgn0040648). It is a protein_coding_gene from Dmel. It has one annotated transcript and one polypeptide. Gene sequence location is X:20984686..20985246. Its molecular function is described by: . It is involved in the biological process described with: . 3 alleles are reported. No phenotypic data is available. The phenotypic class of…
FBgn0085320	94.35	105.95	81.58	61.67	61.18	46.68	0.735465	3.37959e-05	0.00494377	UP	CG34291	LINK	This gene is referred to in FlyBase by the symbol Dmel\CG34291 (FBgn0085320). It is a protein_coding_gene from Dmel. It has one annotated transcript and one polypeptide. Gene sequence location is 3R:26425290..26425781. Its molecular function is unknown. The biological processes in which it is involved are not known. One allele is reported. No phenotypic data is available. No phenotypic class data…
FBgn0053258	115.13	121.25	112.15	56.12	74.69	81.03	0.721415	4.53928e-06	0.000848025	UP	CG33258	LINK	This gene is referred to in FlyBase by the symbol Dmel\CG33258 (FBgn0053258). It is a protein_coding_gene from Dmel. It has 2 annotated transcripts and 2 polypeptides (1 unique). Gene sequence location is 3L:16082551..16083638. Its molecular function is described by: chitin binding. It is involved in the biological process described with: chitin metabolic process. 5 alleles are reported. No pheno…
FBgn0263381	4.56	4.13	4.43	3.63	1.17	2.43	0.842427	0.0260153	0.672877		asRNA:CR43433	=HYPERLINK("http://flybase.org/reports/FBgn0263381", "LINK")	The gene antisense RNA:CR43433 is referred to in FlyBase by the symbol Dmel\asRNA:CR43433 (CR43433, FBgn0263381). It is a non_protein_coding_gene from Dmel. It has one annotated transcript. Gene sequence location is 3L:17166863..17167542. Its molecular function is unknown. The biological processes in which it is involved are not known. No alleles are reported.
FBgn0031623	28.15	28.1	26.62	18.17	17.14	15.94	0.694557	2.02459e-05	0.00318104	UP	Taf12L	LINK	The gene TBP-associated factor 30kD subunit alpha-2 is referred to in FlyBase by the symbol Dmel\Taf12L (CG15632, FBgn0031623). It is a protein_coding_gene from Dmel. It has one annotated transcript and one polypeptide. Gene sequence location is 2L:4700835..4701485. Its molecular function is described by: protein heterodimerization activity. It is involved in the biological process described with…
FBgn0266258	1.49	1.64	2.12	1.05	0.81	1.03	0.852969	0.0241228	0.647922		lncRNA:CR44953	=HYPERLINK("http://flybase.org/reports/FBgn0266258", "LINK")	The gene long non-coding RNA:CR44953 is referred to in FlyBase by the symbol Dmel\lncRNA:CR44953 (CR44953, FBgn0266258). It is a non_protein_coding_gene from Dmel. It has one annotated transcript. Gene sequence location is 3R:29755190..29759040. Its molecular function is unknown. The biological processes in which it is involved are not known. One allele is reported. No phenotypic data is availabl…
FBgn0265862	1.77	2.7	1.89	1.74	0.8	0.93	0.855127	0.0281015	0.69734		lncRNA:CR44651	=HYPERLINK("http://flybase.org/reports/FBgn0265862", "LINK")	The gene long non-coding RNA:CR44651 is referred to in FlyBase by the symbol Dmel\lncRNA:CR44651 (CR44651, FBgn0265862). It is a non_protein_coding_gene from Dmel. It has one annotated transcript. Gene sequence location is 2R:20531867..20532969. Its molecular function is unknown. The biological processes in which it is involved are not known. No alleles are reported.
FBgn0026077	9.96	10.43	7.2	5.74	5.97	5.47	0.686233	0.000149152	0.0180683	UP	Gasp	LINK	The gene Gasp is referred to in FlyBase by the symbol Dmel\Gasp (CG10287, FBgn0026077). It is a protein_coding_gene from Dmel. It has 2 annotated transcripts and 2 polypeptides (all unique). Gene sequence location is 3R:6088799..6100887. Its molecular function is described by: chitin binding. It is involved in the biological process described with: chitin-based cuticle development; chitin metabol…
FBgn0039759	4.21	1.33	2.15	1.47	1.23	1.53	0.867526	0.0217759	0.61815		CG9733	=HYPERLINK("http://flybase.org/reports/FBgn0039759", "LINK")	This gene is referred to in FlyBase by the symbol Dmel\CG9733 (FBgn0039759). It is a protein_coding_gene from Dmel. It has 2 annotated transcripts and 2 polypeptides (all unique). Gene sequence location is 3R:30243978..30246703. Its molecular function is described by: serine-type endopeptidase activity. It is involved in the biological process described with: proteolysis. 8 alleles are reported. …
FBgn0266036	0.59	0.51	0.65	0.42	0.2	0.33	0.873352	0.0354363	0.765669		lncRNA:CR44801	=HYPERLINK("http://flybase.org/reports/FBgn0266036", "LINK")	The gene long non-coding RNA:CR44801 is referred to in FlyBase by the symbol Dmel\lncRNA:CR44801 (CR44801, FBgn0266036). It is a non_protein_coding_gene from Dmel. It has 2 annotated transcripts. Gene sequence location is 2L:987807..991300. Its molecular function is unknown. The biological processes in which it is involved are not known. One allele is reported. No phenotypic data is available. No…
FBgn0033353	3.18	5.01	2.63	1.4	2.07	2.46	0.874251	0.0119728	0.448431		CG13749	=HYPERLINK("http://flybase.org/reports/FBgn0033353", "LINK")	This gene is referred to in FlyBase by the symbol Dmel\CG13749 (FBgn0033353). It is a protein_coding_gene from Dmel. It has one annotated transcript and one polypeptide. Gene sequence location is 2R:8933423..8934445. Its molecular function is unknown. The biological processes in which it is involved are not known. 3 alleles are reported. No phenotypic data is available. The phenotypic classes of …
FBgn0053679	2.59	2.94	4.04	1.82	1.64	1.74	0.875223	0.0116044	0.443196		CG33679	=HYPERLINK("http://flybase.org/reports/FBgn0053679", "LINK")	This gene is referred to in FlyBase by the symbol Dmel\CG33679 (FBgn0053679). It is a protein_coding_gene from Dmel. It has one annotated transcript and one polypeptide. Gene sequence location is 2L:15058303..15059120. Its molecular function is described by: . It is involved in the biological process described with: . One allele is reported. No phenotypic data is available. No phenotypic class da…
FBgn0265413	36.34	31.79	25.86	19.38	20.57	19.03	0.67492	1.03007e-05	0.00177469	UP	CG44325	LINK	This gene is referred to in FlyBase by the symbol Dmel\CG44325 (FBgn0265413). It is a protein_coding_gene from Dmel. It has 5 annotated transcripts and 5 polypeptides (4 unique). Gene sequence location is X:9070318..9078499. Its molecular function is described by: . It is involved in the biological process described with: septate junction assembly. 9 alleles are reported. No phenotypic data is av…
FBgn0263406	1.33	2.29	2.45	1.14	0.92	1.2	0.885097	0.0292251	0.701923		lncRNA:CR43452	=HYPERLINK("http://flybase.org/reports/FBgn0263406", "LINK")	The gene long non-coding RNA:CR43452 is referred to in FlyBase by the symbol Dmel\lncRNA:CR43452 (CR43452, FBgn0263406). It is a non_protein_coding_gene from Dmel. It has one annotated transcript. Gene sequence location is 3R:20678183..20679079. Its molecular function is unknown. The biological processes in which it is involved are not known. No alleles are reported.
FBgn0037832	1.99	2.85	0.96	1.4	0.77	0.93	0.891125	0.0469278	0.851067		Desi	=HYPERLINK("http://flybase.org/reports/FBgn0037832", "LINK")	The gene Desiccate is referred to in FlyBase by the symbol Dmel\Desi (CG14686, FBgn0037832). It is a protein_coding_gene from Dmel. It has one annotated transcript and one polypeptide. Gene sequence location is 3R:10779569..10780825. Its molecular function is described by: SH2 domain binding; PDZ domain binding. It is involved in the biological process described with: response to desiccation; sen…
FBgn0262533	2.64	4.01	2.14	2.08	1.71	0.89	0.90409	0.0164687	0.527612		CR43087	=HYPERLINK("http://flybase.org/reports/FBgn0262533", "LINK")	This gene is referred to in FlyBase by the symbol Dmel\CR43087 (FBgn0262533). It is a pseudogene_attribute from Dmel. It has 2 annotated transcripts. Gene sequence location is 3L:17874715..17876573. Its molecular function is unknown. The biological processes in which it is involved are not known. One allele is reported. No phenotypic data is available. No phenotypic class data is available.
FBgn0038073	1.35	0.81	1.5	0.66	0.58	0.72	0.904343	0.00119426	0.0964489		CG14395	=HYPERLINK("http://flybase.org/reports/FBgn0038073", "LINK")	This gene is referred to in FlyBase by the symbol Dmel\CG14395 (FBgn0038073). It is a protein_coding_gene from Dmel. It has 8 annotated transcripts and 8 polypeptides (4 unique). Gene sequence location is 3R:12662831..12673959. Its molecular function is described by: . It is involved in the biological process described with: . 2 alleles are reported. No phenotypic data is available. The phenotypi…
FBgn0263380	3.05	4.79	2.87	1.6	1.8	2.33	0.905376	0.00448435	0.245122		lncRNA:CR43432	=HYPERLINK("http://flybase.org/reports/FBgn0263380", "LINK")	The gene long non-coding RNA:CR43432 is referred to in FlyBase by the symbol Dmel\lncRNA:CR43432 (CR43432, FBgn0263380). It is a non_protein_coding_gene from Dmel. It has 2 annotated transcripts. Gene sequence location is 3L:14976626..14977631. Its molecular function is unknown. The biological processes in which it is involved are not known. No alleles are reported.
FBgn0264958	6.2	6.18	2.91	3.7	2.81	1.61	0.912411	0.0420606	0.81524		lncRNA:CR44127	=HYPERLINK("http://flybase.org/reports/FBgn0264958", "LINK")	The gene long non-coding RNA:CR44127 is referred to in FlyBase by the symbol Dmel\lncRNA:CR44127 (CR44127, FBgn0264958). It is a non_protein_coding_gene from Dmel. It has 2 annotated transcripts. Gene sequence location is 2R:5967397..5967746. Its molecular function is unknown. The biological processes in which it is involved are not known. No alleles are reported.
FBgn0046875	2.92	3.71	2.45	1.79	1.64	1.32	0.932073	0.0203591	0.592896		Obp83g	=HYPERLINK("http://flybase.org/reports/FBgn0046875", "LINK")	The gene Odorant-binding protein 83g is referred to in FlyBase by the symbol Dmel\Obp83g (CG31558, FBgn0046875). It is a protein_coding_gene from Dmel. It has one annotated transcript and one polypeptide. Gene sequence location is 3R:6111671..6112302. Its molecular function is described by: odorant binding. It is involved in the biological process described with: sensory perception of smell; sens…
FBgn0262838	7.53	15.12	10.43	6.33	4.9	5.89	0.942097	0.00253474	0.166541		CG43202	=HYPERLINK("http://flybase.org/reports/FBgn0262838", "LINK")	The gene Bomanin Tailed 1 is referred to in FlyBase by the symbol Dmel\BomT1 (CG43202, FBgn0262838). It is a protein_coding_gene from Dmel. It has one annotated transcript and one polypeptide. Gene sequence location is 2R:18381393..18381844. Its molecular function is unknown. The biological processes in which it is involved are not known. One allele is reported. No phenotypic data is available. N…
FBgn0043783	610.39	798.8	874.56	396.45	525.1	522.93	0.663616	9.59095e-05	0.0127107	UP	CG32444	LINK	This gene is referred to in FlyBase by the symbol Dmel\CG32444 (FBgn0043783). It is a protein_coding_gene from Dmel. It has one annotated transcript and one polypeptide. Gene sequence location is 3L:21636947..21639060. Its molecular function is described by: carbohydrate binding; aldose 1-epimerase activity. It is involved in the biological process described with: glucose metabolic process; galac…
FBgn0036589	27.69	24.07	21.92	15.15	17.05	15.45	0.634556	0.00037607	0.039401	UP	CG13067	LINK	This gene is referred to in FlyBase by the symbol Dmel\CG13067 (FBgn0036589). It is a protein_coding_gene from Dmel. It has one annotated transcript and one polypeptide. Gene sequence location is 3L:16271282..16271918. Its molecular function is unknown. The biological processes in which it is involved are not known. 2 alleles are reported. No phenotypic data is available. The phenotypic class of …
FBgn0053668	12.71	8.43	7.04	4.84	7.05	2.81	0.94884	0.00387633	0.227676		CG33668	=HYPERLINK("http://flybase.org/reports/FBgn0053668", "LINK")	This gene is referred to in FlyBase by the symbol Dmel\CG33668 (FBgn0053668). It is a protein_coding_gene from Dmel. It has one annotated transcript and one polypeptide. Gene sequence location is X:6418760..6419434. Its molecular function is described by: . It is involved in the biological process described with: . No alleles are reported. Summary of modENCODE Temporal Expression Profile: Tempora…
FBgn0020509	336.53	315.28	207.83	188.4	177.51	190.87	0.628954	0.000394659	0.0407973	UP	Acp62F	LINK	The gene Accessory gland protein 62F is referred to in FlyBase by the symbol Dmel\Acp62F (CG1262, FBgn0020509). It is a protein_coding_gene from Dmel. It has one annotated transcript and one polypeptide. Gene sequence location is 3L:2739750..2740228. Its molecular function is described by: serine-type endopeptidase inhibitor activity. It is involved in the biological process described with: sperm…
FBgn0031088	0	0	0.02	0.59	0.36	0.6	-6.50631	2.5749e-07	6.88386e-05	DOWN	CG15322	LINK	This gene is referred to in FlyBase by the symbol Dmel\CG15322 (FBgn0031088). It is a protein_coding_gene from Dmel. It has 2 annotated transcripts and 2 polypeptides (1 unique). Gene sequence location is X:20133579..20138878. Its molecular function is unknown. The biological processes in which it is involved are not known. 4 alleles are reported. No phenotypic data is available. The phenotypic c…
FBgn0030001	0.58	0.3	0.63	0.18	0.3	0.31	0.94963	0.041153	0.80965		cyr	=HYPERLINK("http://flybase.org/reports/FBgn0030001", "LINK")	The gene cypher is referred to in FlyBase by the symbol Dmel\cyr (CG15335, FBgn0030001). It is a protein_coding_gene from Dmel. It has 3 annotated transcripts and 3 polypeptides (2 unique). Gene sequence location is X:8121280..8135713. Its molecular function is described by: . It is involved in the biological process described with: epithelial cell morphogenesis. 12 alleles are reported. No pheno…
FBgn0037975	0.07	0	0	2.58	1.44	2.88	-6.38682	5.92007e-09	2.18563e-06	DOWN	CG3397	LINK	This gene is referred to in FlyBase by the symbol Dmel\CG3397 (FBgn0037975). It is a protein_coding_gene from Dmel. It has one annotated transcript and one polypeptide. Gene sequence location is 3R:11983098..11984541. Its molecular function is described by: oxidoreductase activity. It is involved in the biological process described with: oxidation-reduction process. 5 alleles are reported. No phe…
FBgn0030928	3.31	3.03	2.02	2.58	1.01	0.68	0.955445	0.0360112	0.773393		CG15044	=HYPERLINK("http://flybase.org/reports/FBgn0030928", "LINK")	This gene is referred to in FlyBase by the symbol Dmel\CG15044 (FBgn0030928). It is a protein_coding_gene from Dmel. It has one annotated transcript and one polypeptide. Gene sequence location is X:18491185..18492006. Its molecular function is unknown. The biological processes in which it is involved are not known. 4 alleles are reported. No phenotypic data is available. The phenotypic class of a…
FBgn0264568	4.73	1.63	2.85	2.36	1.26	1.08	0.966914	0.0253119	0.661866		lncRNA:CR43940	=HYPERLINK("http://flybase.org/reports/FBgn0264568", "LINK")	The gene long non-coding RNA:CR43940 is referred to in FlyBase by the symbol Dmel\lncRNA:CR43940 (CR43940, FBgn0264568). It is a non_protein_coding_gene from Dmel. It has one annotated transcript. Gene sequence location is 3L:21594597..21595460. Its molecular function is unknown. The biological processes in which it is involved are not known. No alleles are reported.
FBgn0026144	0.61	0.65	0.56	0.32	0.3	0.31	0.9719	0.0170404	0.537049		CBP	=HYPERLINK("http://flybase.org/reports/FBgn0026144", "LINK")	The gene sarcoplasmic calcium-binding protein is referred to in FlyBase by the symbol Dmel\CBP (CG1435, FBgn0026144). It is a protein_coding_gene from Dmel. It has 3 annotated transcripts and 3 polypeptides (all unique). Gene sequence location is X:7337352..7342731. Its molecular function is described by: calcium ion binding. It is involved in the biological process described with: defense respon…
FBgn0029924	1.94	1.3	1.22	0.54	0.67	1.07	0.982254	0.00434517	0.241492		CG4586	=HYPERLINK("http://flybase.org/reports/FBgn0029924", "LINK")	This gene is referred to in FlyBase by the symbol Dmel\CG4586 (FBgn0029924). It is a protein_coding_gene from Dmel. It has one annotated transcript and one polypeptide. Gene sequence location is X:6969918..6972265. Its molecular function is described by: FAD binding; acyl-CoA oxidase activity; flavin adenine dinucleotide binding; fatty acid binding. It is involved in the biological process descri…
FBgn0266380	0	0	0	1.61	1.93	1.4	-5.58629	0.000102192	0.0132049	DOWN	lncRNA:CR45022	LINK	The gene long non-coding RNA:CR45022 is referred to in FlyBase by the symbol Dmel\lncRNA:CR45022 (CR45022, FBgn0266380). It is a non_protein_coding_gene from Dmel. It has one annotated transcript. Gene sequence location is 2R:18074172..18074489. Its molecular function is unknown. The biological processes in which it is involved are not known. No alleles are reported.
FBgn0052284	10.99	4.62	2.11	2.66	3.51	2.87	0.985836	0.0384344	0.78719		CG32284	=HYPERLINK("http://flybase.org/reports/FBgn0052284", "LINK")	This gene is referred to in FlyBase by the symbol Dmel\CG32284 (FBgn0052284). It is a protein_coding_gene from Dmel. It has one annotated transcript and one polypeptide. Gene sequence location is 3L:3186664..3187245. Its molecular function is described by: chitin binding. It is involved in the biological process described with: chitin metabolic process. 3 alleles are reported. No phenotypic data …
FBgn0053665	0.13	0	0	3.3	2.69	1	-5.55679	1.73494e-06	0.000373639	DOWN	CG33665	LINK	This gene is referred to in FlyBase by the symbol Dmel\CG33665 (FBgn0053665). It is a protein_coding_gene from Dmel. It has one annotated transcript and one polypeptide. Gene sequence location is X:6478138..6478849. Its molecular function is described by: . It is involved in the biological process described with: . 2 alleles are reported. No phenotypic data is available. No phenotypic class data …
FBgn0266689	0.04	0	0.05	1.55	1.33	1.12	-5.46393	1.05381e-06	0.000247582	DOWN	lncRNA:CR45179	LINK	The gene long non-coding RNA:CR45179 is referred to in FlyBase by the symbol Dmel\lncRNA:CR45179 (CR45179, FBgn0266689). It is a non_protein_coding_gene from Dmel. It has 2 annotated transcripts. Gene sequence location is 3L:16689268..16697897. Its molecular function is unknown. The biological processes in which it is involved are not known. No alleles are reported.
FBgn0004778	0.07	0	0.28	3.31	3.21	1.78	-4.59775	8.83726e-08	2.79654e-05	DOWN	Ccp84Af	LINK	The gene Ccp84Af is referred to in FlyBase by the symbol Dmel\Ccp84Af (CG1331, FBgn0004778). It is a protein_coding_gene from Dmel. It has one annotated transcript and one polypeptide. Gene sequence location is 3R:6689602..6690239. Its molecular function is described by: structural constituent of chitin-based larval cuticle; structural constituent of cuticle. It is involved in the biological proc…
FBgn0264825	1.81	0.98	1.2	0.79	0.72	0.5	0.997343	0.0384812	0.78719		lncRNA:CR44033	=HYPERLINK("http://flybase.org/reports/FBgn0264825", "LINK")	The gene long non-coding RNA:CR44033 is referred to in FlyBase by the symbol Dmel\lncRNA:CR44033 (CR44033, FBgn0264825). It is a non_protein_coding_gene from Dmel. It has one annotated transcript. Gene sequence location is 3R:21534429..21535367. Its molecular function is unknown. The biological processes in which it is involved are not known. No alleles are reported.
FBgn0033207	5.46	1.89	1.79	1.53	1.23	1.83	1.00601	0.0299235	0.707307		CG12826	=HYPERLINK("http://flybase.org/reports/FBgn0033207", "LINK")	This gene is referred to in FlyBase by the symbol Dmel\CG12826 (FBgn0033207). It is a protein_coding_gene from Dmel. It has one annotated transcript and one polypeptide. Gene sequence location is 2R:7670327..7671103. Its molecular function is described by: . It is involved in the biological process described with: . 2 alleles are reported. No phenotypic data is available. No phenotypic class data…
FBgn0265161	1.92	1.05	1.59	0.52	0.79	0.96	1.02249	0.0241439	0.647922		lncRNA:CR44230	=HYPERLINK("http://flybase.org/reports/FBgn0265161", "LINK")	The gene long non-coding RNA:CR44230 is referred to in FlyBase by the symbol Dmel\lncRNA:CR44230 (CR44230, FBgn0265161). It is a non_protein_coding_gene from Dmel. It has one annotated transcript. Gene sequence location is 3R:10682632..10684424. Its molecular function is unknown. The biological processes in which it is involved are not known. No alleles are reported.
FBgn0031034	0.58	0.81	1.05	0.42	0.29	0.48	1.03028	0.0118181	0.444408		CG14205	=HYPERLINK("http://flybase.org/reports/FBgn0031034", "LINK")	This gene is referred to in FlyBase by the symbol Dmel\CG14205 (FBgn0031034). It is a protein_coding_gene from Dmel. It has one annotated transcript and one polypeptide. Gene sequence location is X:19592609..19595548. Its molecular function is described by: transferase activity, transferring acyl groups other than amino-acyl groups. The biological processes in which it is involved are not known. …
FBgn0039685	398.11	327.82	379.78	91.8	199.19	250.08	1.03348	0.013056	0.463163		Obp99b	=HYPERLINK("http://flybase.org/reports/FBgn0039685", "LINK")	The gene Odorant-binding protein 99b is referred to in FlyBase by the symbol Dmel\Obp99b (CG7592, FBgn0039685). It is a protein_coding_gene from Dmel. It has 2 annotated transcripts and 2 polypeptides (1 unique). Gene sequence location is 3R:29716254..29716896. Its molecular function is described by: odorant binding. It is involved in the biological process described with: olfactory behavior; res…
FBgn0285912	1.99	1.5	1.55	0.59	1.01	0.89	1.0364	0.00271276	0.176001		mah	=HYPERLINK("http://flybase.org/reports/FBgn0285912", "LINK")	The gene mahogany is referred to in FlyBase by the symbol Dmel\mah (CG13646, FBgn0285912). It is a protein_coding_gene from Dmel. It has one annotated transcript and one polypeptide. Gene sequence location is 3R:24947632..24949539. Its molecular function is described by: amino acid transmembrane transporter activity. It is involved in the biological process described with: amino acid transmembran…
FBgn0040965	0.87	1.95	1.35	0.71	0.87	0.45	1.03713	0.0457655	0.841804		lncRNA:CR13130	=HYPERLINK("http://flybase.org/reports/FBgn0040965", "LINK")	The gene long non-coding RNA:CR13130 is referred to in FlyBase by the symbol Dmel\lncRNA:CR13130 (CR13130, FBgn0040965). It is a non_protein_coding_gene from Dmel. It has one annotated transcript. Gene sequence location is 2L:9983671..9984743. Its molecular function is unknown. The biological processes in which it is involved are not known. 19 alleles are reported. The phenotypes of these alleles…
FBgn0010043	2.59	2.65	3.4	1.09	1.44	1.67	1.04789	0.00453772	0.246884		GstD7	=HYPERLINK("http://flybase.org/reports/FBgn0010043", "LINK")	The gene Glutathione S transferase D7 is referred to in FlyBase by the symbol Dmel\GstD7 (CG4371, FBgn0010043). It is a protein_coding_gene from Dmel. It has one annotated transcript and one polypeptide. Gene sequence location is 3R:12378500..12379255. Its molecular function is described by: glutathione transferase activity. It is involved in the biological process described with: glutathione met…
FBgn0267046	0.07	0.09	0.09	2.68	0.09	2.58	-4.43422	0.000100016	0.0130324	DOWN	CG45490	LINK	This gene is referred to in FlyBase by the symbol Dmel\CG45490 (FBgn0267046). It is a protein_coding_gene from Dmel. It has one annotated transcript and one polypeptide. Gene sequence location is X:19933541..19934294. Its molecular function is described by: . It is involved in the biological process described with: . No alleles are reported.
FBgn0263502	4.33	7.74	6.81	3.3	2.47	3.28	1.05203	0.000792868	0.0690686		lncRNA:CR43491	=HYPERLINK("http://flybase.org/reports/FBgn0263502", "LINK")	The gene long non-coding RNA:CR43491 is referred to in FlyBase by the symbol Dmel\lncRNA:CR43491 (CR43491, FBgn0263502). It is a non_protein_coding_gene from Dmel. It has one annotated transcript. Gene sequence location is X:17378376..17379004. Its molecular function is unknown. The biological processes in which it is involved are not known. No alleles are reported.
FBgn0266246	0.18	0	0.15	1.19	1.42	1.49	-3.53418	2.97508e-05	0.00443573	DOWN	lncRNA:CR44941	LINK	The gene long non-coding RNA:CR44941 is referred to in FlyBase by the symbol Dmel\lncRNA:CR44941 (CR44941, FBgn0266246). It is a non_protein_coding_gene from Dmel. It has one annotated transcript. Gene sequence location is 3R:12335924..12339275. Its molecular function is unknown. The biological processes in which it is involved are not known. No alleles are reported.
FBgn0051041	2.37	1.7	0.92	0.62	0.89	0.94	1.0542	0.0424356	0.817399		CG31041	=HYPERLINK("http://flybase.org/reports/FBgn0051041", "LINK")	This gene is referred to in FlyBase by the symbol Dmel\CG31041 (FBgn0051041). It is a protein_coding_gene from Dmel. It has one annotated transcript and one polypeptide. Gene sequence location is 3R:29590070..29590906. Its molecular function is described by: . It is involved in the biological process described with: . 3 alleles are reported. No phenotypic data is available. The phenotypic class o…
FBgn0263341	0	0.24	0.39	1.73	1.37	1.31	-2.87645	0.000123633	0.0153365	DOWN	lncRNA:CR43422	LINK	The gene long non-coding RNA:CR43422 is referred to in FlyBase by the symbol Dmel\lncRNA:CR43422 (CR43422, FBgn0263341). It is a non_protein_coding_gene from Dmel. It has one annotated transcript. Gene sequence location is 2R:22291717..22292395. Its molecular function is unknown. The biological processes in which it is involved are not known. No alleles are reported.
FBgn0263504	0.49	0.98	0.54	0.3	0.4	0.27	1.06037	0.0252844	0.661866		lncRNA:CR43493	=HYPERLINK("http://flybase.org/reports/FBgn0263504", "LINK")	The gene long non-coding RNA:CR43493 is referred to in FlyBase by the symbol Dmel\lncRNA:CR43493 (CR43493, FBgn0263504). It is a non_protein_coding_gene from Dmel. It has one annotated transcript. Gene sequence location is X:22487854..22490872. Its molecular function is unknown. The biological processes in which it is involved are not known. No alleles are reported.
FBgn0266772	6.03	4.06	4.64	3.29	2.39	1.35	1.0625	0.0151547	0.504267		lncRNA:CR45237	=HYPERLINK("http://flybase.org/reports/FBgn0266772", "LINK")	The gene long non-coding RNA:CR45237 is referred to in FlyBase by the symbol Dmel\lncRNA:CR45237 (CR45237, FBgn0266772). It is a non_protein_coding_gene from Dmel. It has one annotated transcript. Gene sequence location is 3L:22420855..22421200. Its molecular function is unknown. The biological processes in which it is involved are not known. No alleles are reported.
FBgn0034473	0.88	0.77	1.19	0.75	0.25	0.33	1.06865	0.0424883	0.817399		Or56a	=HYPERLINK("http://flybase.org/reports/FBgn0034473", "LINK")	The gene Odorant receptor 56a is referred to in FlyBase by the symbol Dmel\Or56a (CG12501, FBgn0034473). It is a protein_coding_gene from Dmel. It has one annotated transcript and one polypeptide. Gene sequence location is 2R:19769461..19771233. Its molecular function is described by: odorant binding; olfactory receptor activity. It is involved in the biological process described with: detection …
FBgn0004781	0.2	0.26	0.25	1.07	1.02	1.33	-2.28111	8.17648e-05	0.0109297	DOWN	Ccp84Ac	LINK	The gene Ccp84Ac is referred to in FlyBase by the symbol Dmel\Ccp84Ac (CG1327, FBgn0004781). It is a protein_coding_gene from Dmel. It has one annotated transcript and one polypeptide. Gene sequence location is 3R:6695148..6696271. Its molecular function is described by: structural constituent of chitin-based larval cuticle; structural constituent of cuticle. It is involved in the biological proc…
FBgn0050272	1.68	1.5	2.05	1.29	0.67	0.5	1.07157	0.00433086	0.241492		MFS1	=HYPERLINK("http://flybase.org/reports/FBgn0050272", "LINK")	The gene Major Facilitator Superfamily Transporter 1 is referred to in FlyBase by the symbol Dmel\MFS1 (CG30272, FBgn0050272). It is a protein_coding_gene from Dmel. It has one annotated transcript and one polypeptide. Gene sequence location is 2R:22829644..22831877. Its molecular function is described by: transmembrane transporter activity. It is involved in the biological process described with…
FBgn0000473	23.49	30.34	25.42	112.26	117.68	98.79	-2.05074	3.09999e-44	1.60228e-40	DOWN	Cyp6a2	LINK	The gene Cytochrome P450-6a2 is referred to in FlyBase by the symbol Dmel\Cyp6a2 (CG9438, FBgn0000473). It is a protein_coding_gene from Dmel. It has one annotated transcript and one polypeptide. Gene sequence location is 2R:6779749..6781491. Its molecular function is described by: iron ion binding; heme binding; oxidoreductase activity, acting on paired donors, with incorporation or reduction of…
FBgn0052302	3.12	2.96	1.34	0.84	1.77	0.96	1.07652	0.0091252	0.377321		CG32302	=HYPERLINK("http://flybase.org/reports/FBgn0052302", "LINK")	This gene is referred to in FlyBase by the symbol Dmel\CG32302 (FBgn0052302). It is a protein_coding_gene from Dmel. It has one annotated transcript and one polypeptide. Gene sequence location is 3L:2268825..2269903. Its molecular function is described by: chitin binding. It is involved in the biological process described with: chitin metabolic process. 6 alleles are reported. No phenotypic data …
FBgn0004431	3.92	3.07	4.46	0.97	2.2	2.33	1.07843	0.00772889	0.341436		LysX	=HYPERLINK("http://flybase.org/reports/FBgn0004431", "LINK")	The gene Lysozyme X is referred to in FlyBase by the symbol Dmel\LysX (CG9120, FBgn0004431). It is a protein_coding_gene from Dmel. It has one annotated transcript and one polypeptide. Gene sequence location is 3L:1194739..1195302. Its molecular function is described by: lysozyme activity. It is involved in the biological process described with: defense response to Gram-negative bacterium. 4 alle…
FBgn0031412	2.24	2.1	2.75	0.6	1.58	1.23	1.07891	0.0139003	0.478702		CG16995	=HYPERLINK("http://flybase.org/reports/FBgn0031412", "LINK")	This gene is referred to in FlyBase by the symbol Dmel\CG16995 (FBgn0031412). It is a protein_coding_gene from Dmel. It has one annotated transcript and one polypeptide. Gene sequence location is 2L:2307948..2308872. Its molecular function is described by: . It is involved in the biological process described with: multicellular organism reproduction. 3 alleles are reported. No phenotypic data is …
FBgn0284250	0.13	0.06	0.11	0.48	0.32	0.4	-1.99397	6.08379e-06	0.00109692	DOWN	Oaz	LINK	The gene O/E-associated zinc finger protein is referred to in FlyBase by the symbol Dmel\Oaz (CG42702, FBgn0284250). It is a protein_coding_gene from Dmel. It has 2 annotated transcripts and 2 polypeptides (all unique). Gene sequence location is 2R:14435899..14465881. Its molecular function is described by: nucleic acid binding. It is involved in the biological process described with: negative re…
FBgn0029879	1.51	1.05	1.13	0.36	0.63	0.77	1.09599	0.00235034	0.158454		APC7	=HYPERLINK("http://flybase.org/reports/FBgn0029879", "LINK")	The gene Anaphase Promoting Complex subunit 7 is referred to in FlyBase by the symbol Dmel\APC7 (CG14444, FBgn0029879). It is a protein_coding_gene from Dmel. It has 2 annotated transcripts and 2 polypeptides (all unique). Gene sequence location is X:6597088..6599699. Its molecular function is unknown. It is involved in the biological process described with: cell division; positive regulation of …
FBgn0264790	1.82	2.31	2.35	1.29	0.82	0.86	1.10925	0.00673457	0.319346		asRNA:CR44020	=HYPERLINK("http://flybase.org/reports/FBgn0264790", "LINK")	The gene antisense RNA:CR44020 is referred to in FlyBase by the symbol Dmel\asRNA:CR44020 (CR44020, FBgn0264790). It is a non_protein_coding_gene from Dmel. It has one annotated transcript. Gene sequence location is 3R:8934279..8935287. Its molecular function is unknown. The biological processes in which it is involved are not known. No alleles are reported.
FBgn0036880	1.46	2.21	2.24	0.6	1.18	0.94	1.12929	0.000753255	0.0667129		Cpr76Bc	=HYPERLINK("http://flybase.org/reports/FBgn0036880", "LINK")	The gene Cuticular protein 76Bc is referred to in FlyBase by the symbol Dmel\Cpr76Bc (CG9295, FBgn0036880). It is a protein_coding_gene from Dmel. It has 2 annotated transcripts and 2 polypeptides (1 unique). Gene sequence location is 3L:19520945..19527272. Its molecular function is described by: structural constituent of cuticle; structural constituent of chitin-based larval cuticle. It is invol…
FBgn0267473	1.07	1.55	1.6	1.04	0.47	0.38	1.13438	0.0289929	0.701923		lncRNA:CR45823	=HYPERLINK("http://flybase.org/reports/FBgn0267473", "LINK")	The gene long non-coding RNA:CR45823 is referred to in FlyBase by the symbol Dmel\lncRNA:CR45823 (CR45823, FBgn0267473). It is a non_protein_coding_gene from Dmel. It has one annotated transcript. Gene sequence location is 3L:8844944..8845814. Its molecular function is unknown. The biological processes in which it is involved are not known. No alleles are reported.
FBgn0037546	0.66	0.57	0.91	2.61	2.73	2.86	-1.93543	2.96612e-19	4.59927e-16	DOWN	mAChR-B	LINK	The gene muscarinic Acetylcholine Receptor, B-type is referred to in FlyBase by the symbol Dmel\mAChR-B (CG7918, FBgn0037546). It is a protein_coding_gene from Dmel. It has 2 annotated transcripts and 2 polypeptides (all unique). Gene sequence location is 3R:8059284..8087049. Its molecular function is described by: G protein-coupled serotonin receptor activity; G protein-coupled amine receptor ac…
FBgn0267752	5.38	5.87	4.29	1.95	1.56	3.5	1.1484	0.00149613	0.114851		lncRNA:CR46083	=HYPERLINK("http://flybase.org/reports/FBgn0267752", "LINK")	The gene long non-coding RNA:CR46083 is referred to in FlyBase by the symbol Dmel\lncRNA:CR46083 (CR46083, FBgn0267752). It is a non_protein_coding_gene from Dmel. It has one annotated transcript. Gene sequence location is 3R:26509539..26510100. Its molecular function is unknown. The biological processes in which it is involved are not known. No alleles are reported.
FBgn0264704	1.56	1.25	1.55	0.61	0.8	0.54	1.17688	0.0485484	0.862014		lncRNA:CR43973	=HYPERLINK("http://flybase.org/reports/FBgn0264704", "LINK")	The gene long non-coding RNA:CR43973 is referred to in FlyBase by the symbol Dmel\lncRNA:CR43973 (CR43973, FBgn0264704). It is a non_protein_coding_gene from Dmel. It has one annotated transcript. Gene sequence location is 3L:15098534..15099502. Its molecular function is unknown. The biological processes in which it is involved are not known. No alleles are reported.
FBgn0263389	5.08	3.61	5.26	2.48	1.54	2.06	1.19139	0.000757221	0.0667129		CG43441	=HYPERLINK("http://flybase.org/reports/FBgn0263389", "LINK")	This gene is referred to in FlyBase by the symbol Dmel\CR43441 (FBgn0263389). It is a pseudogene_attribute from Dmel. It has one annotated transcript. Gene sequence location is 3R:9652659..9653228. Its molecular function is unknown. The biological processes in which it is involved are not known. No alleles are reported.
FBgn0262794	11.76	3.8	2.97	3.55	2.57	1.99	1.19582	0.00720687	0.328763		CG43175	=HYPERLINK("http://flybase.org/reports/FBgn0262794", "LINK")	This gene is referred to in FlyBase by the symbol Dmel\CG43175 (FBgn0262794). It is a protein_coding_gene from Dmel. It has 2 annotated transcripts and 2 polypeptides (all unique). Gene sequence location is 3R:17630717..17645262. Its molecular function is described by: . It is involved in the biological process described with: response to wounding. One allele is reported. No phenotypic data is av…
FBgn0034183	1.12	1.3	1.11	0.39	0.55	0.6	1.20001	0.00149619	0.114851		SmydA-6	=HYPERLINK("http://flybase.org/reports/FBgn0034183", "LINK")	The gene SET and MYND domain containing, arthropod-specific, member 6 is referred to in FlyBase by the symbol Dmel\SmydA-6 (CG9642, FBgn0034183). It is a protein_coding_gene from Dmel. It has one annotated transcript and one polypeptide. Gene sequence location is 2R:17046839..17048794. Its molecular function is described by: histone deacetylase binding. It is involved in the biological process de…
FBgn0037974	5.36	7.11	6.02	20.44	24.07	26.11	-1.9335	6.26333e-29	1.61865e-25	DOWN	CG12224	LINK	This gene is referred to in FlyBase by the symbol Dmel\CG12224 (FBgn0037974). It is a protein_coding_gene from Dmel. It has one annotated transcript and one polypeptide. Gene sequence location is 3R:11980704..11982062. Its molecular function is described by: oxidoreductase activity. The biological processes in which it is involved are not known. 7 alleles are reported. No phenotypic data is avail…
FBgn0031141	13.01	17.26	8.21	43.9	47.58	54.84	-1.92386	8.4839e-18	1.01193e-14	DOWN	CG1304	LINK	This gene is referred to in FlyBase by the symbol Dmel\CG1304 (FBgn0031141). It is a protein_coding_gene from Dmel. It has one annotated transcript and one polypeptide. Gene sequence location is X:20964527..20965419. Its molecular function is described by: serine-type endopeptidase activity. It is involved in the biological process described with: proteolysis. 3 alleles are reported. No phenotypi…
novel.125	1.18	1.3	1.88	0.58	0.76	0.52	1.23012	0.0400031	0.796156		-	=HYPERLINK("http://flybase.org/reports/novel.125", "LINK")
FBgn0265963	5.1	2.62	3.36	1.34	1.47	1.94	1.2342	0.00107671	0.0883355		lncRNA:CR44750	=HYPERLINK("http://flybase.org/reports/FBgn0265963", "LINK")	The gene long non-coding RNA:CR44750 is referred to in FlyBase by the symbol Dmel\lncRNA:CR44750 (CR44750, FBgn0265963). It is a non_protein_coding_gene from Dmel. It has 2 annotated transcripts. Gene sequence location is 2R:21727495..21728195. Its molecular function is unknown. The biological processes in which it is involved are not known. No alleles are reported.
[truncated: 17,210 more rows]

## Sheet: P384RvsWT
gene_id	P384R_1	P384R_2	P384R_3	WT_1	WT_2	WT_3	log2FoldChange	pvalue	padj	DIFFEXP	gene_name	FLYBASE	desc
[truncated: 17,972 more rows]

## Sheet: DecWTvsWT
gene_id	WT_1	WT_2	WT_3	DecWT_1	DecWT_2	DecWT_3	log2FoldChange	pvalue	padj	DIFFEXP	gene_name	FLYBASE	desc
[truncated: 17,972 more rows]
