# Supplementary material for: A familial natural short sleep mutation promotes healthy aging and extends lifespan in Drosophila
Source: Research Square preprint supplement (doi:10.21203/rs.3.rs-2882949/v1), 2023-06-02
Supplement: Supplementary file 2 [file 92bca4306acd2240a4729f15.xlsx]

## Sheet: Table S1
mtnA
Forward primer: CGGAAGCGGATGCAAATG
Reverse primer: CCGCAGGCGGATTTCTT
mtnB
Forward primer: GAACAAACTGCCAGTGCTC
Reverse primer: GGCCCATTCTTGCAAACG
mtnC
Forward primer: CAAAGGCTGCGGAACAAAC
Reverse primer: TGCTCTTGCAACACTGATCT
mtnD
Forward primer: ACCAAGTGCGGTGACAA
Reverse primer: GGAGCAGCACTTGTCCTT
mtnE
Forward primer: CAAGGGATGTGGAAACAACTG
Reverse primer: GCATTGGCATTGGCTGTTTC
CG11699
Forward primer: CCTTCTGCTACGGCTTCTG
Reverse primer: GGTTCGTCCTTGGTGATTCT
mthl8
Forward primer: TACGTGCAGTACGGACTTTC
Reverse primer: TGGACTAGATTTGGAGCAGTTT
lsp1alpha
Forward primer: TCTTCCCGCAGTTCTTCTTC
Reverse primer: GGCTAGTCTTCATCCACATCTC
nmdmc
Forward GAGCGTAATTGTGTCGAGGAA
Reverse GGCAGATCCAGCGAGTTATTAG
CG11458
Forward primer: ATGCGCTTCGCTCTACTT
Reverse: TCCTCCTCCTCCATTCTTCT
CG10725
Forward primer: GTGGGCAACTGTAGCAAGTA
Reverse primer: CAATACACTCGACCTCCATCAG
twdID
Forward primer: GCCGATAAACTGGGCTACAA
Reverse primer: CTCCAATCACCTGACCACTTC
astCC
Forward primer: TCCGTTGTGCAGAACCTATC
Reverse primer: GCCCGGATACACCATCAAT
