# Supplementary material for: A familial natural short sleep mutation promotes healthy aging and extends lifespan in Drosophila
Source: Research Square preprint supplement (doi:10.21203/rs.3.rs-2882949/v1), 2023-06-02
Supplement: Supplementary file 3 [file 9ba16f2bbef3f3290adc4418.xlsx]

## Sheet: P384RvsDecWT
gene_id	P384R-1	P384R-2	P384R-3	DecWT-1	DecWT-2	DecWT-3	log2FoldChange	pvalue	padj	DIFFEXP	gene_symbol	URL	desc
FBgn0036856	0	0	31.115	0	0	0	6.52875	0.0953624	0.999974		Mettl5	LINK	The gene Methyltransferase like 5 is referred to in FlyBase by the symbol Dmel\Mettl5 (CG9666, FBgn0036856). It is a protein_coding_gene from Dmel. It has 2 annotated transcripts and 2 polypeptides (1 unique). Gene sequence location is 3L:19263766..19266838. Its molecular function is described by: protein binding; nucleic acid binding; rRNA (adenine-N6-)-methyltransferase activity. It is involved…
FBgn0286939	16.999	0	0	0	0	0	5.76357	0.1415	0.999974		CG46433	LINK	This gene is referred to in FlyBase by the symbol Dmel\CG46433 (FBgn0286939). It is a protein_coding_gene from Dmel. It has 3 annotated transcripts and 3 polypeptides (1 unique). Gene sequence location is 2R:15698726..15701696. Its molecular function is unknown. The biological processes in which it is involved are not known. No alleles are reported.
FBgn0283434	54.303	62.741	73.101	0	8.998	0	4.98922	0.00376962	0.497743		SdicC	LINK	The gene Sperm-specific dynein intermediate chain C is referred to in FlyBase by the symbol Dmel\SdicC (CG46277, FBgn0283434). It is a protein_coding_gene from Dmel. It has one annotated transcript and one polypeptide. Gene sequence location is X:20212738..20217259. Its molecular function is described by: dynein light chain binding; dynein heavy chain binding. It is involved in the biological pro…
FBgn0054026	132.025	408.293	74	0	7	16.565	4.98553	0.000165476	0.0574476		CG34026	LINK	This gene is referred to in FlyBase by the symbol Dmel\CG34026 (FBgn0054026). It is a protein_coding_gene from Dmel. It has 2 annotated transcripts and 2 polypeptides (1 unique). Gene sequence location is X:9533818..9534625. Its molecular function is described by: . It is involved in the biological process described with: . No alleles are reported. Summary of modENCODE Temporal Expression Profile…
FBgn0266647	34.937	37.334	36.756	0	1.046	4.332	4.98535	7.12951e-11	1.78209e-07	UP	CG45154	LINK	This gene is referred to in FlyBase by the symbol Dmel\CG45154 (FBgn0266647). It is a protein_coding_gene from Dmel. It has one annotated transcript and one polypeptide. Gene sequence location is X:21146281..21147041. Its molecular function is described by: . It is involved in the biological process described with: . No alleles are reported.
FBgn0052706	5.574	21.963	15.236	0	2.009	0	4.79258	6.6131e-05	0.0306113	UP	CG32706	LINK	This gene is referred to in FlyBase by the symbol Dmel\CG32706 (FBgn0052706). It is a protein_coding_gene from Dmel. It has one annotated transcript and one polypeptide. Gene sequence location is X:9087129..9088073. Its molecular function is described by: RNA binding. It is involved in the biological process described with: small-subunit processome assembly; endonucleolytic cleavage to generate m…
FBgn0266176	3.935	8.827	0	0	0	0	4.65333	0.16069	0.999974		pre-mod(mdg4)-J	LINK	This gene is referred to in FlyBase by the symbol Dmel\pre-mod(mdg4)-J (CG44882, FBgn0266176). It is a protein_coding_gene from Dmel. It has 2 annotated transcripts and 2 polypeptides (1 unique). Gene sequence location is 3R:21355692..21359768. Its molecular function is described by: . It is involved in the biological process described with: . No alleles are reported.
FBgn0052581	55.911	146.511	38.482	0	5.345	9.511	4.39343	4.52638e-05	0.0226283	UP	sordd2	LINK	This gene is referred to in FlyBase by the symbol Dmel\CG32581 (FBgn0052581). It is a protein_coding_gene from Dmel. It has 2 annotated transcripts and 2 polypeptides (1 unique). Gene sequence location is X:15796908..15799162. Its molecular function is described by: ubiquitin-like protein conjugating enzyme binding; ubiquitin-protein transferase activity; ubiquitin protein ligase activity; zinc i…
FBgn0053852	1.796	3.842	3.364	0	0	0	4.16675	0.0267216			His1:CG33852	LINK	The gene His1:CG33852 is referred to in FlyBase by the symbol Dmel\His1:CG33852 (CG33852, FBgn0053852). It is a protein_coding_gene from Dmel. It has one annotated transcript and one polypeptide. Gene sequence location is 2L:21516773..21517795. Its molecular function is described by: chromatin DNA binding. It is involved in the biological process described with: nucleosome assembly. No alleles ar…
FBgn0037427	2	1	3	0	0	0	4.09852	0.0322804			Osi17	LINK	The gene Osiris 17 is referred to in FlyBase by the symbol Dmel\Osi17 (CG15598, FBgn0037427). It is a protein_coding_gene from Dmel. It has 4 annotated transcripts and 4 polypeptides (2 unique). Gene sequence location is 3R:6311772..6327308. Its molecular function is described by: . It is involved in the biological process described with: . 4 alleles are reported. No phenotypic data is available.…
FBgn0267649	0	9.793	0	0	0	0	4.08218	0.30134			pre-mod(mdg4)-H	LINK	This gene is referred to in FlyBase by the symbol Dmel\pre-mod(mdg4)-H (CG45987, FBgn0267649). It is a protein_coding_gene from Dmel. It has 2 annotated transcripts and 2 polypeptides (1 unique). Gene sequence location is 3R:21354445..21359768. Its molecular function is described by: . It is involved in the biological process described with: . No alleles are reported.
FBgn0030665	0	5	2	0	0	0	3.98137	0.0546751			CG15646	LINK	This gene is referred to in FlyBase by the symbol Dmel\CG15646 (FBgn0030665). It is a protein_coding_gene from Dmel. It has 2 annotated transcripts and 2 polypeptides (1 unique). Gene sequence location is X:15667885..15671029. Its molecular function is described by: . It is involved in the biological process described with: . 4 alleles are reported. No phenotypic data is available. No phenotypic …
FBgn0053819	3.913	1.618	1.091	0	0	0	3.85983	0.0562247			His1:CG33819	LINK	The gene His1:CG33819 is referred to in FlyBase by the symbol Dmel\His1:CG33819 (CG33819, FBgn0053819). It is a protein_coding_gene from Dmel. It has one annotated transcript and one polypeptide. Gene sequence location is 2L:21461173..21462195. Its molecular function is described by: chromatin DNA binding. It is involved in the biological process described with: nucleosome assembly. No alleles ar…
FBgn0000826	1	4	1	0	0	0	3.82353	0.0611581			png	LINK	The gene pan gu is referred to in FlyBase by the symbol Dmel\png (CG11420, FBgn0000826). It is a protein_coding_gene from Dmel. It has one annotated transcript and one polypeptide. Gene sequence location is X:1356488..1357601. Its molecular function is described by: protein serine/threonine kinase activity; ATP binding. It is involved in the biological process described with: protein phosphorylat…
FBgn0014465	8	7	12.819	2	0	1	3.82329	0.00054898	0.134532		Cp7Fb	LINK	The gene Chorion protein b at 7F is referred to in FlyBase by the symbol Dmel\Cp7Fb (CG15350, FBgn0014465). It is a protein_coding_gene from Dmel. It has 2 annotated transcripts and 2 polypeptides (all unique). Gene sequence location is X:8473837..8476071. Its molecular function is unknown. It is involved in the biological process described with: chorion-containing eggshell formation. 10 alleles …
FBgn0053864	1.119	1.618	3.408	0	0	0	3.8004	0.0634755			His1:CG33864	LINK	The gene His1:CG33864 is referred to in FlyBase by the symbol Dmel\His1:CG33864 (CG33864, FBgn0053864). It is a protein_coding_gene from Dmel. It has one annotated transcript and one polypeptide. Gene sequence location is 2L:21536346..21537368. Its molecular function is described by: chromatin DNA binding. It is involved in the biological process described with: nucleosome assembly. 4 alleles are…
FBgn0266173	0	7.624	0	0	0	0	3.78216	0.109647			pre-mod(mdg4)-K	LINK	This gene is referred to in FlyBase by the symbol Dmel\pre-mod(mdg4)-K (CG44879, FBgn0266173). It is a protein_coding_gene from Dmel. It has 2 annotated transcripts and 2 polypeptides (1 unique). Gene sequence location is 3R:21355692..21359768. Its molecular function is described by: . It is involved in the biological process described with: . No alleles are reported.
FBgn0035922	0	12.002	1	0	1	0	3.77889	0.0349463	0.999974		Pex7	LINK	The gene Peroxin 7 is referred to in FlyBase by the symbol Dmel\Pex7 (CG6486, FBgn0035922). It is a protein_coding_gene from Dmel. It has 2 annotated transcripts and 2 polypeptides (1 unique). Gene sequence location is 3L:8647145..8651011. Its molecular function is described by: peroxisome matrix targeting signal-2 binding. It is involved in the biological process described with: peroxisome organ…
FBgn0004400	6	2	1	0	1	0	3.74485	0.0267366	0.999974		rhi	LINK	The gene rhino is referred to in FlyBase by the symbol Dmel\rhi (CG10683, FBgn0004400). It is a protein_coding_gene from Dmel. It has one annotated transcript and one polypeptide. Gene sequence location is 2R:17628491..17633516. Its molecular function is described by: chromatin binding. It is involved in the biological process described with 6 unique terms, many of which group under: aromatic com…
FBgn0036870	2	2	1	0	0	0	3.73619	0.0685797			CG14095	LINK	This gene is referred to in FlyBase by the symbol Dmel\CG14095 (FBgn0036870). It is a protein_coding_gene from Dmel. It has one annotated transcript and one polypeptide. Gene sequence location is 3L:19464049..19464759. Its molecular function is unknown. The biological processes in which it is involved are not known. 2 alleles are reported. No phenotypic data is available. The phenotypic class of …
FBgn0085599	4	0	0	0	0	0	3.70161	0.117246			CG41284	LINK	This gene is referred to in FlyBase by the symbol Dmel\CG41284 (FBgn0085599). It is a protein_coding_gene from Dmel. It has one annotated transcript and one polypeptide. Gene sequence location is 3L:26298455..26305572. Its molecular function is unknown. The biological processes in which it is involved are not known. One allele is reported. No phenotypic data is available. No phenotypic class data…
FBgn0030439	0	2.004	3	0	0	0	3.67116	0.0960422			CG12716	LINK	This gene is referred to in FlyBase by the symbol Dmel\CG12716 (FBgn0030439). It is a protein_coding_gene from Dmel. It has one annotated transcript and one polypeptide. Gene sequence location is X:12974683..12976231. Its molecular function is described by: . It is involved in the biological process described with: chorion-containing eggshell formation; cell differentiation; multicellular organis…
FBgn0267490	0	2.637	3.759	0	0	0	3.67116	0.0960422			Mst77Y-4	LINK	The gene Male-specific transcript 77Y 4 is referred to in FlyBase by the symbol Dmel\Mst77Y-4 (CG45763, FBgn0267490). It is a protein_coding_gene from Dmel. It has one annotated transcript and one polypeptide. Gene sequence location is Y:3284939..3285868. Its molecular function is described by: . It is involved in the biological process described with: spermatogenesis, exchange of chromosomal pro…
FBgn0053860	0	6	0	0	0	0.174	3.56163	0.151496			His3:CG33860	LINK	The gene His3:CG33860 is referred to in FlyBase by the symbol Dmel\His3:CG33860 (CG33860, FBgn0053860). It is a protein_coding_gene from Dmel. It has one annotated transcript and one polypeptide. Gene sequence location is 2L:21529795..21530323. Its molecular function is described by: protein heterodimerization activity; nucleosomal DNA binding. It is involved in the biological process described w…
FBgn0033096	1	4	4	0	1	0	3.55504	0.037018	0.999974		Zip42C.1	LINK	The gene Zinc/iron regulated transporter-related protein 42C.1 is referred to in FlyBase by the symbol Dmel\Zip42C.1 (CG9428, FBgn0033096). It is a protein_coding_gene from Dmel. It has one annotated transcript and one polypeptide. Gene sequence location is 2R:6716342..6717707. Its molecular function is described by: zinc ion transmembrane transporter activity. It is involved in the biological pr…
FBgn0053825	3.912	3.47	2.221	1.555	0	0	3.45838	0.0441911	0.999974		His1:CG33825	LINK	The gene His1:CG33825 is referred to in FlyBase by the symbol Dmel\His1:CG33825 (CG33825, FBgn0053825). It is a protein_coding_gene from Dmel. It has one annotated transcript and one polypeptide. Gene sequence location is 2L:21471259..21472281. Its molecular function is described by: chromatin DNA binding. It is involved in the biological process described with: nucleosome assembly. No alleles ar…
FBgn0002869	36.041	75.49	30	7	8	3	3.44411	5.43717e-12	2.24993e-08	UP	MtnB	LINK	The gene Metallothionein B is referred to in FlyBase by the symbol Dmel\MtnB (CG4312, FBgn0002869). It is a protein_coding_gene from Dmel. It has 3 annotated transcripts and 3 polypeptides (1 unique). Gene sequence location is 3R:20503102..20503746. Its molecular function is described by: metal ion binding; copper ion binding. It is involved in the biological process described with: metal ion hom…
FBgn0069056	2	2.501	0	0	0	0	3.383	0.149698			CG33226	LINK	This gene is referred to in FlyBase by the symbol Dmel\CG33226 (FBgn0069056). It is a protein_coding_gene from Dmel. It has one annotated transcript and one polypeptide. Gene sequence location is 2R:21538250..21539293. Its molecular function is described by: serine-type endopeptidase activity. It is involved in the biological process described with: proteolysis. One allele is reported. No phenoty…
FBgn0051617	1.12	7.996	1.091	0	1.626	0	3.37779	0.05938	0.999974		His1:CG31617	LINK	The gene His1:CG31617 is referred to in FlyBase by the symbol Dmel\His1:CG31617 (CG31617, FBgn0051617). It is a protein_coding_gene from Dmel. It has one annotated transcript and one polypeptide. Gene sequence location is 2L:21421855..21422877. Its molecular function is described by: chromatin DNA binding. It is involved in the biological process described with: nucleosome assembly. 2 alleles are…
FBgn0031104	3	8	11	0	1	2	3.37597	0.00347557	0.485776		jb	LINK	The gene jean-baptiste is referred to in FlyBase by the symbol Dmel\jb (CG15460, FBgn0031104). It is a protein_coding_gene from Dmel. It has one annotated transcript and one polypeptide. Gene sequence location is X:20390096..20390806. Its molecular function is described by: . It is involved in the biological process described with: pupation. 2 alleles are reported. No phenotypic data is available…
FBgn0032095	1	2	1	0	0	0	3.34121	0.138062			Toll-4	LINK	The gene Toll-4 is referred to in FlyBase by the symbol Dmel\Toll-4 (CG18241, FBgn0032095). It is a protein_coding_gene from Dmel. It has one annotated transcript and one polypeptide. Gene sequence location is 2L:9084107..9089440. Its molecular function is described by: signaling receptor activity. It is involved in the biological process described with: toll-like receptor signaling pathway; sign…
FBgn0033362	3	2.006	2	1	0	0	3.31404	0.0604246	0.999974		CG8172	LINK	This gene is referred to in FlyBase by the symbol Dmel\CG8172 (FBgn0033362). It is a protein_coding_gene from Dmel. It has 4 annotated transcripts and 4 polypeptides (all unique). Gene sequence location is 2R:9007234..9013526. Its molecular function is described by: serine-type endopeptidase activity. It is involved in the biological process described with: proteolysis. 5 alleles are reported. No…
FBgn0052453	3	0	0	0	0	0	3.28316	0.204795			CG32453	LINK	This gene is referred to in FlyBase by the symbol Dmel\CG32453 (FBgn0052453). It is a protein_coding_gene from Dmel. It has 2 annotated transcripts and 2 polypeptides (1 unique). Gene sequence location is 3L:22697230..22697970. Its molecular function is described by: . It is involved in the biological process described with: . 2 alleles are reported. No phenotypic data is available. No phenotypic…
FBgn0041250	1	3	0	0	0	0	3.20343	0.197192			Gr21a	LINK	The gene Gustatory receptor 21a is referred to in FlyBase by the symbol Dmel\Gr21a (CG13948, FBgn0041250). It is a protein_coding_gene from Dmel. It has 2 annotated transcripts and 2 polypeptides (1 unique). Gene sequence location is 2L:780482..782885. Its molecular function is described by: taste receptor activity; olfactory receptor activity. It is involved in the biological process described w…
FBgn0053855	1.207	3.611	0	0	0	0	3.20343	0.197192			His1:CG33855	LINK	The gene His1:CG33855 is referred to in FlyBase by the symbol Dmel\His1:CG33855 (CG33855, FBgn0053855). It is a protein_coding_gene from Dmel. It has one annotated transcript and one polypeptide. Gene sequence location is 2L:21521616..21522638. Its molecular function is described by: chromatin DNA binding. It is involved in the biological process described with: nucleosome assembly. No alleles ar…
FBgn0033515	1	3	0	0	0	0	3.20343	0.197192			Ir47a	LINK	The gene Ionotropic receptor 47a is referred to in FlyBase by the symbol Dmel\Ir47a (CG12900, FBgn0033515). It is a protein_coding_gene from Dmel. It has one annotated transcript and one polypeptide. Gene sequence location is 2R:10377128..10380109. Its molecular function is described by: ligand-gated ion channel activity. It is involved in the biological process described with: detection of chemi…
FBgn0038550	1	0	2	0	0	0	3.1767	0.19996			CG17801	LINK	This gene is referred to in FlyBase by the symbol Dmel\CG17801 (FBgn0038550). It is a protein_coding_gene from Dmel. It has one annotated transcript and one polypeptide. Gene sequence location is 3R:17805679..17807085. Its molecular function is described by: DNA-binding transcription factor activity, RNA polymerase II-specific; transcription regulatory region sequence-specific DNA binding; RNA po…
FBgn0053846	0	3.845	1.558	0	0	0	3.1546	0.21096			His1:CG33846	LINK	The gene His1:CG33846 is referred to in FlyBase by the symbol Dmel\His1:CG33846 (CG33846, FBgn0053846). It is a protein_coding_gene from Dmel. It has one annotated transcript and one polypeptide. Gene sequence location is 2L:21506684..21507706. Its molecular function is described by: chromatin DNA binding. It is involved in the biological process described with: nucleosome assembly. No alleles ar…
FBgn0003411	0	0	3	0	0	0	3.13328	0.246153			sisA	LINK	The gene sisterless A is referred to in FlyBase by the symbol Dmel\sisA (CG1641, FBgn0003411). It is a protein_coding_gene from Dmel. It has one annotated transcript and one polypeptide. Gene sequence location is X:11321579..11322357. Its molecular function is described by: protein binding; DNA-binding transcription factor activity; DNA-binding transcription factor activity, RNA polymerase II-spe…
FBgn0037992	0	7	1	0	0	1	3.12143	0.110676			CG4702	LINK	This gene is referred to in FlyBase by the symbol Dmel\CG4702 (FBgn0037992). It is a protein_coding_gene from Dmel. It has 4 annotated transcripts and 4 polypeptides (2 unique). Gene sequence location is 3R:12121583..12128201. Its molecular function is unknown. The biological processes in which it is involved are not known. 7 alleles are reported. No phenotypic data is available. The phenotypic c…
FBgn0051611	2	1.542	0	0	0	0	3.07547	0.225304			His4:CG31611	LINK	The gene His4:CG31611 is referred to in FlyBase by the symbol Dmel\His4:CG31611 (CG31611, FBgn0051611). It is a protein_coding_gene from Dmel. It has one annotated transcript and one polypeptide. Gene sequence location is 2L:21424593..21425005. Its molecular function is described by: DNA binding; histone binding; protein heterodimerization activity. It is involved in the biological process descri…
FBgn0004430	1.016	1.004	1.006	0	0	0	3.02006	0.214044			LysS	LINK	The gene Lysozyme S is referred to in FlyBase by the symbol Dmel\LysS (CG1165, FBgn0004430). It is a protein_coding_gene from Dmel. It has one annotated transcript and one polypeptide. Gene sequence location is 3L:1227747..1228238. Its molecular function is described by: lysozyme activity. It is involved in the biological process described with: defense response to Gram-negative bacterium. 3 alle…
FBgn0039199	1	1	1	0	0	0	3.02006	0.214044			CG13615	LINK	This gene is referred to in FlyBase by the symbol Dmel\CG13615 (FBgn0039199). It is a protein_coding_gene from Dmel. It has one annotated transcript and one polypeptide. Gene sequence location is 3R:24390592..24391870. Its molecular function is unknown. The biological processes in which it is involved are not known. 3 alleles are reported. No phenotypic data is available. The phenotypic class of …
FBgn0053807	1.207	1.618	1.091	0	0	0	3.02006	0.214044			His1:CG33807	LINK	The gene His1:CG33807 is referred to in FlyBase by the symbol Dmel\His1:CG33807 (CG33807, FBgn0053807). It is a protein_coding_gene from Dmel. It has one annotated transcript and one polypeptide. Gene sequence location is 2L:21431963..21432985. Its molecular function is described by: nucleosomal DNA binding; double-stranded DNA binding; chromatin DNA binding. It is involved in the biological proc…
FBgn0031034	7	7	18	1	3	2	3.00548	0.0008126	0.178173		CG14205	LINK	This gene is referred to in FlyBase by the symbol Dmel\CG14205 (FBgn0031034). It is a protein_coding_gene from Dmel. It has one annotated transcript and one polypeptide. Gene sequence location is X:19592609..19595548. Its molecular function is described by: transferase activity, transferring acyl groups other than amino-acyl groups. The biological processes in which it is involved are not known. …
FBgn0034281	3	0	2	1.012	0	0	2.98292	0.130091			CG14490	LINK	This gene is referred to in FlyBase by the symbol Dmel\CG14490 (FBgn0034281). It is a protein_coding_gene from Dmel. It has one annotated transcript and one polypeptide. Gene sequence location is 2R:17860760..17861591. Its molecular function is unknown. The biological processes in which it is involved are not known. 4 alleles are reported. No phenotypic data is available. The phenotypic class of …
FBgn0053873	0	4.376	0	0	0	0	2.98073	0.297284			His4:CG33873	LINK	The gene His4:CG33873 is referred to in FlyBase by the symbol Dmel\His4:CG33873 (CG33873, FBgn0053873). It is a protein_coding_gene from Dmel. It has one annotated transcript and one polypeptide. Gene sequence location is 2L:21524399..21524926. Its molecular function is described by: protein heterodimerization activity; histone binding; DNA binding. It is involved in the biological process descri…
FBgn0051454	0	1	2	0	0	0	2.96846	0.257156			CG31454	LINK	This gene is referred to in FlyBase by the symbol Dmel\CG31454 (FBgn0051454). It is a protein_coding_gene from Dmel. It has one annotated transcript and one polypeptide. Gene sequence location is 3R:8521658..8523520. Its molecular function is described by: . It is involved in the biological process described with: peroxisome organization. 5 alleles are reported. No phenotypic data is available. T…
FBgn0036131	0	3.591	3	1	0	0	2.92274	0.140642			CG12522	LINK	This gene is referred to in FlyBase by the symbol Dmel\CG12522 (FBgn0036131). It is a protein_coding_gene from Dmel. It has one annotated transcript and one polypeptide. Gene sequence location is 3L:11108235..11108732. Its molecular function is unknown. The biological processes in which it is involved are not known. 3 alleles are reported. No phenotypic data is available. The phenotypic class of …
FBgn0053837	3.535	1.618	1.091	0	1.74	0	2.88893	0.130803			His1:CG33837	LINK	The gene His1:CG33837 is referred to in FlyBase by the symbol Dmel\His1:CG33837 (CG33837, FBgn0053837). It is a protein_coding_gene from Dmel. It has one annotated transcript and one polypeptide. Gene sequence location is 2L:21491541..21492563. Its molecular function is described by: chromatin DNA binding. It is involved in the biological process described with: nucleosome assembly. 2 alleles are…
FBgn0085208	180.599	339.104	183.29	109.629	28.988	13.169	2.85827	7.57238e-05	0.0337999	UP	CG34179	LINK	This gene is referred to in FlyBase by the symbol Dmel\CG34179 (FBgn0085208). It is a protein_coding_gene from Dmel. It has 3 annotated transcripts and 3 polypeptides (2 unique). Gene sequence location is 2L:6046651..6048706. Its molecular function is described by: . It is involved in the biological process described with: . No alleles are reported. Summary of modENCODE Temporal Expression Profil…
FBgn0003065	1	2	0	0	0	0	2.85149	0.290953			CG2150	LINK	This gene is referred to in FlyBase by the symbol Dmel\CG2150 (FBgn0003065). It is a protein_coding_gene from Dmel. It has one annotated transcript and one polypeptide. Gene sequence location is 3R:31763304..31764772. Its molecular function is described by: structural constituent of chitin-based cuticle. It is involved in the biological process described with: defense response to other organism. …
FBgn0051354	0	9.346	3.038	0	0	2.096	2.84814	0.0789491	0.999974		Hsp70Bbb	LINK	The gene Hsp70Bbb is referred to in FlyBase by the symbol Dmel\Hsp70Bbb (CG5834, FBgn0051354). It is a protein_coding_gene from Dmel. It has one annotated transcript and one polypeptide. Gene sequence location is 3R:12502510..12504856. Its molecular function is described by 6 unique terms, many of which group under: protein binding; binding; hydrolase activity, acting on acid anhydrides, in phosp…
FBgn0051354	0	9.346	3.038	0	0	2.096	2.84814	0.0789491	0.999974		Hsp70Bbb	LINK	The gene Hsp70Bbb is referred to in FlyBase by the symbol Dmel\Hsp70Bbb (CG5834, FBgn0051354). It is a protein_coding_gene from Dmel. It has one annotated transcript and one polypeptide. Gene sequence location is 3R:12502510..12504856. Its molecular function is described by 6 unique terms, many of which group under: protein binding; binding; hydrolase activity, acting on acid anhydrides, in phosp…
FBgn0051354	0	9.346	3.038	0	0	2.096	2.84814	0.0789491	0.999974		Hsp70Bbb	LINK	The gene Hsp70Bbb is referred to in FlyBase by the symbol Dmel\Hsp70Bbb (CG5834, FBgn0051354). It is a protein_coding_gene from Dmel. It has one annotated transcript and one polypeptide. Gene sequence location is 3R:12502510..12504856. Its molecular function is described by 6 unique terms, many of which group under: protein binding; binding; hydrolase activity, acting on acid anhydrides, in phosp…
FBgn0051354	0	9.346	3.038	0	0	2.096	2.84814	0.0789491	0.999974		Hsp70Bbb	LINK	The gene Hsp70Bbb is referred to in FlyBase by the symbol Dmel\Hsp70Bbb (CG5834, FBgn0051354). It is a protein_coding_gene from Dmel. It has one annotated transcript and one polypeptide. Gene sequence location is 3R:12502510..12504856. Its molecular function is described by 6 unique terms, many of which group under: protein binding; binding; hydrolase activity, acting on acid anhydrides, in phosp…
FBgn0053831	0	7.993	0	0	1.626	0	2.83902	0.190658			His1:CG33831	LINK	The gene His1:CG33831 is referred to in FlyBase by the symbol Dmel\His1:CG33831 (CG33831, FBgn0053831). It is a protein_coding_gene from Dmel. It has one annotated transcript and one polypeptide. Gene sequence location is 2L:21481345..21482367. Its molecular function is described by: chromatin DNA binding. It is involved in the biological process described with: nucleosome assembly. No alleles ar…
FBgn0036532	1	1	3	1	0	0	2.83405	0.145317			CG13445	LINK	This gene is referred to in FlyBase by the symbol Dmel\CG13445 (FBgn0036532). It is a protein_coding_gene from Dmel. It has one annotated transcript and one polypeptide. Gene sequence location is 3L:15809485..15809977. Its molecular function is unknown. The biological processes in which it is involved are not known. 2 alleles are reported. No phenotypic data is available. The phenotypic class of …
FBgn0026397	2	8	6	0	2	1	2.82816	0.022129	0.999974		Or22b	LINK	The gene Odorant receptor 22b is referred to in FlyBase by the symbol Dmel\Or22b (CG4231, FBgn0026397). It is a protein_coding_gene from Dmel. It has one annotated transcript and one polypeptide. Gene sequence location is 2L:1522697..1524257. Its molecular function is described by: olfactory receptor activity; odorant binding; transmembrane signaling receptor activity. It is involved in the biolo…
FBgn0260812	0	23.58	0	4.614	0	0	2.82752	0.459881	0.999974		inaF-D	LINK	The gene inaF-D is referred to in FlyBase by the symbol Dmel\inaF-D (CG42563, FBgn0260812). It is a protein_coding_gene from Dmel. It has one annotated transcript and one polypeptide. Gene sequence location is X:11724668..11729099. Its molecular function is described by: channel regulator activity; calcium channel regulator activity. It is involved in the biological process described with: regula…
FBgn0036836	10.003	11.114	8.09	1	2.011	3.009	2.81147	0.00141568	0.253268		CG11619	LINK	This gene is referred to in FlyBase by the symbol Dmel\CG11619 (FBgn0036836). It is a protein_coding_gene from Dmel. It has one annotated transcript and one polypeptide. Gene sequence location is 3L:18985905..18988323. Its molecular function is described by: starch binding; glycerophosphocholine phosphodiesterase activity. It is involved in the biological process described with: glycerophospholip…
FBgn0039091	0	2	1	0	0	0	2.78962	0.311451			CG10182	LINK	This gene is referred to in FlyBase by the symbol Dmel\CG10182 (FBgn0039091). It is a protein_coding_gene from Dmel. It has one annotated transcript and one polypeptide. Gene sequence location is 3R:23587120..23589819. Its molecular function is described by: transferase activity, transferring acyl groups other than amino-acyl groups. The biological processes in which it is involved are not known.…
FBgn0034539	0	2	1	0	0	0	2.78962	0.311451			CG11159	LINK	This gene is referred to in FlyBase by the symbol Dmel\CG11159 (FBgn0034539). It is a protein_coding_gene from Dmel. It has one annotated transcript and one polypeptide. Gene sequence location is 2R:20655756..20656609. Its molecular function is described by: lysozyme activity. It is involved in the biological process described with: defense response to Gram-negative bacterium. 3 alleles are repor…
FBgn0030443	1	5	0	0	1	0	2.7701	0.177972			CG12715	LINK	This gene is referred to in FlyBase by the symbol Dmel\CG12715 (FBgn0030443). It is a protein_coding_gene from Dmel. It has 2 annotated transcripts and 2 polypeptides (1 unique). Gene sequence location is X:13052847..13055328. Its molecular function is described by: UDP-galactosyltransferase activity. It is involved in the biological process described with: N-glycan processing. 3 alleles are repo…
FBgn0030595	4.351	6.338	0	0	1	1	2.72775	0.0847652	0.999974		CG14406	LINK	This gene is referred to in FlyBase by the symbol Dmel\CG14406 (FBgn0030595). It is a protein_coding_gene from Dmel. It has 2 annotated transcripts and 2 polypeptides (1 unique). Gene sequence location is X:14909873..14910845. Its molecular function is unknown. The biological processes in which it is involved are not known. 4 alleles are reported. The phenotype of these alleles manifest in: mesot…
FBgn0261803	3	6.295	1	0	1	1	2.71912	0.074826	0.999974		CG42749	LINK	This gene is referred to in FlyBase by the symbol Dmel\CG42749 (FBgn0261803). It is a protein_coding_gene from Dmel. It has 3 annotated transcripts and 3 polypeptides (2 unique). Gene sequence location is X:5296066..5306288. Its molecular function is unknown. The biological processes in which it is involved are not known. 4 alleles are reported. No phenotypic data is available. The phenotypic cla…
FBgn0021776	4	65.039	4	6	4	3.002	2.70913	0.000772481	0.175536		mira	LINK	The gene miranda is referred to in FlyBase by the symbol Dmel\mira (CG12249, FBgn0021776). It is a protein_coding_gene from Dmel. It has 3 annotated transcripts and 3 polypeptides (all unique). Gene sequence location is 3R:19931799..19935120. Its molecular function is described by: protein binding; myosin binding. It is involved in the biological process described with 12 unique terms, many of wh…
FBgn0053836	2.002	0	0	0	0	0.174	2.69432	0.36732			His3:CG33836	LINK	The gene His3:CG33836 is referred to in FlyBase by the symbol Dmel\His3:CG33836 (CG33836, FBgn0053836). It is a protein_coding_gene from Dmel. It has one annotated transcript and one polypeptide. Gene sequence location is 2L:21489830..21490358. Its molecular function is described by: protein heterodimerization activity; nucleosomal DNA binding. It is involved in the biological process described w…
FBgn0053830	2	0	0	0	0	0.174	2.69432	0.36732			His3:CG33830	LINK	The gene His3:CG33830 is referred to in FlyBase by the symbol Dmel\His3:CG33830 (CG33830, FBgn0053830). It is a protein_coding_gene from Dmel. It has one annotated transcript and one polypeptide. Gene sequence location is 2L:21479636..21480164. Its molecular function is described by: protein heterodimerization activity; nucleosomal DNA binding. It is involved in the biological process described w…
FBgn0053859	2.258	0	0	0	0	0	2.69432	0.36732			His2A:CG33859	LINK	The gene His2A:CG33859 is referred to in FlyBase by the symbol Dmel\His2A:CG33859 (CG33859, FBgn0053859). It is a protein_coding_gene from Dmel. It has one annotated transcript and one polypeptide. Gene sequence location is 2L:21528341..21528833. Its molecular function is described by: protein heterodimerization activity; DNA binding. It is involved in the biological process described with: chrom…
FBgn0036791	2	0	0	0	0	0	2.69432	0.36732			CG7271	LINK	This gene is referred to in FlyBase by the symbol Dmel\CG7271 (FBgn0036791). It is a protein_coding_gene from Dmel. It has one annotated transcript and one polypeptide. Gene sequence location is 3L:18588759..18590165. Its molecular function is described by: nucleic acid binding. It is involved in the biological process described with: . 7 alleles are reported. No phenotypic data is available. No …
FBgn0031957	3.359	0	1.035	1.063	0	0	2.67911	0.200445			TwdlE	LINK	The gene TweedleE is referred to in FlyBase by the symbol Dmel\TwdlE (CG14534, FBgn0031957). It is a protein_coding_gene from Dmel. It has one annotated transcript and one polypeptide. Gene sequence location is 2L:7857957..7860839. Its molecular function is described by: structural constituent of chitin-based cuticle. It is involved in the biological process described with: chitin-based cuticle d…
FBgn0053923	1	0	1	0	0	0	2.61312	0.35879			CG33923	LINK	This gene is referred to in FlyBase by the symbol Dmel\CG33923 (FBgn0053923). It is a protein_coding_gene from Dmel. It has one annotated transcript and one polypeptide. Gene sequence location is 2L:1341365..1342095. Its molecular function is described by: . It is involved in the biological process described with: . 2 alleles are reported. No phenotypic data is available. No phenotypic class data…
FBgn0037590	1	0	1	0	0	0	2.61312	0.35879			Or85b	LINK	The gene Odorant receptor 85b is referred to in FlyBase by the symbol Dmel\Or85b (CG11735, FBgn0037590). It is a protein_coding_gene from Dmel. It has one annotated transcript and one polypeptide. Gene sequence location is 3R:8510077..8511358. Its molecular function is described by: odorant binding; olfactory receptor activity. It is involved in the biological process described with: detection of…
FBgn0053783	1	0	1	0	0	0	2.61312	0.35879			CG33783	LINK	This gene is referred to in FlyBase by the symbol Dmel\CG33783 (FBgn0053783). It is a protein_coding_gene from Dmel. It has one annotated transcript and one polypeptide. Gene sequence location is 3R:10066770..10067567. Its molecular function is described by: . It is involved in the biological process described with: . 2 alleles are reported. No phenotypic data is available. No phenotypic class da…
FBgn0085219	1	0	1	0	0	0	2.61312	0.35879			CG34190	LINK	This gene is referred to in FlyBase by the symbol Dmel\CG34190 (FBgn0085219). It is a protein_coding_gene from Dmel. It has one annotated transcript and one polypeptide. Gene sequence location is 2R:16946455..16947554. Its molecular function is described by: . It is involved in the biological process described with: . 3 alleles are reported. No phenotypic data is available. No phenotypic class da…
FBgn0266434	0	3	0	0.5	0	0	2.56803	0.420784			CG45064	LINK	This gene is referred to in FlyBase by the symbol Dmel\CG45064 (FBgn0266434). It is a protein_coding_gene from Dmel. It has one annotated transcript and one polypeptide. Gene sequence location is X:14875370..14882586. Its molecular function is described by: . It is involved in the biological process described with: . 3 alleles are reported. No phenotypic data is available. No phenotypic class dat…
FBgn0260713	0	3	0	0	0	0	2.56803	0.420784			CG42544	LINK	This gene is referred to in FlyBase by the symbol Dmel\CG42544 (FBgn0260713).The gene has a gene model, but the supporting evidence is inconclusive. It is a protein_coding_gene from Dmel. It has one annotated transcript and one polypeptide. Gene sequence location is 3R:7304592..7304954. Its molecular function is described by: . It is involved in the biological process described with: . One allele…
FBgn0034224	0	3	0	0	0	0	2.56803	0.420784			insb	LINK	The gene insensible is referred to in FlyBase by the symbol Dmel\insb (CG6520, FBgn0034224). It is a protein_coding_gene from Dmel. It has 2 annotated transcripts and 2 polypeptides (1 unique). Gene sequence location is 2R:17475214..17476272. Its molecular function is described by: . It is involved in the biological process described with: negative regulation of Notch signaling pathway. 7 alleles…
FBgn0037576	0	3	0	0	0	0	2.56803	0.420784			Or85a	LINK	The gene Odorant receptor 85a is referred to in FlyBase by the symbol Dmel\Or85a (CG7454, FBgn0037576). It is a protein_coding_gene from Dmel. It has one annotated transcript and one polypeptide. Gene sequence location is 3R:8321747..8323054. Its molecular function is described by: odorant binding; olfactory receptor activity. It is involved in the biological process described with: detection of …
FBgn0266174	7.775	8.247	0	4.686	0	0	2.55647	0.0584821	0.999974		pre-mod(mdg4)-L	LINK	This gene is referred to in FlyBase by the symbol Dmel\pre-mod(mdg4)-L (CG44880, FBgn0266174). It is a protein_coding_gene from Dmel. It has 2 annotated transcripts and 2 polypeptides (1 unique). Gene sequence location is 3R:21355692..21359768. Its molecular function is described by: . It is involved in the biological process described with: . No alleles are reported.
FBgn0053875	0	0	2.001	0	0	0	2.54689	0.416493			His4:CG33875	LINK	The gene His4:CG33875 is referred to in FlyBase by the symbol Dmel\His4:CG33875 (CG33875, FBgn0053875). It is a protein_coding_gene from Dmel. It has one annotated transcript and one polypeptide. Gene sequence location is 2L:21519556..21520083. Its molecular function is described by: protein heterodimerization activity; DNA binding; histone binding. It is involved in the biological process descri…
FBgn0261952	0	0	2	0	0	0	2.54689	0.416493			srw	LINK	The gene shrew is referred to in FlyBase by the symbol Dmel\srw (CG11582, FBgn0261952). It is a protein_coding_gene from Dmel. It has one annotated transcript and one polypeptide. Gene sequence location is 3L:4282956..4283478. Its molecular function is unknown. It is involved in the biological process described with: amnioserosa formation; regulation of BMP signaling pathway; positive regulation …
FBgn0267417	0	0	2.027	0	0	0	2.54689	0.416493			CG45770	LINK	This gene is referred to in FlyBase by the symbol Dmel\CG45770 (FBgn0267417). It is a protein_coding_gene from Dmel. It has one annotated transcript and one polypeptide. Gene sequence location is Y:3349651..3350374. Its molecular function is unknown. The biological processes in which it is involved are not known. No alleles are reported.
FBgn0039779	0	0	2	0	0	0	2.54689	0.416493			PH4alphaSG2	LINK	The gene prolyl-4-hydroxylase-alpha SG2 is referred to in FlyBase by the symbol Dmel\PH4alphaSG2 (CG1546, FBgn0039779). It is a protein_coding_gene from Dmel. It has one annotated transcript and one polypeptide. Gene sequence location is 3R:30490074..30491987. Its molecular function is described by: oxidoreductase activity, acting on single donors with incorporation of molecular oxygen, incorpora…
FBgn0031446	3	4.007	1	1	1	0	2.52431	0.113584	0.999974		Trf5	LINK	The gene TBP-related factor 5 is referred to in FlyBase by the symbol Dmel\Trf5 (CG15398, FBgn0031446). It is a protein_coding_gene from Dmel. It has one annotated transcript and one polypeptide. Gene sequence location is 2L:2695330..2696437. Its molecular function is described by: DNA binding; RNA polymerase II general transcription initiation factor activity. It is involved in the biological pr…
FBgn0261630	0	4	1	1	0	0	2.49622	0.252506			CG42713	LINK	This gene is referred to in FlyBase by the symbol Dmel\CG42713 (FBgn0261630). It is a protein_coding_gene from Dmel. It has 2 annotated transcripts and 2 polypeptides (1 unique). Gene sequence location is 2L:8891440..8892180. Its molecular function is described by: serine-type endopeptidase inhibitor activity. The biological processes in which it is involved are not known. One allele is reported.…
FBgn0053927	0	4	1	1	0	0	2.49622	0.252506			CG33927	LINK	This gene is referred to in FlyBase by the symbol Dmel\CG33927 (FBgn0053927). It is a protein_coding_gene from Dmel. It has one annotated transcript and one polypeptide. Gene sequence location is 3R:4689951..4690608. Its molecular function is described by: . It is involved in the biological process described with: . One allele is reported. No phenotypic data is available. No phenotypic class data…
FBgn0053904	1.138	1.474	2.31	0	0	1.393	2.49441	0.221807			His2B:CG33904	LINK	The gene His2B:CG33904 is referred to in FlyBase by the symbol Dmel\His2B:CG33904 (CG33904, FBgn0053904). It is a protein_coding_gene from Dmel. It has one annotated transcript and one polypeptide. Gene sequence location is 2L:21438170..21438764. Its molecular function is described by: DNA binding; protein heterodimerization activity. It is involved in the biological process described with: chrom…
FBgn0004782	0	2	13.952	0	3	1.001	2.44584	0.0652796	0.999974		Ccp84Ab	LINK	The gene Ccp84Ab is referred to in FlyBase by the symbol Dmel\Ccp84Ab (CG1252, FBgn0004782). It is a protein_coding_gene from Dmel. It has one annotated transcript and one polypeptide. Gene sequence location is 3R:6701968..6702877. Its molecular function is described by: structural constituent of chitin-based larval cuticle; structural constituent of cuticle. It is involved in the biological proc…
FBgn0035572	2.046	2	0	0	0	1.007	2.41868	0.261243			CG13711	LINK	This gene is referred to in FlyBase by the symbol Dmel\CG13711 (FBgn0035572). It is a protein_coding_gene from Dmel. It has one annotated transcript and one polypeptide. Gene sequence location is 3L:4757883..4758708. Its molecular function is unknown. It is involved in the biological process described with: regulation of localization. 4 alleles are reported. No phenotypic data is available. The p…
FBgn0040737	4	3.973	0	1	1.947	0	2.3965	0.157992	0.999974		Tango8	LINK	The gene Transport and Golgi organization 8 is referred to in FlyBase by the symbol Dmel\Tango8 (CG14503, FBgn0040737). It is a protein_coding_gene from Dmel. It has one annotated transcript and one polypeptide. Gene sequence location is 2R:18311822..18311998. Its molecular function is described by: . It is involved in the biological process described with: protein secretion; Golgi organization. …
FBgn0035918	3	5.113	6	2	0	2	2.39514	0.04197	0.999974		Cdc6	LINK	The gene Cdc6 is referred to in FlyBase by the symbol Dmel\Cdc6 (CG5971, FBgn0035918). It is a protein_coding_gene from Dmel. It has one annotated transcript and one polypeptide. Gene sequence location is 3L:8631509..8634069. Its molecular function is described by: DNA replication origin binding. It is involved in the biological process described with: mitotic DNA replication checkpoint; mitotic …
FBgn0052405	1	1	0	0	0	0	2.38251	0.433627			Cpr65Av	LINK	The gene Cuticular protein 65Av is referred to in FlyBase by the symbol Dmel\Cpr65Av (CG32405, FBgn0052405). It is a protein_coding_gene from Dmel. It has one annotated transcript and one polypeptide. Gene sequence location is 3L:6139223..6139974. Its molecular function is described by: structural constituent of chitin-based larval cuticle; structural constituent of cuticle. It is involved in the…
FBgn0035887	1	1.012	0	0	0	0	2.38251	0.433627			Jon66Cii	LINK	The gene Jonah 66Cii is referred to in FlyBase by the symbol Dmel\Jon66Cii (CG7170, FBgn0035887). It is a protein_coding_gene from Dmel. It has one annotated transcript and one polypeptide. Gene sequence location is 3L:8392820..8393649. Its molecular function is described by: serine-type endopeptidase activity. It is involved in the biological process described with: proteolysis. 6 alleles are re…
FBgn0036860	1	1	0	0	0	0	2.38251	0.433627			CG14086	LINK	This gene is referred to in FlyBase by the symbol Dmel\CG14086 (FBgn0036860). It is a protein_coding_gene from Dmel. It has one annotated transcript and one polypeptide. Gene sequence location is 3L:19275791..19279919. Its molecular function is unknown. The biological processes in which it is involved are not known. 3 alleles are reported. No phenotypic data is available. The phenotypic classes o…
FBgn0263741	1	1	0	0	0	0	2.38251	0.433627			CG43666	LINK	This gene is referred to in FlyBase by the symbol Dmel\CG43666 (FBgn0263741). It is a protein_coding_gene from Dmel. It has one annotated transcript and one polypeptide. Gene sequence location is 2R:20788195..20789217. Its molecular function is unknown. The biological processes in which it is involved are not known. One allele is reported. The phenotype of this allele manifest in: trichogen cell.…
FBgn0028999	1	1	0	0	0	0	2.38251	0.433627			nerfin-1	LINK	The gene nervous fingers 1 is referred to in FlyBase by the symbol Dmel\nerfin-1 (CG13906, FBgn0028999). It is a protein_coding_gene from Dmel. It has one annotated transcript and one polypeptide. Gene sequence location is 3L:909112..912319. Its molecular function is described by: DNA-binding transcription repressor activity, RNA polymerase II-specific; nucleic acid binding. It is involved in the…
FBgn0262362	1	1	0	0	0	0	2.38251	0.433627			CG43060	LINK	This gene is referred to in FlyBase by the symbol Dmel\CG43060 (FBgn0262362). It is a protein_coding_gene from Dmel. It has 2 annotated transcripts and 2 polypeptides (1 unique). Gene sequence location is 3R:8041224..8055970. Its molecular function is described by: . It is involved in the biological process described with: . No alleles are reported.
FBgn0011653	1	1.001	0	0	0	0	2.38251	0.433627			mas	LINK	The gene masquerade is referred to in FlyBase by the symbol Dmel\mas (CG15002, FBgn0011653). It is a protein_coding_gene from Dmel. It has 2 annotated transcripts and 2 polypeptides (all unique). Gene sequence location is 3L:4161666..4167464. Its molecular function is unknown. It is involved in the biological process described with 7 unique terms, many of which group under: multicellular organism…
FBgn0053901	1	1.541	0	0	0	0	2.38251	0.433627			His4:CG33901	LINK	The gene His4:CG33901 is referred to in FlyBase by the symbol Dmel\His4:CG33901 (CG33901, FBgn0053901). It is a protein_coding_gene from Dmel. It has one annotated transcript and one polypeptide. Gene sequence location is 2L:21453790..21454202. Its molecular function is described by: histone binding; DNA binding; protein heterodimerization activity. It is involved in the biological process descri…
FBgn0053858	1.207	1.576	0	0	0	0	2.38251	0.433627			His1:CG33858	LINK	The gene His1:CG33858 is referred to in FlyBase by the symbol Dmel\His1:CG33858 (CG33858, FBgn0053858). It is a protein_coding_gene from Dmel. It has one annotated transcript and one polypeptide. Gene sequence location is 2L:21526459..21527481. Its molecular function is described by: chromatin DNA binding. It is involved in the biological process described with: nucleosome assembly. No alleles ar…
FBgn0002633	1	1	0	0	0	0	2.38251	0.433627			E(spl)m7-HLH	LINK	The gene Enhancer of split m7, helix-loop-helix is referred to in FlyBase by the symbol Dmel\E(spl)m7-HLH (CG8361, FBgn0002633). It is a protein_coding_gene from Dmel. It has one annotated transcript and one polypeptide. Gene sequence location is 3R:26037038..26038019. Its molecular function is described by 7 unique terms, many of which group under: binding; DNA binding; protein binding; organic …
FBgn0036817	1	1	0	0	0	0	2.38251	0.433627			CG6865	LINK	This gene is referred to in FlyBase by the symbol Dmel\CG6865 (FBgn0036817). It is a protein_coding_gene from Dmel. It has one annotated transcript and one polypeptide. Gene sequence location is 3L:18863647..18865514. Its molecular function is described by: serine-type endopeptidase activity. It is involved in the biological process described with: proteolysis. 4 alleles are reported. No phenotyp…
FBgn0053509	1	2	1	1	0	0	2.38049	0.257265			CG33509	LINK	This gene is referred to in FlyBase by the symbol Dmel\CG33509 (FBgn0053509). It is a protein_coding_gene from Dmel. It has one annotated transcript and one polypeptide. Gene sequence location is 2L:21084605..21086506. Its molecular function is described by: . It is involved in the biological process described with: . 2 alleles are reported. No phenotypic data is available. The phenotypic class o…
FBgn0031146	16.569	12.145	11.282	14.708	0	0	2.3636	0.19537	0.999974		CG15449	LINK	This gene is referred to in FlyBase by the symbol Dmel\CG15449 (FBgn0031146). It is a protein_coding_gene from Dmel. It has one annotated transcript and one polypeptide. Gene sequence location is X:21039514..21040605. Its molecular function is unknown. It is involved in the biological process described with: septate junction assembly. 4 alleles are reported. No phenotypic data is available. The p…
FBgn0036601	4	2	1	0	2	0	2.36153	0.152076	0.999974		CG13063	LINK	This gene is referred to in FlyBase by the symbol Dmel\CG13063 (FBgn0036601). It is a protein_coding_gene from Dmel. It has one annotated transcript and one polypeptide. Gene sequence location is 3L:16306600..16307205. Its molecular function is unknown. The biological processes in which it is involved are not known. 5 alleles are reported. No phenotypic data is available. The phenotypic class of …
FBgn0036948	3	2	4	3	0	0	2.34152	0.108041	0.999974		CG7298	LINK	This gene is referred to in FlyBase by the symbol Dmel\CG7298 (FBgn0036948). It is a protein_coding_gene from Dmel. It has one annotated transcript and one polypeptide. Gene sequence location is 3L:20202070..20203687. Its molecular function is described by: chitin binding. It is involved in the biological process described with: chitin metabolic process. 5 alleles are reported. No phenotypic data…
FBgn0262363	163.948	329.78	140.751	87.935	34.696	59.809	2.32613	2.40941e-17	3.01128e-13	UP	CG43061	LINK	This gene is referred to in FlyBase by the symbol Dmel\CG43061 (FBgn0262363). It is a protein_coding_gene from Dmel. It has one annotated transcript and one polypeptide. Gene sequence location is 3R:8049673..8050059. Its molecular function is described by: . It is involved in the biological process described with: pathogenesis. No alleles are reported.
FBgn0264711	9	14.218	8	4	4	1	2.31299	0.0036581	0.494224		CG43980	LINK	This gene is referred to in FlyBase by the symbol Dmel\CG43980 (FBgn0264711). It is a protein_coding_gene from Dmel. It has 2 annotated transcripts and 2 polypeptides (all unique). Gene sequence location is 3L:21644958..21666306. Its molecular function is described by: protein heterodimerization activity. The biological processes in which it is involved are not known. 11 alleles are reported. The…
FBgn0036250	0	1	1	0	0	0	2.30791	0.461398			Ir68b	LINK	The gene Ionotropic receptor 68b is referred to in FlyBase by the symbol Dmel\Ir68b (CG17152, FBgn0036250). It is a protein_coding_gene from Dmel. It has one annotated transcript and one polypeptide. Gene sequence location is 3L:12125487..12127394. Its molecular function is described by: ligand-gated ion channel activity. It is involved in the biological process described with: detection of chemi…
FBgn0045482	0	1	1	0	0	0	2.30791	0.461398			Gr59b	LINK	The gene Gustatory receptor 59b is referred to in FlyBase by the symbol Dmel\Gr59b (CG30191, FBgn0045482). It is a protein_coding_gene from Dmel. It has one annotated transcript and one polypeptide. Gene sequence location is 2R:23082203..23083366. Its molecular function is described by: taste receptor activity. It is involved in the biological process described with: sensory perception of taste. …
FBgn0036577	0	1.009	1	0	0	0	2.30791	0.461398			CG13073	LINK	This gene is referred to in FlyBase by the symbol Dmel\CG13073 (FBgn0036577). It is a protein_coding_gene from Dmel. It has one annotated transcript and one polypeptide. Gene sequence location is 3L:16213051..16217303. Its molecular function is unknown. The biological processes in which it is involved are not known. 3 alleles are reported. The phenotype of these alleles manifest in: ganglion moth…
FBgn0037662	0	1.001	1	0	0	0	2.30791	0.461398			CG11997	LINK	This gene is referred to in FlyBase by the symbol Dmel\CG11997 (FBgn0037662). It is a protein_coding_gene from Dmel. It has one annotated transcript and one polypeptide. Gene sequence location is 3R:9177517..9179098. Its molecular function is unknown. The biological processes in which it is involved are not known. 5 alleles are reported. No phenotypic data is available. No phenotypic class data i…
FBgn0032491	0	1	1	0	0	0	2.30791	0.461398			CG16815	LINK	This gene is referred to in FlyBase by the symbol Dmel\CG16815 (FBgn0032491). It is a protein_coding_gene from Dmel. It has one annotated transcript and one polypeptide. Gene sequence location is 2L:13229832..13230549. Its molecular function is unknown. The biological processes in which it is involved are not known. 3 alleles are reported. No phenotypic data is available. The phenotypic class of …
FBgn0030016	0	1	1	0	0	0	2.30791	0.461398			Or7a	LINK	The gene Odorant receptor 7a is referred to in FlyBase by the symbol Dmel\Or7a (CG10759, FBgn0030016). It is a protein_coding_gene from Dmel. It has one annotated transcript and one polypeptide. Gene sequence location is X:8164266..8165708. Its molecular function is described by: olfactory receptor activity; odorant binding. It is involved in the biological process described with: detection of ch…
FBgn0030375	0	1	1	0	0	0	2.30791	0.461398			CG11356	LINK	This gene is referred to in FlyBase by the symbol Dmel\CG11356 (FBgn0030375). It is a protein_coding_gene from Dmel. It has one annotated transcript and one polypeptide. Gene sequence location is X:12102944..12103840. Its molecular function is described by: GTP binding. It is involved in the biological process described with: cilium assembly. 4 alleles are reported. No phenotypic data is availabl…
FBgn0052602	1.005	4	2	1.001	1	0	2.26357	0.173831	0.999974		Muc12Ea	LINK	The gene Mucin 12Ea is referred to in FlyBase by the symbol Dmel\Muc12Ea (CG32602, FBgn0052602). It is a protein_coding_gene from Dmel. It has one annotated transcript and one polypeptide. Gene sequence location is X:14277735..14288161. Its molecular function is described by: extracellular matrix structural constituent. It is involved in the biological process described with: chorion-containing e…
FBgn0035510	1	3.58	0	0	0	1.298	2.25198	0.316177			Cpr64Aa	LINK	The gene Cuticular protein 64Aa is referred to in FlyBase by the symbol Dmel\Cpr64Aa (CG15006, FBgn0035510). It is a protein_coding_gene from Dmel. It has one annotated transcript and one polypeptide. Gene sequence location is 3L:4207838..4209178. Its molecular function is described by: structural constituent of chitin-based larval cuticle; structural constituent of cuticle. It is involved in the…
FBgn0260479	3.74	4.695	3.65	0	0	3.615	2.23802	0.109299	0.999974		CG31904	LINK	This gene is referred to in FlyBase by the symbol Dmel\CG31904 (FBgn0260479).The gene has a gene model, but the supporting evidence is inconclusive. It is a protein_coding_gene from Dmel. It has 2 annotated transcripts and 2 polypeptides (1 unique). Gene sequence location is 2L:7734415..7738809. Its molecular function is described by: neurotransmitter transmembrane transporter activity; neurotran…
FBgn0053337	2	3	1	2	0	0	2.2109	0.215006			CG33337	LINK	This gene is referred to in FlyBase by the symbol Dmel\CG33337 (FBgn0053337). It is a protein_coding_gene from Dmel. It has one annotated transcript and one polypeptide. Gene sequence location is 3R:23590141..23592769. Its molecular function is described by: transferase activity, transferring acyl groups other than amino-acyl groups. It is involved in the biological process described with: . 2 al…
FBgn0053828	0	3.727	1.091	0	1.626	0	2.20903	0.32882			His1:CG33828	LINK	The gene His1:CG33828 is referred to in FlyBase by the symbol Dmel\His1:CG33828 (CG33828, FBgn0053828). It is a protein_coding_gene from Dmel. It has one annotated transcript and one polypeptide. Gene sequence location is 2L:21476302..21477324. Its molecular function is described by: chromatin DNA binding. It is involved in the biological process described with: nucleosome assembly. No alleles ar…
FBgn0038621	0	3.584	1	1.014	0	0	2.20639	0.337075			CG10864	LINK	This gene is referred to in FlyBase by the symbol Dmel\CG10864 (FBgn0038621). It is a protein_coding_gene from Dmel. It has one annotated transcript and one polypeptide. Gene sequence location is 3R:18410080..18411631. Its molecular function is described by: potassium ion leak channel activity; potassium channel activity. It is involved in the biological process described with: potassium ion tran…
FBgn0051559	1	0	2	1	0	0	2.20244	0.3336			CG31559	LINK	This gene is referred to in FlyBase by the symbol Dmel\CG31559 (FBgn0051559). It is a protein_coding_gene from Dmel. It has one annotated transcript and one polypeptide. Gene sequence location is 3R:6150116..6157235. Its molecular function is described by: protein disulfide oxidoreductase activity; electron transfer activity. It is involved in the biological process described with: cell redox hom…
FBgn0037630	2	2.02	2.015	1	0	1.003	2.19795	0.190001			Ir85a	LINK	The gene Ionotropic receptor 85a is referred to in FlyBase by the symbol Dmel\Ir85a (CG11775, FBgn0037630). It is a protein_coding_gene from Dmel. It has one annotated transcript and one polypeptide. Gene sequence location is 3R:8794684..8796966. Its molecular function is described by: ligand-gated ion channel activity. It is involved in the biological process described with: detection of chemica…
FBgn0038592	3	1	2	0	2	0	2.17482	0.199347	0.999974		CG18599	LINK	This gene is referred to in FlyBase by the symbol Dmel\CG18599 (FBgn0038592). It is a protein_coding_gene from Dmel. It has one annotated transcript and one polypeptide. Gene sequence location is 3R:18267789..18271172. Its molecular function is described by: DNA-binding transcription repressor activity, RNA polymerase II-specific; RNA polymerase II cis-regulatory region sequence-specific DNA bind…
FBgn0053669	3.528	3.23	3.588	1.172	1.645	1.424	2.15869	0.110999	0.999974		CG33669	LINK	This gene is referred to in FlyBase by the symbol Dmel\CG33669 (FBgn0053669). It is a protein_coding_gene from Dmel. It has one annotated transcript and one polypeptide. Gene sequence location is X:6399455..6400100. Its molecular function is described by: . It is involved in the biological process described with: . No alleles are reported. Summary of modENCODE Temporal Expression Profile: Tempora…
FBgn0039042	3	3.099	0	1	0	1	2.15214	0.224432			CG13837	LINK	This gene is referred to in FlyBase by the symbol Dmel\CG13837 (FBgn0039042). It is a protein_coding_gene from Dmel. It has one annotated transcript and one polypeptide. Gene sequence location is 3R:23043990..23044661. Its molecular function is described by: chitin binding. It is involved in the biological process described with: chitin metabolic process. 5 alleles are reported. No phenotypic dat…
FBgn0033587	2	1	0	1	0	0	2.10432	0.36397			CG13218	LINK	This gene is referred to in FlyBase by the symbol Dmel\CG13218 (FBgn0033587). It is a protein_coding_gene from Dmel. It has one annotated transcript and one polypeptide. Gene sequence location is 2R:11233192..11233714. Its molecular function is unknown. The biological processes in which it is involved are not known. 2 alleles are reported. No phenotypic data is available. The phenotypic class of …
FBgn0263400	2	1.43	0	0	0	1	2.10293	0.358677			CG43446	LINK	This gene is referred to in FlyBase by the symbol Dmel\CG43446 (FBgn0263400). It is a protein_coding_gene from Dmel. It has 2 annotated transcripts and 2 polypeptides (all unique). Gene sequence location is 3R:20986504..20987936. Its molecular function is unknown. The biological processes in which it is involved are not known. No alleles are reported.
FBgn0010197	1	3	2	1	0	1	2.1008	0.220824			Gyc32E	LINK	The gene Guanylyl cyclase at 32E is referred to in FlyBase by the symbol Dmel\Gyc32E (CG33114, FBgn0010197). It is a protein_coding_gene from Dmel. It has 3 annotated transcripts and 3 polypeptides (all unique). Gene sequence location is 2L:11138759..11149101. Its molecular function is described by: guanylate cyclase activity; ATP binding; peptide receptor activity; signaling receptor activity. I…
FBgn0040795	1	3	2	1	1	0	2.07969	0.22404			CG13038	LINK	This gene is referred to in FlyBase by the symbol Dmel\CG13038 (FBgn0040795). It is a protein_coding_gene from Dmel. It has one annotated transcript and one polypeptide. Gene sequence location is 3L:16327258..16327893. Its molecular function is described by: . It is involved in the biological process described with: . 3 alleles are reported. No phenotypic data is available. The phenotypic class o…
FBgn0267964	4.724	10.391	5.373	0.549	0	6.639	2.07812	0.0574866	0.999974		CG46244	LINK	This gene is referred to in FlyBase by the symbol Dmel\CG46244 (FBgn0267964). It is a protein_coding_gene from Dmel. It has one annotated transcript and one polypeptide. Gene sequence location is 2L:19606569..19731561. Its molecular function is unknown. The biological processes in which it is involved are not known. 6 alleles are reported. No phenotypic data is available. No phenotypic class data…
FBgn0036709	0	2	0	0	0	0	2.07787	0.579429			Or74a	LINK	The gene Odorant receptor 74a is referred to in FlyBase by the symbol Dmel\Or74a (CG13726, FBgn0036709). It is a protein_coding_gene from Dmel. It has one annotated transcript and one polypeptide. Gene sequence location is 3L:17327733..17329169. Its molecular function is described by: odorant binding; olfactory receptor activity. It is involved in the biological process described with: detection …
FBgn0053476	0	2	0	0	0	0	2.07787	0.579429			CG33476	LINK	This gene is referred to in FlyBase by the symbol Dmel\CG33476 (FBgn0053476). It is a protein_coding_gene from Dmel. It has one annotated transcript and one polypeptide. Gene sequence location is 2R:10409985..10410570. Its molecular function is described by: . It is involved in the biological process described with: . 2 alleles are reported. No phenotypic data is available. No phenotypic class da…
FBgn0085225	0	2	0	0	0	0	2.07787	0.579429			CG34196	LINK	This gene is referred to in FlyBase by the symbol Dmel\CG34196 (FBgn0085225). It is a protein_coding_gene from Dmel. It has one annotated transcript and one polypeptide. Gene sequence location is 2R:18109985..18110494. Its molecular function is described by: . It is involved in the biological process described with: . No alleles are reported. Summary of modENCODE Temporal Expression Profile: Temp…
FBgn0266615	0	2.165	0	0	0	0	2.07787	0.579429			CG45122	LINK	This gene is referred to in FlyBase by the symbol Dmel\CG45122 (FBgn0266615). It is a protein_coding_gene from Dmel. It has one annotated transcript and one polypeptide. Gene sequence location is 3R:13044157..13044529. Its molecular function is described by: . It is involved in the biological process described with: . No alleles are reported.
FBgn0262528	0	2	0	0	0	0	2.07787	0.579429			CG43082	LINK	This gene is referred to in FlyBase by the symbol Dmel\CG43082 (FBgn0262528). It is a protein_coding_gene from Dmel. It has one annotated transcript and one polypeptide. Gene sequence location is 3L:15661867..15662279. Its molecular function is described by: . It is involved in the biological process described with: . One allele is reported. No phenotypic data is available. No phenotypic class da…
FBgn0001983	0	2	0	0	0	0	2.07787	0.579429			wor	LINK	The gene worniu is referred to in FlyBase by the symbol Dmel\wor (CG4158, FBgn0001983). It is a protein_coding_gene from Dmel. It has one annotated transcript and one polypeptide. Gene sequence location is 2L:15423297..15425580. Its molecular function is described by: sequence-specific DNA binding; DNA-binding transcription factor activity, RNA polymerase II-specific; DNA-binding transcription fa…
FBgn0263037	0	2	0	0	0	0	2.07787	0.579429			CG43332	LINK	This gene is referred to in FlyBase by the symbol Dmel\CG43332 (FBgn0263037). It is a protein_coding_gene from Dmel. It has one annotated transcript and one polypeptide. Gene sequence location is 2L:14161144..14163222. Its molecular function is described by: . It is involved in the biological process described with: . No alleles are reported.
FBgn0036879	0	2	0	0	0	0	2.07787	0.579429			Cpr76Bb	LINK	The gene Cuticular protein 76Bb is referred to in FlyBase by the symbol Dmel\Cpr76Bb (CG9290, FBgn0036879). It is a protein_coding_gene from Dmel. It has one annotated transcript and one polypeptide. Gene sequence location is 3L:19519649..19520419. Its molecular function is described by: structural constituent of chitin-based larval cuticle; structural constituent of cuticle. It is involved in th…
FBgn0039087	0	3.044	3	1.003	1.102	0	2.0528	0.251512			Ugt303B2	LINK	The gene UDP-glycosyltransferase family 303 member B2 is referred to in FlyBase by the symbol Dmel\Ugt303B2 (CG10168, FBgn0039087). It is a protein_coding_gene from Dmel. It has one annotated transcript and one polypeptide. Gene sequence location is 3R:23536993..23538908. Its molecular function is described by: transferase activity, transferring hexosyl groups. The biological processes in which i…
FBgn0034956	1	1	1	0	0	1	2.0524	0.353764			CG4324	LINK	This gene is referred to in FlyBase by the symbol Dmel\CG4324 (FBgn0034956). It is a protein_coding_gene from Dmel. It has 2 annotated transcripts and 2 polypeptides (1 unique). Gene sequence location is 2R:24014917..24017198. Its molecular function is described by: transmembrane transporter activity. It is involved in the biological process described with: transmembrane transport. 5 alleles are …
FBgn0000606	0	4	0	0	0	1	2.04726	0.413961			eve	LINK	The gene even skipped is referred to in FlyBase by the symbol Dmel\eve (CG2328, FBgn0000606). It is a protein_coding_gene from Dmel. It has one annotated transcript and one polypeptide. Gene sequence location is 2R:9979319..9980795. Its molecular function is described by: DNA binding; DNA-binding transcription factor activity, RNA polymerase II-specific; RNA polymerase II cis-regulatory region se…
FBgn0263232	2.875	12.203	0	0	0	4.258	2.00922	0.166315	0.999974		Nxf3	LINK	The gene Nuclear export factor 3 is referred to in FlyBase by the symbol Dmel\Nxf3 (CG32135, FBgn0263232). It is a protein_coding_gene from Dmel. It has 2 annotated transcripts and 2 polypeptides (1 unique). Gene sequence location is 3L:13965203..13973067. Its molecular function is described by: RNA binding. It is involved in the biological process described with: poly(A)+ mRNA export from nucleu…
FBgn0263232	2.875	12.203	0	0	0	4.258	2.00922	0.166315	0.999974		Nxf3	LINK	The gene Nuclear export factor 3 is referred to in FlyBase by the symbol Dmel\Nxf3 (CG32135, FBgn0263232). It is a protein_coding_gene from Dmel. It has 2 annotated transcripts and 2 polypeptides (1 unique). Gene sequence location is 3L:13965203..13973067. Its molecular function is described by: RNA binding. It is involved in the biological process described with: poly(A)+ mRNA export from nucleu…
FBgn0263232	2.875	12.203	0	0	0	4.258	2.00922	0.166315	0.999974		Nxf3	LINK	The gene Nuclear export factor 3 is referred to in FlyBase by the symbol Dmel\Nxf3 (CG32135, FBgn0263232). It is a protein_coding_gene from Dmel. It has 2 annotated transcripts and 2 polypeptides (1 unique). Gene sequence location is 3L:13965203..13973067. Its molecular function is described by: RNA binding. It is involved in the biological process described with: poly(A)+ mRNA export from nucleu…
FBgn0053775	0	1	2	1	0	0	2.00655	0.39795			CG33775	LINK	This gene is referred to in FlyBase by the symbol Dmel\CG33775 (FBgn0053775). It is a protein_coding_gene from Dmel. It has one annotated transcript and one polypeptide. Gene sequence location is 2R:12564224..12564901. Its molecular function is described by: . It is involved in the biological process described with: . 2 alleles are reported. No phenotypic data is available. No phenotypic class da…
FBgn0032416	0	1	2	1	0	0	2.00655	0.39795			Gr33a	LINK	The gene Gustatory receptor 33a is referred to in FlyBase by the symbol Dmel\Gr33a (CG17213, FBgn0032416). It is a protein_coding_gene from Dmel. It has one annotated transcript and one polypeptide. Gene sequence location is 2L:12138008..12140392. Its molecular function is described by: taste receptor activity. It is involved in the biological process described with: sensory perception of taste; …
FBgn0053817	4.559	10.384	1.139	2.39	2.117	1.542	1.99906	0.0798094	0.999974		His2A:CG33817	LINK	The gene His2A:CG33817 is referred to in FlyBase by the symbol Dmel\His2A:CG33817 (CG33817, FBgn0053817). It is a protein_coding_gene from Dmel. It has one annotated transcript and one polypeptide. Gene sequence location is 2L:21457995..21458487. Its molecular function is described by: DNA binding; protein heterodimerization activity. It is involved in the biological process described with: chrom…
FBgn0053856	0	6.212	1.139	0	1.587	1.519	1.99073	0.270656			His2A:CG33856	LINK	The gene His2A:CG33856 is referred to in FlyBase by the symbol Dmel\His2A:CG33856 (CG33856, FBgn0053856). It is a protein_coding_gene from Dmel. It has one annotated transcript and one polypeptide. Gene sequence location is 2L:21523498..21523990. Its molecular function is described by: protein heterodimerization activity; DNA binding. It is involved in the biological process described with: chrom…
FBgn0053958	2	4	2	2	0	1	1.97333	0.177484	0.999974		CG33958	LINK	This gene is referred to in FlyBase by the symbol Dmel\CG33958 (FBgn0053958). It is a protein_coding_gene from Dmel. It has one annotated transcript and one polypeptide. Gene sequence location is 2R:18184382..18192851. Its molecular function is described by: guanylate cyclase activity; peptide receptor activity. It is involved in the biological process described with: cGMP biosynthetic process; s…
FBgn0052185	1	5	3	0	1	2	1.96627	0.169453	0.999974		edin	LINK	The gene elevated during infection is referred to in FlyBase by the symbol Dmel\edin (CG32185, FBgn0052185). It is a protein_coding_gene from Dmel. It has one annotated transcript and one polypeptide. Gene sequence location is 3L:17494880..17495300. Its molecular function is described by: . It is involved in the biological process described with: humoral immune response; defense response to Gram-…
FBgn0031283	4.317	0	9.677	7.875	0	0	1.92679	0.493022	0.999974		CG15880	LINK	This gene is referred to in FlyBase by the symbol Dmel\CG15880 (FBgn0031283). It is a protein_coding_gene from Dmel. It has one annotated transcript and one polypeptide. Gene sequence location is 2L:816994..817950. Its molecular function is unknown. It is involved in the biological process described with: GPI anchor biosynthetic process. One allele is reported. No phenotypic data is available. Th…
FBgn0036780	18	20.007	11	12	2	6	1.90518	0.00230881	0.355628		CG7330	LINK	This gene is referred to in FlyBase by the symbol Dmel\CG7330 (FBgn0036780). It is a protein_coding_gene from Dmel. It has 2 annotated transcripts and 2 polypeptides (1 unique). Gene sequence location is 3L:18148923..18153807. Its molecular function is unknown. The biological processes in which it is involved are not known. 8 alleles are reported. No phenotypic data is available. The phenotypic c…
FBgn0031775	3	2	2	2	0	1.037	1.90222	0.200616	0.999974		CG9150	LINK	This gene is referred to in FlyBase by the symbol Dmel\CG9150 (FBgn0031775). It is a protein_coding_gene from Dmel. It has one annotated transcript and one polypeptide. Gene sequence location is 2L:6067668..6068594. Its molecular function is described by: 17-beta-ketosteroid reductase activity; estradiol 17-beta-dehydrogenase activity; 17-beta-hydroxysteroid dehydrogenase (NADP+) activity; 3-keto…
FBgn0031775	3	2	2	2	0	1.037	1.90222	0.200616	0.999974		CG9150	LINK	This gene is referred to in FlyBase by the symbol Dmel\CG9150 (FBgn0031775). It is a protein_coding_gene from Dmel. It has one annotated transcript and one polypeptide. Gene sequence location is 2L:6067668..6068594. Its molecular function is described by: 17-beta-ketosteroid reductase activity; estradiol 17-beta-dehydrogenase activity; 17-beta-hydroxysteroid dehydrogenase (NADP+) activity; 3-keto…
FBgn0034770	1	2	0	0	1	0	1.89691	0.425762			Obp58d	LINK	The gene Odorant-binding protein 58d is referred to in FlyBase by the symbol Dmel\Obp58d (CG13519, FBgn0034770). It is a protein_coding_gene from Dmel. It has one annotated transcript and one polypeptide. Gene sequence location is 2R:22706934..22707772. Its molecular function is described by: odorant binding. It is involved in the biological process described with: sensory perception of chemical …
FBgn0262572	1	2	0	0	1	0	1.89691	0.425762			CG43112	LINK	This gene is referred to in FlyBase by the symbol Dmel\CG43112 (FBgn0262572). It is a protein_coding_gene from Dmel. It has one annotated transcript and one polypeptide. Gene sequence location is 2R:11249594..11249933. Its molecular function is described by: . It is involved in the biological process described with: . No alleles are reported.
FBgn0264899	1	2	0	0	0	1	1.89661	0.427878			CG44090	LINK	This gene is referred to in FlyBase by the symbol Dmel\CG44090 (FBgn0264899). It is a protein_coding_gene from Dmel. It has one annotated transcript and one polypeptide. Gene sequence location is 3R:17433991..17434430. Its molecular function is described by: . It is involved in the biological process described with: . No alleles are reported.
FBgn0031837	1	4	1	0	2	0	1.88357	0.292141			DIP-iota	LINK	The gene Dpr-interacting protein iota is referred to in FlyBase by the symbol Dmel\DIP-iota (CG11320, FBgn0031837). It is a protein_coding_gene from Dmel. It has one annotated transcript and one polypeptide. Gene sequence location is 2L:6617134..6621700. Its molecular function is unknown. It is involved in the biological process described with: synapse organization. 6 alleles are reported. No phe…
FBgn0038750	0	8	3	3	0	1	1.88267	0.185457	0.999974		CG4465	LINK	This gene is referred to in FlyBase by the symbol Dmel\CG4465 (FBgn0038750). It is a protein_coding_gene from Dmel. It has one annotated transcript and one polypeptide. Gene sequence location is 3R:19915868..19917839. Its molecular function is unknown. It is involved in the biological process described with: transmembrane transport. 6 alleles are reported. No phenotypic data is available. The phe…
FBgn0039848	0	2.004	1	0	1.003	0	1.8432	0.445068			Loxl1	LINK	The gene Lysyl oxidase-like 1 is referred to in FlyBase by the symbol Dmel\Loxl1 (CG11335, FBgn0039848). It is a protein_coding_gene from Dmel. It has one annotated transcript and one polypeptide. Gene sequence location is 3R:31458380..31459869. Its molecular function is described by: copper ion binding; scavenger receptor activity; protein-lysine 6-oxidase activity. It is involved in the biologi…
FBgn0266050	0	2	1	0	0	1	1.84258	0.447354			CG44815	LINK	This gene is referred to in FlyBase by the symbol Dmel\CG44815 (FBgn0266050). It is a protein_coding_gene from Dmel. It has one annotated transcript and one polypeptide. Gene sequence location is X:9445815..9446212. Its molecular function is described by: . It is involved in the biological process described with: . No alleles are reported.
FBgn0035858	0	2	1	1	0	0	1.84059	0.454752			CG13674	LINK	This gene is referred to in FlyBase by the symbol Dmel\CG13674 (FBgn0035858). It is a protein_coding_gene from Dmel. It has 2 annotated transcripts and 2 polypeptides (1 unique). Gene sequence location is 3L:8218232..8218983. Its molecular function is unknown. The biological processes in which it is involved are not known. 3 alleles are reported. The phenotype of these alleles manifest in: tricho…
FBgn0053813	0	8.254	1.091	1.335	0	2.248	1.82944	0.258022	0.999974		His1:CG33813	LINK	The gene His1:CG33813 is referred to in FlyBase by the symbol Dmel\His1:CG33813 (CG33813, FBgn0053813). It is a protein_coding_gene from Dmel. It has one annotated transcript and one polypeptide. Gene sequence location is 2L:21451052..21452074. Its molecular function is described by: chromatin DNA binding. It is involved in the biological process described with: nucleosome assembly. No alleles ar…
FBgn0266437	5	2	1	4	0	0	1.81646	0.216593	0.999974		CG45067	LINK	This gene is referred to in FlyBase by the symbol Dmel\CG45067 (FBgn0266437). It is a protein_coding_gene from Dmel. It has one annotated transcript and one polypeptide. Gene sequence location is 3L:3111233..3114467. Its molecular function is described by: . It is involved in the biological process described with: . 3 alleles are reported. The phenotype of these alleles manifest in: mesothoracic …
FBgn0031854	2	2.008	1	0	2	0	1.78424	0.320417			TTLL3A	LINK	The gene Tubulin tyrosine ligase-like 3A is referred to in FlyBase by the symbol Dmel\TTLL3A (CG11323, FBgn0031854). It is a protein_coding_gene from Dmel. It has one annotated transcript and one polypeptide. Gene sequence location is 2L:6736364..6740188. Its molecular function is described by: protein-glycine ligase activity; protein-glycine ligase activity, elongating; protein-glycine ligase ac…
FBgn0031375	3	6	5	3	0.999	3	1.783	0.101633	0.999974		erm	LINK	The gene earmuff is referred to in FlyBase by the symbol Dmel\erm (CG31670, FBgn0031375). It is a protein_coding_gene from Dmel. It has 4 annotated transcripts and 4 polypeptides (all unique). Gene sequence location is 2L:1950239..1970362. Its molecular function is described by: sequence-specific DNA binding; DNA-binding transcription activator activity, RNA polymerase II-specific; RNA polymerase…
FBgn0263109	2	1	1	2	0	0	1.77522	0.361035			CG43366	LINK	This gene is referred to in FlyBase by the symbol Dmel\CG43366 (FBgn0263109). It is a protein_coding_gene from Dmel. It has one annotated transcript and one polypeptide. Gene sequence location is 2R:5893895..5931363. Its molecular function is described by: serine-type endopeptidase inhibitor activity. It is involved in the biological process described with: negative regulation of endopeptidase ac…
FBgn0037430	0	5	5	1	1	2.003	1.75565	0.191581	0.999974		Osi20	LINK	The gene Osiris 20 is referred to in FlyBase by the symbol Dmel\Osi20 (CG15188, FBgn0037430). It is a protein_coding_gene from Dmel. It has one annotated transcript and one polypeptide. Gene sequence location is 3R:6340095..6341424. Its molecular function is described by: . It is involved in the biological process described with: . 4 alleles are reported. The phenotype of these alleles manifest i…
FBgn0038365	8.368	9.862	6.232	3	5.438	2	1.73622	0.0364774	0.999974		CG9593	LINK	This gene is referred to in FlyBase by the symbol Dmel\CG9593 (FBgn0038365). It is a protein_coding_gene from Dmel. It has one annotated transcript and one polypeptide. Gene sequence location is 3R:15802275..15803653. Its molecular function is described by: transmembrane receptor protein tyrosine kinase activator activity. It is involved in the biological process described with: negative regulati…
FBgn0036139	1	0	3	1	1	0	1.72701	0.366184			CG6216	LINK	This gene is referred to in FlyBase by the symbol Dmel\CG6216 (FBgn0036139). It is a protein_coding_gene from Dmel. It has one annotated transcript and one polypeptide. Gene sequence location is 3L:11149578..11150785. Its molecular function is described by: . It is involved in the biological process described with: . One allele is reported. No phenotypic data is available. The phenotypic class of…
FBgn0025627	1	0	3	1	1	0	1.72701	0.366184			CG4194	LINK	This gene is referred to in FlyBase by the symbol Dmel\CG4194 (FBgn0025627). It is a protein_coding_gene from Dmel. It has one annotated transcript and one polypeptide. Gene sequence location is X:2068592..2069688. Its molecular function is unknown. The biological processes in which it is involved are not known. 2 alleles are reported. No phenotypic data is available. No phenotypic class data is …
FBgn0038051	10.925	21.781	30.713	19.949	0	10.35	1.72432	0.0088665	0.879473		CG17207	LINK	This gene is referred to in FlyBase by the symbol Dmel\CG17207 (FBgn0038051). It is a protein_coding_gene from Dmel. It has one annotated transcript and one polypeptide. Gene sequence location is 3R:12437817..12439139. Its molecular function is described by: . It is involved in the biological process described with: . One allele is reported. No phenotypic data is available. No phenotypic class da…
FBgn0033095	67.66	52.952	62.483	88.517	0	12.548	1.72056	0.28463	0.999974		chk	LINK	The gene chaski is referred to in FlyBase by the symbol Dmel\chk (CG3409, FBgn0033095). It is a protein_coding_gene from Dmel. It has 3 annotated transcripts and 3 polypeptides (1 unique). Gene sequence location is 2R:6699695..6715892. Its molecular function is described by: monocarboxylic acid transmembrane transporter activity. It is involved in the biological process described with: monocarbox…
FBgn0030495	2	3	0	0	1	1	1.71257	0.353032			CG11816	LINK	This gene is referred to in FlyBase by the symbol Dmel\CG11816 (FBgn0030495). It is a protein_coding_gene from Dmel. It has 4 annotated transcripts and 4 polypeptides (2 unique). Gene sequence location is X:13552559..13555800. Its molecular function is described by: . It is involved in the biological process described with: . 3 alleles are reported. No phenotypic data is available. The phenotypic…
FBgn0053272	2	0	0	1	0	0	1.70831	0.518773			CG33272	LINK	This gene is referred to in FlyBase by the symbol Dmel\CG33272 (FBgn0053272). It is a protein_coding_gene from Dmel. It has one annotated transcript and one polypeptide. Gene sequence location is 3L:11510323..11510589. Its molecular function is described by: . It is involved in the biological process described with: . 3 alleles are reported. No phenotypic data is available. No phenotypic class da…
FBgn0037133	2	0	0	1	0	0	1.70831	0.518773			CG7370	LINK	This gene is referred to in FlyBase by the symbol Dmel\CG7370 (FBgn0037133). It is a protein_coding_gene from Dmel. It has one annotated transcript and one polypeptide. Gene sequence location is 3L:21769815..21771321. Its molecular function is unknown. The biological processes in which it is involved are not known. 13 alleles are reported. No phenotypic data is available. The phenotypic classes o…
FBgn0032228	2	0	0	0	0	1	1.70451	0.513033			CG5367	LINK	This gene is referred to in FlyBase by the symbol Dmel\CG5367 (FBgn0032228). It is a protein_coding_gene from Dmel. It has one annotated transcript and one polypeptide. Gene sequence location is 2L:10354743..10356597. Its molecular function is described by: cysteine-type endopeptidase activity. It is involved in the biological process described with: immune response; proteolysis involved in cellu…
FBgn0030583	1.158	2.578	3.962	3.596	0	0	1.70245	0.303767	0.999974		CG14410	LINK	This gene is referred to in FlyBase by the symbol Dmel\CG14410 (FBgn0030583). It is a protein_coding_gene from Dmel. It has one annotated transcript and one polypeptide. Gene sequence location is X:14836725..14837330. Its molecular function is unknown. The biological processes in which it is involved are not known. 4 alleles are reported. The phenotype of these alleles manifest in: trichogen cell…
FBgn0033708	6	0	1	3	1.823	0	1.70185	0.262354	0.999974		CG8850	LINK	This gene is referred to in FlyBase by the symbol Dmel\CG8850 (FBgn0033708). It is a protein_coding_gene from Dmel. It has 2 annotated transcripts and 2 polypeptides (all unique). Gene sequence location is 2R:12298747..12302240. Its molecular function is described by: neurotransmitter transmembrane transporter activity; neurotransmitter:sodium symporter activity; L-amino acid transmembrane transp…
FBgn0260390	6.022	3.928	7.083	4.183	0	4.705	1.69827	0.0916794	0.999974		CG42516	LINK	This gene is referred to in FlyBase by the symbol Dmel\CG42516 (FBgn0260390). It is a protein_coding_gene from Dmel. It has 3 annotated transcripts and 3 polypeptides (1 unique). Gene sequence location is 2R:8129354..8131323. Its molecular function is unknown. It is involved in the biological process described with: transcription by RNA polymerase III. One allele is reported. No phenotypic data i…
FBgn0034095	3	5	3	3	2.252	0	1.69309	0.158919	0.999974		CG15701	LINK	This gene is referred to in FlyBase by the symbol Dmel\CG15701 (FBgn0034095). It is a protein_coding_gene from Dmel. It has one annotated transcript and one polypeptide. Gene sequence location is 2R:16230198..16234087. Its molecular function is described by: dynein heavy chain binding; dynein light chain binding. It is involved in the biological process described with: microtubule-based movement;…
FBgn0286833	1.07	3.295	1.36	0	1.686	1.122	1.68916	0.345787			CG46387	LINK	This gene is referred to in FlyBase by the symbol Dmel\CG46387 (FBgn0286833). It is a protein_coding_gene from Dmel. It has one annotated transcript and one polypeptide. Gene sequence location is 3L:9898626..9899387. Its molecular function is unknown. The biological processes in which it is involved are not known. No alleles are reported.
FBgn0052855	1.056	3	1	0	1	1	1.68916	0.345787			CG32855	LINK	This gene is referred to in FlyBase by the symbol Dmel\CG32855 (FBgn0052855). It is a protein_coding_gene from Dmel. It has one annotated transcript and one polypeptide. Gene sequence location is 3R:16078980..16080992. Its molecular function is described by: . It is involved in the biological process described with: . 2 alleles are reported. No phenotypic data is available. The phenotypic class o…
FBgn0033855	2	3.007	2	0	1	2.004	1.68678	0.254482	0.999974		link	LINK	The gene link is referred to in FlyBase by the symbol Dmel\link (CG13333, FBgn0033855). It is a protein_coding_gene from Dmel. It has one annotated transcript and one polypeptide. Gene sequence location is 2R:13555949..13557342. Its molecular function is unknown. The biological processes in which it is involved are not known. 4 alleles are reported. The phenotypes of these alleles manifest in: la…
FBgn0038188	2	4	3	1	1	2	1.66668	0.194909	0.999974		Art9	LINK	The gene Arginine methyltransferase 9 is referred to in FlyBase by the symbol Dmel\Art9 (CG9929, FBgn0038188). It is a protein_coding_gene from Dmel. It has one annotated transcript and one polypeptide. Gene sequence location is 3R:13942238..13943460. Its molecular function is described by: protein-arginine omega-N monomethyltransferase activity. It is involved in the biological process described…
FBgn0053896	2.377	5.182	2.31	2.588	1.893	1.393	1.66064	0.204449	0.999974		His2B:CG33896	LINK	The gene His2B:CG33896 is referred to in FlyBase by the symbol Dmel\His2B:CG33896 (CG33896, FBgn0053896). It is a protein_coding_gene from Dmel. It has one annotated transcript and one polypeptide. Gene sequence location is 2L:21467375..21467969. Its molecular function is described by: protein heterodimerization activity; DNA binding. It is involved in the biological process described with: chrom…
FBgn0034005	0	3.065	2	0	1	1	1.64979	0.37675			ItgaPS4	LINK	The gene Integrin alphaPS4 subunit is referred to in FlyBase by the symbol Dmel\ItgaPS4 (CG16827, FBgn0034005). It is a protein_coding_gene from Dmel. It has one annotated transcript and one polypeptide. Gene sequence location is 2R:15258761..15262873. Its molecular function is described by: protein heterodimerization activity. It is involved in the biological process described with: cell-matrix …
FBgn0053499	2.47	1.477	1.209	1.243	1.405	0	1.64795	0.372021			Sdic4	LINK	The gene Sperm-specific dynein intermediate chain 4 is referred to in FlyBase by the symbol Dmel\Sdic4 (CG33499, FBgn0053499). It is a protein_coding_gene from Dmel. It has one annotated transcript and one polypeptide. Gene sequence location is X:20220666..20225020. Its molecular function is described by: . It is involved in the biological process described with: microtubule-based movement. 3 all…
FBgn0039838	0	3	0	0	1	0	1.64314	0.541188			CAH6	LINK	The gene Carbonic anhydrase 6 is referred to in FlyBase by the symbol Dmel\CAH6 (CG3669, FBgn0039838). It is a protein_coding_gene from Dmel. It has one annotated transcript and one polypeptide. Gene sequence location is 3R:31257599..31260049. Its molecular function is described by: hydro-lyase activity; zinc ion binding; carbonate dehydratase activity. It is involved in the biological process de…
FBgn0014076	0	3.694	0	0	1	0	1.64314	0.541188			Vm32E	LINK	The gene Vitelline membrane 32E is referred to in FlyBase by the symbol Dmel\Vm32E (CG16874, FBgn0014076). It is a protein_coding_gene from Dmel. It has 2 annotated transcripts and 2 polypeptides (1 unique). Gene sequence location is 2L:11171167..11171665. Its molecular function is described by: structural constituent of vitelline membrane. It is involved in the biological process described with:…
FBgn0037399	0	3.022	0	0	0	1	1.64159	0.544013			Or83c	LINK	The gene Odorant receptor 83c is referred to in FlyBase by the symbol Dmel\Or83c (CG15581, FBgn0037399). It is a protein_coding_gene from Dmel. It has one annotated transcript and one polypeptide. Gene sequence location is 3R:6076804..6078283. Its molecular function is described by: odorant binding; olfactory receptor activity. It is involved in the biological process described with: detection of…
FBgn0003382	1	1	2	1	0	1	1.64037	0.378691			sha	LINK	The gene shavenoid is referred to in FlyBase by the symbol Dmel\sha (CG13209, FBgn0003382). It is a protein_coding_gene from Dmel. It has 3 annotated transcripts and 3 polypeptides (all unique). Gene sequence location is 2R:11324314..11336463. Its molecular function is described by: . It is involved in the biological process described with: cuticle pattern formation; imaginal disc-derived wing ha…
FBgn0020765	2	4	5	1	3	1	1.63739	0.16345	0.999974		Acp65Aa	LINK	The gene Adult cuticle protein 65Aa is referred to in FlyBase by the symbol Dmel\Acp65Aa (CG10297, FBgn0020765). It is a protein_coding_gene from Dmel. It has one annotated transcript and one polypeptide. Gene sequence location is 3L:6152050..6152745. Its molecular function is described by: structural constituent of cuticle; structural constituent of chitin-based larval cuticle. It is involved in…
FBgn0264714	0	3	0	1	0	0	1.63674	0.553116			CG43982	LINK	This gene is referred to in FlyBase by the symbol Dmel\CG43982 (FBgn0264714). It is a protein_coding_gene from Dmel. It has one annotated transcript and one polypeptide. Gene sequence location is 2R:21763995..21764695. Its molecular function is described by: . It is involved in the biological process described with: . No alleles are reported.
FBgn0053349	0	3.046	0	1	0	0	1.63674	0.553116			ppk25	LINK	The gene pickpocket 25 is referred to in FlyBase by the symbol Dmel\ppk25 (CG33349, FBgn0053349). It is a protein_coding_gene from Dmel. It has one annotated transcript and one polypeptide. Gene sequence location is 2R:6950385..6952158. Its molecular function is described by: ligand-gated sodium channel activity; sodium channel activity; protein binding. It is involved in the biological process d…
FBgn0287212	1	0	1.001	1	0	0	1.63198	0.520691			CG46442	LINK	This gene is referred to in FlyBase by the symbol Dmel\CG46442 (FBgn0287212). It is a protein_coding_gene from Dmel. It has one annotated transcript and one polypeptide. Gene sequence location is 2R:22425576..22425981. Its molecular function is unknown. The biological processes in which it is involved are not known. No alleles are reported.
FBgn0028946	1	0	1	1	0	0	1.63198	0.520691			Or35a	LINK	The gene Odorant receptor 35a is referred to in FlyBase by the symbol Dmel\Or35a (CG17868, FBgn0028946). It is a protein_coding_gene from Dmel. It has one annotated transcript and one polypeptide. Gene sequence location is 2L:15622068..15623558. Its molecular function is described by: odorant binding; olfactory receptor activity. It is involved in the biological process described with: detection …
FBgn0036226	1	0	1	1	0	0	1.63198	0.520691			CG7252	LINK	This gene is referred to in FlyBase by the symbol Dmel\CG7252 (FBgn0036226). It is a protein_coding_gene from Dmel. It has one annotated transcript and one polypeptide. Gene sequence location is 3L:11947675..11949248. Its molecular function is described by: chitin binding. It is involved in the biological process described with: chitin metabolic process. 4 alleles are reported. No phenotypic data…
FBgn0031031	1	0	1	0	0	1	1.62887	0.515051			CG14218	LINK	This gene is referred to in FlyBase by the symbol Dmel\CG14218 (FBgn0031031). It is a protein_coding_gene from Dmel. It has 2 annotated transcripts and 2 polypeptides (all unique). Gene sequence location is X:19580350..19581981. Its molecular function is unknown. The biological processes in which it is involved are not known. 3 alleles are reported. No phenotypic data is available. The phenotypic…
FBgn0038645	1	0	1	0	0	1	1.62887	0.515051			CG7714	LINK	This gene is referred to in FlyBase by the symbol Dmel\CG7714 (FBgn0038645). It is a protein_coding_gene from Dmel. It has one annotated transcript and one polypeptide. Gene sequence location is 3R:18725399..18726434. Its molecular function is described by: chitin binding. It is involved in the biological process described with: chitin metabolic process. 5 alleles are reported. The phenotypes of …
FBgn0039428	1	0	1	0	0	1	1.62887	0.515051			CG14237	LINK	This gene is referred to in FlyBase by the symbol Dmel\CG14237 (FBgn0039428). It is a protein_coding_gene from Dmel. It has one annotated transcript and one polypeptide. Gene sequence location is 3R:26456877..26457242. Its molecular function is unknown. The biological processes in which it is involved are not known. 2 alleles are reported. No phenotypic data is available. No phenotypic class data…
FBgn0039069	1.01	2	3	2	0	1	1.62812	0.300658	0.999974		CG6763	LINK	This gene is referred to in FlyBase by the symbol Dmel\CG6763 (FBgn0039069). It is a protein_coding_gene from Dmel. It has 2 annotated transcripts and 2 polypeptides (1 unique). Gene sequence location is 3R:23284002..23286041. Its molecular function is described by: zinc ion binding; metalloendopeptidase activity. It is involved in the biological process described with: proteolysis. 4 alleles are…
FBgn0020639	1	0	1	0	1	0	1.62789	0.51332			Lcp65Af	LINK	The gene Lcp65Af is referred to in FlyBase by the symbol Dmel\Lcp65Af (CG10533, FBgn0020639). It is a protein_coding_gene from Dmel. It has one annotated transcript and one polypeptide. Gene sequence location is 3L:6136215..6136791. Its molecular function is described by: structural constituent of cuticle; structural constituent of chitin-based larval cuticle. It is involved in the biological pro…
FBgn0033866	1	0	1	0	1	0	1.62789	0.51332			CG6280	LINK	This gene is referred to in FlyBase by the symbol Dmel\CG6280 (FBgn0033866). It is a protein_coding_gene from Dmel. It has one annotated transcript and one polypeptide. Gene sequence location is 2R:13753964..13758971. Its molecular function is described by: . It is involved in the biological process described with: . 4 alleles are reported. No phenotypic data is available. The phenotypic class of…
FBgn0032024	2	6	5	3	3	0	1.62683	0.147752	0.999974		CG14273	LINK	This gene is referred to in FlyBase by the symbol Dmel\CG14273 (FBgn0032024). It is a protein_coding_gene from Dmel. It has one annotated transcript and one polypeptide. Gene sequence location is 2L:8342695..8344378. Its molecular function is unknown. The biological processes in which it is involved are not known. 2 alleles are reported. No phenotypic data is available. The phenotypic class of al…
FBgn0027544	16.372	22.636	46.533	27.968	0	18.014	1.6257	0.2283	0.999974		CG2217	LINK	This gene is referred to in FlyBase by the symbol Dmel\CG2217 (FBgn0027544). It is a protein_coding_gene from Dmel. It has 4 annotated transcripts and 4 polypeptides (1 unique). Gene sequence location is 3R:30418767..30422971. Its molecular function is unknown. The biological processes in which it is involved are not known. 7 alleles are reported. No phenotypic data is available. The phenotypic c…
FBgn0052598	1.414	27.176	11.543	1.809	9.794	5.328	1.62279	0.053398	0.999974		betaNACtes6	LINK	The gene Nascent-associated complex beta-subunit-like, testis 6 is referred to in FlyBase by the symbol Dmel\betaNACtes6 (CG32598, FBgn0052598). It is a protein_coding_gene from Dmel. It has one annotated transcript and one polypeptide. Gene sequence location is X:14316130..14317150. Its molecular function is described by: . It is involved in the biological process described with: . 2 alleles are…
FBgn0033836	6.336	16.479	16.466	13.782	0	6.27	1.60862	0.0295073	0.999974		CG18278	LINK	This gene is referred to in FlyBase by the symbol Dmel\CG18278 (FBgn0033836). It is a protein_coding_gene from Dmel. It has one annotated transcript and one polypeptide. Gene sequence location is 2R:13408042..13409887. Its molecular function is described by: N-acetylglucosamine-6-sulfatase activity; glycosaminoglycan binding. It is involved in the biological process described with: glycosaminogly…
FBgn0033836	6.336	16.479	16.466	13.782	0	6.27	1.60862	0.0295073	0.999974		CG18278	LINK	This gene is referred to in FlyBase by the symbol Dmel\CG18278 (FBgn0033836). It is a protein_coding_gene from Dmel. It has one annotated transcript and one polypeptide. Gene sequence location is 2R:13408042..13409887. Its molecular function is described by: N-acetylglucosamine-6-sulfatase activity; glycosaminoglycan binding. It is involved in the biological process described with: glycosaminogly…
FBgn0083981	6	13	2	1	3	5	1.60708	0.0854125	0.999974		RunxA	LINK	The gene Runt related A is referred to in FlyBase by the symbol Dmel\RunxA (CG34145, FBgn0083981). It is a protein_coding_gene from Dmel. It has 3 annotated transcripts and 3 polypeptides (all unique). Gene sequence location is X:20590252..20623773. Its molecular function is described by: ATP binding; DNA-binding transcription factor activity; DNA binding. It is involved in the biological process…
FBgn0045495	2	3	3	2	0	2	1.58959	0.24141	0.999974		Gr28b	LINK	The gene Gustatory receptor 28b is referred to in FlyBase by the symbol Dmel\Gr28b (CG13788, FBgn0045495). It is a protein_coding_gene from Dmel. It has 5 annotated transcripts and 5 polypeptides (all unique). Gene sequence location is 2L:7454826..7462247. Its molecular function is described by: taste receptor activity. It is involved in the biological process described with 8 unique terms, many …
FBgn0029924	2	5	3	4	0	1	1.58822	0.212191	0.999974		CG4586	LINK	This gene is referred to in FlyBase by the symbol Dmel\CG4586 (FBgn0029924). It is a protein_coding_gene from Dmel. It has one annotated transcript and one polypeptide. Gene sequence location is X:6969918..6972265. Its molecular function is described by: FAD binding; acyl-CoA oxidase activity; flavin adenine dinucleotide binding; fatty acid binding. It is involved in the biological process descri…
FBgn0029924	2	5	3	4	0	1	1.58822	0.212191	0.999974		CG4586	LINK	This gene is referred to in FlyBase by the symbol Dmel\CG4586 (FBgn0029924). It is a protein_coding_gene from Dmel. It has one annotated transcript and one polypeptide. Gene sequence location is X:6969918..6972265. Its molecular function is described by: FAD binding; acyl-CoA oxidase activity; flavin adenine dinucleotide binding; fatty acid binding. It is involved in the biological process descri…
FBgn0029924	2	5	3	4	0	1	1.58822	0.212191	0.999974		CG4586	LINK	This gene is referred to in FlyBase by the symbol Dmel\CG4586 (FBgn0029924). It is a protein_coding_gene from Dmel. It has one annotated transcript and one polypeptide. Gene sequence location is X:6969918..6972265. Its molecular function is described by: FAD binding; acyl-CoA oxidase activity; flavin adenine dinucleotide binding; fatty acid binding. It is involved in the biological process descri…
FBgn0029924	2	5	3	4	0	1	1.58822	0.212191	0.999974		CG4586	LINK	This gene is referred to in FlyBase by the symbol Dmel\CG4586 (FBgn0029924). It is a protein_coding_gene from Dmel. It has one annotated transcript and one polypeptide. Gene sequence location is X:6969918..6972265. Its molecular function is described by: FAD binding; acyl-CoA oxidase activity; flavin adenine dinucleotide binding; fatty acid binding. It is involved in the biological process descri…
FBgn0029924	2	5	3	4	0	1	1.58822	0.212191	0.999974		CG4586	LINK	This gene is referred to in FlyBase by the symbol Dmel\CG4586 (FBgn0029924). It is a protein_coding_gene from Dmel. It has one annotated transcript and one polypeptide. Gene sequence location is X:6969918..6972265. Its molecular function is described by: FAD binding; acyl-CoA oxidase activity; flavin adenine dinucleotide binding; fatty acid binding. It is involved in the biological process descri…
FBgn0029924	2	5	3	4	0	1	1.58822	0.212191	0.999974		CG4586	LINK	This gene is referred to in FlyBase by the symbol Dmel\CG4586 (FBgn0029924). It is a protein_coding_gene from Dmel. It has one annotated transcript and one polypeptide. Gene sequence location is X:6969918..6972265. Its molecular function is described by: FAD binding; acyl-CoA oxidase activity; flavin adenine dinucleotide binding; fatty acid binding. It is involved in the biological process descri…
FBgn0259223	1	4	0	0	1	1	1.57563	0.410059			CG42323	LINK	This gene is referred to in FlyBase by the symbol Dmel\CG42323 (FBgn0259223). It is a protein_coding_gene from Dmel. It has 2 annotated transcripts and 2 polypeptides (all unique). Gene sequence location is X:18422413..18427001. Its molecular function is described by: . It is involved in the biological process described with: . 5 alleles are reported. The phenotypes of these alleles manifest in: …
FBgn0053909	0	0	2	0	0	1	1.57199	0.559011			His4:CG33909	LINK	The gene His4:CG33909 is referred to in FlyBase by the symbol Dmel\His4:CG33909 (CG33909, FBgn0053909). It is a protein_coding_gene from Dmel. It has one annotated transcript and one polypeptide. Gene sequence location is 2L:21419531..21419943. Its molecular function is described by: protein heterodimerization activity; DNA binding; histone binding. It is involved in the biological process descri…
FBgn0050088	0	0	2	0	0	1.227	1.57199	0.559011			CG30088	LINK	This gene is referred to in FlyBase by the symbol Dmel\CG30088 (FBgn0050088). It is a protein_coding_gene from Dmel. It has one annotated transcript and one polypeptide. Gene sequence location is 2R:15691113..15692216. Its molecular function is described by: serine-type endopeptidase activity. It is involved in the biological process described with: proteolysis. 4 alleles are reported. No phenoty…
FBgn0030904	0	0	2	0	1	0	1.57139	0.556975			upd2	LINK	The gene unpaired 2 is referred to in FlyBase by the symbol Dmel\upd2 (CG5988, FBgn0030904). It is a protein_coding_gene from Dmel. It has one annotated transcript and one polypeptide. Gene sequence location is X:18240654..18243284. Its molecular function is described by: cytokine activity. It is involved in the biological process described with 8 unique terms, many of which group under: developm…
FBgn0034994	0	0	2	0	1	0	1.57139	0.556975			Ir60a	LINK	The gene Ionotropic receptor 60a is referred to in FlyBase by the symbol Dmel\Ir60a (CG13576, FBgn0034994). It is a protein_coding_gene from Dmel. It has one annotated transcript and one polypeptide. Gene sequence location is 2R:24249055..24251303. Its molecular function is described by: ligand-gated ion channel activity. It is involved in the biological process described with: detection of chemi…
FBgn0037175	0	0	2	0	1	0	1.57139	0.556975			CG14455	LINK	This gene is referred to in FlyBase by the symbol Dmel\CG14455 (FBgn0037175). It is a protein_coding_gene from Dmel. It has one annotated transcript and one polypeptide. Gene sequence location is 3L:22686360..22687087. Its molecular function is unknown. The biological processes in which it is involved are not known. 3 alleles are reported. No phenotypic data is available. The phenotypic classes o…
FBgn0261266	2	3.118	1.006	2	1	0	1.55999	0.323201	0.999974		zuc	LINK	The gene zucchini is referred to in FlyBase by the symbol Dmel\zuc (CG12314, FBgn0261266). It is a protein_coding_gene from Dmel. It has one annotated transcript and one polypeptide. Gene sequence location is 2L:11988735..11989882. Its molecular function is described by: cardiolipin hydrolase activity; endoribonuclease activity, producing 5'-phosphomonoesters. It is involved in the biological pro…
FBgn0015271	7	8.123	7	4	5	2.026	1.55521	0.0576641	0.999974		Orc5	LINK	The gene Origin recognition complex subunit 5 is referred to in FlyBase by the symbol Dmel\Orc5 (CG7833, FBgn0015271). It is a protein_coding_gene from Dmel. It has one annotated transcript and one polypeptide. Gene sequence location is 2L:13829837..13831576. Its molecular function is described by: DNA replication origin binding. It is involved in the biological process described with: DNA-depend…
FBgn0038523	2	2	0	1	1	0	1.54351	0.427506			Sgs5bis	LINK	This gene is referred to in FlyBase by the symbol Dmel\Sgs5bis (CG7587, FBgn0038523). It is a protein_coding_gene from Dmel. It has one annotated transcript and one polypeptide. Gene sequence location is 3R:17594386..17595057. Its molecular function is unknown. It is involved in the biological process described with: puparial adhesion. 3 alleles are reported. No phenotypic data is available. The …
FBgn0030492	0	4	1	0	1	1	1.54148	0.423517			CG15754	LINK	This gene is referred to in FlyBase by the symbol Dmel\CG15754 (FBgn0030492). It is a protein_coding_gene from Dmel. It has one annotated transcript and one polypeptide. Gene sequence location is X:13528006..13529280. Its molecular function is described by: structural constituent of cuticle. The biological processes in which it is involved are not known. 3 alleles are reported. No phenotypic data…
FBgn0039664	84.269	33.217	92.28	78.807	30.002	18.803	1.5361	0.0509539	0.999974		CG2006	LINK	This gene is referred to in FlyBase by the symbol Dmel\CG2006 (FBgn0039664). It is a protein_coding_gene from Dmel. It has 2 annotated transcripts and 2 polypeptides (1 unique). Gene sequence location is 3R:29489468..29491383. Its molecular function is unknown. The biological processes in which it is involved are not known. 6 alleles are reported. No phenotypic data is available. No phenotypic cl…
FBgn0053664	7.17	9.742	6.052	10.118	2.185	0	1.53396	0.0888954	0.999974		CG33664	LINK	This gene is referred to in FlyBase by the symbol Dmel\CG33664 (FBgn0053664). It is a protein_coding_gene from Dmel. It has one annotated transcript and one polypeptide. Gene sequence location is X:6384220..6384899. Its molecular function is described by: . It is involved in the biological process described with: . No alleles are reported. Summary of modENCODE Temporal Expression Profile: Tempora…
FBgn0028740	1	2.068	1.069	1.035	0	1.028	1.53309	0.418609			CG6362	LINK	This gene is referred to in FlyBase by the symbol Dmel\CG6362 (FBgn0028740). It is a protein_coding_gene from Dmel. It has one annotated transcript and one polypeptide. Gene sequence location is 2R:17770405..17772552. Its molecular function is described by: . It is involved in the biological process described with: . 4 alleles are reported. No phenotypic data is available. The phenotypic class of…
FBgn0052188	0	0	1	0	0	0	1.53129	0.707309			CG32188	LINK	This gene is referred to in FlyBase by the symbol Dmel\CG32188 (FBgn0052188). It is a protein_coding_gene from Dmel. It has one annotated transcript and one polypeptide. Gene sequence location is 3L:17833277..17833625. Its molecular function is described by: . It is involved in the biological process described with: . One allele is reported. No phenotypic data is available. No phenotypic class da…
FBgn0040699	0	0	1	0	0	0	1.53129	0.707309			CG15024	LINK	This gene is referred to in FlyBase by the symbol Dmel\CG15024 (FBgn0040699). It is a protein_coding_gene from Dmel. It has one annotated transcript and one polypeptide. Gene sequence location is 3L:4462974..4463823. Its molecular function is unknown. The biological processes in which it is involved are not known. 2 alleles are reported. No phenotypic data is available. The phenotypic class of al…
FBgn0286893	0	0	1	0	0	0	1.53129	0.707309			CG46412	LINK	This gene is referred to in FlyBase by the symbol Dmel\CG46412 (FBgn0286893). It is a protein_coding_gene from Dmel. It has one annotated transcript and one polypeptide. Gene sequence location is 3L:11563587..11564072. Its molecular function is unknown. The biological processes in which it is involved are not known. No alleles are reported.
FBgn0265668	0	0	1	0	0	0	1.53129	0.707309			CG44475	LINK	This gene is referred to in FlyBase by the symbol Dmel\CG44475 (FBgn0265668). It is a protein_coding_gene from Dmel. It has one annotated transcript and one polypeptide. Gene sequence location is 2L:15882783..15883190. Its molecular function is described by: . It is involved in the biological process described with: . No alleles are reported.
FBgn0264832	0	0	1	0	0	0	1.53129	0.707309			CG44040	LINK	This gene is referred to in FlyBase by the symbol Dmel\CG44040 (FBgn0264832). It is a protein_coding_gene from Dmel. It has one annotated transcript and one polypeptide. Gene sequence location is 3R:15320378..15320691. Its molecular function is described by: . It is involved in the biological process described with: . No alleles are reported.
FBgn0002926	0	0	1	0	0	0	1.53129	0.707309			ndl	LINK	The gene nudel is referred to in FlyBase by the symbol Dmel\ndl (CG10129, FBgn0002926). It is a protein_coding_gene from Dmel. It has one annotated transcript and one polypeptide. Gene sequence location is 3L:6593938..6603366. Its molecular function is described by: serine-type endopeptidase activity. It is involved in the biological process described with 9 unique terms, many of which group unde…
FBgn0036782	0	0	1	0	0	0	1.53129	0.707309			CG7320	LINK	This gene is referred to in FlyBase by the symbol Dmel\CG7320 (FBgn0036782). It is a protein_coding_gene from Dmel. It has one annotated transcript and one polypeptide. Gene sequence location is 3L:18201494..18203637. Its molecular function is unknown. The biological processes in which it is involved are not known. 2 alleles are reported. No phenotypic data is available. No phenotypic class data …
FBgn0053885	0	0	1	0	0	0	1.53129	0.707309			His4:CG33885	LINK	The gene His4:CG33885 is referred to in FlyBase by the symbol Dmel\His4:CG33885 (CG33885, FBgn0053885). It is a protein_coding_gene from Dmel. It has one annotated transcript and one polypeptide. Gene sequence location is 2L:21494279..21494691. Its molecular function is described by: DNA binding; histone binding; protein heterodimerization activity. It is involved in the biological process descri…
FBgn0053700	0	0	1	0	0	0	1.53129	0.707309			CG33700	LINK	This gene is referred to in FlyBase by the symbol Dmel\CG33700 (FBgn0053700). It is a protein_coding_gene from Dmel. It has one annotated transcript and one polypeptide. Gene sequence location is 3L:9514119..9525544. Its molecular function is described by: . It is involved in the biological process described with: . 8 alleles are reported. No phenotypic data is available. No phenotypic class data…
FBgn0038011	0	0	1	0	0	0	1.53129	0.707309			CG4066	LINK	This gene is referred to in FlyBase by the symbol Dmel\CG4066 (FBgn0038011). It is a protein_coding_gene from Dmel. It has one annotated transcript and one polypeptide. Gene sequence location is 3R:12311353..12313119. Its molecular function is described by: . It is involved in the biological process described with: chorion-containing eggshell formation; negative regulation of cell adhesion. One a…
FBgn0045485	0	0	1	0	0	0	1.53129	0.707309			Gr36c	LINK	The gene Gustatory receptor 36c is referred to in FlyBase by the symbol Dmel\Gr36c (CG31748, FBgn0045485). It is a protein_coding_gene from Dmel. It has one annotated transcript and one polypeptide. Gene sequence location is 2L:17180338..17181632. Its molecular function is described by: bitter taste receptor activity; taste receptor activity; sweet taste receptor activity. It is involved in the b…
FBgn0053922	0	0	1	0	0	0	1.53129	0.707309			CG33922	LINK	This gene is referred to in FlyBase by the symbol Dmel\CG33922 (FBgn0053922). It is a protein_coding_gene from Dmel. It has one annotated transcript and one polypeptide. Gene sequence location is 2L:1343443..1344171. Its molecular function is described by: . It is involved in the biological process described with: . 3 alleles are reported. No phenotypic data is available. The phenotypic class of …
FBgn0002933	0	0	1	0	0	0	1.53129	0.707309			ng1	LINK	The gene new glue 1 is referred to in FlyBase by the symbol Dmel\ng1 (CG10781, FBgn0002933). It is a protein_coding_gene from Dmel. It has one annotated transcript and one polypeptide. Gene sequence location is X:3242412..3242934. Its molecular function is unknown. The biological processes in which it is involved are not known. 7 alleles are reported. No phenotypic data is available. No phenotypi…
FBgn0026389	0	0	1	0	0	0	1.53129	0.707309			Or43a	LINK	The gene Odorant receptor 43a is referred to in FlyBase by the symbol Dmel\Or43a (CG1854, FBgn0026389). It is a protein_coding_gene from Dmel. It has one annotated transcript and one polypeptide. Gene sequence location is 2R:7232840..7234913. Its molecular function is described by: olfactory receptor activity; odorant binding; transmembrane signaling receptor activity. It is involved in the biolo…
FBgn0037418	0	0	1	0	0	0	1.53129	0.707309			Osi11	LINK	The gene Osiris 11 is referred to in FlyBase by the symbol Dmel\Osi11 (CG15596, FBgn0037418). It is a protein_coding_gene from Dmel. It has one annotated transcript and one polypeptide. Gene sequence location is 3R:6267591..6268757. Its molecular function is described by: . It is involved in the biological process described with: . 4 alleles are reported. No phenotypic data is available. The phen…
FBgn0029811	0	0	1	0	0	0	1.53129	0.707309			Cpr5C	LINK	The gene Cuticular protein 5C is referred to in FlyBase by the symbol Dmel\Cpr5C (CG4052, FBgn0029811). It is a protein_coding_gene from Dmel. It has one annotated transcript and one polypeptide. Gene sequence location is X:5804677..5805344. Its molecular function is described by: structural constituent of cuticle; structural constituent of chitin-based larval cuticle. It is involved in the biolo…
FBgn0037414	0	0	1	0	0	0	1.53129	0.707309			Osi7	LINK	The gene Osiris 7 is referred to in FlyBase by the symbol Dmel\Osi7 (CG1153, FBgn0037414). It is a protein_coding_gene from Dmel. It has one annotated transcript and one polypeptide. Gene sequence location is 3R:6248994..6251683. Its molecular function is described by: . The biological processes in which it is involved are not known. 4 alleles are reported. The phenotypes of these alleles manifes…
FBgn0014850	0	0	1	0	0	0	1.53129	0.707309			Eig71Ej	LINK	The gene Eig71Ej is referred to in FlyBase by the symbol Dmel\Eig71Ej (CG7588, FBgn0014850). It is a protein_coding_gene from Dmel. It has one annotated transcript and one polypeptide. Gene sequence location is 3L:15660549..15661015. Its molecular function is unknown. It is involved in the biological process described with: defense response to bacterium; metamorphosis. 2 alleles are reported. No …
FBgn0038873	0	0	1	0	0	0	1.53129	0.707309			CG5892	LINK	This gene is referred to in FlyBase by the symbol Dmel\CG5892 (FBgn0038873). It is a protein_coding_gene from Dmel. It has one annotated transcript and one polypeptide. Gene sequence location is 3R:21242618..21245418. Its molecular function is described by: transferase activity, transferring acyl groups other than amino-acyl groups. The biological processes in which it is involved are not known. …
FBgn0052277	0	0	1	0	0	0	1.53129	0.707309			CG32277	LINK	This gene is referred to in FlyBase by the symbol Dmel\CG32277 (FBgn0052277). It is a protein_coding_gene from Dmel. It has one annotated transcript and one polypeptide. Gene sequence location is 3L:3204600..3205449. Its molecular function is described by: serine-type endopeptidase activity. It is involved in the biological process described with: proteolysis. 4 alleles are reported. No phenotypi…
FBgn0039434	0	0	1	0	0	0	1.53129	0.707309			TwdlM	LINK	The gene TweedleM is referred to in FlyBase by the symbol Dmel\TwdlM (CG5468, FBgn0039434). It is a protein_coding_gene from Dmel. It has one annotated transcript and one polypeptide. Gene sequence location is 3R:26619118..26620224. Its molecular function is described by: structural constituent of chitin-based cuticle. It is involved in the biological process described with: chitin-based cuticle …
FBgn0037139	0	0	1	0	0	0	1.53129	0.707309			CG14563	LINK	This gene is referred to in FlyBase by the symbol Dmel\CG14563 (FBgn0037139). It is a protein_coding_gene from Dmel. It has one annotated transcript and one polypeptide. Gene sequence location is 3L:21841808..21842386. Its molecular function is described by: . It is involved in the biological process described with: . 4 alleles are reported. No phenotypic data is available. No phenotypic class da…
FBgn0036617	0	0	1	0	0	0	1.53129	0.707309			Cpr72Ea	LINK	The gene Cuticular protein 72Ea is referred to in FlyBase by the symbol Dmel\Cpr72Ea (CG4818, FBgn0036617). It is a protein_coding_gene from Dmel. It has one annotated transcript and one polypeptide. Gene sequence location is 3L:16362603..16363750. Its molecular function is described by: structural constituent of cuticle; structural constituent of chitin-based larval cuticle. It is involved in th…
FBgn0034462	0	0	1	0	0	0	1.53129	0.707309			CG15905	LINK	This gene is referred to in FlyBase by the symbol Dmel\CG15905 (FBgn0034462). It is a protein_coding_gene from Dmel. It has 2 annotated transcripts and 2 polypeptides (all unique). Gene sequence location is 2R:19646483..19647645. Its molecular function is unknown. The biological processes in which it is involved are not known. 3 alleles are reported. No phenotypic data is available. The phenotypi…
FBgn0051253	0	0	1	0	0	0	1.53129	0.707309			CG31253	LINK	This gene is referred to in FlyBase by the symbol Dmel\CG31253 (FBgn0051253). It is a protein_coding_gene from Dmel. It has one annotated transcript and one polypeptide. Gene sequence location is 3R:27959346..27960573. Its molecular function is described by: . It is involved in the biological process described with: . No alleles are reported. Summary of modENCODE Temporal Expression Profile: Temp…
FBgn0267413	0	0	1.835	0	0	0	1.53129	0.707309			CG45766	LINK	This gene is referred to in FlyBase by the symbol Dmel\CG45766 (FBgn0267413). It is a protein_coding_gene from Dmel. It has one annotated transcript and one polypeptide. Gene sequence location is Y:3301827..3302701. Its molecular function is unknown. The biological processes in which it is involved are not known. No alleles are reported.
FBgn0036871	0	0	1.053	0	0	0	1.53129	0.707309			CG14096	LINK	This gene is referred to in FlyBase by the symbol Dmel\CG14096 (FBgn0036871). It is a protein_coding_gene from Dmel. It has one annotated transcript and one polypeptide. Gene sequence location is 3L:19466567..19467079. Its molecular function is unknown. The biological processes in which it is involved are not known. No alleles are reported. Summary of modENCODE Temporal Expression Profile: Tempor…
FBgn0262983	1	0	0	0	0	0	1.53088	0.693886			CG43291	LINK	This gene is referred to in FlyBase by the symbol Dmel\CG43291 (FBgn0262983). It is a protein_coding_gene from Dmel. It has 3 annotated transcripts and 3 polypeptides (2 unique). Gene sequence location is 3R:14234984..14244677. Its molecular function is described by: . It is involved in the biological process described with: . No alleles are reported.
FBgn0040842	1	0	0	0	0	0	1.53088	0.693886			CG15212	LINK	This gene is referred to in FlyBase by the symbol Dmel\CG15212 (FBgn0040842). It is a protein_coding_gene from Dmel. It has one annotated transcript and one polypeptide. Gene sequence location is 3L:5131545..5132127. Its molecular function is unknown. The biological processes in which it is involved are not known. One allele is reported. The phenotypes of this allele manifest in: wing; mesothorac…
FBgn0035795	1	0	0	0	0	0	1.53088	0.693886			CG16998	LINK	This gene is referred to in FlyBase by the symbol Dmel\CG16998 (FBgn0035795). It is a protein_coding_gene from Dmel. It has one annotated transcript and one polypeptide. Gene sequence location is 3L:7539060..7539836. Its molecular function is described by: serine-type endopeptidase activity. It is involved in the biological process described with: proteolysis. 4 alleles are reported. No phenotypi…
FBgn0036138	1	0	0	0	0	0	1.53088	0.693886			CG14143	LINK	This gene is referred to in FlyBase by the symbol Dmel\CG14143 (FBgn0036138). It is a protein_coding_gene from Dmel. It has one annotated transcript and one polypeptide. Gene sequence location is 3L:11134987..11135480. Its molecular function is unknown. The biological processes in which it is involved are not known. No alleles are reported. Summary of modENCODE Temporal Expression Profile: Tempor…
FBgn0036427	1	0	0	0	0	0	1.53088	0.693886			CG4613	LINK	This gene is referred to in FlyBase by the symbol Dmel\CG4613 (FBgn0036427). It is a protein_coding_gene from Dmel. It has 2 annotated transcripts and 2 polypeptides (1 unique). Gene sequence location is 3L:14519760..14521690. Its molecular function is described by: serine-type endopeptidase activity. It is involved in the biological process described with: proteolysis. 4 alleles are reported. No…
FBgn0030980	1	0	0	0	0	0	1.53088	0.693886			CG7406	LINK	This gene is referred to in FlyBase by the symbol Dmel\CG7406 (FBgn0030980). It is a protein_coding_gene from Dmel. It has one annotated transcript and one polypeptide. Gene sequence location is X:19077720..19078592. Its molecular function is unknown. The biological processes in which it is involved are not known. 2 alleles are reported. No phenotypic data is available. No phenotypic class data i…
FBgn0036594	1	0	0	0	0	0	1.53088	0.693886			CG13047	LINK	This gene is referred to in FlyBase by the symbol Dmel\CG13047 (FBgn0036594). It is a protein_coding_gene from Dmel. It has one annotated transcript and one polypeptide. Gene sequence location is 3L:16284680..16285396. Its molecular function is unknown. The biological processes in which it is involved are not known. One allele is reported. No phenotypic data is available. The phenotypic classes o…
FBgn0035257	1	0	0	0	0	0	1.53088	0.693886			CG12011	LINK	This gene is referred to in FlyBase by the symbol Dmel\CG12011 (FBgn0035257). It is a protein_coding_gene from Dmel. It has one annotated transcript and one polypeptide. Gene sequence location is 3L:1694617..1696412. Its molecular function is unknown. The biological processes in which it is involved are not known. 5 alleles are reported. No phenotypic data is available. The phenotypic classes of …
FBgn0265146	1	0	0	0	0	0	1.53088	0.693886			CG44215	LINK	This gene is referred to in FlyBase by the symbol Dmel\CG44215 (FBgn0265146). It is a protein_coding_gene from Dmel. It has 2 annotated transcripts and 2 polypeptides (1 unique). Gene sequence location is 3R:14153990..14154441. Its molecular function is unknown. The biological processes in which it is involved are not known. One allele is reported. No phenotypic data is available. No phenotypic c…
FBgn0035012	1	0	0	0	0	0	1.53088	0.693886			CG13590	LINK	This gene is referred to in FlyBase by the symbol Dmel\CG13590 (FBgn0035012). It is a protein_coding_gene from Dmel. It has one annotated transcript and one polypeptide. Gene sequence location is 2R:24493256..24493948. Its molecular function is unknown. The biological processes in which it is involved are not known. 2 alleles are reported. No phenotypic data is available. The phenotypic class of …
FBgn0034880	1	0	0	0	0	0	1.53088	0.693886			ItgaPS5	LINK	The gene Integrin alphaPS5 subunit is referred to in FlyBase by the symbol Dmel\ItgaPS5 (CG5372, FBgn0034880). It is a protein_coding_gene from Dmel. It has one annotated transcript and one polypeptide. Gene sequence location is 2R:23556672..23560263. Its molecular function is described by: protein heterodimerization activity. It is involved in the biological process described with: oocyte growth…
FBgn0262576	1	0	0	0	0	0	1.53088	0.693886			CG43116	LINK	This gene is referred to in FlyBase by the symbol Dmel\CG43116 (FBgn0262576). It is a protein_coding_gene from Dmel. It has one annotated transcript and one polypeptide. Gene sequence location is 3R:25995879..25996996. Its molecular function is described by: . It is involved in the biological process described with: . No alleles are reported.
FBgn0053798	1	0	0	0	0	0	1.53088	0.693886			CG33798	LINK	This gene is referred to in FlyBase by the symbol Dmel\CG33798 (FBgn0053798). It is a protein_coding_gene from Dmel. It has one annotated transcript and one polypeptide. Gene sequence location is 2R:12993897..12994622. Its molecular function is described by: . It is involved in the biological process described with: . 2 alleles are reported. No phenotypic data is available. The phenotypic classes…
FBgn0053895	1	0	0	0	0	0	1.53088	0.693886			His4:CG33895	LINK	The gene His4:CG33895 is referred to in FlyBase by the symbol Dmel\His4:CG33895 (CG33895, FBgn0053895). It is a protein_coding_gene from Dmel. It has one annotated transcript and one polypeptide. Gene sequence location is 2L:21468956..21469368. Its molecular function is described by: DNA binding; histone binding; protein heterodimerization activity. It is involved in the biological process descri…
FBgn0004054	1	0	0	0	0	0	1.53088	0.693886			zen2	LINK	The gene zerknullt-related is referred to in FlyBase by the symbol Dmel\zen2 (CG1048, FBgn0004054). It is a protein_coding_gene from Dmel. It has 2 annotated transcripts and 2 polypeptides (all unique). Gene sequence location is 3R:6743135..6744136. Its molecular function is described by: DNA-binding transcription factor activity; RNA polymerase II cis-regulatory region sequence-specific DNA bind…
FBgn0041231	1	0	0	0	0	0	1.53088	0.693886			Gr68a	LINK	The gene Gustatory receptor 68a is referred to in FlyBase by the symbol Dmel\Gr68a (CG7303, FBgn0041231). It is a protein_coding_gene from Dmel. It has one annotated transcript and one polypeptide. Gene sequence location is 3L:11751305..11752474. Its molecular function is described by: taste receptor activity. It is involved in the biological process described with: response to pheromone; detecti…
FBgn0053690	1	0	0	0	0	0	1.53088	0.693886			dls	LINK	The gene daedalus on 3 is referred to in FlyBase by the symbol Dmel\dls (CG33690, FBgn0053690). It is a protein_coding_gene from Dmel. It has one annotated transcript and one polypeptide. Gene sequence location is 3L:16201328..16202032. Its molecular function is described by: . It is involved in the biological process described with: . One allele is reported. No phenotypic data is available. No p…
FBgn0039551	1	0	0	0	0	0	1.53088	0.693886			Or98a	LINK	The gene Odorant receptor 98a is referred to in FlyBase by the symbol Dmel\Or98a (CG5540, FBgn0039551). It is a protein_coding_gene from Dmel. It has one annotated transcript and one polypeptide. Gene sequence location is 3R:27845950..27847260. Its molecular function is described by: odorant binding; olfactory receptor activity. It is involved in the biological process described with: detection o…
FBgn0028517	1	0	0	0	0	0	1.53088	0.693886			CG18478	LINK	This gene is referred to in FlyBase by the symbol Dmel\CG18478 (FBgn0028517). It is a protein_coding_gene from Dmel. It has one annotated transcript and one polypeptide. Gene sequence location is 2L:15670174..15671223. Its molecular function is unknown. It is involved in the biological process described with: proteolysis. One allele is reported. No phenotypic data is available. No phenotypic clas…
FBgn0035865	1	0	0	0	0	0	1.53088	0.693886			CG7201	LINK	This gene is referred to in FlyBase by the symbol Dmel\CG7201 (FBgn0035865). It is a protein_coding_gene from Dmel. It has 2 annotated transcripts and 2 polypeptides (1 unique). Gene sequence location is 3L:8290286..8295327. Its molecular function is unknown. The biological processes in which it is involved are not known. 3 alleles are reported. No phenotypic data is available. The phenotypic cla…
FBgn0039079	1	0	0	0	0	0	1.53088	0.693886			Ir94g	LINK	The gene Ionotropic receptor 94g is referred to in FlyBase by the symbol Dmel\Ir94g (CG17381, FBgn0039079). It is a protein_coding_gene from Dmel. It has one annotated transcript and one polypeptide. Gene sequence location is 3R:23483863..23485500. Its molecular function is described by: ligand-gated ion channel activity. It is involved in the biological process described with: detection of chemi…
FBgn0038003	1	0	0	0	0	0	1.53088	0.693886			CG3916	LINK	This gene is referred to in FlyBase by the symbol Dmel\CG3916 (FBgn0038003). It is a protein_coding_gene from Dmel. It has one annotated transcript and one polypeptide. Gene sequence location is 3R:12229413..12230425. Its molecular function is described by: serine-type endopeptidase activity. It is involved in the biological process described with: proteolysis. 5 alleles are reported. No phenotyp…
FBgn0039288	1	0	0	0	0	0	1.53088	0.693886			CG13653	LINK	This gene is referred to in FlyBase by the symbol Dmel\CG13653 (FBgn0039288). It is a protein_coding_gene from Dmel. It has one annotated transcript and one polypeptide. Gene sequence location is 3R:25195527..25196531. Its molecular function is unknown. The biological processes in which it is involved are not known. 3 alleles are reported. No phenotypic data is available. The phenotypic class of …
FBgn0029644	1	0	0	0	0	0	1.53088	0.693886			CG14421	LINK	This gene is referred to in FlyBase by the symbol Dmel\CG14421 (FBgn0029644). It is a protein_coding_gene from Dmel. It has one annotated transcript and one polypeptide. Gene sequence location is X:2941408..2942329. Its molecular function is unknown. The biological processes in which it is involved are not known. 2 alleles are reported. No phenotypic data is available. No phenotypic class data is…
FBgn0033726	1	0	0	0	0	0	1.53088	0.693886			Cpr49Ad	LINK	The gene Cuticular protein 49Ad is referred to in FlyBase by the symbol Dmel\Cpr49Ad (CG8836, FBgn0033726). It is a protein_coding_gene from Dmel. It has one annotated transcript and one polypeptide. Gene sequence location is 2R:12390896..12391699. Its molecular function is described by: structural constituent of chitin-based larval cuticle; structural constituent of cuticle. It is involved in th…
FBgn0038931	1	0	0	0	0	0	1.53088	0.693886			CG13407	LINK	This gene is referred to in FlyBase by the symbol Dmel\CG13407 (FBgn0038931). It is a protein_coding_gene from Dmel. It has one annotated transcript and one polypeptide. Gene sequence location is 3R:22103414..22105590. Its molecular function is described by: . It is involved in the biological process described with: . 4 alleles are reported. The phenotype of these alleles manifest in: mesothoraci…
FBgn0038942	1	0	0	0	0	0	1.53088	0.693886			CG13862	LINK	This gene is referred to in FlyBase by the symbol Dmel\CG13862 (FBgn0038942). It is a protein_coding_gene from Dmel. It has one annotated transcript and one polypeptide. Gene sequence location is 3R:22331991..22332559. Its molecular function is unknown. The biological processes in which it is involved are not known. 2 alleles are reported. No phenotypic data is available. The phenotypic class of …
FBgn0039429	1	0	0	0	0	0	1.53088	0.693886			CG14238	LINK	This gene is referred to in FlyBase by the symbol Dmel\CG14238 (FBgn0039429). It is a protein_coding_gene from Dmel. It has one annotated transcript and one polypeptide. Gene sequence location is 3R:26458249..26460981. Its molecular function is unknown. The biological processes in which it is involved are not known. 3 alleles are reported. The phenotype of these alleles manifest in: chaeta. The p…
FBgn0039441	1	0	0	0	0	0	1.53088	0.693886			TwdlN	LINK	The gene TweedleN is referred to in FlyBase by the symbol Dmel\TwdlN (CG5476, FBgn0039441). It is a protein_coding_gene from Dmel. It has one annotated transcript and one polypeptide. Gene sequence location is 3R:26631869..26632956. Its molecular function is described by: structural constituent of chitin-based cuticle. It is involved in the biological process described with: chitin-based cuticle …
FBgn0030551	1	0.718	0	0	0	0	1.53088	0.693886			CG11674	LINK	This gene is referred to in FlyBase by the symbol Dmel\CG11674 (FBgn0030551). It is a protein_coding_gene from Dmel. It has one annotated transcript and one polypeptide. Gene sequence location is X:14224647..14225879. Its molecular function is unknown. The biological processes in which it is involved are not known. 8 alleles are reported. The phenotype of these alleles manifest in: mesothoracic t…
FBgn0040565	1	0	0	0	0	0	1.53088	0.693886			CG7606	LINK	This gene is referred to in FlyBase by the symbol Dmel\CG7606 (FBgn0040565). It is a protein_coding_gene from Dmel. It has 2 annotated transcripts and 2 polypeptides (1 unique). Gene sequence location is 3R:17596536..17598453. Its molecular function is unknown. The biological processes in which it is involved are not known. 2 alleles are reported. No phenotypic data is available. No phenotypic cl…
FBgn0034428	1.04	0	0	0	0	0	1.53088	0.693886			AANATL6	LINK	The gene Arylalkylamine N-acetyltransferase-like 6 is referred to in FlyBase by the symbol Dmel\AANATL6 (CG18606, FBgn0034428). It is a protein_coding_gene from Dmel. It has one annotated transcript and one polypeptide. Gene sequence location is 2R:19287983..19288995. Its molecular function is described by: N-acetyltransferase activity. The biological processes in which it is involved are not kno…
FBgn0050471	1.042	0	0	0	0	0	1.53088	0.693886			CG30471	LINK	This gene is referred to in FlyBase by the symbol Dmel\CG30471 (FBgn0050471). It is a protein_coding_gene from Dmel. It has one annotated transcript and one polypeptide. Gene sequence location is 2R:15533520..15537782. Its molecular function is described by: transferase activity, transferring acyl groups other than amino-acyl groups. The biological processes in which it is involved are not known.…
FBgn0034785	1	0	0	0	0	0	1.53088	0.693886			CG3649	LINK	This gene is referred to in FlyBase by the symbol Dmel\CG3649 (FBgn0034785). It is a protein_coding_gene from Dmel. It has one annotated transcript and one polypeptide. Gene sequence location is 2R:22845977..22847911. Its molecular function is described by: transmembrane transporter activity. It is involved in the biological process described with: anion transport; transmembrane transport. 6 alle…
FBgn0033591	1	0	0	0	0	0	1.53088	0.693886			CG13216	LINK	This gene is referred to in FlyBase by the symbol Dmel\CG13216 (FBgn0033591). It is a protein_coding_gene from Dmel. It has one annotated transcript and one polypeptide. Gene sequence location is 2R:11238108..11238995. Its molecular function is described by: . It is involved in the biological process described with: . 3 alleles are reported. No phenotypic data is available. The phenotypic class o…
FBgn0039101	2	7	2	1	2	2	1.52079	0.204506	0.999974		CG16710	LINK	This gene is referred to in FlyBase by the symbol Dmel\CG16710 (FBgn0039101). It is a protein_coding_gene from Dmel. It has one annotated transcript and one polypeptide. Gene sequence location is 3R:23682503..23683980. Its molecular function is described by: serine-type endopeptidase activity. It is involved in the biological process described with: proteolysis. 6 alleles are reported. The phenot…
FBgn0027259	33.573	18.479	36.775	19.074	17.613	12.844	1.51832	0.00191638	0.323661		Kmn1	LINK	The gene kinetochore Mis12-Ndc80 network component 1 is referred to in FlyBase by the symbol Dmel\Kmn1 (CG1558, FBgn0027259). It is a protein_coding_gene from Dmel. It has 2 annotated transcripts and 2 polypeptides (1 unique). Gene sequence location is X:11571383..11572442. Its molecular function is unknown. It is involved in the biological process described with: chromosome segregation; mitotic …
FBgn0005696	4	3	6	3.004	3	1	1.51773	0.14473	0.999974		PolA2	LINK	The gene DNA polymerase alpha subunit 2 is referred to in FlyBase by the symbol Dmel\PolA2 (CG5923, FBgn0005696). It is a protein_coding_gene from Dmel. It has one annotated transcript and one polypeptide. Gene sequence location is 3R:27239163..27241228. Its molecular function is described by: DNA binding; DNA-directed DNA polymerase activity. It is involved in the biological process described wi…
FBgn0034996	1	2	1	1	1	0	1.50823	0.424494			CG13575	LINK	This gene is referred to in FlyBase by the symbol Dmel\CG13575 (FBgn0034996). It is a protein_coding_gene from Dmel. It has one annotated transcript and one polypeptide. Gene sequence location is 2R:24255327..24257414. Its molecular function is described by: neuropeptide receptor activity; G protein-coupled peptide receptor activity; G protein-coupled receptor activity. It is involved in the biol…
FBgn0051661	0	1	0	0	0	0	1.50712	0.711785			CG31661	LINK	This gene is referred to in FlyBase by the symbol Dmel\CG31661 (FBgn0051661). It is a protein_coding_gene from Dmel. It has one annotated transcript and one polypeptide. Gene sequence location is 2L:1497243..1498583. Its molecular function is described by: aspartic-type endopeptidase activity. It is involved in the biological process described with: proteolysis; cell death; eggshell chorion assem…
FBgn0051661	0	1	0	0	0	0	1.50712	0.711785			CG31661	LINK	This gene is referred to in FlyBase by the symbol Dmel\CG31661 (FBgn0051661). It is a protein_coding_gene from Dmel. It has one annotated transcript and one polypeptide. Gene sequence location is 2L:1497243..1498583. Its molecular function is described by: aspartic-type endopeptidase activity. It is involved in the biological process described with: proteolysis; cell death; eggshell chorion assem…
FBgn0035627	0	1.022	0	0	0	0	1.50712	0.711785			Sse	LINK	The gene Separase is referred to in FlyBase by the symbol Dmel\Sse (CG10583, FBgn0035627). It is a protein_coding_gene from Dmel. It has one annotated transcript and one polypeptide. Gene sequence location is 3L:5659700..5662247. Its molecular function is described by: protein binding; cysteine-type endopeptidase activity. It is involved in the biological process described with: telomere capping;…
FBgn0003373	0	1	0	0	0	0	1.50712	0.711785			Sgs3	LINK	The gene Salivary gland secretion 3 is referred to in FlyBase by the symbol Dmel\Sgs3 (CG11720, FBgn0003373). It is a protein_coding_gene from Dmel. It has one annotated transcript and one polypeptide. Gene sequence location is 3L:11512221..11513402. Its molecular function is described by: extracellular matrix structural constituent. It is involved in the biological process described with: pupari…
FBgn0036352	0	1	0	0	0	0	1.50712	0.711785			CG14110	LINK	This gene is referred to in FlyBase by the symbol Dmel\CG14110 (FBgn0036352). It is a protein_coding_gene from Dmel. It has one annotated transcript and one polypeptide. Gene sequence location is 3L:13384789..13385925. Its molecular function is unknown. The biological processes in which it is involved are not known. 4 alleles are reported. No phenotypic data is available. The phenotypic class of …
FBgn0036639	0	1	0	0	0	0	1.50712	0.711785			CG4229	LINK	This gene is referred to in FlyBase by the symbol Dmel\CG4229 (FBgn0036639). It is a protein_coding_gene from Dmel. It has one annotated transcript and one polypeptide. Gene sequence location is 3L:16556823..16557958. Its molecular function is described by: . It is involved in the biological process described with: . 2 alleles are reported. No phenotypic data is available. The phenotypic class of…
FBgn0030570	0	1	0	0	0	0	1.50712	0.711785			CG12540	LINK	This gene is referred to in FlyBase by the symbol Dmel\CG12540 (FBgn0030570). It is a protein_coding_gene from Dmel. It has one annotated transcript and one polypeptide. Gene sequence location is X:14496135..14497240. Its molecular function is unknown. The biological processes in which it is involved are not known. 2 alleles are reported. No phenotypic data is available. No phenotypic class data …
FBgn0030385	0	1	0	0	0	0	1.50712	0.711785			Ir11a	LINK	The gene Ionotropic receptor 11a is referred to in FlyBase by the symbol Dmel\Ir11a (CG15732, FBgn0030385). It is a protein_coding_gene from Dmel. It has one annotated transcript and one polypeptide. Gene sequence location is X:12375596..12377755. Its molecular function is described by: ligand-gated ion channel activity. It is involved in the biological process described with: sensory perception …
FBgn0030394	0	1	0	0	0	0	1.50712	0.711785			Cpr11A	LINK	The gene Cuticular protein 11A is referred to in FlyBase by the symbol Dmel\Cpr11A (CG2560, FBgn0030394). It is a protein_coding_gene from Dmel. It has one annotated transcript and one polypeptide. Gene sequence location is X:12486970..12489448. Its molecular function is described by: structural constituent of chitin-based larval cuticle; structural constituent of cuticle. It is involved in the b…
FBgn0021742	0	1	0	0	0	0	1.50712	0.711785			C901	LINK	The gene C901 is referred to in FlyBase by the symbol Dmel\C901 (CG1567, FBgn0021742). It is a protein_coding_gene from Dmel. It has one annotated transcript and one polypeptide. Gene sequence location is X:10964032..10967134. Its molecular function is described by: Notch binding. It is involved in the biological process described with: cell communication. 2 alleles are reported. No phenotypic da…
FBgn0036177	0	1	0	0	0	0	1.50712	0.711785			CG33268	LINK	This gene is referred to in FlyBase by the symbol Dmel\CG33268 (FBgn0036177). It is a protein_coding_gene from Dmel. It has one annotated transcript and one polypeptide. Gene sequence location is 3L:11590872..11591231. Its molecular function is described by: . It is involved in the biological process described with: . No alleles are reported. Summary of modENCODE Temporal Expression Profile: Temp…
FBgn0030338	0	1	0	0	0	0	1.50712	0.711785			CG15741	LINK	This gene is referred to in FlyBase by the symbol Dmel\CG15741 (FBgn0030338). It is a protein_coding_gene from Dmel. It has one annotated transcript and one polypeptide. Gene sequence location is X:11837543..11838026. Its molecular function is described by: . It is involved in the biological process described with: . 2 alleles are reported. No phenotypic data is available. The phenotypic classes …
FBgn0035328	0	1	0	0	0	0	1.50712	0.711785			yellow-g2	LINK	The gene yellow-g2 is referred to in FlyBase by the symbol Dmel\yellow-g2 (CG13804, FBgn0035328). It is a protein_coding_gene from Dmel. It has one annotated transcript and one polypeptide. Gene sequence location is 3L:2276550..2278038. Its molecular function is unknown. The biological processes in which it is involved are not known. 5 alleles are reported. No phenotypic data is available. The ph…
FBgn0267104	0	1	0	0	0	0	1.50712	0.711785			CG45544	LINK	This gene is referred to in FlyBase by the symbol Dmel\CG45544 (FBgn0267104). It is a protein_coding_gene from Dmel. It has 2 annotated transcripts and 2 polypeptides (1 unique). Gene sequence location is 3R:29256485..29257425. Its molecular function is described by: . It is involved in the biological process described with: . No alleles are reported.
FBgn0265256	0	1	0	0	0	0	1.50712	0.711785			CG44270	LINK	This gene is referred to in FlyBase by the symbol Dmel\CG44270 (FBgn0265256). It is a protein_coding_gene from Dmel. It has one annotated transcript and one polypeptide. Gene sequence location is 2L:20531066..20531833. Its molecular function is described by: . It is involved in the biological process described with: . No alleles are reported.
FBgn0085332	0	1.016	0	0	0	0	1.50712	0.711785			CG34303	LINK	This gene is referred to in FlyBase by the symbol Dmel\CG34303 (FBgn0085332). It is a protein_coding_gene from Dmel. It has one annotated transcript and one polypeptide. Gene sequence location is 3R:10151153..10151880. Its molecular function is described by: . It is involved in the biological process described with: . No alleles are reported. Summary of modENCODE Temporal Expression Profile: Temp…
FBgn0053986	0	1.004	0	0	0	0	1.50712	0.711785			CG33986	LINK	This gene is referred to in FlyBase by the symbol Dmel\CG33986 (FBgn0053986). It is a protein_coding_gene from Dmel. It has one annotated transcript and one polypeptide. Gene sequence location is 3L:15524325..15525253. Its molecular function is described by: chitin binding. It is involved in the biological process described with: chitin metabolic process. No alleles are reported. Summary of modEN…
FBgn0002631	0	1	0	0	0	0	1.50712	0.711785			E(spl)m5-HLH	LINK	The gene Enhancer of split m5, helix-loop-helix is referred to in FlyBase by the symbol Dmel\E(spl)m5-HLH (CG6096, FBgn0002631). It is a protein_coding_gene from Dmel. It has one annotated transcript and one polypeptide. Gene sequence location is 3R:26028854..26029735. Its molecular function is described by 6 unique terms, many of which group under: binding; DNA-binding transcription factor activ…
FBgn0053889	0	1.542	0	0	0	0	1.50712	0.711785			His4:CG33889	LINK	The gene His4:CG33889 is referred to in FlyBase by the symbol Dmel\His4:CG33889 (CG33889, FBgn0053889). It is a protein_coding_gene from Dmel. It has one annotated transcript and one polypeptide. Gene sequence location is 2L:21484085..21484497. Its molecular function is described by: protein heterodimerization activity; histone binding; DNA binding. It is involved in the biological process descri…
FBgn0052269	0	1	0	0	0	0	1.50712	0.711785			CG32269	LINK	This gene is referred to in FlyBase by the symbol Dmel\CG32269 (FBgn0052269). It is a protein_coding_gene from Dmel. It has 2 annotated transcripts and 2 polypeptides (1 unique). Gene sequence location is 3L:3206949..3208985. Its molecular function is described by: serine-type endopeptidase activity. It is involved in the biological process described with: proteolysis. One allele is reported. No …
FBgn0053643	0	1.223	0	0	0	0	1.50712	0.711785			CG33643	LINK	This gene is referred to in FlyBase by the symbol Dmel\CG33643 (FBgn0053643). It is a protein_coding_gene from Dmel. It has one annotated transcript and one polypeptide. Gene sequence location is 2L:13531074..13531662. Its molecular function is described by: . It is involved in the biological process described with: . 4 alleles are reported. No phenotypic data is available. The phenotypic class o…
FBgn0053641	0	1.459	0	0	0	0	1.50712	0.711785			CG33641	LINK	This gene is referred to in FlyBase by the symbol Dmel\CG33641 (FBgn0053641). It is a protein_coding_gene from Dmel. It has one annotated transcript and one polypeptide. Gene sequence location is 2L:13529042..13529821. Its molecular function is described by: . It is involved in the biological process described with: . 2 alleles are reported. No phenotypic data is available. The phenotypic classes…
FBgn0053483	0	1	0	0	0	0	1.50712	0.711785			CG33483	LINK	This gene is referred to in FlyBase by the symbol Dmel\CG33483 (FBgn0053483). It is a protein_coding_gene from Dmel. It has 2 annotated transcripts and 2 polypeptides (all unique). Gene sequence location is 3R:30900718..30902161. Its molecular function is described by: . It is involved in the biological process described with: . 2 alleles are reported. No phenotypic data is available. No phenotyp…
FBgn0032127	0	1.008	0	0	0	0	1.50712	0.711785			CG13114	LINK	This gene is referred to in FlyBase by the symbol Dmel\CG13114 (FBgn0032127). It is a protein_coding_gene from Dmel. It has one annotated transcript and one polypeptide. Gene sequence location is 2L:9545811..9547424. Its molecular function is unknown. The biological processes in which it is involved are not known. 3 alleles are reported. No phenotypic data is available. The phenotypic class of al…
FBgn0033469	0	1	0	0	0	0	1.50712	0.711785			CG12133	LINK	This gene is referred to in FlyBase by the symbol Dmel\CG12133 (FBgn0033469). It is a protein_coding_gene from Dmel. It has one annotated transcript and one polypeptide. Gene sequence location is 2R:9967231..9968388. Its molecular function is described by: serine-type endopeptidase activity. It is involved in the biological process described with: proteolysis. 4 alleles are reported. No phenotypi…
FBgn0040797	0	1	0	0	0	0	1.50712	0.711785			CG13066	LINK	This gene is referred to in FlyBase by the symbol Dmel\CG13066 (FBgn0040797). It is a protein_coding_gene from Dmel. It has one annotated transcript and one polypeptide. Gene sequence location is 3L:16272909..16273608. Its molecular function is unknown. The biological processes in which it is involved are not known. One allele is reported. No phenotypic data is available. The phenotypic class of …
FBgn0038161	0	1	0	0	0	0	1.50712	0.711785			CG9269	LINK	This gene is referred to in FlyBase by the symbol Dmel\CG9269 (FBgn0038161). It is a protein_coding_gene from Dmel. It has one annotated transcript and one polypeptide. Gene sequence location is 3R:13615917..13616492. Its molecular function is described by: . It is involved in the biological process described with: . 2 alleles are reported. No phenotypic data is available. No phenotypic class dat…
FBgn0000564	0	1	0	0	0	0	1.50712	0.711785			Eh	LINK	The gene Eclosion hormone is referred to in FlyBase by the symbol Dmel\Eh (CG5400, FBgn0000564). It is a protein_coding_gene from Dmel. It has 2 annotated transcripts and 2 polypeptides (1 unique). Gene sequence location is 3R:17446642..17448858. Its molecular function is described by: ecdysis-triggering hormone activity; eclosion hormone activity; neuropeptide hormone activity. It is involved in…
FBgn0043577	0	1	0	0	0	0	1.50712	0.711785			PGRP-SB2	LINK	The gene Peptidoglycan recognition protein SB2 is referred to in FlyBase by the symbol Dmel\PGRP-SB2 (CG9697, FBgn0043577). It is a protein_coding_gene from Dmel. It has 2 annotated transcripts and 2 polypeptides (all unique). Gene sequence location is 3L:16726541..16727288. Its molecular function is described by: zinc ion binding; peptidoglycan binding; N-acetylmuramoyl-L-alanine amidase activit…
FBgn0003057	0	1.001	0	0	0	0	1.50712	0.711785			CG10598	LINK	This gene is referred to in FlyBase by the symbol Dmel\CG10598 (FBgn0003057). It is a protein_coding_gene from Dmel. It has 2 annotated transcripts and 2 polypeptides (1 unique). Gene sequence location is X:17225157..17226867. Its molecular function is unknown. The biological processes in which it is involved are not known. 4 alleles are reported. No phenotypic data is available. No phenotypic cl…
FBgn0034456	0	1	0	0	0	0	1.50712	0.711785			Ir56b	LINK	The gene Ionotropic receptor 56b is referred to in FlyBase by the symbol Dmel\Ir56b (CG15121, FBgn0034456). It is a protein_coding_gene from Dmel. It has one annotated transcript and one polypeptide. Gene sequence location is 2R:19508167..19509653. Its molecular function is described by: ligand-gated ion channel activity. It is involved in the biological process described with: detection of chemi…
FBgn0029645	0	1.086	0	0	0	0	1.50712	0.711785			CG14422	LINK	This gene is referred to in FlyBase by the symbol Dmel\CG14422 (FBgn0029645). It is a protein_coding_gene from Dmel. It has one annotated transcript and one polypeptide. Gene sequence location is X:2943386..2944569. Its molecular function is unknown. The biological processes in which it is involved are not known. 2 alleles are reported. The phenotypes of these alleles manifest in: mesothoracic te…
FBgn0026392	0	1	0	0	0	0	1.50712	0.711785			Or33a	LINK	The gene Odorant receptor 33a is referred to in FlyBase by the symbol Dmel\Or33a (CG16960, FBgn0026392). It is a protein_coding_gene from Dmel. It has one annotated transcript and one polypeptide. Gene sequence location is 2L:11934505..11935716. Its molecular function is described by: odorant binding; transmembrane signaling receptor activity; olfactory receptor activity. It is involved in the bi…
FBgn0052074	0	1.085	0	0	0	0	1.50712	0.711785			CG32074	LINK	This gene is referred to in FlyBase by the symbol Dmel\CG32074 (FBgn0052074). It is a protein_coding_gene from Dmel. It has one annotated transcript and one polypeptide. Gene sequence location is 3L:11131883..11132322. Its molecular function is described by: . It is involved in the biological process described with: . 2 alleles are reported. No phenotypic data is available. The phenotypic classes…
FBgn0052237	0	1.001	0	0	0	0	1.50712	0.711785			CG32237	LINK	This gene is referred to in FlyBase by the symbol Dmel\CG32237 (FBgn0052237). It is a protein_coding_gene from Dmel. It has one annotated transcript and one polypeptide. Gene sequence location is 3L:4849438..4852461. Its molecular function is unknown. The biological processes in which it is involved are not known. 2 alleles are reported. No phenotypic data is available. The phenotypic class of al…
FBgn0029532	0	1.002	0	0	0	0	1.50712	0.711785			CG13361	LINK	This gene is referred to in FlyBase by the symbol Dmel\CG13361 (FBgn0029532). It is a protein_coding_gene from Dmel. It has one annotated transcript and one polypeptide. Gene sequence location is X:752011..753653. Its molecular function is described by: . It is involved in the biological process described with: . 3 alleles are reported. No phenotypic data is available. The phenotypic class of all…
FBgn0031803	0	1	0	0	0	0	1.50712	0.711785			ppk14	LINK	The gene pickpocket 14 is referred to in FlyBase by the symbol Dmel\ppk14 (CG9501, FBgn0031803). It is a protein_coding_gene from Dmel. It has one annotated transcript and one polypeptide. Gene sequence location is 2L:6354956..6356672. Its molecular function is described by: sodium channel activity; ligand-gated sodium channel activity. It is involved in the biological process described with: sod…
FBgn0037677	0	1	0	0	0	0	1.50712	0.711785			CG12951	LINK	This gene is referred to in FlyBase by the symbol Dmel\CG12951 (FBgn0037677). It is a protein_coding_gene from Dmel. It has one annotated transcript and one polypeptide. Gene sequence location is 3R:9329223..9330331. Its molecular function is described by: serine-type endopeptidase activity. It is involved in the biological process described with: proteolysis. 5 alleles are reported. The phenotyp…
FBgn0032442	0	1	0	0	0	0	1.50712	0.711785			Nepl7	LINK	The gene Neprilysin-like 7 is referred to in FlyBase by the symbol Dmel\Nepl7 (CG15485, FBgn0032442). It is a protein_coding_gene from Dmel. It has 2 annotated transcripts and 2 polypeptides (1 unique). Gene sequence location is 2L:12667248..12669714. Its molecular function is described by: metalloendopeptidase activity. It is involved in the biological process described with: proteolysis. One al…
FBgn0267690	0	1	0	0	0	0	1.50712	0.711785			CG46026	LINK	This gene is referred to in FlyBase by the symbol Dmel\CG46026 (FBgn0267690). It is a protein_coding_gene from Dmel. It has one annotated transcript and one polypeptide. Gene sequence location is 3R:6306884..6309030. Its molecular function is unknown. The biological processes in which it is involved are not known. One allele is reported. No phenotypic data is available. The phenotypic class of al…
FBgn0030009	0	1.102	0	0	0	0	1.50712	0.711785			CG15336	LINK	This gene is referred to in FlyBase by the symbol Dmel\CG15336 (FBgn0030009). It is a protein_coding_gene from Dmel. It has one annotated transcript and one polypeptide. Gene sequence location is X:8147949..8148705. Its molecular function is described by: sequence-specific DNA binding. It is involved in the biological process described with: . 9 alleles are reported. The phenotype of these allele…
FBgn0264487	0	1	0	0	0	0	1.50712	0.711785			CG43895	LINK	This gene is referred to in FlyBase by the symbol Dmel\CG43895 (FBgn0264487). It is a protein_coding_gene from Dmel. It has one annotated transcript and one polypeptide. Gene sequence location is 3L:21813005..21813698. Its molecular function is described by: . It is involved in the biological process described with: . No alleles are reported.
FBgn0039522	0	1	0	0	0	0	1.50712	0.711785			CG13972	LINK	This gene is referred to in FlyBase by the symbol Dmel\CG13972 (FBgn0039522). It is a protein_coding_gene from Dmel. It has one annotated transcript and one polypeptide. Gene sequence location is 3R:27515911..27517257. Its molecular function is unknown. It is involved in the biological process described with: cilium organization. 2 alleles are reported. No phenotypic data is available. The phenot…
FBgn0014466	0	1	0	0	0	0	1.50712	0.711785			Cp7Fc	LINK	The gene Chorion protein c at 7F is referred to in FlyBase by the symbol Dmel\Cp7Fc (CG15351, FBgn0014466). It is a protein_coding_gene from Dmel. It has one annotated transcript and one polypeptide. Gene sequence location is X:8477117..8478320. Its molecular function is described by: . It is involved in the biological process described with: chorion-containing eggshell formation. 6 alleles are r…
FBgn0037501	0	1	0	0	0	0	1.50712	0.711785			Ir84a	LINK	The gene Ionotropic receptor 84a is referred to in FlyBase by the symbol Dmel\Ir84a (CG10101, FBgn0037501). It is a protein_coding_gene from Dmel. It has one annotated transcript and one polypeptide. Gene sequence location is 3R:7406869..7409384. Its molecular function is described by 6 unique terms, many of which group under: molecular transducer activity; extracellular ligand-gated ion channel …
FBgn0033651	0	1	0	0	0	0	1.50712	0.711785			Ir48c	LINK	The gene Ionotropic receptor 48c is referred to in FlyBase by the symbol Dmel\Ir48c (CG12444, FBgn0033651). It is a protein_coding_gene from Dmel. It has one annotated transcript and one polypeptide. Gene sequence location is 2R:11787808..11789493. Its molecular function is described by: ligand-gated ion channel activity. It is involved in the biological process described with: Golgi organization…
FBgn0053117	0	1	0	0	0	0	1.50712	0.711785			Victoria	LINK	The gene Victoria is referred to in FlyBase by the symbol Dmel\Victoria (CG33117, FBgn0053117). It is a protein_coding_gene from Dmel. It has one annotated transcript and one polypeptide. Gene sequence location is 2L:19912938..19913516. Its molecular function is unknown. It is involved in the biological process described with: response to heat; cellular response to heat; cellular response to UV; …
FBgn0032489	0	1	0	0	0	0	1.50712	0.711785			CG15480	LINK	This gene is referred to in FlyBase by the symbol Dmel\CG15480 (FBgn0032489). It is a protein_coding_gene from Dmel. It has one annotated transcript and one polypeptide. Gene sequence location is 2L:13224620..13225275. Its molecular function is unknown. The biological processes in which it is involved are not known. 2 alleles are reported. The phenotype of these alleles manifest in: mesothoracic …
FBgn0051225	0	1	0	0	0	0	1.50712	0.711785			Ir94f	LINK	The gene Ionotropic receptor 94f is referred to in FlyBase by the symbol Dmel\Ir94f (CG31225, FBgn0051225). It is a protein_coding_gene from Dmel. It has one annotated transcript and one polypeptide. Gene sequence location is 3R:23481865..23483541. Its molecular function is described by: ligand-gated ion channel activity. It is involved in the biological process described with: detection of chemi…
FBgn0003979	0	1	0	0	0	0	1.50712	0.711785			Vm26Aa	LINK	The gene Vitelline membrane 26Aa is referred to in FlyBase by the symbol Dmel\Vm26Aa (CG9048, FBgn0003979). It is a protein_coding_gene from Dmel. It has 2 annotated transcripts and 2 polypeptides (1 unique). Gene sequence location is 2L:5959596..5960340. Its molecular function is unknown. It is involved in the biological process described with: oogenesis; vitelline membrane formation involved in…
FBgn0002734	0	1	0	0	0	0	1.50712	0.711785			E(spl)mdelta-HLH	LINK	The gene Enhancer of split mdelta, helix-loop-helix is referred to in FlyBase by the symbol Dmel\E(spl)mdelta-HLH (CG8328, FBgn0002734). It is a protein_coding_gene from Dmel. It has one annotated transcript and one polypeptide. Gene sequence location is 3R:25997621..25998633. Its molecular function is described by: protein dimerization activity; sequence-specific DNA binding; DNA-binding transcr…
FBgn0038643	0	1	0	0	0	0	1.50712	0.711785			CG14300	LINK	This gene is referred to in FlyBase by the symbol Dmel\CG14300 (FBgn0038643). It is a protein_coding_gene from Dmel. It has one annotated transcript and one polypeptide. Gene sequence location is 3R:18693293..18693711. Its molecular function is described by: chitin binding. It is involved in the biological process described with: chitin metabolic process. 4 alleles are reported. The phenotype of …
FBgn0053475	0	1	0	0	0	0	1.50712	0.711785			CG33475	LINK	This gene is referred to in FlyBase by the symbol Dmel\CG33475 (FBgn0053475). It is a protein_coding_gene from Dmel. It has one annotated transcript and one polypeptide. Gene sequence location is 2R:10410770..10411213. Its molecular function is described by: . It is involved in the biological process described with: . 2 alleles are reported. No phenotypic data is available. No phenotypic class da…
FBgn0004143	0	1	0	0	0	0	1.50712	0.711785			nullo	LINK	The gene nullo is referred to in FlyBase by the symbol Dmel\nullo (CG14426, FBgn0004143). It is a protein_coding_gene from Dmel. It has one annotated transcript and one polypeptide. Gene sequence location is X:7049476..7050321. Its molecular function is unknown. It is involved in the biological process described with: morphogenesis of embryonic epithelium; regulation of cell shape; cell-cell junc…
FBgn0034548	0	1	0	0	0	0	1.50712	0.711785			CG13443	LINK	This gene is referred to in FlyBase by the symbol Dmel\CG13443 (FBgn0034548). It is a protein_coding_gene from Dmel. It has one annotated transcript and one polypeptide. Gene sequence location is 2R:20773687..20775364. Its molecular function is described by: . It is involved in the biological process described with: . 2 alleles are reported. No phenotypic data is available. The phenotypic class o…
FBgn0038204	0	1.362	0	0	0	0	1.50712	0.711785			CG14357	LINK	This gene is referred to in FlyBase by the symbol Dmel\CG14357 (FBgn0038204). It is a protein_coding_gene from Dmel. It has one annotated transcript and one polypeptide. Gene sequence location is 3R:14111151..14112166. Its molecular function is described by: . It is involved in the biological process described with: . 6 alleles are reported. No phenotypic data is available. The phenotypic class o…
FBgn0030167	0	1	0	0	0	0	1.50712	0.711785			CG15252	LINK	This gene is referred to in FlyBase by the symbol Dmel\CG15252 (FBgn0030167). It is a protein_coding_gene from Dmel. It has 2 annotated transcripts and 2 polypeptides (all unique). Gene sequence location is X:9978153..9980564. Its molecular function is unknown. The biological processes in which it is involved are not known. 4 alleles are reported. No phenotypic data is available. The phenotypic c…
FBgn0034131	0	1	0	0	0	0	1.50712	0.711785			CG15712	LINK	This gene is referred to in FlyBase by the symbol Dmel\CG15712 (FBgn0034131). It is a protein_coding_gene from Dmel. It has one annotated transcript and one polypeptide. Gene sequence location is 2R:16484841..16485552. Its molecular function is described by: . It is involved in the biological process described with: . 3 alleles are reported. No phenotypic data is available. The phenotypic class o…
FBgn0052182	0	1.009	0	0	0	0	1.50712	0.711785			CG32182	LINK	This gene is referred to in FlyBase by the symbol Dmel\CG32182 (FBgn0052182). It is a protein_coding_gene from Dmel. It has one annotated transcript and one polypeptide. Gene sequence location is 3L:17758112..17759553. Its molecular function is described by: . It is involved in the biological process described with: . 4 alleles are reported. No phenotypic data is available. The phenotypic class o…
FBgn0038727	0	1	0	0	0	0	1.50712	0.711785			CG7432	LINK	This gene is referred to in FlyBase by the symbol Dmel\CG7432 (FBgn0038727). It is a protein_coding_gene from Dmel. It has one annotated transcript and one polypeptide. Gene sequence location is 3R:19665007..19670827. Its molecular function is described by: serine-type endopeptidase activity. It is involved in the biological process described with: proteolysis. 5 alleles are reported. No phenotyp…
FBgn0045470	0	1	0	0	0	0	1.50712	0.711785			Gr93b	LINK	The gene Gustatory receptor 93b is referred to in FlyBase by the symbol Dmel\Gr93b (CG31336, FBgn0045470). It is a protein_coding_gene from Dmel. It has one annotated transcript and one polypeptide. Gene sequence location is 3R:21842521..21843765. Its molecular function is described by: taste receptor activity. It is involved in the biological process described with: sensory perception of taste. …
FBgn0053459	0	1	0	0	0	0	1.50712	0.711785			CG33459	LINK	This gene is referred to in FlyBase by the symbol Dmel\CG33459 (FBgn0053459). It is a protein_coding_gene from Dmel. It has one annotated transcript and one polypeptide. Gene sequence location is 2R:16488053..16489182. Its molecular function is described by: serine-type endopeptidase activity. It is involved in the biological process described with: proteolysis. 2 alleles are reported. No phenoty…
FBgn0259149	0	1	0	0	0	0	1.50712	0.711785			CG42264	LINK	This gene is referred to in FlyBase by the symbol Dmel\CG42264 (FBgn0259149). It is a protein_coding_gene from Dmel. It has 2 annotated transcripts and 2 polypeptides (all unique). Gene sequence location is X:5773023..5776647. Its molecular function is described by: zinc ion binding; metallocarboxypeptidase activity. It is involved in the biological process described with: proteolysis. 5 alleles …
FBgn0003015	0	1	0	0	0	0	1.50712	0.711785			osk	LINK	The gene oskar is referred to in FlyBase by the symbol Dmel\osk (CG10901, FBgn0003015). It is a protein_coding_gene from Dmel. It has 2 annotated transcripts and 2 polypeptides (all unique). Gene sequence location is 3R:8935126..8938395. Its molecular function is described by: mRNA binding. It is involved in the biological process described with 19 unique terms, many of which group under: respons…
FBgn0039676	0	1.207	0	0	0	0	1.50712	0.711785			ppk20	LINK	The gene pickpocket 20 is referred to in FlyBase by the symbol Dmel\ppk20 (CG7577, FBgn0039676). It is a protein_coding_gene from Dmel. It has 3 annotated transcripts and 3 polypeptides (all unique). Gene sequence location is 3R:29666814..29668877. Its molecular function is described by: sodium channel activity; ligand-gated sodium channel activity. It is involved in the biological process descri…
FBgn0030417	7.072	16.346	1	2	2.014	7.179	1.50259	0.101641	0.999974		CG15725	LINK	This gene is referred to in FlyBase by the symbol Dmel\CG15725 (FBgn0030417). It is a protein_coding_gene from Dmel. It has one annotated transcript and one polypeptide. Gene sequence location is X:12705854..12708841. Its molecular function is described by: RNA polymerase II cis-regulatory region sequence-specific DNA binding; DNA-binding transcription factor activity. It is involved in the biolo…
FBgn0260455	82.791	133.782	166.012	74.717	62.07	65.021	1.48476	6.88241e-07	0.000860164	UP	CG10332	LINK	This gene is referred to in FlyBase by the symbol Dmel\CG10332 (FBgn0260455). It is a protein_coding_gene from Dmel. It has one annotated transcript and one polypeptide. Gene sequence location is 2R:23600914..23601773. Its molecular function is unknown. The biological processes in which it is involved are not known. 2 alleles are reported. No phenotypic data is available. No phenotypic class data…
FBgn0032639	0	3	1	2	0	0	1.48082	0.49591			CG18563	LINK	This gene is referred to in FlyBase by the symbol Dmel\CG18563 (FBgn0032639). It is a protein_coding_gene from Dmel. It has one annotated transcript and one polypeptide. Gene sequence location is 2L:17456670..17458044. Its molecular function is described by: serine-type endopeptidase activity. It is involved in the biological process described with: proteolysis. 6 alleles are reported. No phenoty…
FBgn0030181	7	30.276	7	4	8	8.055	1.47617	0.0278454	0.999974		CG12645	LINK	This gene is referred to in FlyBase by the symbol Dmel\CG12645 (FBgn0030181). It is a protein_coding_gene from Dmel. It has 2 annotated transcripts and 2 polypeptides (all unique). Gene sequence location is X:10153612..10155009. Its molecular function is described by: . The biological processes in which it is involved are not known. 3 alleles are reported. No phenotypic data is available. The phe…
FBgn0263512	1	8	2	1	0	4	1.4696	0.261238	0.999974		Vsx2	LINK	The gene Visual system homeobox 2 is referred to in FlyBase by the symbol Dmel\Vsx2 (CG33980, FBgn0263512). It is a protein_coding_gene from Dmel. It has 2 annotated transcripts and 2 polypeptides (all unique). Gene sequence location is X:5528927..5560183. Its molecular function is described by: sequence-specific DNA binding; DNA-binding transcription factor activity. It is involved in the biolog…
FBgn0039192	1.004	0	2.002	2.006	0	0	1.46501	0.498193			CG17784	LINK	This gene is referred to in FlyBase by the symbol Dmel\CG17784 (FBgn0039192). It is a protein_coding_gene from Dmel. It has one annotated transcript and one polypeptide. Gene sequence location is 3R:24364081..24364980. Its molecular function is unknown. The biological processes in which it is involved are not known. 5 alleles are reported. No phenotypic data is available. The phenotypic class of …
FBgn0041232	0	3	3	1	0	2	1.46415	0.377029			CG32395	LINK	This gene is referred to in FlyBase by the symbol Dmel\CG32395 (FBgn0041232). It is a protein_coding_gene from Dmel. It has one annotated transcript and one polypeptide. Gene sequence location is 3L:6666638..6667816. Its molecular function is unknown. It is involved in the biological process described with: sensory perception of taste. One allele is reported. No phenotypic data is available. The …
FBgn0038132	0	3	3	1	0	2	1.46415	0.377029			apn	LINK	The gene apnoia is referred to in FlyBase by the symbol Dmel\apn (CG15887, FBgn0038132). It is a protein_coding_gene from Dmel. It has one annotated transcript and one polypeptide. Gene sequence location is 3R:13287655..13288813. Its molecular function is described by: . It is involved in the biological process described with 6 unique terms, many of which group under: respiratory system developme…
FBgn0266405	17	23	57	28	23.993	4	1.46323	0.00971701	0.923472		CG45045	LINK	This gene is referred to in FlyBase by the symbol Dmel\CG45045 (FBgn0266405). It is a protein_coding_gene from Dmel. It has one annotated transcript and one polypeptide. Gene sequence location is 3R:17667572..17667825. Its molecular function is unknown. The biological processes in which it is involved are not known. No alleles are reported.
FBgn0267236	6	7.213	2	4	3	1.002	1.45847	0.144147	0.999974		CG45676	LINK	This gene is referred to in FlyBase by the symbol Dmel\CG45676 (FBgn0267236). It is a protein_coding_gene from Dmel. It has one annotated transcript and one polypeptide. Gene sequence location is 3R:11418885..11419295. Its molecular function is described by: . It is involved in the biological process described with: . One allele is reported. No phenotypic data is available. No phenotypic class da…
FBgn0033389	4.118	2.747	3	1.009	2.984	2.792	1.44985	0.230706	0.999974		Rad51D	LINK	The gene Rad51 recombinase D is referred to in FlyBase by the symbol Dmel\Rad51D (CG2412, FBgn0033389). It is a protein_coding_gene from Dmel. It has one annotated transcript and one polypeptide. Gene sequence location is 2R:9165632..9167670. Its molecular function is described by: DNA-dependent ATPase activity; single-stranded DNA binding; recombinase activity; four-way junction DNA binding. It …
FBgn0263772	10	30.001	11	7	8	10	1.44931	0.0125059	0.999974		CG43689	LINK	This gene is referred to in FlyBase by the symbol Dmel\CG43689 (FBgn0263772). It is a protein_coding_gene from Dmel. It has 7 annotated transcripts and 7 polypeptides (6 unique). Gene sequence location is X:4075743..4092237. Its molecular function is described by: zinc ion binding; DNA-binding transcription factor activity, RNA polymerase II-specific; DNA-binding transcription repressor activity,…
FBgn0267489	4	4	3	2	1.004	3	1.44337	0.194999	0.999974		PRY	LINK	The gene polycystine-related-Y is referred to in FlyBase by the symbol Dmel\PRY (CG45787, FBgn0267489). It is a protein_coding_gene from Dmel. It has one annotated transcript and one polypeptide. Gene sequence location is Y:146092..192020. Its molecular function is described by: . It is involved in the biological process described with: . 7 alleles are reported. No phenotypic data is available. N…
FBgn0025334	3	5.014	0	1	0	3	1.44214	0.329757	0.999974		PHDP	LINK	The gene Putative homeodomain protein is referred to in FlyBase by the symbol Dmel\PHDP (CG11182, FBgn0025334). It is a protein_coding_gene from Dmel. It has one annotated transcript and one polypeptide. Gene sequence location is 2R:23883136..23884440. Its molecular function is described by: RNA polymerase II transcription regulatory region sequence-specific DNA binding; DNA-binding transcription…
FBgn0005664	11	32	4.072	10	8	5	1.43631	0.0284681	0.999974		Crys	LINK	The gene Crystallin is referred to in FlyBase by the symbol Dmel\Crys (CG16963, FBgn0005664). It is a protein_coding_gene from Dmel. It has 2 annotated transcripts and 2 polypeptides (1 unique). Gene sequence location is 2L:11944129..11947131. Its molecular function is described by: structural constituent of cuticle; calcium ion binding; structural constituent of eye lens. It is involved in the b…
FBgn0053668	20.006	17.276	32.562	29.274	7.044	6.07	1.43536	0.0108594	0.942507		CG33668	LINK	This gene is referred to in FlyBase by the symbol Dmel\CG33668 (FBgn0053668). It is a protein_coding_gene from Dmel. It has one annotated transcript and one polypeptide. Gene sequence location is X:6418760..6419434. Its molecular function is described by: . It is involved in the biological process described with: . No alleles are reported. Summary of modENCODE Temporal Expression Profile: Tempora…
FBgn0044050	2	3	1	0	1	2	1.43383	0.357552	0.999974		Ilp3	LINK	The gene Insulin-like peptide 3 is referred to in FlyBase by the symbol Dmel\Ilp3 (CG14167, FBgn0044050). It is a protein_coding_gene from Dmel. It has one annotated transcript and one polypeptide. Gene sequence location is 3L:9801298..9802120. Its molecular function is described by: insulin receptor binding; hormone activity. It is involved in the biological process described with 6 unique terms…
FBgn0044050	2	3	1	0	1	2	1.43383	0.357552	0.999974		Ilp3	LINK	The gene Insulin-like peptide 3 is referred to in FlyBase by the symbol Dmel\Ilp3 (CG14167, FBgn0044050). It is a protein_coding_gene from Dmel. It has one annotated transcript and one polypeptide. Gene sequence location is 3L:9801298..9802120. Its molecular function is described by: insulin receptor binding; hormone activity. It is involved in the biological process described with 6 unique terms…
FBgn0044050	2	3	1	0	1	2	1.43383	0.357552	0.999974		Ilp3	LINK	The gene Insulin-like peptide 3 is referred to in FlyBase by the symbol Dmel\Ilp3 (CG14167, FBgn0044050). It is a protein_coding_gene from Dmel. It has one annotated transcript and one polypeptide. Gene sequence location is 3L:9801298..9802120. Its molecular function is described by: insulin receptor binding; hormone activity. It is involved in the biological process described with 6 unique terms…
FBgn0044050	2	3	1	0	1	2	1.43383	0.357552	0.999974		Ilp3	LINK	The gene Insulin-like peptide 3 is referred to in FlyBase by the symbol Dmel\Ilp3 (CG14167, FBgn0044050). It is a protein_coding_gene from Dmel. It has one annotated transcript and one polypeptide. Gene sequence location is 3L:9801298..9802120. Its molecular function is described by: insulin receptor binding; hormone activity. It is involved in the biological process described with 6 unique terms…
FBgn0036411	0	4	2	2	1	0	1.43184	0.398549			Sox21a	LINK	The gene Sox21a is referred to in FlyBase by the symbol Dmel\Sox21a (CG7345, FBgn0036411). It is a protein_coding_gene from Dmel. It has 2 annotated transcripts and 2 polypeptides (all unique). Gene sequence location is 3L:14103481..14108118. Its molecular function is described by: RNA polymerase II cis-regulatory region sequence-specific DNA binding; DNA-binding transcription factor activity, RN…
FBgn0040290	4	5	4	2	2	3	1.43037	0.162415	0.999974		RecQ4	LINK	The gene RecQ4 helicase is referred to in FlyBase by the symbol Dmel\RecQ4 (CG7487, FBgn0040290). It is a protein_coding_gene from Dmel. It has one annotated transcript and one polypeptide. Gene sequence location is 3L:8170640..8175978. Its molecular function is described by 8 unique terms, many of which group under: pyrophosphatase activity; catalytic activity; hydrolase activity, acting on acid…
FBgn0030598	1.141	1	0	1	0	0	1.41718	0.59459			CG9503	LINK	This gene is referred to in FlyBase by the symbol Dmel\CG9503 (FBgn0030598). It is a protein_coding_gene from Dmel. It has one annotated transcript and one polypeptide. Gene sequence location is X:14919252..14923493. Its molecular function is described by: oxidoreductase activity; oxidoreductase activity, acting on CH-OH group of donors; flavin adenine dinucleotide binding. It is involved in the …
FBgn0086265	1	1	0	1	0	0	1.41718	0.59459			psd	LINK	The gene palisade is referred to in FlyBase by the symbol Dmel\psd (CG9050, FBgn0086265). It is a protein_coding_gene from Dmel. It has 2 annotated transcripts and 2 polypeptides (1 unique). Gene sequence location is 2L:5963087..5964951. Its molecular function is unknown. It is involved in the biological process described with: follicle cell microvillus organization; vitelline membrane formation …
FBgn0026756	1.007	1.002	0	1	0	0	1.41718	0.59459			Ugt37A1	LINK	The gene UDP-glycosyltransferase family 37 member A1 is referred to in FlyBase by the symbol Dmel\Ugt37A1 (CG11012, FBgn0026756). It is a protein_coding_gene from Dmel. It has one annotated transcript and one polypeptide. Gene sequence location is 2L:20372409..20374104. Its molecular function is described by: transferase activity, transferring hexosyl groups; UDP-glycosyltransferase activity. It …
FBgn0026756	1.007	1.002	0	1	0	0	1.41718	0.59459			Ugt37A1	LINK	The gene UDP-glycosyltransferase family 37 member A1 is referred to in FlyBase by the symbol Dmel\Ugt37A1 (CG11012, FBgn0026756). It is a protein_coding_gene from Dmel. It has one annotated transcript and one polypeptide. Gene sequence location is 2L:20372409..20374104. Its molecular function is described by: transferase activity, transferring hexosyl groups; UDP-glycosyltransferase activity. It …
FBgn0026756	1.007	1.002	0	1	0	0	1.41718	0.59459			Ugt37A1	LINK	The gene UDP-glycosyltransferase family 37 member A1 is referred to in FlyBase by the symbol Dmel\Ugt37A1 (CG11012, FBgn0026756). It is a protein_coding_gene from Dmel. It has one annotated transcript and one polypeptide. Gene sequence location is 2L:20372409..20374104. Its molecular function is described by: transferase activity, transferring hexosyl groups; UDP-glycosyltransferase activity. It …
FBgn0026756	1.007	1.002	0	1	0	0	1.41718	0.59459			Ugt37A1	LINK	The gene UDP-glycosyltransferase family 37 member A1 is referred to in FlyBase by the symbol Dmel\Ugt37A1 (CG11012, FBgn0026756). It is a protein_coding_gene from Dmel. It has one annotated transcript and one polypeptide. Gene sequence location is 2L:20372409..20374104. Its molecular function is described by: transferase activity, transferring hexosyl groups; UDP-glycosyltransferase activity. It …
FBgn0026756	1.007	1.002	0	1	0	0	1.41718	0.59459			Ugt37A1	LINK	The gene UDP-glycosyltransferase family 37 member A1 is referred to in FlyBase by the symbol Dmel\Ugt37A1 (CG11012, FBgn0026756). It is a protein_coding_gene from Dmel. It has one annotated transcript and one polypeptide. Gene sequence location is 2L:20372409..20374104. Its molecular function is described by: transferase activity, transferring hexosyl groups; UDP-glycosyltransferase activity. It …
FBgn0026756	1.007	1.002	0	1	0	0	1.41718	0.59459			Ugt37A1	LINK	The gene UDP-glycosyltransferase family 37 member A1 is referred to in FlyBase by the symbol Dmel\Ugt37A1 (CG11012, FBgn0026756). It is a protein_coding_gene from Dmel. It has one annotated transcript and one polypeptide. Gene sequence location is 2L:20372409..20374104. Its molecular function is described by: transferase activity, transferring hexosyl groups; UDP-glycosyltransferase activity. It …
FBgn0026756	1.007	1.002	0	1	0	0	1.41718	0.59459			Ugt37A1	LINK	The gene UDP-glycosyltransferase family 37 member A1 is referred to in FlyBase by the symbol Dmel\Ugt37A1 (CG11012, FBgn0026756). It is a protein_coding_gene from Dmel. It has one annotated transcript and one polypeptide. Gene sequence location is 2L:20372409..20374104. Its molecular function is described by: transferase activity, transferring hexosyl groups; UDP-glycosyltransferase activity. It …
FBgn0261402	1	1.701	0	0	0	1	1.41663	0.587868			Ir75b	LINK	The gene Ionotropic receptor 75b is referred to in FlyBase by the symbol Dmel\Ir75b (CG42643, FBgn0261402). It is a protein_coding_gene from Dmel. It has one annotated transcript and one polypeptide. Gene sequence location is 3L:17818073..17820193. Its molecular function is described by: ionotropic glutamate receptor activity; ligand-gated ion channel activity. It is involved in the biological pr…
FBgn0004034	1	1	0	0	0	1	1.41663	0.587868			y	LINK	The gene yellow is referred to in FlyBase by the symbol Dmel\y (CG3757, FBgn0004034). It is a protein_coding_gene from Dmel. It has one annotated transcript and one polypeptide. Gene sequence location is X:356509..361245. Its molecular function is unknown. It is involved in the biological process described with 7 unique terms, many of which group under: pigmentation; developmental pigmentation; b…
FBgn0020640	1	1	0	0	1	0	1.41646	0.585805			Lcp65Ae	LINK	The gene Lcp65Ae is referred to in FlyBase by the symbol Dmel\Lcp65Ae (CG10529, FBgn0020640). It is a protein_coding_gene from Dmel. It has one annotated transcript and one polypeptide. Gene sequence location is 3L:6137583..6138118. Its molecular function is described by: structural constituent of chitin-based larval cuticle; structural constituent of cuticle. It is involved in the biological pro…
FBgn0035312	1	1	0	0	1	0	1.41646	0.585805			CG15820	LINK	This gene is referred to in FlyBase by the symbol Dmel\CG15820 (FBgn0035312). It is a protein_coding_gene from Dmel. It has one annotated transcript and one polypeptide. Gene sequence location is 3L:2172995..2174332. Its molecular function is described by: hydrolase activity. It is involved in the biological process described with: . 3 alleles are reported. No phenotypic data is available. The ph…
FBgn0265001	1	1.002	0	0	1	0	1.41646	0.585805			ppk18	LINK	The gene pickpocket 18 is referred to in FlyBase by the symbol Dmel\ppk18 (CG44152, FBgn0265001). It is a protein_coding_gene from Dmel. It has one annotated transcript and one polypeptide. Gene sequence location is 2L:9765357..9770996. Its molecular function is described by: ligand-gated sodium channel activity; sodium channel activity. It is involved in the biological process described with: so…
FBgn0038315	1	1.008	0	0	1.011	0	1.41646	0.585805			CG14866	LINK	This gene is referred to in FlyBase by the symbol Dmel\CG14866 (FBgn0038315). It is a protein_coding_gene from Dmel. It has 2 annotated transcripts and 2 polypeptides (all unique). Gene sequence location is 3R:15316471..15318285. Its molecular function is described by: carbohydrate binding. The biological processes in which it is involved are not known. 2 alleles are reported. No phenotypic data …
FBgn0033277	1	3	0	1	0	1	1.41568	0.485087			CG14760	LINK	This gene is referred to in FlyBase by the symbol Dmel\CG14760 (FBgn0033277). It is a protein_coding_gene from Dmel. It has one annotated transcript and one polypeptide. Gene sequence location is 2R:8254223..8256931. Its molecular function is described by: serine-type endopeptidase activity. It is involved in the biological process described with: proteolysis. 5 alleles are reported. No phenotypi…
FBgn0265836	2	2	0	0	2	0	1.41528	0.478902			CG44625	LINK	This gene is referred to in FlyBase by the symbol Dmel\CG44625 (FBgn0265836). It is a protein_coding_gene from Dmel. It has one annotated transcript and one polypeptide. Gene sequence location is 2R:20235545..20235945. Its molecular function is described by: . It is involved in the biological process described with: . No alleles are reported.
FBgn0037841	7	6.018	3.085	3	1.981	5.076	1.40933	0.13953	0.999974		CG4565	LINK	This gene is referred to in FlyBase by the symbol Dmel\CG4565 (FBgn0037841). It is a protein_coding_gene from Dmel. It has one annotated transcript and one polypeptide. Gene sequence location is 3R:10852724..10853644. Its molecular function is described by: zinc ion binding; histone methyltransferase activity (H3-K36 specific). It is involved in the biological process described with: histone meth…
FBgn0036880	5	13	2	3	3	4	1.40649	0.119706	0.999974		Cpr76Bc	LINK	The gene Cuticular protein 76Bc is referred to in FlyBase by the symbol Dmel\Cpr76Bc (CG9295, FBgn0036880). It is a protein_coding_gene from Dmel. It has 2 annotated transcripts and 2 polypeptides (1 unique). Gene sequence location is 3L:19520945..19527272. Its molecular function is described by: structural constituent of cuticle; structural constituent of chitin-based larval cuticle. It is invol…
FBgn0036585	3	4	5	4	0	3	1.40474	0.20244	0.999974		CG13071	LINK	This gene is referred to in FlyBase by the symbol Dmel\CG13071 (FBgn0036585). It is a protein_coding_gene from Dmel. It has one annotated transcript and one polypeptide. Gene sequence location is 3L:16262740..16263247. Its molecular function is unknown. The biological processes in which it is involved are not known. 5 alleles are reported. No phenotypic data is available. The phenotypic class of …
FBgn0013772	126	286.806	95.024	112	98	53	1.40298	2.90075e-06	0.00258954	UP	Cyp6a8	LINK	The gene Cytochrome P450-6a8 is referred to in FlyBase by the symbol Dmel\Cyp6a8 (CG10248, FBgn0013772). It is a protein_coding_gene from Dmel. It has one annotated transcript and one polypeptide. Gene sequence location is 2R:14887171..14889010. Its molecular function is described by: heme binding; electron transfer activity; alkane 1-monooxygenase activity; iron ion binding. It is involved in th…
FBgn0031719	2	0	3	0	1	2	1.39123	0.399733	0.999974		CG18269	LINK	This gene is referred to in FlyBase by the symbol Dmel\CG18269 (FBgn0031719). It is a protein_coding_gene from Dmel. It has one annotated transcript and one polypeptide. Gene sequence location is 2L:5551838..5552756. Its molecular function is unknown. The biological processes in which it is involved are not known. 2 alleles are reported. No phenotypic data is available. The phenotypic class of al…
FBgn0035057	2	1	2	1	0	2	1.38804	0.388807			CG3880	LINK	This gene is referred to in FlyBase by the symbol Dmel\CG3880 (FBgn0035057). It is a protein_coding_gene from Dmel. It has one annotated transcript and one polypeptide. Gene sequence location is 2R:24760664..24762605. Its molecular function is described by: . It is involved in the biological process described with: . 2 alleles are reported. No phenotypic data is available. The phenotypic class of…
FBgn0262001	1.194	2	1	0	2.127	0	1.38498	0.472954			CG42819	LINK	This gene is referred to in FlyBase by the symbol Dmel\CG42819 (FBgn0262001). It is a protein_coding_gene from Dmel. It has one annotated transcript and one polypeptide. Gene sequence location is 2L:8388728..8389331. Its molecular function is unknown. The biological processes in which it is involved are not known. No alleles are reported.
FBgn0265577	3	13.328	11	4	9	1	1.38496	0.0915191	0.999974		IBIN	LINK	The gene Induced by Infection is referred to in FlyBase by the symbol Dmel\IBIN (CG44404, FBgn0265577). It is a protein_coding_gene from Dmel. It has one annotated transcript and one polypeptide. Gene sequence location is 2R:17671068..17671295. Its molecular function is unknown. The biological processes in which it is involved are not known. One allele is reported. The phenotype of this allele ma…
FBgn0039523	0	6.041	4	1	1.001	3.014	1.37482	0.291731	0.999974		CG12885	LINK	This gene is referred to in FlyBase by the symbol Dmel\CG12885 (FBgn0039523). It is a protein_coding_gene from Dmel. It has 2 annotated transcripts and 2 polypeptides (all unique). Gene sequence location is 3R:27520866..27533934. Its molecular function is unknown. The biological processes in which it is involved are not known. 6 alleles are reported. No phenotypic data is available. The phenotypi…
FBgn0011706	3	10	2	5	2	1	1.36811	0.188887	0.999974		rpr	LINK	The gene reaper is referred to in FlyBase by the symbol Dmel\rpr (CG4319, FBgn0011706). It is a protein_coding_gene from Dmel. It has one annotated transcript and one polypeptide. Gene sequence location is 3L:18397535..18398435. Its molecular function is described by: ubiquitin conjugating enzyme binding; phospholipid binding; ubiquitin protein ligase binding; protein homodimerization activity. I…
FBgn0011706	3	10	2	5	2	1	1.36811	0.188887	0.999974		rpr	LINK	The gene reaper is referred to in FlyBase by the symbol Dmel\rpr (CG4319, FBgn0011706). It is a protein_coding_gene from Dmel. It has one annotated transcript and one polypeptide. Gene sequence location is 3L:18397535..18398435. Its molecular function is described by: ubiquitin conjugating enzyme binding; phospholipid binding; ubiquitin protein ligase binding; protein homodimerization activity. I…
FBgn0034407	71	217.394	209.703	55	189	10	1.36409	0.221201	0.999974		DptB	LINK	The gene Diptericin B is referred to in FlyBase by the symbol Dmel\DptB (CG10794, FBgn0034407). It is a protein_coding_gene from Dmel. It has one annotated transcript and one polypeptide. Gene sequence location is 2R:18867391..18867895. Its molecular function is unknown. It is involved in the biological process described with: humoral immune response; antibacterial humoral response; defense respo…
FBgn0036440	84.018	113.575	99.008	71	32	69.312	1.3616	7.28644e-06	0.00535682	UP	CG17177	LINK	This gene is referred to in FlyBase by the symbol Dmel\CG17177 (FBgn0036440). It is a protein_coding_gene from Dmel. It has 2 annotated transcripts and 2 polypeptides (all unique). Gene sequence location is 3L:14697313..14701678. Its molecular function is unknown. The biological processes in which it is involved are not known. 3 alleles are reported. No phenotypic data is available. The phenotypi…
FBgn0032391	6.729	10.225	2.328	5.246	2.397	3.542	1.35954	0.138035	0.999974		escl	LINK	The gene escl is referred to in FlyBase by the symbol Dmel\escl (CG5202, FBgn0032391). It is a protein_coding_gene from Dmel. It has 2 annotated transcripts and 2 polypeptides (1 unique). Gene sequence location is 2L:11990927..11992848. Its molecular function is described by: nucleosome binding; histone methyltransferase activity; histone methyltransferase activity (H3-K27 specific). It is involv…
FBgn0031533	2	3	10	4	4	1	1.35756	0.177706	0.999974		CG2772	LINK	This gene is referred to in FlyBase by the symbol Dmel\CG2772 (FBgn0031533). It is a protein_coding_gene from Dmel. It has one annotated transcript and one polypeptide. Gene sequence location is 2L:3445992..3447589. Its molecular function is described by: triglyceride lipase activity; sterol esterase activity. It is involved in the biological process described with: lipid metabolic process. 5 all…
FBgn0031747	2	0	1	1	1	0	1.35573	0.501618			CG9021	LINK	This gene is referred to in FlyBase by the symbol Dmel\CG9021 (FBgn0031747). It is a protein_coding_gene from Dmel. It has 2 annotated transcripts and 2 polypeptides (1 unique). Gene sequence location is 2L:5903178..5904689. Its molecular function is unknown. The biological processes in which it is involved are not known. 3 alleles are reported. No phenotypic data is available. The phenotypic cla…
FBgn0085342	58.624	67.115	70	59.431	0	62.962	1.35296	0.367171	0.999974		CG34313	LINK	This gene is referred to in FlyBase by the symbol Dmel\CG34313 (FBgn0085342). It is a protein_coding_gene from Dmel. It has one annotated transcript and one polypeptide. Gene sequence location is 2L:16879517..16886319. Its molecular function is described by: . It is involved in the biological process described with: . 4 alleles are reported. No phenotypic data is available. No phenotypic class da…
FBgn0035468	0	1	1	0	1	0	1.35234	0.609276			Gr63a	LINK	The gene Gustatory receptor 63a is referred to in FlyBase by the symbol Dmel\Gr63a (CG14979, FBgn0035468). It is a protein_coding_gene from Dmel. It has one annotated transcript and one polypeptide. Gene sequence location is 3L:3894999..3896603. Its molecular function is described by: taste receptor activity; olfactory receptor activity. It is involved in the biological process described with: de…
FBgn0038751	0	1.008	1	0	1	0	1.35234	0.609276			CG4770	LINK	This gene is referred to in FlyBase by the symbol Dmel\CG4770 (FBgn0038751). It is a protein_coding_gene from Dmel. It has one annotated transcript and one polypeptide. Gene sequence location is 3R:19918507..19920584. Its molecular function is described by: fatty-acyl-CoA reductase (alcohol-forming) activity. It is involved in the biological process described with: long-chain fatty-acyl-CoA metab…
FBgn0034856	0	1.001	1	0	1.007	0	1.35234	0.609276			yellow-d2	LINK	The gene yellow-d2 is referred to in FlyBase by the symbol Dmel\yellow-d2 (CG9891, FBgn0034856). It is a protein_coding_gene from Dmel. It has one annotated transcript and one polypeptide. Gene sequence location is 2R:23381197..23382591. Its molecular function is unknown. The biological processes in which it is involved are not known. 2 alleles are reported. No phenotypic data is available. The p…
FBgn0262607	0	1	1	0	0	1	1.35207	0.611517			CG43133	LINK	This gene is referred to in FlyBase by the symbol Dmel\CG43133 (FBgn0262607). It is a protein_coding_gene from Dmel. It has one annotated transcript and one polypeptide. Gene sequence location is X:18129585..18130178. Its molecular function is described by: . It is involved in the biological process described with: . No alleles are reported.
FBgn0041252	0	1	1	0	0	1	1.35207	0.611517			Femcoat	LINK	The gene Femcoat is referred to in FlyBase by the symbol Dmel\Femcoat (CG15573, FBgn0041252). It is a protein_coding_gene from Dmel. It has one annotated transcript and one polypeptide. Gene sequence location is X:4241887..4242826. Its molecular function is described by: structural constituent of egg chorion. It is involved in the biological process described with: eggshell chorion assembly. 6 al…
FBgn0085213	0	1	1	1	0	0	1.35122	0.618824			CG34184	LINK	This gene is referred to in FlyBase by the symbol Dmel\CG34184 (FBgn0085213). It is a protein_coding_gene from Dmel. It has one annotated transcript and one polypeptide. Gene sequence location is 2R:14365656..14366658. Its molecular function is described by: . It is involved in the biological process described with: . 2 alleles are reported. No phenotypic data is available. No phenotypic class da…
FBgn0033732	0	1	1	1	0	0	1.35122	0.618824			CG13157	LINK	This gene is referred to in FlyBase by the symbol Dmel\CG13157 (FBgn0033732). It is a protein_coding_gene from Dmel. It has one annotated transcript and one polypeptide. Gene sequence location is 2R:12416044..12418231. Its molecular function is unknown. The biological processes in which it is involved are not known. 2 alleles are reported. No phenotypic data is available. The phenotypic class of …
FBgn0040477	0	3	6	1	1	3	1.35096	0.307546	0.999974		cid	LINK	The gene centromere identifier is referred to in FlyBase by the symbol Dmel\cid (CG13329, FBgn0040477). It is a protein_coding_gene from Dmel. It has one annotated transcript and one polypeptide. Gene sequence location is 2R:13485617..13486631. Its molecular function is described by: DNA binding; protein heterodimerization activity; protein binding. It is involved in the biological process descri…
FBgn0032533	20.762	0	37.001	47.786	0	0	1.34861	0.709204	0.999974		CG16888	LINK	This gene is referred to in FlyBase by the symbol Dmel\CG16888 (FBgn0032533). It is a protein_coding_gene from Dmel. It has one annotated transcript and one polypeptide. Gene sequence location is 2L:13812700..13813256. Its molecular function is unknown. The biological processes in which it is involved are not known. 3 alleles are reported. No phenotypic data is available. The phenotypic class of …
FBgn0040697	0	3.696	1.127	1.209	1.249	0	1.34854	0.50806			Teh3	LINK	The gene tipE homolog 3 is referred to in FlyBase by the symbol Dmel\Teh3 (CG18676, FBgn0040697). It is a protein_coding_gene from Dmel. It has one annotated transcript and one polypeptide. Gene sequence location is 3L:4182645..4184663. Its molecular function is described by: sodium channel regulator activity. It is involved in the biological process described with: regulation of sodium ion trans…
FBgn0004514	7	8	4	5	4	2	1.34694	0.116168	0.999974		Oct-TyrR	LINK	The gene Octopamine-Tyramine receptor is referred to in FlyBase by the symbol Dmel\Oct-TyrR (CG7485, FBgn0004514). It is a protein_coding_gene from Dmel. It has 2 annotated transcripts and 2 polypeptides (1 unique). Gene sequence location is 3L:22035003..22065279. Its molecular function is described by: G protein-coupled receptor activity; octopamine receptor activity; G protein-coupled amine rec…
FBgn0263084	13	33	10	11	9	10	1.34561	0.0136014	0.999974		HP1Lcsd	LINK	The gene Heterochromatin Protein 1L chromoshadow domain is referred to in FlyBase by the symbol Dmel\HP1Lcsd (CG43352, FBgn0263084). It is a protein_coding_gene from Dmel. It has one annotated transcript and one polypeptide. Gene sequence location is 2R:23313017..23313854. Its molecular function is described by: chromatin binding. It is involved in the biological process described with: chromosom…
FBgn0038530	3	3	6	1	2	4	1.33683	0.212135	0.999974		AttD	LINK	The gene Attacin-D is referred to in FlyBase by the symbol Dmel\AttD (CG7629, FBgn0038530). It is a protein_coding_gene from Dmel. It has one annotated transcript and one polypeptide. Gene sequence location is 3R:17625268..17626086. Its molecular function is unknown. It is involved in the biological process described with: antibacterial humoral response; response to wounding; defense response to …
FBgn0036565	6	4.001	3	4	2.027	2	1.33468	0.185187	0.999974		CG5235	LINK	This gene is referred to in FlyBase by the symbol Dmel\CG5235 (FBgn0036565). It is a protein_coding_gene from Dmel. It has 2 annotated transcripts and 2 polypeptides (1 unique). Gene sequence location is 3L:16087627..16090392. Its molecular function is described by: oxidoreductase activity, acting on paired donors, with incorporation or reduction of molecular oxygen, reduced ascorbate as one dono…
FBgn0265578	2.193	1.088	3.297	3.077	0	1.085	1.33133	0.369852	0.999974		CG44405	LINK	This gene is referred to in FlyBase by the symbol Dmel\CG44405 (FBgn0265578). It is a protein_coding_gene from Dmel. It has one annotated transcript and one polypeptide. Gene sequence location is 2L:16340392..16342324. Its molecular function is described by: . It is involved in the biological process described with: . No alleles are reported.
FBgn0050062	1	5	2	0	2.16	2.148	1.33104	0.341715	0.999974		CG30062	LINK	This gene is referred to in FlyBase by the symbol Dmel\CG30062 (FBgn0050062). It is a protein_coding_gene from Dmel. It has one annotated transcript and one polypeptide. Gene sequence location is 2R:13445700..13446309. Its molecular function is described by: lysozyme activity. It is involved in the biological process described with: defense response to Gram-negative bacterium. 4 alleles are repor…
FBgn0036057	56.138	57.551	76.399	57.717	23.224	38.322	1.31909	0.000238651	0.0693642		Hez	LINK	The gene Hezron is referred to in FlyBase by the symbol Dmel\Hez (CG14164, FBgn0036057). It is a protein_coding_gene from Dmel. It has 2 annotated transcripts and 2 polypeptides (1 unique). Gene sequence location is 3L:9893188..9894743. Its molecular function is described by: . The biological processes in which it is involved are not known. 6 alleles are reported. No phenotypic data is available.…
FBgn0038134	1	0	2	1	1	0	1.3152	0.517747			wntD	LINK	The gene wnt inhibitor of Dorsal is referred to in FlyBase by the symbol Dmel\wntD (CG8458, FBgn0038134). It is a protein_coding_gene from Dmel. It has one annotated transcript and one polypeptide. Gene sequence location is 3R:13292052..13293198. Its molecular function is described by: cytokine activity; frizzled binding. It is involved in the biological process described with 7 unique terms, man…
FBgn0038134	1	0	2	1	1	0	1.3152	0.517747			wntD	LINK	The gene wnt inhibitor of Dorsal is referred to in FlyBase by the symbol Dmel\wntD (CG8458, FBgn0038134). It is a protein_coding_gene from Dmel. It has one annotated transcript and one polypeptide. Gene sequence location is 3R:13292052..13293198. Its molecular function is described by: cytokine activity; frizzled binding. It is involved in the biological process described with 7 unique terms, man…
FBgn0030949	5	5	2	2	2	3	1.31481	0.214223	0.999974		Cyp308a1	LINK	The gene Cyp308a1 is referred to in FlyBase by the symbol Dmel\Cyp308a1 (CG6585, FBgn0030949). It is a protein_coding_gene from Dmel. It has one annotated transcript and one polypeptide. Gene sequence location is X:18709865..18711638. Its molecular function is described by: heme binding; oxidoreductase activity, acting on paired donors, with incorporation or reduction of molecular oxygen; iron io…
FBgn0051976	0	9.86	2.528	0	3.568	2.554	1.31455	0.337028	0.999974		ovm	LINK	The gene oven mitt is referred to in FlyBase by the symbol Dmel\ovm (CG31976, FBgn0051976). It is a protein_coding_gene from Dmel. It has 2 annotated transcripts and 2 polypeptides (1 unique). Gene sequence location is 2L:138384..140992. Its molecular function is described by: . The biological processes in which it is involved are not known. 3 alleles are reported. The phenotypes of these alleles…
FBgn0053468	1	5	5	1	3	2	1.31429	0.253983	0.999974		CG33468	LINK	This gene is referred to in FlyBase by the symbol Dmel\CG33468 (FBgn0053468). It is a protein_coding_gene from Dmel. It has one annotated transcript and one polypeptide. Gene sequence location is 2R:14606307..14606980. Its molecular function is described by: . It is involved in the biological process described with: . 8 alleles are reported. No phenotypic data is available. The phenotypic class o…
FBgn0052576	423.659	167.067	397.012	450.481	120.672	136.367	1.31136	0.0830136	0.999974		CG32576	LINK	This gene is referred to in FlyBase by the symbol Dmel\CG32576 (FBgn0052576). It is a protein_coding_gene from Dmel. It has 2 annotated transcripts and 2 polypeptides (all unique). Gene sequence location is X:16285953..16288533. Its molecular function is described by: . It is involved in the biological process described with: vesicle-mediated transport. 3 alleles are reported. The phenotypes of t…
FBgn0033789	56	109.383	72.415	67.378	39.398	33.478	1.30684	1.18393e-05	0.00778778	UP	CG13324	LINK	This gene is referred to in FlyBase by the symbol Dmel\CG13324 (FBgn0033789). It is a protein_coding_gene from Dmel. It has one annotated transcript and one polypeptide. Gene sequence location is 2R:13049146..13049656. Its molecular function is unknown. The biological processes in which it is involved are not known. One allele is reported. No phenotypic data is available. The phenotypic class of …
FBgn0259215	1	3	0	0	0	2	1.30632	0.532687			Ir93a	LINK	The gene Ionotropic receptor 93a is referred to in FlyBase by the symbol Dmel\Ir93a (CG42315, FBgn0259215). It is a protein_coding_gene from Dmel. It has one annotated transcript and one polypeptide. Gene sequence location is 3R:20851709..20859945. Its molecular function is described by: ionotropic glutamate receptor activity; signaling receptor activity; ligand-gated ion channel activity. It is …
FBgn0041183	3	0	0	0	1	1	1.30389	0.531624			Tep1	LINK	The gene Thioester-containing protein 1 is referred to in FlyBase by the symbol Dmel\Tep1 (CG18096, FBgn0041183). It is a protein_coding_gene from Dmel. It has one annotated transcript and one polypeptide. Gene sequence location is 2L:15888640..15893811. Its molecular function is described by: endopeptidase inhibitor activity. It is involved in the biological process described with: innate immune…
FBgn0037416	3	6	5	2	3	3	1.30066	0.185991	0.999974		Osi9	LINK	The gene Osiris 9 is referred to in FlyBase by the symbol Dmel\Osi9 (CG15592, FBgn0037416). It is a protein_coding_gene from Dmel. It has one annotated transcript and one polypeptide. Gene sequence location is 3R:6260211..6262105. Its molecular function is described by: . The biological processes in which it is involved are not known. 7 alleles are reported. No phenotypic data is available. The p…
FBgn0034318	97	209	101.699	71	56	101	1.29987	4.51124e-06	0.00352385	UP	CG14500	LINK	This gene is referred to in FlyBase by the symbol Dmel\CG14500 (FBgn0034318). It is a protein_coding_gene from Dmel. It has one annotated transcript and one polypeptide. Gene sequence location is 2R:18188978..18189654. Its molecular function is described by: carbohydrate binding. The biological processes in which it is involved are not known. 2 alleles are reported. No phenotypic data is availabl…
FBgn0029114	16	30	14	16	7	12	1.29701	0.0108164	0.942507		Tollo	LINK	The gene Tollo is referred to in FlyBase by the symbol Dmel\Tollo (CG6890, FBgn0029114). It is a protein_coding_gene from Dmel. It has one annotated transcript and one polypeptide. Gene sequence location is 3L:15235619..15242832. Its molecular function is unknown. It is involved in the biological process described with: peripheral nervous system neuron development; signal transduction; regulation…
FBgn0053639	11	58	10	3.051	20.001	15.025	1.28678	0.0422932	0.999974		CG33639	LINK	This gene is referred to in FlyBase by the symbol Dmel\CG33639 (FBgn0053639). It is a protein_coding_gene from Dmel. It has 4 annotated transcripts and 4 polypeptides (2 unique). Gene sequence location is X:18210812..18226076. Its molecular function is described by: neuropeptide receptor activity; G protein-coupled receptor activity. It is involved in the biological process described with: G prot…
FBgn0036128	2	2	1.008	1.001	1.006	1.989	1.28452	0.415466			Elo68beta	LINK	The gene Elongase 68beta is referred to in FlyBase by the symbol Dmel\Elo68beta (CG11801, FBgn0036128). It is a protein_coding_gene from Dmel. It has one annotated transcript and one polypeptide. Gene sequence location is 3L:11100675..11101698. Its molecular function is described by: fatty acid elongase activity. It is involved in the biological process described with 6 unique terms, many of whic…
FBgn0036128	2	2	1.008	1.001	1.006	1.989	1.28452	0.415466			Elo68beta	LINK	The gene Elongase 68beta is referred to in FlyBase by the symbol Dmel\Elo68beta (CG11801, FBgn0036128). It is a protein_coding_gene from Dmel. It has one annotated transcript and one polypeptide. Gene sequence location is 3L:11100675..11101698. Its molecular function is described by: fatty acid elongase activity. It is involved in the biological process described with 6 unique terms, many of whic…
FBgn0085319	2	2	6	1.002	5	0	1.2832	0.299695	0.999974		CG34290	LINK	This gene is referred to in FlyBase by the symbol Dmel\CG34290 (FBgn0085319). It is a protein_coding_gene from Dmel. It has one annotated transcript and one polypeptide. Gene sequence location is 3R:24288553..24289818. Its molecular function is described by: serine-type endopeptidase activity. It is involved in the biological process described with: proteolysis. One allele is reported. No phenoty…
FBgn0040262	4	9	3	3	4	2	1.27987	0.176288	0.999974		Ugt37C2	LINK	The gene UDP-glycosyltransferase family 37 member C2 is referred to in FlyBase by the symbol Dmel\Ugt37C2 (CG13270, FBgn0040262). It is a protein_coding_gene from Dmel. It has 2 annotated transcripts and 2 polypeptides (1 unique). Gene sequence location is 2L:16794211..16796009. Its molecular function is described by: transferase activity, transferring hexosyl groups. The biological processes in …
FBgn0040262	4	9	3	3	4	2	1.27987	0.176288	0.999974		Ugt37C2	LINK	The gene UDP-glycosyltransferase family 37 member C2 is referred to in FlyBase by the symbol Dmel\Ugt37C2 (CG13270, FBgn0040262). It is a protein_coding_gene from Dmel. It has 2 annotated transcripts and 2 polypeptides (1 unique). Gene sequence location is 2L:16794211..16796009. Its molecular function is described by: transferase activity, transferring hexosyl groups. The biological processes in …
FBgn0040262	4	9	3	3	4	2	1.27987	0.176288	0.999974		Ugt37C2	LINK	The gene UDP-glycosyltransferase family 37 member C2 is referred to in FlyBase by the symbol Dmel\Ugt37C2 (CG13270, FBgn0040262). It is a protein_coding_gene from Dmel. It has 2 annotated transcripts and 2 polypeptides (1 unique). Gene sequence location is 2L:16794211..16796009. Its molecular function is described by: transferase activity, transferring hexosyl groups. The biological processes in …
FBgn0040262	4	9	3	3	4	2	1.27987	0.176288	0.999974		Ugt37C2	LINK	The gene UDP-glycosyltransferase family 37 member C2 is referred to in FlyBase by the symbol Dmel\Ugt37C2 (CG13270, FBgn0040262). It is a protein_coding_gene from Dmel. It has 2 annotated transcripts and 2 polypeptides (1 unique). Gene sequence location is 2L:16794211..16796009. Its molecular function is described by: transferase activity, transferring hexosyl groups. The biological processes in …
FBgn0040262	4	9	3	3	4	2	1.27987	0.176288	0.999974		Ugt37C2	LINK	The gene UDP-glycosyltransferase family 37 member C2 is referred to in FlyBase by the symbol Dmel\Ugt37C2 (CG13270, FBgn0040262). It is a protein_coding_gene from Dmel. It has 2 annotated transcripts and 2 polypeptides (1 unique). Gene sequence location is 2L:16794211..16796009. Its molecular function is described by: transferase activity, transferring hexosyl groups. The biological processes in …
FBgn0040262	4	9	3	3	4	2	1.27987	0.176288	0.999974		Ugt37C2	LINK	The gene UDP-glycosyltransferase family 37 member C2 is referred to in FlyBase by the symbol Dmel\Ugt37C2 (CG13270, FBgn0040262). It is a protein_coding_gene from Dmel. It has 2 annotated transcripts and 2 polypeptides (1 unique). Gene sequence location is 2L:16794211..16796009. Its molecular function is described by: transferase activity, transferring hexosyl groups. The biological processes in …
FBgn0040262	4	9	3	3	4	2	1.27987	0.176288	0.999974		Ugt37C2	LINK	The gene UDP-glycosyltransferase family 37 member C2 is referred to in FlyBase by the symbol Dmel\Ugt37C2 (CG13270, FBgn0040262). It is a protein_coding_gene from Dmel. It has 2 annotated transcripts and 2 polypeptides (1 unique). Gene sequence location is 2L:16794211..16796009. Its molecular function is described by: transferase activity, transferring hexosyl groups. The biological processes in …
FBgn0031829	3	11	4	4	4	2	1.27801	0.160734	0.999974		IFT52	LINK	The gene Intraflagellar transport 52 is referred to in FlyBase by the symbol Dmel\IFT52 (CG9595, FBgn0031829). It is a protein_coding_gene from Dmel. It has one annotated transcript and one polypeptide. Gene sequence location is 2L:6555717..6557502. Its molecular function is described by: . It is involved in the biological process described with: intraciliary transport; cilium assembly. 5 alleles…
FBgn0035513	2	5.245	2	1	2	2	1.27538	0.303195	0.999974		Cpr64Ad	LINK	The gene Cuticular protein 64Ad is referred to in FlyBase by the symbol Dmel\Cpr64Ad (CG1259, FBgn0035513). It is a protein_coding_gene from Dmel. It has one annotated transcript and one polypeptide. Gene sequence location is 3L:4215379..4216414. Its molecular function is described by: structural constituent of chitin-based larval cuticle; structural constituent of cuticle. It is involved in the …
FBgn0035949	3.015	1.175	4	6.199	0	0	1.27392	0.359712	0.999974		CG13314	LINK	This gene is referred to in FlyBase by the symbol Dmel\CG13314 (FBgn0035949). It is a protein_coding_gene from Dmel. It has 2 annotated transcripts and 2 polypeptides (1 unique). Gene sequence location is 3L:8981795..8983212. Its molecular function is unknown. The biological processes in which it is involved are not known. 5 alleles are reported. No phenotypic data is available. The phenotypic cl…
FBgn0050101	4	4	3	4	1.012	2	1.26939	0.243455	0.999974		Vajk4	LINK	This gene is referred to in FlyBase by the symbol Dmel\Vajk4 (CG30101, FBgn0050101). It is a protein_coding_gene from Dmel. It has one annotated transcript and one polypeptide. Gene sequence location is 2R:17408258..17410204. Its molecular function is described by: chitin binding; structural constituent of chitin-based cuticle. It is involved in the biological process described with: chitin-based…
FBgn0041234	3	2.982	2	5.661	0	0	1.26831	0.383358	0.999974		Gr59f	LINK	The gene Gustatory receptor 59f is referred to in FlyBase by the symbol Dmel\Gr59f (CG33150, FBgn0041234). It is a protein_coding_gene from Dmel. It has one annotated transcript and one polypeptide. Gene sequence location is 2R:23542510..23543885. Its molecular function is described by: taste receptor activity. It is involved in the biological process described with: detection of chemical stimulu…
FBgn0036747	2	2.013	1	1	2	0	1.26751	0.434574			CG6052	LINK	This gene is referred to in FlyBase by the symbol Dmel\CG6052 (FBgn0036747). It is a protein_coding_gene from Dmel. It has one annotated transcript and one polypeptide. Gene sequence location is 3L:17723713..17729378. Its molecular function is described by: lipid transporter activity; ATPase-coupled transmembrane transporter activity; ATPase activity; ATP binding. It is involved in the biological…
FBgn0034866	2.049	3.104	0	2.412	1	0	1.26618	0.46615			Or59c	LINK	The gene Odorant receptor 59c is referred to in FlyBase by the symbol Dmel\Or59c (CG17226, FBgn0034866). It is a protein_coding_gene from Dmel. It has one annotated transcript and one polypeptide. Gene sequence location is 2R:23472300..23473753. Its molecular function is described by: olfactory receptor activity; odorant binding. It is involved in the biological process described with: detection …
FBgn0266489	59.97	44.736	31.387	42.552	26.849	19.879	1.26342	0.00196053	0.326702		CG45088	LINK	This gene is referred to in FlyBase by the symbol Dmel\CG45088 (FBgn0266489). It is a protein_coding_gene from Dmel. It has one annotated transcript and one polypeptide. Gene sequence location is 2R:13580586..13593339. Its molecular function is described by: . It is involved in the biological process described with: . 2 alleles are reported. No phenotypic data is available. No phenotypic class da…
FBgn0029879	6	3	6	5	2	3	1.26162	0.176225	0.999974		APC7	LINK	The gene Anaphase Promoting Complex subunit 7 is referred to in FlyBase by the symbol Dmel\APC7 (CG14444, FBgn0029879). It is a protein_coding_gene from Dmel. It has 2 annotated transcripts and 2 polypeptides (all unique). Gene sequence location is X:6597088..6599699. Its molecular function is unknown. It is involved in the biological process described with: cell division; positive regulation of …
FBgn0036416	1	2	2	1	1	1	1.25911	0.42679			CG7924	LINK	This gene is referred to in FlyBase by the symbol Dmel\CG7924 (FBgn0036416). It is a protein_coding_gene from Dmel. It has one annotated transcript and one polypeptide. Gene sequence location is 3L:14233469..14234609. Its molecular function is unknown. The biological processes in which it is involved are not known. 3 alleles are reported. No phenotypic data is available. The phenotypic class of a…
FBgn0053784	2	2	2	3	0	1	1.25866	0.395492	0.999974		CG33784	LINK	This gene is referred to in FlyBase by the symbol Dmel\CG33784 (FBgn0053784). It is a protein_coding_gene from Dmel. It has one annotated transcript and one polypeptide. Gene sequence location is 3R:10067905..10068572. Its molecular function is described by: . It is involved in the biological process described with: . 2 alleles are reported. No phenotypic data is available. No phenotypic class da…
FBgn0052088	2	4	1	1	1	2	1.25388	0.369198	0.999974		sunn	LINK	The gene sisters unbound is referred to in FlyBase by the symbol Dmel\sunn (CG32088, FBgn0052088). It is a protein_coding_gene from Dmel. It has one annotated transcript and one polypeptide. Gene sequence location is 3L:11728348..11732016. Its molecular function is unknown. It is involved in the biological process described with: meiotic sister chromatid cohesion, centromeric. 9 alleles are repor…
FBgn0264301	4.211	0	4.617	7.856	0	0	1.25356	0.642237	0.999974		CG43779	LINK	This gene is referred to in FlyBase by the symbol Dmel\CG43779 (FBgn0264301). It is a protein_coding_gene from Dmel. It has one annotated transcript and one polypeptide. Gene sequence location is 2L:13305920..13306755. Its molecular function is described by: . It is involved in the biological process described with: . 3 alleles are reported. No phenotypic data is available. The phenotypic class o…
FBgn0262846	1	4	3	4.112	1	0	1.25182	0.360066	0.999974		CG43210	LINK	This gene is referred to in FlyBase by the symbol Dmel\CG43210 (FBgn0262846). It is a protein_coding_gene from Dmel. It has 3 annotated transcripts and 3 polypeptides (1 unique). Gene sequence location is 3R:18564264..18565173. Its molecular function is described by: . It is involved in the biological process described with: . 4 alleles are reported. No phenotypic data is available. No phenotypic…
FBgn0039759	6	17	9	4	10	4	1.25061	0.0762716	0.999974		CG9733	LINK	This gene is referred to in FlyBase by the symbol Dmel\CG9733 (FBgn0039759). It is a protein_coding_gene from Dmel. It has 2 annotated transcripts and 2 polypeptides (all unique). Gene sequence location is 3R:30243978..30246703. Its molecular function is described by: serine-type endopeptidase activity. It is involved in the biological process described with: proteolysis. 8 alleles are reported. …
FBgn0086610	0	3	1	0	1	1	1.24832	0.534907			CG33342	LINK	The gene HDC15381 is referred to in FlyBase by the symbol Dmel\CG33342 (FBgn0086610). It is a protein_coding_gene from Dmel. It has one annotated transcript and one polypeptide. Gene sequence location is 3R:24376865..24377705. Its molecular function is described by: . It is involved in the biological process described with: . One allele is reported. No phenotypic data is available. No phenotypic …
FBgn0264830	6	7	2	2	1	6	1.24635	0.211273	0.999974		CG44038	LINK	This gene is referred to in FlyBase by the symbol Dmel\CG44038 (FBgn0264830). It is a protein_coding_gene from Dmel. It has one annotated transcript and one polypeptide. Gene sequence location is 3R:12260969..12261230. Its molecular function is described by: . It is involved in the biological process described with: . One allele is reported. No phenotypic data is available. No phenotypic class da…
FBgn0029795	7	12.738	2	9.011	2.111	2	1.24455	0.15825	0.999974		CG15773	LINK	This gene is referred to in FlyBase by the symbol Dmel\CG15773 (FBgn0029795). It is a protein_coding_gene from Dmel. It has 2 annotated transcripts and 2 polypeptides (all unique). Gene sequence location is X:5732740..5734614. Its molecular function is unknown. The biological processes in which it is involved are not known. 3 alleles are reported. No phenotypic data is available. No phenotypic cl…
FBgn0262980	5	25	26	12	15	6	1.2404	0.0359653	0.999974		CG43288	LINK	This gene is referred to in FlyBase by the symbol Dmel\CG43288 (FBgn0262980). It is a protein_coding_gene from Dmel. It has one annotated transcript and one polypeptide. Gene sequence location is X:4213025..4213421. Its molecular function is described by: . It is involved in the biological process described with: . No alleles are reported.
FBgn0035956	1	4	2	1	1	2	1.23419	0.378265	0.999974		Doc2	LINK	The gene Dorsocross2 is referred to in FlyBase by the symbol Dmel\Doc2 (CG5187, FBgn0035956). It is a protein_coding_gene from Dmel. It has one annotated transcript and one polypeptide. Gene sequence location is 3L:9012686..9019246. Its molecular function is described by: DNA-binding transcription factor activity, RNA polymerase II-specific; RNA polymerase II transcription regulatory region seque…
FBgn0003295	4	7	4	3	4	2	1.23261	0.192049	0.999974		ru	LINK	The gene roughoid is referred to in FlyBase by the symbol Dmel\ru (CG1214, FBgn0003295). It is a protein_coding_gene from Dmel. It has one annotated transcript and one polypeptide. Gene sequence location is 3L:1370628..1387437. Its molecular function is described by: serine-type endopeptidase activity. It is involved in the biological process described with 9 unique terms, many of which group und…
FBgn0030868	2	0	1	0	2	0	1.23062	0.552944			CG12986	LINK	This gene is referred to in FlyBase by the symbol Dmel\CG12986 (FBgn0030868). It is a protein_coding_gene from Dmel. It has one annotated transcript and one polypeptide. Gene sequence location is X:17819155..17819685. Its molecular function is unknown. The biological processes in which it is involved are not known. 2 alleles are reported. The phenotype of these alleles manifest in: trichogen cell…
FBgn0262541	4	3.181	7	2.126	3.371	4.058	1.22804	0.204962	0.999974		CG43095	LINK	This gene is referred to in FlyBase by the symbol Dmel\CG43095 (FBgn0262541). It is a protein_coding_gene from Dmel. It has one annotated transcript and one polypeptide. Gene sequence location is 3R:22771156..22771770. Its molecular function is described by: . It is involved in the biological process described with: . One allele is reported. No phenotypic data is available. No phenotypic class da…
FBgn0031324	2	6	0	0	4	0	1.2278	0.439809	0.999974		CG14342	LINK	This gene is referred to in FlyBase by the symbol Dmel\CG14342 (FBgn0031324). It is a protein_coding_gene from Dmel. It has one annotated transcript and one polypeptide. Gene sequence location is 2L:1204215..1205250. Its molecular function is unknown. The biological processes in which it is involved are not known. 2 alleles are reported. No phenotypic data is available. The phenotypic class of al…
FBgn0030027	5.048	10	6.098	12.053	0.999	2.013	1.22632	0.180469	0.999974		CG1632	LINK	This gene is referred to in FlyBase by the symbol Dmel\CG1632 (FBgn0030027). It is a protein_coding_gene from Dmel. It has 2 annotated transcripts and 2 polypeptides (1 unique). Gene sequence location is X:8252670..8272462. Its molecular function is unknown. It is involved in the biological process described with: proteolysis. 22 alleles are reported. No phenotypic data is available. The phenotyp…
FBgn0036597	12.015	19	28	17	10	11	1.22356	0.0186436	0.999974		CG4962	LINK	This gene is referred to in FlyBase by the symbol Dmel\CG4962 (FBgn0036597). It is a protein_coding_gene from Dmel. It has one annotated transcript and one polypeptide. Gene sequence location is 3L:16294711..16295547. Its molecular function is unknown. The biological processes in which it is involved are not known. 3 alleles are reported. No phenotypic data is available. The phenotypic class of a…
FBgn0034942	0	7.99	1	1	2.35	1	1.2224	0.415562	0.999974		CG13566	LINK	This gene is referred to in FlyBase by the symbol Dmel\CG13566 (FBgn0034942). It is a protein_coding_gene from Dmel. It has one annotated transcript and one polypeptide. Gene sequence location is 2R:23961477..23962577. Its molecular function is described by: . It is involved in the biological process described with: . 3 alleles are reported. No phenotypic data is available. The phenotypic class o…
FBgn0028938	2	7.122	0	2	0	3.265	1.21953	0.389566	0.999974		Vajk1	LINK	This gene is referred to in FlyBase by the symbol Dmel\Vajk1 (CG16886, FBgn0028938). It is a protein_coding_gene from Dmel. It has 2 annotated transcripts and 2 polypeptides (all unique). Gene sequence location is 2L:13920707..13923553. Its molecular function is described by: chitin binding; structural constituent of chitin-based cuticle. It is involved in the biological process described with: c…
FBgn0034618	255.358	323.165	131.998	282.932	48.657	144.909	1.21879	0.0561998	0.999974		CG9485	LINK	This gene is referred to in FlyBase by the symbol Dmel\CG9485 (FBgn0034618). It is a protein_coding_gene from Dmel. It has 6 annotated transcripts and 6 polypeptides (4 unique). Gene sequence location is 2R:21312399..21319569. Its molecular function is described by: 4-alpha-glucanotransferase activity; amylo-alpha-1,6-glucosidase activity. It is involved in the biological process described with: …
FBgn0029928	2	4.035	2.026	3	2	0	1.21334	0.357877	0.999974		CG3032	LINK	This gene is referred to in FlyBase by the symbol Dmel\CG3032 (FBgn0029928). It is a protein_coding_gene from Dmel. It has 2 annotated transcripts and 2 polypeptides (1 unique). Gene sequence location is X:7012239..7013881. Its molecular function is described by 6 unique terms, many of which group under: binding; molecular function regulator; transcription regulator activity; organic cyclic compo…
FBgn0023180	8	7.494	2	5.084	3.316	3	1.2107	0.178304	0.999974		Orc6	LINK	The gene Origin recognition complex subunit 6 is referred to in FlyBase by the symbol Dmel\Orc6 (CG1584, FBgn0023180). It is a protein_coding_gene from Dmel. It has one annotated transcript and one polypeptide. Gene sequence location is 2R:9845458..9846485. Its molecular function is described by: protein homodimerization activity; DNA binding; GTPase activator activity. It is involved in the biol…
FBgn0038073	11	6	8.642	8	7	2	1.20927	0.110535	0.999974		CG14395	LINK	This gene is referred to in FlyBase by the symbol Dmel\CG14395 (FBgn0038073). It is a protein_coding_gene from Dmel. It has 8 annotated transcripts and 8 polypeptides (4 unique). Gene sequence location is 3R:12662831..12673959. Its molecular function is described by: . It is involved in the biological process described with: . 2 alleles are reported. No phenotypic data is available. The phenotypi…
FBgn0036951	7	1	3	4	3	1	1.20823	0.271215	0.999974		CG7017	LINK	This gene is referred to in FlyBase by the symbol Dmel\CG7017 (FBgn0036951). It is a protein_coding_gene from Dmel. It has 2 annotated transcripts and 2 polypeptides (1 unique). Gene sequence location is 3L:20210292..20212122. Its molecular function is described by: chitin binding. It is involved in the biological process described with: chitin metabolic process. 5 alleles are reported. No phenot…
FBgn0038510	1	5	2	4	0	1	1.20604	0.386412	0.999974		CG14331	LINK	This gene is referred to in FlyBase by the symbol Dmel\CG14331 (FBgn0038510). It is a protein_coding_gene from Dmel. It has one annotated transcript and one polypeptide. Gene sequence location is 3R:17438968..17440728. Its molecular function is unknown. The biological processes in which it is involved are not known. 3 alleles are reported. No phenotypic data is available. The phenotypic class of …
FBgn0051439	1	6.504	2.327	1	2	2.233	1.20491	0.34501	0.999974		Muc96D	LINK	The gene Mucin 96D is referred to in FlyBase by the symbol Dmel\Muc96D (CG31439, FBgn0051439). It is a protein_coding_gene from Dmel. It has one annotated transcript and one polypeptide. Gene sequence location is 3R:25397788..25400645. Its molecular function is described by: extracellular matrix structural constituent; chitin binding. It is involved in the biological process described with: chiti…
FBgn0000166	5	12.491	1	1	5	4.022	1.1884	0.223916	0.999974		bcd	LINK	The gene bicoid is referred to in FlyBase by the symbol Dmel\bcd (CG1034, FBgn0000166). It is a protein_coding_gene from Dmel. It has 5 annotated transcripts and 5 polypeptides (all unique). Gene sequence location is 3R:6755842..6759466. Its molecular function is described by 6 unique terms, many of which group under: molecular function regulator; DNA-binding transcription factor activity; nuclei…
FBgn0039663	6.323	7.657	3.397	2.195	2.098	6.884	1.18701	0.203296	0.999974		CG2321	LINK	This gene is referred to in FlyBase by the symbol Dmel\CG2321 (FBgn0039663). It is a protein_coding_gene from Dmel. It has 2 annotated transcripts and 2 polypeptides (1 unique). Gene sequence location is 3R:29484783..29489265. Its molecular function is unknown. The biological processes in which it is involved are not known. 5 alleles are reported. The phenotype of these alleles manifest in: trich…
FBgn0267431	4	13.17	7	2.006	5	7	1.18615	0.136954	0.999974		Myo81F	LINK	The gene Myosin 81F is referred to in FlyBase by the symbol Dmel\Myo81F (CG45784, FBgn0267431). It is a protein_coding_gene from Dmel. It has one annotated transcript and one polypeptide. Gene sequence location is 3R:567076..2532932. Its molecular function is described by: actin filament binding; microfilament motor activity; ATP binding; actin-dependent ATPase activity. It is involved in the bio…
FBgn0034769	2	9	1	4	2.052	1	1.18081	0.307153	0.999974		Obp58c	LINK	The gene Odorant-binding protein 58c is referred to in FlyBase by the symbol Dmel\Obp58c (CG13524, FBgn0034769). It is a protein_coding_gene from Dmel. It has one annotated transcript and one polypeptide. Gene sequence location is 2R:22705872..22706678. Its molecular function is described by: odorant binding. It is involved in the biological process described with: sensory perception of chemical …
FBgn0029813	4	6	4	4	3	2	1.18018	0.217777	0.999974		AgmNAT	LINK	The gene Agmatine N-acetyltransferase is referred to in FlyBase by the symbol Dmel\AgmNAT (CG15766, FBgn0029813). It is a protein_coding_gene from Dmel. It has one annotated transcript and one polypeptide. Gene sequence location is X:5814864..5815820. Its molecular function is described by: N-acetyltransferase activity. The biological processes in which it is involved are not known. 4 alleles are…
FBgn0031470	0	0	3	0	1	1	1.17228	0.583109			CG18557	LINK	This gene is referred to in FlyBase by the symbol Dmel\CG18557 (FBgn0031470). It is a protein_coding_gene from Dmel. It has one annotated transcript and one polypeptide. Gene sequence location is 2L:2844601..2845734. Its molecular function is described by: serine-type endopeptidase activity. It is involved in the biological process described with: proteolysis. 5 alleles are reported. No phenotypi…
FBgn0039022	17	36.069	20	10	24	10.097	1.1699	0.0200675	0.999974		Nepl13	LINK	The gene Neprilysin-like 13 is referred to in FlyBase by the symbol Dmel\Nepl13 (CG4725, FBgn0039022). It is a protein_coding_gene from Dmel. It has one annotated transcript and one polypeptide. Gene sequence location is 3R:22758810..22761076. Its molecular function is described by: metalloendopeptidase activity. It is involved in the biological process described with: proteolysis. 3 alleles are …
FBgn0004854	3	20.005	12	7	2	12	1.16893	0.10735	0.999974		B-H2	LINK	The gene BarH2 is referred to in FlyBase by the symbol Dmel\B-H2 (CG5488, FBgn0004854). It is a protein_coding_gene from Dmel. It has 2 annotated transcripts and 2 polypeptides (all unique). Gene sequence location is X:17314581..17324175. Its molecular function is described by: DNA-binding transcription factor activity, RNA polymerase II-specific; DNA-binding transcription activator activity, RNA…
FBgn0051053	3	1.006	0	2	0	1.012	1.1687	0.515505			nenya	LINK	The gene nenya is referred to in FlyBase by the symbol Dmel\nenya (CG31053, FBgn0051053). It is a protein_coding_gene from Dmel. It has one annotated transcript and one polypeptide. Gene sequence location is 3R:27927357..27928174. Its molecular function is described by: zinc ion binding; SUMO transferase activity. It is involved in the biological process described with: positive regulation of mei…
FBgn0004240	62	95.169	209.736	114.994	123.57	13.592	1.16766	0.233868	0.999974		DptA	LINK	The gene Diptericin A is referred to in FlyBase by the symbol Dmel\DptA (CG12763, FBgn0004240). It is a protein_coding_gene from Dmel. It has one annotated transcript and one polypeptide. Gene sequence location is 2R:18865765..18866260. Its molecular function is unknown. It is involved in the biological process described with 6 unique terms, many of which group under: response to external stimulu…
FBgn0040104	43	75.355	45	34	37	32	1.16073	0.000436979	0.113778		lectin-24A	LINK	The gene lectin-24A is referred to in FlyBase by the symbol Dmel\lectin-24A (CG3410, FBgn0040104). It is a protein_coding_gene from Dmel. It has one annotated transcript and one polypeptide. Gene sequence location is 2L:3716800..3717773. Its molecular function is described by: galactose binding; carbohydrate binding. The biological processes in which it is involved are not known. 2 alleles are re…
FBgn0267049	54.639	74.552	52.145	41.312	36.836	40.142	1.15832	0.000247407	0.0702749		CG45493	LINK	This gene is referred to in FlyBase by the symbol Dmel\CG45493 (FBgn0267049). It is a protein_coding_gene from Dmel. It has one annotated transcript and one polypeptide. Gene sequence location is X:19948079..19948873. Its molecular function is described by: . It is involved in the biological process described with: . No alleles are reported.
FBgn0030105	4	8.075	6.082	7	1	4.215	1.15798	0.187458	0.999974		CG15369	LINK	This gene is referred to in FlyBase by the symbol Dmel\CG15369 (FBgn0030105). It is a protein_coding_gene from Dmel. It has 2 annotated transcripts and 2 polypeptides (1 unique). Gene sequence location is X:9216872..9217466. Its molecular function is described by: cysteine-type endopeptidase inhibitor activity. The biological processes in which it is involved are not known. 4 alleles are reported…
FBgn0039728	1	5	1	1	2	1	1.15139	0.423143	0.999974		CG7896	LINK	This gene is referred to in FlyBase by the symbol Dmel\CG7896 (FBgn0039728). It is a protein_coding_gene from Dmel. It has one annotated transcript and one polypeptide. Gene sequence location is 3R:29983426..29990785. Its molecular function is unknown. The biological processes in which it is involved are not known. 10 alleles are reported. The phenotype of these alleles manifest in: mesothoracic …
FBgn0028504	23.47	23.685	36.712	25.003	13.486	19.62	1.14774	0.0114411	0.964819		CG12182	LINK	This gene is referred to in FlyBase by the symbol Dmel\CG12182 (FBgn0028504). It is a protein_coding_gene from Dmel. It has 3 annotated transcripts and 3 polypeptides (2 unique). Gene sequence location is 3L:2595842..2599579. Its molecular function is described by: . It is involved in the biological process described with: . 6 alleles are reported. The phenotypes of these alleles manifest in: win…
FBgn0038047	3	1	0	2	1.006	0	1.14774	0.522024			CG5245	LINK	This gene is referred to in FlyBase by the symbol Dmel\CG5245 (FBgn0038047). It is a protein_coding_gene from Dmel. It has one annotated transcript and one polypeptide. Gene sequence location is 3R:12429560..12431235. Its molecular function is described by: zinc ion binding; DNA-binding transcription factor activity, RNA polymerase II-specific; RNA polymerase II cis-regulatory region sequence-spe…
FBgn0027364	3	5	5	6	1	2	1.14702	0.257436	0.999974		Six4	LINK	The gene Six4 is referred to in FlyBase by the symbol Dmel\Six4 (CG3871, FBgn0027364). It is a protein_coding_gene from Dmel. It has 2 annotated transcripts and 2 polypeptides (1 unique). Gene sequence location is 3L:20788886..20792777. Its molecular function is described by: transcription regulatory region sequence-specific DNA binding; DNA-binding transcription factor activity, RNA polymerase I…
FBgn0053105	12.995	71.153	21.338	24.747	11.595	26.505	1.14663	0.0176784	0.999974		p24-2	LINK	The gene p24-related-2 is referred to in FlyBase by the symbol Dmel\p24-2 (CG33105, FBgn0053105). It is a protein_coding_gene from Dmel. It has 2 annotated transcripts and 2 polypeptides (1 unique). Gene sequence location is 3R:9687402..9692794. Its molecular function is described by: cargo receptor activity. It is involved in the biological process described with: Golgi organization; Golgi vesic…
FBgn0040255	3	6.019	2	3	2	2.007	1.14164	0.296357	0.999974		Ugt35E2	LINK	The gene UDP-glycosyltransferase family 35 member E2 is referred to in FlyBase by the symbol Dmel\Ugt35E2 (CG6653, FBgn0040255). It is a protein_coding_gene from Dmel. It has one annotated transcript and one polypeptide. Gene sequence location is 3R:11166177..11167981. Its molecular function is described by: transferase activity, transferring hexosyl groups. The biological processes in which it i…
FBgn0040255	3	6.019	2	3	2	2.007	1.14164	0.296357	0.999974		Ugt35E2	LINK	The gene UDP-glycosyltransferase family 35 member E2 is referred to in FlyBase by the symbol Dmel\Ugt35E2 (CG6653, FBgn0040255). It is a protein_coding_gene from Dmel. It has one annotated transcript and one polypeptide. Gene sequence location is 3R:11166177..11167981. Its molecular function is described by: transferase activity, transferring hexosyl groups. The biological processes in which it i…
FBgn0040255	3	6.019	2	3	2	2.007	1.14164	0.296357	0.999974		Ugt35E2	LINK	The gene UDP-glycosyltransferase family 35 member E2 is referred to in FlyBase by the symbol Dmel\Ugt35E2 (CG6653, FBgn0040255). It is a protein_coding_gene from Dmel. It has one annotated transcript and one polypeptide. Gene sequence location is 3R:11166177..11167981. Its molecular function is described by: transferase activity, transferring hexosyl groups. The biological processes in which it i…
FBgn0040255	3	6.019	2	3	2	2.007	1.14164	0.296357	0.999974		Ugt35E2	LINK	The gene UDP-glycosyltransferase family 35 member E2 is referred to in FlyBase by the symbol Dmel\Ugt35E2 (CG6653, FBgn0040255). It is a protein_coding_gene from Dmel. It has one annotated transcript and one polypeptide. Gene sequence location is 3R:11166177..11167981. Its molecular function is described by: transferase activity, transferring hexosyl groups. The biological processes in which it i…
FBgn0040255	3	6.019	2	3	2	2.007	1.14164	0.296357	0.999974		Ugt35E2	LINK	The gene UDP-glycosyltransferase family 35 member E2 is referred to in FlyBase by the symbol Dmel\Ugt35E2 (CG6653, FBgn0040255). It is a protein_coding_gene from Dmel. It has one annotated transcript and one polypeptide. Gene sequence location is 3R:11166177..11167981. Its molecular function is described by: transferase activity, transferring hexosyl groups. The biological processes in which it i…
FBgn0040255	3	6.019	2	3	2	2.007	1.14164	0.296357	0.999974		Ugt35E2	LINK	The gene UDP-glycosyltransferase family 35 member E2 is referred to in FlyBase by the symbol Dmel\Ugt35E2 (CG6653, FBgn0040255). It is a protein_coding_gene from Dmel. It has one annotated transcript and one polypeptide. Gene sequence location is 3R:11166177..11167981. Its molecular function is described by: transferase activity, transferring hexosyl groups. The biological processes in which it i…
FBgn0040255	3	6.019	2	3	2	2.007	1.14164	0.296357	0.999974		Ugt35E2	LINK	The gene UDP-glycosyltransferase family 35 member E2 is referred to in FlyBase by the symbol Dmel\Ugt35E2 (CG6653, FBgn0040255). It is a protein_coding_gene from Dmel. It has one annotated transcript and one polypeptide. Gene sequence location is 3R:11166177..11167981. Its molecular function is described by: transferase activity, transferring hexosyl groups. The biological processes in which it i…
FBgn0037685	0	2	0	0	1	0	1.13977	0.702202			Or85f	LINK	The gene Odorant receptor 85f is referred to in FlyBase by the symbol Dmel\Or85f (CG16755, FBgn0037685). It is a protein_coding_gene from Dmel. It has one annotated transcript and one polypeptide. Gene sequence location is 3R:9398190..9399551. Its molecular function is described by: odorant binding; olfactory receptor activity. It is involved in the biological process described with: detection of…
FBgn0038028	0	2	0	0	1	0	1.13977	0.702202			CG10035	LINK	This gene is referred to in FlyBase by the symbol Dmel\CG10035 (FBgn0038028). It is a protein_coding_gene from Dmel. It has 2 annotated transcripts and 2 polypeptides (1 unique). Gene sequence location is 3R:12380869..12382691. Its molecular function is described by: . It is involved in the biological process described with: . One allele is reported. The phenotype of this allele manifest in: chae…
FBgn0040950	0	2	0	0	1	0	1.13977	0.702202			Muc26B	LINK	The gene Mucin 26B is referred to in FlyBase by the symbol Dmel\Muc26B (CG13990, FBgn0040950). It is a protein_coding_gene from Dmel. It has one annotated transcript and one polypeptide. Gene sequence location is 2L:6151969..6153701. Its molecular function is described by: chitin binding; extracellular matrix structural constituent. It is involved in the biological process described with: chitin …
FBgn0013277	0	2.136	0	0	1.952	0	1.13977	0.702202			Hsp70Ba	LINK	The gene Heat-shock-protein-70Ba is referred to in FlyBase by the symbol Dmel\Hsp70Ba (CG31449, FBgn0013277). It is a protein_coding_gene from Dmel. It has one annotated transcript and one polypeptide. Gene sequence location is 3R:12465453..12467776. Its molecular function is described by 6 unique terms, many of which group under: binding; protein binding; protein folding chaperone; purine nucleo…
FBgn0013277	0	2.136	0	0	1.952	0	1.13977	0.702202			Hsp70Ba	LINK	The gene Heat-shock-protein-70Ba is referred to in FlyBase by the symbol Dmel\Hsp70Ba (CG31449, FBgn0013277). It is a protein_coding_gene from Dmel. It has one annotated transcript and one polypeptide. Gene sequence location is 3R:12465453..12467776. Its molecular function is described by 6 unique terms, many of which group under: binding; protein binding; protein folding chaperone; purine nucleo…
FBgn0013277	0	2.136	0	0	1.952	0	1.13977	0.702202			Hsp70Ba	LINK	The gene Heat-shock-protein-70Ba is referred to in FlyBase by the symbol Dmel\Hsp70Ba (CG31449, FBgn0013277). It is a protein_coding_gene from Dmel. It has one annotated transcript and one polypeptide. Gene sequence location is 3R:12465453..12467776. Its molecular function is described by 6 unique terms, many of which group under: binding; protein binding; protein folding chaperone; purine nucleo…
FBgn0013277	0	2.136	0	0	1.952	0	1.13977	0.702202			Hsp70Ba	LINK	The gene Heat-shock-protein-70Ba is referred to in FlyBase by the symbol Dmel\Hsp70Ba (CG31449, FBgn0013277). It is a protein_coding_gene from Dmel. It has one annotated transcript and one polypeptide. Gene sequence location is 3R:12465453..12467776. Its molecular function is described by 6 unique terms, many of which group under: binding; protein binding; protein folding chaperone; purine nucleo…
FBgn0264298	55.891	0	0	0	28.659	14.633	1.13938	0.760328	0.999974		CG43776	LINK	This gene is referred to in FlyBase by the symbol Dmel\CG43776 (FBgn0264298). It is a protein_coding_gene from Dmel. It has 2 annotated transcripts and 2 polypeptides (1 unique). Gene sequence location is 2R:24123167..24126630. Its molecular function is described by: . It is involved in the biological process described with: . 3 alleles are reported. No phenotypic data is available. The phenotypi…
FBgn0261356	0	2.017	0	0	0	1	1.13866	0.704823			CG42633	LINK	This gene is referred to in FlyBase by the symbol Dmel\CG42633 (FBgn0261356). It is a protein_coding_gene from Dmel. It has one annotated transcript and one polypeptide. Gene sequence location is 3R:10780965..10782267. Its molecular function is described by: . It is involved in the biological process described with: . One allele is reported. No phenotypic data is available. No phenotypic class da…
FBgn0053640	0	2.574	0	0	0	1	1.13866	0.704823			CG33640	LINK	This gene is referred to in FlyBase by the symbol Dmel\CG33640 (FBgn0053640). It is a protein_coding_gene from Dmel. It has one annotated transcript and one polypeptide. Gene sequence location is 2L:13527841..13528537. Its molecular function is described by: . It is involved in the biological process described with: . 2 alleles are reported. No phenotypic data is available. No phenotypic class da…
FBgn0041625	0	2	0	0	0	1	1.13866	0.704823			Or65a	LINK	The gene Odorant receptor 65a is referred to in FlyBase by the symbol Dmel\Or65a (CG32401, FBgn0041625). It is a protein_coding_gene from Dmel. It has one annotated transcript and one polypeptide. Gene sequence location is 3L:6320611..6322098. Its molecular function is described by: olfactory receptor activity; odorant binding. It is involved in the biological process described with: detection of…
FBgn0052241	0	2	0	0	0	1	1.13866	0.704823			CG32241	LINK	This gene is referred to in FlyBase by the symbol Dmel\CG32241 (FBgn0052241). It is a protein_coding_gene from Dmel. It has one annotated transcript and one polypeptide. Gene sequence location is 3L:4465105..4466630. Its molecular function is described by: . It is involved in the biological process described with: . 2 alleles are reported. No phenotypic data is available. The phenotypic class of …
FBgn0033275	0	2	0	0	0	1	1.13866	0.704823			CG14756	LINK	This gene is referred to in FlyBase by the symbol Dmel\CG14756 (FBgn0033275). It is a protein_coding_gene from Dmel. It has one annotated transcript and one polypeptide. Gene sequence location is 2R:8204888..8205706. Its molecular function is unknown. The biological processes in which it is involved are not known. 3 alleles are reported. No phenotypic data is available. The phenotypic classes of …
FBgn0041579	64	316.773	208.976	92	208	42	1.1361	0.159301	0.999974		AttC	LINK	The gene Attacin-C is referred to in FlyBase by the symbol Dmel\AttC (CG4740, FBgn0041579). It is a protein_coding_gene from Dmel. It has one annotated transcript and one polypeptide. Gene sequence location is 2R:13393705..13394667. Its molecular function is unknown. It is involved in the biological process described with: antibacterial humoral response; response to bacterium; humoral immune resp…
FBgn0053270	0	2.106	0	1	0	0	1.13515	0.713327			CG33270	LINK	This gene is referred to in FlyBase by the symbol Dmel\CG33270 (FBgn0053270). It is a protein_coding_gene from Dmel. It has one annotated transcript and one polypeptide. Gene sequence location is 3L:11578236..11578623. Its molecular function is described by: . The biological processes in which it is involved are not known. 2 alleles are reported. The phenotypes of these alleles manifest in: mesot…
FBgn0035511	0	2.188	0	1	0	0	1.13515	0.713327			Cpr64Ab	LINK	The gene Cuticular protein 64Ab is referred to in FlyBase by the symbol Dmel\Cpr64Ab (CG15007, FBgn0035511). It is a protein_coding_gene from Dmel. It has one annotated transcript and one polypeptide. Gene sequence location is 3L:4210880..4211540. Its molecular function is described by: structural constituent of chitin-based larval cuticle; structural constituent of cuticle. It is involved in the…
FBgn0261633	0	2	0	1	0	0	1.13515	0.713327			CG42716	LINK	This gene is referred to in FlyBase by the symbol Dmel\CG42716 (FBgn0261633). It is a protein_coding_gene from Dmel. It has one annotated transcript and one polypeptide. Gene sequence location is 3L:16033778..16034170. Its molecular function is described by: serine-type endopeptidase inhibitor activity. The biological processes in which it is involved are not known. One allele is reported. No phe…
FBgn0033578	1	10.036	3	2	4	2	1.13134	0.287804	0.999974		BBS4	LINK	The gene Bardet-Biedl syndrome 4 is referred to in FlyBase by the symbol Dmel\BBS4 (CG13232, FBgn0033578). It is a protein_coding_gene from Dmel. It has 2 annotated transcripts and 2 polypeptides (all unique). Gene sequence location is 2R:11135923..11139315. Its molecular function is described by: dynactin binding; protein-macromolecule adaptor activity. It is involved in the biological process d…
FBgn0015770	77.157	13.375	71.064	111.854	16.594	15.275	1.12452	0.322342	0.999974		MstProx	LINK	The gene MstProx is referred to in FlyBase by the symbol Dmel\MstProx (CG1149, FBgn0015770). It is a protein_coding_gene from Dmel. It has one annotated transcript and one polypeptide. Gene sequence location is 3R:7365939..7369305. Its molecular function is described by: signaling receptor activity. It is involved in the biological process described with: toll-like receptor signaling pathway; sig…
FBgn0033579	6	20.124	11	6	6	11.001	1.12428	0.0791059	0.999974		CG13229	LINK	This gene is referred to in FlyBase by the symbol Dmel\CG13229 (FBgn0033579). It is a protein_coding_gene from Dmel. It has 3 annotated transcripts and 3 polypeptides (1 unique). Gene sequence location is 2R:11139304..11172206. Its molecular function is described by: neuropeptide receptor activity; G protein-coupled receptor activity; G protein-coupled peptide receptor activity. It is involved in…
FBgn0284223	0	5.028	2.614	1.633	2.402	1.965	1.1232	0.450121	0.999974		CG46307	LINK	This gene is referred to in FlyBase by the symbol Dmel\CG46307 (FBgn0284223). It is a protein_coding_gene from Dmel. It has one annotated transcript and one polypeptide. Gene sequence location is 2L:21104568..21132909. Its molecular function is unknown. The biological processes in which it is involved are not known. 7 alleles are reported. No phenotypic data is available. No phenotypic class data…
FBgn0265487	643.787	1476.06	731.354	499.149	628.972	636.298	1.12229	1.00728e-06	0.00114446	UP	mbl	LINK	The gene muscleblind is referred to in FlyBase by the symbol Dmel\mbl (CG33197, FBgn0265487). It is a protein_coding_gene from Dmel. It has 18 annotated transcripts and 18 polypeptides (all unique). Gene sequence location is 2R:17216549..17379376. Its molecular function is described by: nucleic acid binding; metal ion binding; RNA binding. It is involved in the biological process described with 9…
FBgn0030841	3	6	2	2	1	4	1.11981	0.313508	0.999974		CG8568	LINK	This gene is referred to in FlyBase by the symbol Dmel\CG8568 (FBgn0030841). It is a protein_coding_gene from Dmel. It has one annotated transcript and one polypeptide. Gene sequence location is X:17448990..17452543. Its molecular function is described by: . It is involved in the biological process described with: . 5 alleles are reported. No phenotypic data is available. The phenotypic classes o…
FBgn0038240	2	1	0	0	1	1	1.1189	0.582669			CG14851	LINK	This gene is referred to in FlyBase by the symbol Dmel\CG14851 (FBgn0038240). It is a protein_coding_gene from Dmel. It has one annotated transcript and one polypeptide. Gene sequence location is 3R:14562340..14562845. Its molecular function is unknown. The biological processes in which it is involved are not known. 3 alleles are reported. No phenotypic data is available. The phenotypic class of …
FBgn0035666	123	177.384	91.049	83	57	118	1.11755	0.000177016	0.0579102		Jon65Aii	LINK	The gene Jonah 65Aii is referred to in FlyBase by the symbol Dmel\Jon65Aii (CG6580, FBgn0035666). It is a protein_coding_gene from Dmel. It has one annotated transcript and one polypeptide. Gene sequence location is 3L:6052321..6053215. Its molecular function is described by: serine-type endopeptidase activity. It is involved in the biological process described with: proteolysis. 4 alleles are re…
FBgn0031718	2	2	0	3	0	0	1.11531	0.565402			CG14014	LINK	This gene is referred to in FlyBase by the symbol Dmel\CG14014 (FBgn0031718). It is a protein_coding_gene from Dmel. It has one annotated transcript and one polypeptide. Gene sequence location is 2L:5549709..5550835. Its molecular function is unknown. The biological processes in which it is involved are not known. 4 alleles are reported. No phenotypic data is available. The phenotypic class of al…
FBgn0029827	33	47.008	55.037	20.43	43.658	26.999	1.11434	0.00708069	0.756363		CG6048	LINK	This gene is referred to in FlyBase by the symbol Dmel\CG6048 (FBgn0029827). It is a protein_coding_gene from Dmel. It has one annotated transcript and one polypeptide. Gene sequence location is X:5952565..5954046. Its molecular function is described by: serine-type endopeptidase activity. It is involved in the biological process described with: proteolysis; regulation of terminal button organiza…
FBgn0029858	34.653	15.586	52.498	33.344	22.073	21.249	1.11355	0.0223979	0.999974		mldr	LINK	The gene mulder is referred to in FlyBase by the symbol Dmel\mldr (CG15896, FBgn0029858). It is a protein_coding_gene from Dmel. It has 2 annotated transcripts and 2 polypeptides (1 unique). Gene sequence location is X:6291303..6294177. Its molecular function is described by: ribonuclease P activity. It is involved in the biological process described with: tRNA 5'-leader removal; mitochondrial tR…
FBgn0046323	13	8	10	7	5	10	1.11296	0.0959464	0.999974		ORY	LINK	The gene Occludin-Related Y is referred to in FlyBase by the symbol Dmel\ORY (CG40446, FBgn0046323). It is a protein_coding_gene from Dmel. It has one annotated transcript and one polypeptide. Gene sequence location is Y:3561745..3618339. Its molecular function is described by: . It is involved in the biological process described with: . One allele is reported. No phenotypic data is available. No…
FBgn0035851	16.299	30.788	18.452	27.379	13.724	4.462	1.10751	0.0369614	0.999974		MED24	LINK	The gene Mediator complex subunit 24 is referred to in FlyBase by the symbol Dmel\MED24 (CG7999, FBgn0035851). It is a protein_coding_gene from Dmel. It has one annotated transcript and one polypeptide. Gene sequence location is 3L:8191270..8196573. Its molecular function is described by: transcription coregulator activity; protein binding. It is involved in the biological process described with …
FBgn0037782	165	351	86	93.011	105	171.058	1.10681	0.00115425	0.225403		Npc2d	LINK	The gene Niemann-Pick type C-2d is referred to in FlyBase by the symbol Dmel\Npc2d (CG12813, FBgn0037782). It is a protein_coding_gene from Dmel. It has one annotated transcript and one polypeptide. Gene sequence location is 3R:10055356..10056083. Its molecular function is described by: sterol binding. It is involved in the biological process described with: sterol transport; intracellular choles…
FBgn0041105	1	2	3	1	2	1	1.1045	0.438765	0.999974		nerfin-2	LINK	The gene nervous fingers 2 is referred to in FlyBase by the symbol Dmel\nerfin-2 (CG12809, FBgn0041105). It is a protein_coding_gene from Dmel. It has 2 annotated transcripts and 2 polypeptides (all unique). Gene sequence location is 3R:10071117..10073761. Its molecular function is described by: nucleic acid binding; DNA-binding transcription repressor activity, RNA polymerase II-specific. It is …
FBgn0038067	128	145.543	94.061	122	58.398	79.117	1.10146	8.4227e-05	0.0357701	UP	CG11598	LINK	This gene is referred to in FlyBase by the symbol Dmel\CG11598 (FBgn0038067). It is a protein_coding_gene from Dmel. It has one annotated transcript and one polypeptide. Gene sequence location is 3R:12634917..12636283. Its molecular function is described by: sterol esterase activity; triglyceride lipase activity; lipase activity. It is involved in the biological process described with: lipid meta…
FBgn0286941	64.717	39.487	37.872	29.22	55.437	15.115	1.10002	0.0200178	0.999974		CG46435	LINK	This gene is referred to in FlyBase by the symbol Dmel\CG46435 (FBgn0286941). It is a protein_coding_gene from Dmel. It has one annotated transcript and one polypeptide. Gene sequence location is 3L:19545110..19547293. Its molecular function is unknown. The biological processes in which it is involved are not known. No alleles are reported.
FBgn0264395	6	11	8	7	1	9	1.09951	0.151348	0.999974		CG43843	LINK	This gene is referred to in FlyBase by the symbol Dmel\CG43843 (FBgn0264395). It is a protein_coding_gene from Dmel. It has one annotated transcript and one polypeptide. Gene sequence location is X:18459138..18460418. Its molecular function is described by: . It is involved in the biological process described with: . One allele is reported. No phenotypic data is available. No phenotypic class dat…
FBgn0261679	6.082	7.475	5	0	11	0	1.09726	0.571934	0.999974		CG42726	LINK	This gene is referred to in FlyBase by the symbol Dmel\CG42726 (FBgn0261679). It is a protein_coding_gene from Dmel. It has one annotated transcript and one polypeptide. Gene sequence location is 3R:15348048..15350391. Its molecular function is described by: DNA-binding transcription factor activity, RNA polymerase II-specific; RNA polymerase II cis-regulatory region sequence-specific DNA binding…
FBgn0053816	4.746	7.997	2.221	0	3.754	5.549	1.09695	0.311809	0.999974		His1:CG33816	LINK	The gene His1:CG33816 is referred to in FlyBase by the symbol Dmel\His1:CG33816 (CG33816, FBgn0053816). It is a protein_coding_gene from Dmel. It has one annotated transcript and one polypeptide. Gene sequence location is 2L:21456113..21457135. Its molecular function is described by: chromatin DNA binding. It is involved in the biological process described with: nucleosome assembly. No alleles ar…
FBgn0259990	11.109	17.607	17.528	21.298	0	12.748	1.09355	0.103604	0.999974		CG42487	LINK	This gene is referred to in FlyBase by the symbol Dmel\CG42487 (FBgn0259990). It is a protein_coding_gene from Dmel. It has one annotated transcript and one polypeptide. Gene sequence location is 3R:27957356..27959245. Its molecular function is described by: . It is involved in the biological process described with: . No alleles are reported. Summary of modENCODE Temporal Expression Profile: Temp…
FBgn0053886	2.408	10.728	6.018	7.875	1.807	4.807	1.09204	0.230571	0.999974		His2B:CG33886	LINK	The gene His2B:CG33886 is referred to in FlyBase by the symbol Dmel\His2B:CG33886 (CG33886, FBgn0053886). It is a protein_coding_gene from Dmel. It has one annotated transcript and one polypeptide. Gene sequence location is 2L:21492700..21493294. Its molecular function is described by: DNA binding; protein heterodimerization activity. It is involved in the biological process described with: chrom…
FBgn0260454	31.478	27.861	26.419	25.472	17.618	18.238	1.09107	0.0112797	0.964015		CG17139	LINK	This gene is referred to in FlyBase by the symbol Dmel\CG17139 (FBgn0260454). It is a protein_coding_gene from Dmel. It has one annotated transcript and one polypeptide. Gene sequence location is 2L:10843014..10845664. Its molecular function is described by: voltage-gated anion channel activity. It is involved in the biological process described with: anion transmembrane transport. One allele is …
FBgn0013725	19	26	16.173	24.003	9	10	1.0895	0.0282274	0.999974		phyl	LINK	The gene phyllopod is referred to in FlyBase by the symbol Dmel\phyl (CG10108, FBgn0013725). It is a protein_coding_gene from Dmel. It has one annotated transcript and one polypeptide. Gene sequence location is 2R:14427336..14432337. Its molecular function is described by: protein binding; ubiquitin ligase-substrate adaptor activity. It is involved in the biological process described with 13 uniq…
FBgn0052814	2	1	0	0	2.129	0	1.08904	0.607575			CG32814	LINK	This gene is referred to in FlyBase by the symbol Dmel\CG32814 (FBgn0052814). It is a protein_coding_gene from Dmel. It has one annotated transcript and one polypeptide. Gene sequence location is X:1019795..1026700. Its molecular function is described by: . It is involved in the biological process described with: . 6 alleles are reported. No phenotypic data is available. No phenotypic class data …
FBgn0032535	3	5.007	0	1	2.005	2.007	1.08848	0.41846	0.999974		Ance-2	LINK	The gene Ance-2 is referred to in FlyBase by the symbol Dmel\Ance-2 (CG16869, FBgn0032535). It is a protein_coding_gene from Dmel. It has one annotated transcript and one polypeptide. Gene sequence location is 2L:13909333..13911719. Its molecular function is described by: metallopeptidase activity. The biological processes in which it is involved are not known. 2 alleles are reported. No phenotyp…
FBgn0286933	5	6	2	4	1	4	1.08626	0.28113	0.999974		CG46430	LINK	This gene is referred to in FlyBase by the symbol Dmel\CG46430 (FBgn0286933). It is a protein_coding_gene from Dmel. It has one annotated transcript and one polypeptide. Gene sequence location is 3L:10478514..10479447. Its molecular function is unknown. The biological processes in which it is involved are not known. No alleles are reported.
FBgn0023495	8	10	0	4	1.003	7	1.08503	0.2748	0.999974		Lip3	LINK	The gene Lip3 is referred to in FlyBase by the symbol Dmel\Lip3 (CG8823, FBgn0023495). It is a protein_coding_gene from Dmel. It has one annotated transcript and one polypeptide. Gene sequence location is 3R:13370240..13371904. Its molecular function is described by: sterol esterase activity; triglyceride lipase activity. It is involved in the biological process described with: lipid catabolic pr…
FBgn0023495	8	10	0	4	1.003	7	1.08503	0.2748	0.999974		Lip3	LINK	The gene Lip3 is referred to in FlyBase by the symbol Dmel\Lip3 (CG8823, FBgn0023495). It is a protein_coding_gene from Dmel. It has one annotated transcript and one polypeptide. Gene sequence location is 3R:13370240..13371904. Its molecular function is described by: sterol esterase activity; triglyceride lipase activity. It is involved in the biological process described with: lipid catabolic pr…
FBgn0032057	1	4	3	0	0	5	1.08453	0.448072	0.999974		CG9287	LINK	This gene is referred to in FlyBase by the symbol Dmel\CG9287 (FBgn0032057). It is a protein_coding_gene from Dmel. It has one annotated transcript and one polypeptide. Gene sequence location is 2L:8676777..8679812. Its molecular function is unknown. The biological processes in which it is involved are not known. 4 alleles are reported. No phenotypic data is available. The phenotypic classes of a…
FBgn0040682	0	0	4	1	1	1	1.08225	0.549845			CG14664	LINK	This gene is referred to in FlyBase by the symbol Dmel\CG14664 (FBgn0040682). It is a protein_coding_gene from Dmel. It has 3 annotated transcripts and 3 polypeptides (1 unique). Gene sequence location is 3R:5224139..5225542. Its molecular function is unknown. The biological processes in which it is involved are not known. One allele is reported. No phenotypic data is available. No phenotypic cla…
FBgn0039092	7	6.012	5	6	2	5	1.08208	0.197398	0.999974		CG16723	LINK	This gene is referred to in FlyBase by the symbol Dmel\CG16723 (FBgn0039092). It is a protein_coding_gene from Dmel. It has one annotated transcript and one polypeptide. Gene sequence location is 3R:23593625..23596273. Its molecular function is described by: transferase activity, transferring acyl groups other than amino-acyl groups. The biological processes in which it is involved are not known.…
FBgn0033355	1	4	1	3	1	0	1.07465	0.49009	0.999974		CG13748	LINK	This gene is referred to in FlyBase by the symbol Dmel\CG13748 (FBgn0033355). It is a protein_coding_gene from Dmel. It has one annotated transcript and one polypeptide. Gene sequence location is 2R:8940415..8941136. Its molecular function is described by: serine-type endopeptidase inhibitor activity. The biological processes in which it is involved are not known. 4 alleles are reported. No pheno…
FBgn0051812	25.456	20.801	31.285	29.921	15.388	13.327	1.06949	0.0227612	0.999974		Tsen2	LINK	The gene tRNA splicing endonuclease subunit 2 is referred to in FlyBase by the symbol Dmel\Tsen2 (CG31812, FBgn0051812). It is a protein_coding_gene from Dmel. It has one annotated transcript and one polypeptide. Gene sequence location is 2L:16729777..16731199. Its molecular function is described by: nucleic acid binding; tRNA-intron endonuclease activity. It is involved in the biological process…
FBgn0038439	2	3	1	1	1	2	1.0689	0.4566	0.999974		Cad89D	LINK	The gene Cadherin 89D is referred to in FlyBase by the symbol Dmel\Cad89D (CG14900, FBgn0038439). It is a protein_coding_gene from Dmel. It has one annotated transcript and one polypeptide. Gene sequence location is 3R:16484566..16495422. Its molecular function is described by: calcium ion binding. It is involved in the biological process described with: cell-cell adhesion; homophilic cell adhesi…
FBgn0029518	6.283	6.039	2	5	2	3	1.06784	0.265337	0.999974		CG13376	LINK	This gene is referred to in FlyBase by the symbol Dmel\CG13376 (FBgn0029518). It is a protein_coding_gene from Dmel. It has 3 annotated transcripts and 3 polypeptides (all unique). Gene sequence location is X:265724..267028. Its molecular function is described by: . It is involved in the biological process described with: . One allele is reported. No phenotypic data is available. No phenotypic cl…
FBgn0030647	9	13	8	10	6	5	1.06754	0.105798	0.999974		CG6324	LINK	This gene is referred to in FlyBase by the symbol Dmel\CG6324 (FBgn0030647). It is a protein_coding_gene from Dmel. It has 2 annotated transcripts and 2 polypeptides (all unique). Gene sequence location is X:15476091..15481722. Its molecular function is unknown. The biological processes in which it is involved are not known. 2 alleles are reported. No phenotypic data is available. The phenotypic …
FBgn0028573	2	3	2	3	1	1	1.06749	0.418953	0.999974		prc	LINK	The gene pericardin is referred to in FlyBase by the symbol Dmel\prc (CG5700, FBgn0028573). It is a protein_coding_gene from Dmel. It has one annotated transcript and one polypeptide. Gene sequence location is 3L:11958872..11966131. Its molecular function is described by: extracellular matrix structural constituent. It is involved in the biological process described with: basement membrane assemb…
FBgn0035844	0	4	2	3	0	1.062	1.06523	0.512389			CG13676	LINK	This gene is referred to in FlyBase by the symbol Dmel\CG13676 (FBgn0035844). It is a protein_coding_gene from Dmel. It has 2 annotated transcripts and 2 polypeptides (all unique). Gene sequence location is 3L:8141868..8151813. Its molecular function is described by: chitin binding. It is involved in the biological process described with: chitin metabolic process. 6 alleles are reported. No pheno…
FBgn0004052	0	3.144	2	0	1	2.029	1.06446	0.538799			Z600	LINK	The gene Z600 is referred to in FlyBase by the symbol Dmel\Z600 (CG17962, FBgn0004052). It is a protein_coding_gene from Dmel. It has one annotated transcript and one polypeptide. Gene sequence location is 3L:15509061..15509513. Its molecular function is described by: cyclin binding; protein binding. It is involved in the biological process described with: negative regulation of G2/M transition o…
FBgn0040571	5	11.298	7	2	4	9	1.06421	0.181431	0.999974		CG17193	LINK	This gene is referred to in FlyBase by the symbol Dmel\CG17193 (FBgn0040571). It is a protein_coding_gene from Dmel. It has 3 annotated transcripts and 3 polypeptides (1 unique). Gene sequence location is 3R:20036421..20056097. Its molecular function is described by: . It is involved in the biological process described with: . 6 alleles are reported. No phenotypic data is available. The phenotypi…
FBgn0052640	100.617	161.119	96.142	63.086	82.69	94.999	1.06392	0.000189791	0.0579102		CG32640	LINK	This gene is referred to in FlyBase by the symbol Dmel\CG32640 (FBgn0052640). It is a protein_coding_gene from Dmel. It has one annotated transcript and one polypeptide. Gene sequence location is X:13178005..13178523. Its molecular function is unknown. The biological processes in which it is involved are not known. One allele is reported. No phenotypic data is available. The phenotypic classes of…
FBgn0039489	13	11	11	8	9	8	1.06285	0.0843501	0.999974		CG5880	LINK	This gene is referred to in FlyBase by the symbol Dmel\CG5880 (FBgn0039489). It is a protein_coding_gene from Dmel. It has one annotated transcript and one polypeptide. Gene sequence location is 3R:27116745..27118532. Its molecular function is described by: palmitoyltransferase activity; protein-cysteine S-palmitoyltransferase activity. It is involved in the biological process described with: pro…
FBgn0036923	1	2	0	1	0	1	1.05957	0.621385			CG17732	LINK	This gene is referred to in FlyBase by the symbol Dmel\CG17732 (FBgn0036923). It is a protein_coding_gene from Dmel. It has one annotated transcript and one polypeptide. Gene sequence location is 3L:19981685..19984191. Its molecular function is unknown. The biological processes in which it is involved are not known. 3 alleles are reported. No phenotypic data is available. The phenotypic classes o…
FBgn0266137	1	9	7	4	6	1.003	1.05914	0.269309	0.999974		Dop1R2	LINK	The gene Dopamine 1-like receptor 2 is referred to in FlyBase by the symbol Dmel\Dop1R2 (CG18741, FBgn0266137). It is a protein_coding_gene from Dmel. It has 3 annotated transcripts and 3 polypeptides (all unique). Gene sequence location is 3R:29630304..29659984. Its molecular function is described by 6 unique terms, many of which group under: molecular transducer activity; transmembrane signalin…
FBgn0266811	0	1	2	0	0	2	1.05506	0.628189			CG45273	LINK	This gene is referred to in FlyBase by the symbol Dmel\CG45273 (FBgn0266811). It is a protein_coding_gene from Dmel. It has one annotated transcript and one polypeptide. Gene sequence location is 2R:17131116..17131552. Its molecular function is unknown. The biological processes in which it is involved are not known. No alleles are reported.
FBgn0042146	3	8	8	10	1	3	1.05149	0.231971	0.999974		CG18823	LINK	This gene is referred to in FlyBase by the symbol Dmel\CG18823 (FBgn0042146). It is a protein_coding_gene from Dmel. It has one annotated transcript and one polypeptide. Gene sequence location is X:990518..991184. Its molecular function is described by: nucleic acid binding. The biological processes in which it is involved are not known. 5 alleles are reported. No phenotypic data is available. Th…
FBgn0032086	3	4.95	3.161	8.012	0	0	1.05066	0.405656	0.999974		CG17906	LINK	This gene is referred to in FlyBase by the symbol Dmel\CG17906 (FBgn0032086). It is a protein_coding_gene from Dmel. It has one annotated transcript and one polypeptide. Gene sequence location is 2L:8994391..8995617. Its molecular function is unknown. The biological processes in which it is involved are not known. 3 alleles are reported. No phenotypic data is available. The phenotypic class of al…
FBgn0261675	52.588	117.118	43	60.009	32.413	51	1.04689	0.00108965	0.219398		Npc1b	LINK	The gene Niemann-Pick type C-1b is referred to in FlyBase by the symbol Dmel\Npc1b (CG12092, FBgn0261675). It is a protein_coding_gene from Dmel. It has one annotated transcript and one polypeptide. Gene sequence location is X:20934869..20939503. Its molecular function is unknown. It is involved in the biological process described with: intestinal cholesterol absorption; peripheral nervous system…
FBgn0053542	1	1	1	0	2	0	1.04671	0.608994			upd3	LINK	The gene unpaired 3 is referred to in FlyBase by the symbol Dmel\upd3 (CG33542, FBgn0053542). It is a protein_coding_gene from Dmel. It has one annotated transcript and one polypeptide. Gene sequence location is X:18277233..18284596. Its molecular function is described by: cytokine activity. It is involved in the biological process described with 8 unique terms, many of which group under: biologi…
FBgn0029880	0	6	1	1	2	1	1.04482	0.496377	0.999974		CG14443	LINK	This gene is referred to in FlyBase by the symbol Dmel\CG14443 (FBgn0029880). It is a protein_coding_gene from Dmel. It has one annotated transcript and one polypeptide. Gene sequence location is X:6633959..6636169. Its molecular function is described by: RNA binding; helicase activity; RNA helicase activity; ATP binding. It is involved in the biological process described with: RNA interference. …
FBgn0039780	1	5	2	1	3	1	1.04475	0.426477	0.999974		PH4alphaNE1	LINK	The gene prolyl-4-hydroxylase-alpha NE1 is referred to in FlyBase by the symbol Dmel\PH4alphaNE1 (CG9728, FBgn0039780). It is a protein_coding_gene from Dmel. It has one annotated transcript and one polypeptide. Gene sequence location is 3R:30496751..30500326. Its molecular function is described by: iron ion binding; L-ascorbic acid binding; procollagen-proline 4-dioxygenase activity; oxidoreduct…
FBgn0038412	24	39	29	33	15	18.002	1.04357	0.0103118	0.933417		Zip89B	LINK	The gene Zinc/iron regulated transporter-related protein 89B is referred to in FlyBase by the symbol Dmel\Zip89B (CG6898, FBgn0038412). It is a protein_coding_gene from Dmel. It has one annotated transcript and one polypeptide. Gene sequence location is 3R:16305758..16308700. Its molecular function is described by: zinc ion transmembrane transporter activity. It is involved in the biological proc…
FBgn0052564	8	6	7	9	4	3	1.04245	0.181865	0.999974		CG32564	LINK	This gene is referred to in FlyBase by the symbol Dmel\CG32564 (FBgn0052564). It is a protein_coding_gene from Dmel. It has one annotated transcript and one polypeptide. Gene sequence location is X:17206407..17207854. Its molecular function is described by: structural constituent of chitin-based cuticle; RNA polymerase II core promoter sequence-specific DNA binding; transcription coactivator acti…
FBgn0029707	0	4	1	1	1	1	1.04128	0.54806			CG12688	LINK	This gene is referred to in FlyBase by the symbol Dmel\CG12688 (FBgn0029707). It is a protein_coding_gene from Dmel. It has one annotated transcript and one polypeptide. Gene sequence location is X:4380758..4382466. Its molecular function is unknown. The biological processes in which it is involved are not known. 2 alleles are reported. No phenotypic data is available. The phenotypic class of all…
FBgn0030928	6	9	4	4	6	3	1.03881	0.210054	0.999974		CG15044	LINK	This gene is referred to in FlyBase by the symbol Dmel\CG15044 (FBgn0030928). It is a protein_coding_gene from Dmel. It has one annotated transcript and one polypeptide. Gene sequence location is X:18491185..18492006. Its molecular function is unknown. The biological processes in which it is involved are not known. 4 alleles are reported. No phenotypic data is available. The phenotypic class of a…
FBgn0035886	17	24.995	10.002	9	10	16.006	1.03596	0.0568269	0.999974		Jon66Ci	LINK	The gene Jonah 66Ci is referred to in FlyBase by the symbol Dmel\Jon66Ci (CG7118, FBgn0035886). It is a protein_coding_gene from Dmel. It has one annotated transcript and one polypeptide. Gene sequence location is 3L:8391540..8392377. Its molecular function is described by: serine-type endopeptidase activity; endopeptidase activity. It is involved in the biological process described with: proteol…
FBgn0053192	102.987	228.842	168.955	112.873	136.379	91.6	1.03388	0.000109112	0.0401083	UP	MtnD	LINK	The gene Metallothionein D is referred to in FlyBase by the symbol Dmel\MtnD (CG33192, FBgn0053192). It is a protein_coding_gene from Dmel. It has one annotated transcript and one polypeptide. Gene sequence location is 3R:20534962..20535301. Its molecular function is described by: metal ion binding. It is involved in the biological process described with: response to copper ion; response to metal…
FBgn0038380	3	4	3	2.063	3	2	1.03343	0.345996	0.999974		CG14877	LINK	This gene is referred to in FlyBase by the symbol Dmel\CG14877 (FBgn0038380). It is a protein_coding_gene from Dmel. It has one annotated transcript and one polypeptide. Gene sequence location is 3R:15889194..15896078. Its molecular function is unknown. The biological processes in which it is involved are not known. 3 alleles are reported. No phenotypic data is available. The phenotypic classes o…
FBgn0035812	181.92	50.411	122.239	200.959	53.442	60.512	1.0315	0.218032	0.999974		CG7457	LINK	This gene is referred to in FlyBase by the symbol Dmel\CG7457 (FBgn0035812). It is a protein_coding_gene from Dmel. It has 2 annotated transcripts and 2 polypeptides (1 unique). Gene sequence location is 3L:7719899..7726473. Its molecular function is described by: . It is involved in the biological process described with: . 5 alleles are reported. No phenotypic data is available. The phenotypic c…
FBgn0037165	7	18	19	11	8.147	12	1.02526	0.0732517	0.999974		CG11437	LINK	This gene is referred to in FlyBase by the symbol Dmel\CG11437 (FBgn0037165). It is a protein_coding_gene from Dmel. It has one annotated transcript and one polypeptide. Gene sequence location is 3L:22468862..22469853. Its molecular function is described by: lipid phosphatase activity; phosphatidate phosphatase activity; phosphatase activity. It is involved in the biological process described wit…
FBgn0037165	7	18	19	11	8.147	12	1.02526	0.0732517	0.999974		CG11437	LINK	This gene is referred to in FlyBase by the symbol Dmel\CG11437 (FBgn0037165). It is a protein_coding_gene from Dmel. It has one annotated transcript and one polypeptide. Gene sequence location is 3L:22468862..22469853. Its molecular function is described by: lipid phosphatase activity; phosphatidate phosphatase activity; phosphatase activity. It is involved in the biological process described wit…
FBgn0037165	7	18	19	11	8.147	12	1.02526	0.0732517	0.999974		CG11437	LINK	This gene is referred to in FlyBase by the symbol Dmel\CG11437 (FBgn0037165). It is a protein_coding_gene from Dmel. It has one annotated transcript and one polypeptide. Gene sequence location is 3L:22468862..22469853. Its molecular function is described by: lipid phosphatase activity; phosphatidate phosphatase activity; phosphatase activity. It is involved in the biological process described wit…
FBgn0037165	7	18	19	11	8.147	12	1.02526	0.0732517	0.999974		CG11437	LINK	This gene is referred to in FlyBase by the symbol Dmel\CG11437 (FBgn0037165). It is a protein_coding_gene from Dmel. It has one annotated transcript and one polypeptide. Gene sequence location is 3L:22468862..22469853. Its molecular function is described by: lipid phosphatase activity; phosphatidate phosphatase activity; phosphatase activity. It is involved in the biological process described wit…
FBgn0036390	1.062	1	3.001	3	1.143	0	1.025	0.514269	0.999974		CG13738	LINK	This gene is referred to in FlyBase by the symbol Dmel\CG13738 (FBgn0036390). It is a protein_coding_gene from Dmel. It has one annotated transcript and one polypeptide. Gene sequence location is 3L:13973123..13973477. Its molecular function is described by: . It is involved in the biological process described with: . 3 alleles are reported. No phenotypic data is available. The phenotypic classes…
FBgn0037581	14	25.028	13	12.003	12	12.327	1.0245	0.0463988	0.999974		CG7352	LINK	This gene is referred to in FlyBase by the symbol Dmel\CG7352 (FBgn0037581). It is a protein_coding_gene from Dmel. It has 2 annotated transcripts and 2 polypeptides (all unique). Gene sequence location is 3R:8347579..8349296. Its molecular function is unknown. It is involved in the biological process described with: cilium organization. 4 alleles are reported. No phenotypic data is available. Th…
FBgn0033740	4	12	5	5	7	2	1.02089	0.214649	0.999974		dgt5	LINK	The gene dim gamma-tubulin 5 is referred to in FlyBase by the symbol Dmel\dgt5 (CG8828, FBgn0033740). It is a protein_coding_gene from Dmel. It has 2 annotated transcripts and 2 polypeptides (1 unique). Gene sequence location is 2R:12465678..12471775. Its molecular function is unknown. It is involved in the biological process described with: mitotic spindle organization; regulation of mitotic nuc…
FBgn0029746	34.314	138.057	88.566	63.263	25.662	88.29	1.01552	0.00931659	0.904523		CG15465	LINK	This gene is referred to in FlyBase by the symbol Dmel\CG15465 (FBgn0029746). It is a protein_coding_gene from Dmel. It has 2 annotated transcripts and 2 polypeptides (1 unique). Gene sequence location is X:5085759..5254864. Its molecular function is unknown. The biological processes in which it is involved are not known. 21 alleles are reported. No phenotypic data is available. The phenotypic cl…
FBgn0021767	12	11.072	11	7	6.011	12	1.01334	0.107871	0.999974		org-1	LINK	The gene optomotor-blind-related-gene-1 is referred to in FlyBase by the symbol Dmel\org-1 (CG11202, FBgn0021767). It is a protein_coding_gene from Dmel. It has 2 annotated transcripts and 2 polypeptides (1 unique). Gene sequence location is X:8447691..8455069. Its molecular function is described by: RNA polymerase II transcription regulatory region sequence-specific DNA binding; DNA-binding tran…
FBgn0053847	5.756	8.061	5.668	6.425	4.487	3.77	1.00966	0.224513	0.999974		His2A:CG33847	LINK	The gene His2A:CG33847 is referred to in FlyBase by the symbol Dmel\His2A:CG33847 (CG33847, FBgn0053847). It is a protein_coding_gene from Dmel. It has one annotated transcript and one polypeptide. Gene sequence location is 2L:21508566..21509058. Its molecular function is described by: DNA binding; protein heterodimerization activity. It is involved in the biological process described with: chrom…
FBgn0039283	5	9	5	9	4	1	1.00958	0.237466	0.999974		danr	LINK	The gene distal antenna-related is referred to in FlyBase by the symbol Dmel\danr (CG13651, FBgn0039283). It is a protein_coding_gene from Dmel. It has one annotated transcript and one polypeptide. Gene sequence location is 3R:25138072..25139903. Its molecular function is described by: DNA binding; protein binding; DNA-binding transcription factor activity. It is involved in the biological proces…
FBgn0000071	0	4	2	2	0	2	1.00821	0.528116	0.999974		Ama	LINK	The gene Amalgam is referred to in FlyBase by the symbol Dmel\Ama (CG2198, FBgn0000071). It is a protein_coding_gene from Dmel. It has 3 annotated transcripts and 3 polypeptides (2 unique). Gene sequence location is 3R:6762593..6765261. Its molecular function is unknown. The biological processes in which it is involved are not known. 6 alleles are reported. No phenotypic data is available. The ph…
FBgn0001228	232.753	268.308	533.955	321.384	304.748	167.046	1.00743	0.0707065	0.999974		CG4456	LINK	This gene is referred to in FlyBase by the symbol Dmel\CG4456 (FBgn0001228). It is a protein_coding_gene from Dmel. It has 4 annotated transcripts and 4 polypeptides (1 unique). Gene sequence location is 3L:9372722..9374964. Its molecular function is unknown. The biological processes in which it is involved are not known. 7 alleles are reported. No phenotypic data is available. The phenotypic cla…
FBgn0053870	10.016	12.873	13.783	10.682	6.951	10.653	1.00351	0.0992956	0.999974		His2B:CG33870	LINK	The gene His2B:CG33870 is referred to in FlyBase by the symbol Dmel\His2B:CG33870 (CG33870, FBgn0053870). It is a protein_coding_gene from Dmel. It has one annotated transcript and one polypeptide. Gene sequence location is 2L:21532461..21533055. Its molecular function is described by: protein heterodimerization activity; DNA binding. It is involved in the biological process described with: chrom…
FBgn0029851	23.999	108.087	22	16.167	44	32.001	1.00309	0.0372704	0.999974		CG14445	LINK	This gene is referred to in FlyBase by the symbol Dmel\CG14445 (FBgn0029851). It is a protein_coding_gene from Dmel. It has 4 annotated transcripts and 4 polypeptides (all unique). Gene sequence location is X:6237315..6240558. Its molecular function is unknown. The biological processes in which it is involved are not known. 2 alleles are reported. No phenotypic data is available. The phenotypic c…
FBgn0011277	1	1	2	1	1	1	1.00232	0.546572			HLH4C	LINK	The gene Helix loop helix protein 4C is referred to in FlyBase by the symbol Dmel\HLH4C (CG3052, FBgn0011277). It is a protein_coding_gene from Dmel. It has 2 annotated transcripts and 2 polypeptides (all unique). Gene sequence location is X:4645127..4647414. Its molecular function is described by: DNA-binding transcription factor activity, RNA polymerase II-specific; RNA polymerase II transcript…
FBgn0038113	13	17.477	12	19	4	9	1.00168	0.0886807	0.999974		CG11668	LINK	This gene is referred to in FlyBase by the symbol Dmel\CG11668 (FBgn0038113). It is a protein_coding_gene from Dmel. It has one annotated transcript and one polypeptide. Gene sequence location is 3R:13038375..13040184. Its molecular function is described by: serine-type endopeptidase activity. It is involved in the biological process described with: proteolysis. 3 alleles are reported. No phenoty…
FBgn0036199	262.254	772.666	216.033	197.153	273.712	327.72	1.00094	0.0010902	0.219398		Bmcp	LINK	The gene Bmcp is referred to in FlyBase by the symbol Dmel\Bmcp (CG7314, FBgn0036199). It is a protein_coding_gene from Dmel. It has 2 annotated transcripts and 2 polypeptides (1 unique). Gene sequence location is 3L:11720934..11728118. Its molecular function is described by 7 unique terms, many of which group under: transmembrane transporter activity; transporter activity; dicarboxylic acid tran…
FBgn0035113	53.383	43.801	44.285	52.574	31.282	26.801	0.998648	0.00743049	0.787003		pyx	LINK	The gene pyrexia is referred to in FlyBase by the symbol Dmel\pyx (CG17142, FBgn0035113). It is a protein_coding_gene from Dmel. It has 2 annotated transcripts and 2 polypeptides (all unique). Gene sequence location is 3L:217932..223069. Its molecular function is described by: cation channel activity; calcium channel activity. It is involved in the biological process described with 6 unique terms…
FBgn0263131	8.136	8.117	5.38	9	5	2.007	0.998208	0.206248	0.999974		CG43373	LINK	This gene is referred to in FlyBase by the symbol Dmel\CG43373 (FBgn0263131). It is a protein_coding_gene from Dmel. It has 2 annotated transcripts and 2 polypeptides (all unique). Gene sequence location is 3L:16491838..16543370. Its molecular function is described by: adenylate cyclase activity. It is involved in the biological process described with: cAMP biosynthetic process; adenylate cyclase…
FBgn0261536	48.785	33.446	20.503	33.275	29.347	16.974	0.996555	0.0270658	0.999974		CG42660	LINK	This gene is referred to in FlyBase by the symbol Dmel\CG42660 (FBgn0261536). It is a protein_coding_gene from Dmel. It has 2 annotated transcripts and 2 polypeptides (1 unique). Gene sequence location is 3L:7465509..7468808. Its molecular function is described by: . It is involved in the biological process described with: . One allele is reported. No phenotypic data is available. No phenotypic c…
FBgn0036447	3.092	8.957	5	3	5.169	3	0.996206	0.267941	0.999974		Mgat4b	LINK	The gene alpha-1,3-mannosyl-glycoprotein 4-beta-N-acetylglucosaminyltransferase b is referred to in FlyBase by the symbol Dmel\Magt4b (CG17173, FBgn0036447). It is a protein_coding_gene from Dmel. It has one annotated transcript and one polypeptide. Gene sequence location is 3L:14767703..14769283. Its molecular function is described by: acetylglucosaminyltransferase activity. It is involved in th…
FBgn0036323	5	6	6	7	2	4	0.995135	0.243716	0.999974		CG14118	LINK	This gene is referred to in FlyBase by the symbol Dmel\CG14118 (FBgn0036323). It is a protein_coding_gene from Dmel. It has one annotated transcript and one polypeptide. Gene sequence location is 3L:12892658..12894758. Its molecular function is described by 6 unique terms, many of which group under: catalytic activity; nuclease activity; hydrolase activity, acting on ester bonds; hydrolase activi…
FBgn0053810	0	1.611	3.408	1.555	0	2.245	0.994987	0.583761			His1:CG33810	LINK	The gene His1:CG33810 is referred to in FlyBase by the symbol Dmel\His1:CG33810 (CG33810, FBgn0053810). It is a protein_coding_gene from Dmel. It has one annotated transcript and one polypeptide. Gene sequence location is 2L:21437011..21438033. Its molecular function is described by: chromatin DNA binding. It is involved in the biological process described with: nucleosome assembly. 3 alleles are…
FBgn0037996	5	11	3	4	5	4	0.988513	0.239521	0.999974		CG4830	LINK	This gene is referred to in FlyBase by the symbol Dmel\CG4830 (FBgn0037996). It is a protein_coding_gene from Dmel. It has one annotated transcript and one polypeptide. Gene sequence location is 3R:12208159..12210360. Its molecular function is described by: fatty acid ligase activity; CoA-ligase activity; long-chain fatty acid-CoA ligase activity. It is involved in the biological process describe…
FBgn0035870	2	0	0	2	0	0	0.987384	0.692055			Gr66a	LINK	The gene Gustatory receptor 66a is referred to in FlyBase by the symbol Dmel\Gr66a (CG7189, FBgn0035870). It is a protein_coding_gene from Dmel. It has one annotated transcript and one polypeptide. Gene sequence location is 3L:8305336..8306980. Its molecular function is described by: taste receptor activity. It is involved in the biological process described with 7 unique terms, many of which gro…
FBgn0029995	1	7	5	3	1	5	0.983875	0.346178	0.999974		CG2256	LINK	This gene is referred to in FlyBase by the symbol Dmel\CG2256 (FBgn0029995). It is a protein_coding_gene from Dmel. It has one annotated transcript and one polypeptide. Gene sequence location is X:8084018..8087213. Its molecular function is described by: calcium ion binding. The biological processes in which it is involved are not known. 4 alleles are reported. No phenotypic data is available. Th…
FBgn0004650	6	9	10	9	3	7	0.981018	0.171958	0.999974		fs(1)N	LINK	The gene female sterile (1) Nasrat is referred to in FlyBase by the symbol Dmel\fs(1)N (CG11411, FBgn0004650). It is a protein_coding_gene from Dmel. It has one annotated transcript and one polypeptide. Gene sequence location is X:1322513..1329438. Its molecular function is described by: heparin binding. It is involved in the biological process described with: chorion-containing eggshell formatio…
FBgn0001967	2	7.155	9	4.028	4.029	5.129	0.978647	0.253954	0.999974		NimC3	LINK	The gene Nimrod C3 is referred to in FlyBase by the symbol Dmel\NimC3 (CG16880, FBgn0001967). It is a protein_coding_gene from Dmel. It has one annotated transcript and one polypeptide. Gene sequence location is 2L:14019357..14020208. Its molecular function is described by: . It is involved in the biological process described with: phagocytosis. 7 alleles are reported. No phenotypic data is avail…
FBgn0085310	1	3	2	0	2	2	0.978587	0.507213	0.999974		CG34281	LINK	This gene is referred to in FlyBase by the symbol Dmel\CG34281 (FBgn0085310). It is a protein_coding_gene from Dmel. It has one annotated transcript and one polypeptide. Gene sequence location is 3R:17612887..17613404. Its molecular function is described by: . It is involved in the biological process described with: . 2 alleles are reported. No phenotypic data is available. The phenotypic class o…
FBgn0263047	3.145	9.144	0	4.149	3.174	1.019	0.978372	0.400647	0.999974		CG43342	LINK	This gene is referred to in FlyBase by the symbol Dmel\CG43342 (FBgn0263047). It is a protein_coding_gene from Dmel. It has one annotated transcript and one polypeptide. Gene sequence location is 3R:22381340..22382147. Its molecular function is described by: DNA binding. It is involved in the biological process described with: . 9 alleles are reported. The phenotype of these alleles manifest in: …
FBgn0262570	60.067	86.451	53.651	58.587	38.865	51.931	0.97806	0.00109206	0.219398		CG43110	LINK	This gene is referred to in FlyBase by the symbol Dmel\CG43110 (FBgn0262570). It is a protein_coding_gene from Dmel. It has 2 annotated transcripts and 2 polypeptides (1 unique). Gene sequence location is 2R:17477565..17486220. Its molecular function is described by: serine-type endopeptidase activity. It is involved in the biological process described with: proteolysis. 3 alleles are reported. N…
FBgn0038816	16.484	11.374	15	19.035	9.137	6.413	0.973709	0.0974148	0.999974		Lrrk	LINK	The gene Leucine-rich repeat kinase is referred to in FlyBase by the symbol Dmel\Lrrk (CG5483, FBgn0038816). It is a protein_coding_gene from Dmel. It has 3 annotated transcripts and 3 polypeptides (all unique). Gene sequence location is 3R:20635480..20644279. Its molecular function is described by: Rab GTPase binding; protein binding; protein kinase activity; ATP binding; protein serine/threonin…
FBgn0040069	18	48	30	35	16	19	0.973219	0.0172353	0.999974		vanin-like	LINK	The gene vanin-like is referred to in FlyBase by the symbol Dmel\vanin-like (CG32754, FBgn0040069). It is a protein_coding_gene from Dmel. It has one annotated transcript and one polypeptide. Gene sequence location is X:6200188..6202559. Its molecular function is described by: hydrolase activity; hydrolase activity, acting on carbon-nitrogen (but not peptide) bonds, in linear amides. It is involv…
FBgn0010549	5	8	4	3	7	2	0.971463	0.271691	0.999974		l(2)03659	LINK	The gene lethal (2) 03659 is referred to in FlyBase by the symbol Dmel\l(2)03659 (CG8799, FBgn0010549). It is a protein_coding_gene from Dmel. It has 2 annotated transcripts and 2 polypeptides (all unique). Gene sequence location is 2R:9390165..9395281. Its molecular function is described by: ATP binding; ATPase-coupled transmembrane transporter activity; ATPase activity; efflux transmembrane tra…
FBgn0038870	14.763	10.949	15.695	27.235	1.189	6.604	0.970695	0.17261	0.999974		Oga	LINK	The gene O-GlcNAcase is referred to in FlyBase by the symbol Dmel\Oga (CG5871, FBgn0038870). It is a protein_coding_gene from Dmel. It has one annotated transcript and one polypeptide. Gene sequence location is 3R:21219077..21222843. Its molecular function is described by: beta-N-acetylglucosaminidase activity. It is involved in the biological process described with 7 unique terms, many of which …
FBgn0030377	9	10.017	5	7	4	7	0.970417	0.181842	0.999974		CG1924	LINK	This gene is referred to in FlyBase by the symbol Dmel\CG1924 (FBgn0030377). It is a protein_coding_gene from Dmel. It has one annotated transcript and one polypeptide. Gene sequence location is X:12176440..12178626. Its molecular function is described by: unfolded protein binding; calcium ion binding. It is involved in the biological process described with: endoplasmic reticulum unfolded protein…
FBgn0030377	9	10.017	5	7	4	7	0.970417	0.181842	0.999974		CG1924	LINK	This gene is referred to in FlyBase by the symbol Dmel\CG1924 (FBgn0030377). It is a protein_coding_gene from Dmel. It has one annotated transcript and one polypeptide. Gene sequence location is X:12176440..12178626. Its molecular function is described by: unfolded protein binding; calcium ion binding. It is involved in the biological process described with: endoplasmic reticulum unfolded protein…
FBgn0051634	1	2.03	1.077	2.158	1	0	0.969904	0.58133			Oatp26F	LINK	The gene Organic anion transporting polypeptide 26F is referred to in FlyBase by the symbol Dmel\Oatp26F (CG31634, FBgn0051634). It is a protein_coding_gene from Dmel. It has one annotated transcript and one polypeptide. Gene sequence location is 2L:6625138..6632407. Its molecular function is described by: active transmembrane transporter activity; sodium-independent organic anion transmembrane t…
FBgn0052797	3	3	2	2	2	2	0.96779	0.419174	0.999974		CG32797	LINK	This gene is referred to in FlyBase by the symbol Dmel\CG32797 (FBgn0052797). It is a protein_coding_gene from Dmel. It has one annotated transcript and one polypeptide. Gene sequence location is X:2424925..2425855. Its molecular function is described by: . It is involved in the biological process described with: . 2 alleles are reported. No phenotypic data is available. No phenotypic class data …
FBgn0033629	4	12	10	8	5	6	0.962848	0.175013	0.999974		Tsp47F	LINK	The gene Tetraspanin 47F is referred to in FlyBase by the symbol Dmel\Tsp47F (CG9033, FBgn0033629). It is a protein_coding_gene from Dmel. It has one annotated transcript and one polypeptide. Gene sequence location is 2R:11377193..11379177. Its molecular function is described by: . The biological processes in which it is involved are not known. 4 alleles are reported. The phenotypes of these alle…
FBgn0030587	0	3	3	0	1	3	0.960297	0.541054	0.999974		CG9522	LINK	This gene is referred to in FlyBase by the symbol Dmel\CG9522 (FBgn0030587). It is a protein_coding_gene from Dmel. It has one annotated transcript and one polypeptide. Gene sequence location is X:14846472..14848808. Its molecular function is described by: oxidoreductase activity; oxidoreductase activity, acting on CH-OH group of donors; flavin adenine dinucleotide binding. It is involved in the …
FBgn0004898	1	3	0	3	0	0	0.960268	0.634579			fd96Cb	LINK	The gene forkhead domain 96Cb is referred to in FlyBase by the symbol Dmel\fd96Cb (CG11922, FBgn0004898). It is a protein_coding_gene from Dmel. It has one annotated transcript and one polypeptide. Gene sequence location is 3R:25095012..25096099. Its molecular function is described by: sequence-specific DNA binding; DNA-binding transcription factor activity, RNA polymerase II-specific. It is invo…
FBgn0028658	58.693	20.413	59.487	96.977	22.587	11.235	0.959606	0.326774	0.999974		Adat1	LINK	The gene Adenosine deaminase, tRNA-specific 1 is referred to in FlyBase by the symbol Dmel\Adat1 (CG16889, FBgn0028658). It is a protein_coding_gene from Dmel. It has 2 annotated transcripts and 2 polypeptides (1 unique). Gene sequence location is 2L:13808360..13811474. Its molecular function is described by: RNA binding; double-stranded RNA binding; double-stranded RNA adenosine deaminase activi…
FBgn0038608	5	8.172	4	7	0	6	0.958597	0.297498	0.999974		WRNexo	LINK	The gene WRN exonuclease is referred to in FlyBase by the symbol Dmel\WRNexo (CG7670, FBgn0038608). It is a protein_coding_gene from Dmel. It has 3 annotated transcripts and 3 polypeptides (all unique). Gene sequence location is 3R:18364244..18366162. Its molecular function is described by: single-stranded DNA 3'-5' exodeoxyribonuclease activity; 3'-5' exonuclease activity; nucleic acid binding; …
FBgn0026398	1	1	2	0	0	3	0.955157	0.593832			Or22a	LINK	The gene Odorant receptor 22a is referred to in FlyBase by the symbol Dmel\Or22a (CG12193, FBgn0026398). It is a protein_coding_gene from Dmel. It has one annotated transcript and one polypeptide. Gene sequence location is 2L:1520491..1522156. Its molecular function is described by: odorant binding; transmembrane signaling receptor activity; olfactory receptor activity. It is involved in the biol…
FBgn0040984	1	1.018	2.302	0	0	3.312	0.955157	0.593832			CG4440	LINK	This gene is referred to in FlyBase by the symbol Dmel\CG4440 (FBgn0040984). It is a protein_coding_gene from Dmel. It has 2 annotated transcripts and 2 polypeptides (1 unique). Gene sequence location is 2L:16329925..16330521. Its molecular function is unknown. The biological processes in which it is involved are not known. 2 alleles are reported. No phenotypic data is available. The phenotypic c…
FBgn0041246	12.233	2.1	7	8.237	8.669	2.051	0.954656	0.253965	0.999974		Gr32a	LINK	The gene Gustatory receptor 32a is referred to in FlyBase by the symbol Dmel\Gr32a (CG14916, FBgn0041246). It is a protein_coding_gene from Dmel. It has one annotated transcript and one polypeptide. Gene sequence location is 2L:11114014..11115823. Its molecular function is described by: taste receptor activity. It is involved in the biological process described with: sensory perception of bitter …
FBgn0267652	11.558	21.198	10.512	10.831	16.422	4.291	0.953796	0.116163	0.999974		pre-mod(mdg4)-N	LINK	This gene is referred to in FlyBase by the symbol Dmel\pre-mod(mdg4)-N (CG45990, FBgn0267652). It is a protein_coding_gene from Dmel. It has 2 annotated transcripts and 2 polypeptides (1 unique). Gene sequence location is 3R:21370918..21373575. Its molecular function is described by: . It is involved in the biological process described with: . No alleles are reported.
FBgn0029939	18	43	22	17	16	26.999	0.951794	0.029305	0.999974		CG9650	LINK	This gene is referred to in FlyBase by the symbol Dmel\CG9650 (FBgn0029939). It is a protein_coding_gene from Dmel. It has 5 annotated transcripts and 5 polypeptides (all unique). Gene sequence location is X:7137723..7241932. Its molecular function is described by: sequence-specific DNA binding; DNA-binding transcription factor activity. It is involved in the biological process described with: ne…
FBgn0035179	8	24.597	9	11	6	12.118	0.951629	0.109683	0.999974		CG12038	LINK	This gene is referred to in FlyBase by the symbol Dmel\CG12038 (FBgn0035179). It is a protein_coding_gene from Dmel. It has one annotated transcript and one polypeptide. Gene sequence location is 3L:993983..995703. Its molecular function is described by: . It is involved in the biological process described with: . 4 alleles are reported. No phenotypic data is available. The phenotypic class of al…
FBgn0032507	31	77.688	60	35	53.001	32	0.95122	0.00838544	0.852043		CG9377	LINK	This gene is referred to in FlyBase by the symbol Dmel\CG9377 (FBgn0032507). It is a protein_coding_gene from Dmel. It has one annotated transcript and one polypeptide. Gene sequence location is 2L:13359901..13361565. Its molecular function is unknown. It is involved in the biological process described with: proteolysis. 5 alleles are reported. No phenotypic data is available. The phenotypic clas…
FBgn0032620	6	12.155	9	14.349	5	2	0.950555	0.192526	0.999974		CG12288	LINK	This gene is referred to in FlyBase by the symbol Dmel\CG12288 (FBgn0032620). It is a protein_coding_gene from Dmel. It has one annotated transcript and one polypeptide. Gene sequence location is 2L:16900535..16902218. Its molecular function is described by: nucleic acid binding; mRNA binding. The biological processes in which it is involved are not known. 2 alleles are reported. No phenotypic da…
FBgn0266721	11	14.005	8	10	6	9	0.948465	0.126751	0.999974		gammaSnap2	LINK	The gene gamma Soluble NSF attachment protein 2 is referred to in FlyBase by the symbol Dmel\gammaSnap2 (CG6208, FBgn0266721). It is a protein_coding_gene from Dmel. It has one annotated transcript and one polypeptide. Gene sequence location is 3R:10120399..10121400. Its molecular function is described by: soluble NSF attachment protein activity; syntaxin binding. It is involved in the biological…
FBgn0052569	1	2	0	0	0	2.065	0.947086	0.669332			TwdlZ	LINK	The gene TweedleZ is referred to in FlyBase by the symbol Dmel\TwdlZ (CG32569, FBgn0052569). It is a protein_coding_gene from Dmel. It has one annotated transcript and one polypeptide. Gene sequence location is X:16738178..16738868. Its molecular function is described by: structural constituent of chitin-based cuticle. It is involved in the biological process described with: body morphogenesis; c…
FBgn0261963	8	22.002	11	14	6	10	0.946567	0.103553	0.999974		mid	LINK	The gene midline is referred to in FlyBase by the symbol Dmel\mid (CG6634, FBgn0261963). It is a protein_coding_gene from Dmel. It has 2 annotated transcripts and 2 polypeptides (1 unique). Gene sequence location is 2L:5461639..5467610. Its molecular function is described by: DNA-binding transcription repressor activity, RNA polymerase II-specific; RNA polymerase II transcription corepressor bind…
FBgn0031610	15	11.981	11	10.001	11.734	8.281	0.94504	0.11367	0.999974		Paris	LINK	This gene is referred to in FlyBase by the symbol Dmel\CG15436 (FBgn0031610). It is a protein_coding_gene from Dmel. It has one annotated transcript and one polypeptide. Gene sequence location is 2L:4463611..4465075. Its molecular function is described by: zinc ion binding; DNA binding; DNA-binding transcription activator activity, RNA polymerase II-specific; RNA polymerase II cis-regulatory regi…
FBgn0262874	4	1	4	0	5.95	2	0.943265	0.43758	0.999974		CG43229	LINK	This gene is referred to in FlyBase by the symbol Dmel\CG43229 (FBgn0262874). It is a protein_coding_gene from Dmel. It has 2 annotated transcripts and 2 polypeptides (all unique). Gene sequence location is X:18138542..18139000. Its molecular function is described by: . It is involved in the biological process described with: . 2 alleles are reported. No phenotypic data is available. No phenotypi…
FBgn0284080	21.841	12.856	14.471	14.901	11.855	13.833	0.939212	0.0874589	0.999974		CG46302	LINK	This gene is referred to in FlyBase by the symbol Dmel\CG46302 (FBgn0284080). It is a protein_coding_gene from Dmel. It has one annotated transcript and one polypeptide. Gene sequence location is 2R:854814..855571. Its molecular function is unknown. The biological processes in which it is involved are not known. No alleles are reported.
FBgn0003117	4	9	6	5	4.001	5	0.938595	0.244847	0.999974		pnr	LINK	The gene pannier is referred to in FlyBase by the symbol Dmel\pnr (CG3978, FBgn0003117). It is a protein_coding_gene from Dmel. It has 4 annotated transcripts and 4 polypeptides (3 unique). Gene sequence location is 3R:16026079..16041796. Its molecular function is described by 7 unique terms, many of which group under: binding; protein binding; transcription factor binding; repressing transcripti…
FBgn0035875	4	11	8	7	5	5	0.938109	0.207092	0.999974		Cpr66Cb	LINK	The gene Cuticular protein 66Cb is referred to in FlyBase by the symbol Dmel\Cpr66Cb (CG7076, FBgn0035875). It is a protein_coding_gene from Dmel. It has one annotated transcript and one polypeptide. Gene sequence location is 3L:8336672..8338595. Its molecular function is described by: structural constituent of cuticle; structural constituent of chitin-based larval cuticle. It is involved in the …
FBgn0036950	2	4	2	3	2	1	0.934344	0.446759	0.999974		CG6996	LINK	This gene is referred to in FlyBase by the symbol Dmel\CG6996 (FBgn0036950). It is a protein_coding_gene from Dmel. It has 2 annotated transcripts and 2 polypeptides (1 unique). Gene sequence location is 3L:20207534..20209600. Its molecular function is described by: chitin binding. It is involved in the biological process described with: chitin metabolic process. 4 alleles are reported. No phenot…
FBgn0266100	14	24.579	8	13	9	12	0.93111	0.0907932	0.999974		CG44837	LINK	This gene is referred to in FlyBase by the symbol Dmel\CG44837 (FBgn0266100). It is a protein_coding_gene from Dmel. It has 3 annotated transcripts and 3 polypeptides (all unique). Gene sequence location is 3L:11850645..11938872. Its molecular function is described by: dipeptidase activity; beta-lactamase activity. It is involved in the biological process described with: proteolysis. 18 alleles a…
FBgn0035861	1	15.681	8	8	2.714	7	0.930451	0.261252	0.999974		CG7213	LINK	This gene is referred to in FlyBase by the symbol Dmel\CG7213 (FBgn0035861). It is a protein_coding_gene from Dmel. It has one annotated transcript and one polypeptide. Gene sequence location is 3L:8231814..8240601. Its molecular function is unknown. The biological processes in which it is involved are not known. 6 alleles are reported. The phenotype of these alleles manifest in: mesothoracic ter…
FBgn0034558	3	5	2	6	0	2.06	0.930049	0.42667	0.999974		Cib2	LINK	The gene Calcium and integrin binding family member 2 is referred to in FlyBase by the symbol Dmel\Cib2 (CG9236, FBgn0034558). It is a protein_coding_gene from Dmel. It has one annotated transcript and one polypeptide. Gene sequence location is 2R:20879930..20882663. Its molecular function is described by: calcium ion binding; calcium-dependent protein serine/threonine phosphatase activity. It is…
FBgn0035645	3	4	5	7	0	3	0.928449	0.379507	0.999974		CG5592	LINK	This gene is referred to in FlyBase by the symbol Dmel\CG5592 (FBgn0035645). It is a protein_coding_gene from Dmel. It has one annotated transcript and one polypeptide. Gene sequence location is 3L:5897638..5899395. Its molecular function is described by: transmembrane transporter activity. It is involved in the biological process described with: transmembrane transport. 3 alleles are reported. N…
FBgn0052671	2.442	0	4.435	6.926	0	0	0.926883	0.555629	0.999974		Rab9Fa	LINK	The gene Rab at 9Fa is referred to in FlyBase by the symbol Dmel\Rab9Fa (CG32671, FBgn0052671). It is a protein_coding_gene from Dmel. It has one annotated transcript and one polypeptide. Gene sequence location is X:10950160..10951030. Its molecular function is described by: GTP binding; GTPase activity. It is involved in the biological process described with 7 unique terms, many of which group u…
FBgn0261842	1.668	10.14	11.92	11.921	5.852	1.836	0.922765	0.291162	0.999974		pre-mod(mdg4)-AE	LINK	This gene is referred to in FlyBase by the symbol Dmel\pre-mod(mdg4)-AE (CG42774, FBgn0261842). It is a protein_coding_gene from Dmel. It has 2 annotated transcripts and 2 polypeptides (1 unique). Gene sequence location is 3R:21365609..21368279. Its molecular function is described by: . It is involved in the biological process described with: . 2 alleles are reported. No phenotypic data is availa…
FBgn0053892	2.377	8.911	1.114	0	4.525	3.09	0.918914	0.448027	0.999974		His2B:CG33892	LINK	The gene His2B:CG33892 is referred to in FlyBase by the symbol Dmel\His2B:CG33892 (CG33892, FBgn0053892). It is a protein_coding_gene from Dmel. It has one annotated transcript and one polypeptide. Gene sequence location is 2L:21477461..21478055. Its molecular function is described by: DNA binding; protein heterodimerization activity. It is involved in the biological process described with: chrom…
FBgn0033601	1	2	1	1	0	2	0.918749	0.599341			Cpr47Ed	LINK	The gene Cuticular protein 47Ed is referred to in FlyBase by the symbol Dmel\Cpr47Ed (CG9076, FBgn0033601). It is a protein_coding_gene from Dmel. It has one annotated transcript and one polypeptide. Gene sequence location is 2R:11261079..11261806. Its molecular function is described by: structural constituent of cuticle; structural constituent of chitin-based larval cuticle. It is involved in th…
FBgn0030938	1	5.047	0	2	2	0	0.915806	0.57609			CG15047	LINK	This gene is referred to in FlyBase by the symbol Dmel\CG15047 (FBgn0030938). It is a protein_coding_gene from Dmel. It has one annotated transcript and one polypeptide. Gene sequence location is X:18528683..18529593. Its molecular function is unknown. The biological processes in which it is involved are not known. 3 alleles are reported. No phenotypic data is available. The phenotypic classes of…
FBgn0041709	3	4	1	2	2	2	0.915606	0.454087	0.999974		yellow-g	LINK	The gene yellow-g is referred to in FlyBase by the symbol Dmel\yellow-g (CG5717, FBgn0041709). It is a protein_coding_gene from Dmel. It has one annotated transcript and one polypeptide. Gene sequence location is 3L:2269881..2272769. Its molecular function is unknown. The biological processes in which it is involved are not known. 7 alleles are reported. The phenotypes of these alleles manifest i…
FBgn0260011	3	5	6	4	1	6	0.910471	0.338303	0.999974		NimC4	LINK	The gene Nimrod C4 is referred to in FlyBase by the symbol Dmel\NimC4 (CG16876, FBgn0260011). It is a protein_coding_gene from Dmel. It has one annotated transcript and one polypeptide. Gene sequence location is 2L:14047582..14048863. Its molecular function is described by: phosphatidylserine binding. It is involved in the biological process described with: engulfment of apoptotic cell; phagocyto…
FBgn0085404	6	5	4	5	5.007	2	0.909248	0.308221	0.999974		CG34375	LINK	This gene is referred to in FlyBase by the symbol Dmel\CG34375 (FBgn0085404). It is a protein_coding_gene from Dmel. It has 3 annotated transcripts and 3 polypeptides (2 unique). Gene sequence location is 3R:23000139..23010562. Its molecular function is described by: zinc ion binding; ubiquitin protein ligase activity. It is involved in the biological process described with: . 6 alleles are repor…
FBgn0040765	46.24	86.906	38.66	41.346	43.001	42.027	0.9073	0.00540166	0.608198		luna	LINK	The gene luna is referred to in FlyBase by the symbol Dmel\luna (CG33473, FBgn0040765). It is a protein_coding_gene from Dmel. It has 3 annotated transcripts and 3 polypeptides (1 unique). Gene sequence location is 2R:10977956..11116378. Its molecular function is described by: RNA polymerase II cis-regulatory region sequence-specific DNA binding; sequence-specific DNA binding; DNA-binding transcr…
FBgn0039454	2	2.1	1	2	1	1	0.905884	0.544507	0.999974		CG14247	LINK	This gene is referred to in FlyBase by the symbol Dmel\CG14247 (FBgn0039454). It is a protein_coding_gene from Dmel. It has one annotated transcript and one polypeptide. Gene sequence location is 3R:26737610..26738593. Its molecular function is described by: chitin binding. It is involved in the biological process described with: chitin metabolic process. 4 alleles are reported. No phenotypic dat…
FBgn0038851	8	3	2	4	2	5	0.905681	0.352167	0.999974		dmrt93B	LINK	The gene doublesex-Mab related 93B is referred to in FlyBase by the symbol Dmel\dmrt93B (CG5737, FBgn0038851). It is a protein_coding_gene from Dmel. It has one annotated transcript and one polypeptide. Gene sequence location is 3R:21074007..21076798. Its molecular function is described by: RNA polymerase II transcription regulatory region sequence-specific DNA binding; DNA-binding transcription …
FBgn0031517	238	457.419	198.056	221	231.793	207.625	0.902775	9.25321e-05	0.0366056	UP	CG15406	LINK	This gene is referred to in FlyBase by the symbol Dmel\CG15406 (FBgn0031517). It is a protein_coding_gene from Dmel. It has one annotated transcript and one polypeptide. Gene sequence location is 2L:3309222..3311682. Its molecular function is described by: carbohydrate:proton symporter activity. It is involved in the biological process described with: glucose import. 4 alleles are reported. The p…
FBgn0262987	1	2	1	1	1	1.091	0.90061	0.593615			CG43295	LINK	This gene is referred to in FlyBase by the symbol Dmel\CG43295 (FBgn0262987). It is a protein_coding_gene from Dmel. It has one annotated transcript and one polypeptide. Gene sequence location is 3L:16105852..16106428. Its molecular function is unknown. The biological processes in which it is involved are not known. No alleles are reported.
FBgn0051755	1	5.005	3	5.022	1.002	1.005	0.898925	0.460028	0.999974		SoYb	LINK	The gene Sister of Yb is referred to in FlyBase by the symbol Dmel\SoYb (CG31755, FBgn0051755). It is a protein_coding_gene from Dmel. It has 2 annotated transcripts and 2 polypeptides (1 unique). Gene sequence location is 2L:9996706..10002736. Its molecular function is unknown. It is involved in the biological process described with: germ-line stem cell division; negative regulation of transposi…
FBgn0000964	0	13	5	3	3	6	0.896723	0.36	0.999974		tj	LINK	The gene traffic jam is referred to in FlyBase by the symbol Dmel\tj (CG10034, FBgn0000964). It is a protein_coding_gene from Dmel. It has 2 annotated transcripts and 2 polypeptides (all unique). Gene sequence location is 2L:19464267..19467758. Its molecular function is described by: DNA-binding transcription factor activity; RNA polymerase II cis-regulatory region sequence-specific DNA binding; …
FBgn0038262	13.484	19.652	8	13.738	8.759	10.987	0.895699	0.117498	0.999974		CG14857	LINK	This gene is referred to in FlyBase by the symbol Dmel\CG14857 (FBgn0038262). It is a protein_coding_gene from Dmel. It has one annotated transcript and one polypeptide. Gene sequence location is 3R:14801773..14804342. Its molecular function is unknown. It is involved in the biological process described with: transmembrane transport. 6 alleles are reported. No phenotypic data is available. No phe…
FBgn0260429	15	65.743	9	12	29.001	17.013	0.895084	0.103898	0.999974		CG42524	LINK	This gene is referred to in FlyBase by the symbol Dmel\CG42524 (FBgn0260429). It is a protein_coding_gene from Dmel. It has 3 annotated transcripts and 3 polypeptides (1 unique). Gene sequence location is 2R:15613854..15657214. Its molecular function is unknown. The biological processes in which it is involved are not known. 7 alleles are reported. No phenotypic data is available. No phenotypic c…
FBgn0040343	7	21.229	13	19	5	8	0.894945	0.135145	0.999974		CG3713	LINK	This gene is referred to in FlyBase by the symbol Dmel\CG3713 (FBgn0040343). It is a protein_coding_gene from Dmel. It has 2 annotated transcripts and 2 polypeptides (1 unique). Gene sequence location is X:846171..847157. Its molecular function is unknown. The biological processes in which it is involved are not known. 2 alleles are reported. No phenotypic data is available. The phenotypic class …
FBgn0030970	17.512	25.382	19.183	20.282	14.825	14.473	0.893742	0.0539647	0.999974		CG7326	LINK	This gene is referred to in FlyBase by the symbol Dmel\CG7326 (FBgn0030970). It is a protein_coding_gene from Dmel. It has 2 annotated transcripts and 2 polypeptides (1 unique). Gene sequence location is X:18861197..18863776. Its molecular function is described by: ubiquitin protein ligase activity. The biological processes in which it is involved are not known. 7 alleles are reported. No phenoty…
FBgn0002564	2	3	4	1	0	6	0.893623	0.469725	0.999974		Lsp1gamma	LINK	The gene Larval serum protein 1 gamma is referred to in FlyBase by the symbol Dmel\Lsp1gamma (CG6821, FBgn0002564). It is a protein_coding_gene from Dmel. It has one annotated transcript and one polypeptide. Gene sequence location is 3L:66430..68995. Its molecular function is unknown. The biological processes in which it is involved are not known. 11 alleles are reported. The phenotype of these a…
FBgn0034296	215.056	407.195	177	167	198	223.85	0.893505	0.000433855	0.113778		CG10912	LINK	This gene is referred to in FlyBase by the symbol Dmel\CG10912 (FBgn0034296). It is a protein_coding_gene from Dmel. It has one annotated transcript and one polypeptide. Gene sequence location is 2R:18056064..18057065. Its molecular function is unknown. It is involved in the biological process described with: cold acclimation. 3 alleles are reported. No phenotypic data is available. The phenotypi…
FBgn0003268	9	5	10	6	4	10.019	0.892337	0.225566	0.999974		rod	LINK	The gene rough deal is referred to in FlyBase by the symbol Dmel\rod (CG1569, FBgn0003268). It is a protein_coding_gene from Dmel. It has one annotated transcript and one polypeptide. Gene sequence location is 3R:31580951..31588244. Its molecular function is described by: protein binding; Rab GTPase binding. It is involved in the biological process described with 6 unique terms, many of which gro…
FBgn0040363	4	4.154	4	6	3	1	0.889808	0.373381	0.999974		CG11384	LINK	This gene is referred to in FlyBase by the symbol Dmel\CG11384 (FBgn0040363). It is a protein_coding_gene from Dmel. It has one annotated transcript and one polypeptide. Gene sequence location is X:1173877..1176035. Its molecular function is unknown. The biological processes in which it is involved are not known. 2 alleles are reported. No phenotypic data is available. No phenotypic class data is…
FBgn0034966	4	4.025	1	2	2	3.004	0.888202	0.440253	0.999974		CG13563	LINK	This gene is referred to in FlyBase by the symbol Dmel\CG13563 (FBgn0034966). It is a protein_coding_gene from Dmel. It has one annotated transcript and one polypeptide. Gene sequence location is 2R:24055306..24057599. Its molecular function is unknown. The biological processes in which it is involved are not known. 5 alleles are reported. No phenotypic data is available. The phenotypic classes o…
FBgn0260867	6	10.635	6.112	12.929	2.17	4.997	0.88748	0.255694	0.999974		CG42577	LINK	This gene is referred to in FlyBase by the symbol Dmel\CG42577 (FBgn0260867). It is a protein_coding_gene from Dmel. It has one annotated transcript and one polypeptide. Gene sequence location is X:20259239..20259656. Its molecular function is described by: . It is involved in the biological process described with: . No alleles are reported. Summary of modENCODE Temporal Expression Profile: Tempo…
FBgn0050414	3	7	3	5	2	3.999	0.886871	0.363171	0.999974		CG30414	LINK	This gene is referred to in FlyBase by the symbol Dmel\CG30414 (FBgn0050414). It is a protein_coding_gene from Dmel. It has 2 annotated transcripts and 2 polypeptides (1 unique). Gene sequence location is 2R:23384200..23385468. Its molecular function is described by: serine-type endopeptidase activity. It is involved in the biological process described with: proteolysis. 6 alleles are reported. N…
FBgn0031038	22.775	37.515	17.334	13.416	16.526	28.688	0.883969	0.0582671	0.999974		Tyler	LINK	The gene Tyler is referred to in FlyBase by the symbol Dmel\Tyler (CG14208, FBgn0031038). It is a protein_coding_gene from Dmel. It has 3 annotated transcripts and 3 polypeptides (all unique). Gene sequence location is X:19611526..19615617. Its molecular function is unknown. The biological processes in which it is involved are not known. 2 alleles are reported. No phenotypic data is available. No…
FBgn0000278	0	0	6	1	3	1	0.883349	0.564477	0.999974		CecB	LINK	The gene Cecropin B is referred to in FlyBase by the symbol Dmel\CecB (CG1878, FBgn0000278). It is a protein_coding_gene from Dmel. It has one annotated transcript and one polypeptide. Gene sequence location is 3R:30213315..30213797. Its molecular function is unknown. It is involved in the biological process described with: humoral immune response; defense response to Gram-negative bacterium; def…
FBgn0036596	0	5	2	3	2	0	0.881765	0.554807	0.999974		CG13045	LINK	This gene is referred to in FlyBase by the symbol Dmel\CG13045 (FBgn0036596). It is a protein_coding_gene from Dmel. It has one annotated transcript and one polypeptide. Gene sequence location is 3L:16289712..16290950. Its molecular function is unknown. The biological processes in which it is involved are not known. 2 alleles are reported. No phenotypic data is available. No phenotypic class data…
FBgn0040637	12	19.006	33	10	4	37.004	0.88057	0.163204	0.999974		CG11458	LINK	This gene is referred to in FlyBase by the symbol Dmel\CG11458 (FBgn0040637). It is a protein_coding_gene from Dmel. It has one annotated transcript and one polypeptide. Gene sequence location is 3L:20905795..20906331. Its molecular function is unknown. The biological processes in which it is involved are not known. One allele is reported. No phenotypic data is available. The phenotypic class of …
FBgn0040843	14	24.779	15	13	9.117	19	0.879002	0.0856776	0.999974		CG15213	LINK	This gene is referred to in FlyBase by the symbol Dmel\CG15213 (FBgn0040843). It is a protein_coding_gene from Dmel. It has one annotated transcript and one polypeptide. Gene sequence location is 3L:5132796..5133220. Its molecular function is unknown. The biological processes in which it is involved are not known. 4 alleles are reported. No phenotypic data is available. The phenotypic class of al…
FBgn0033850	0	2	1	0	1	1.009	0.876878	0.680503			CG13331	LINK	This gene is referred to in FlyBase by the symbol Dmel\CG13331 (FBgn0033850). It is a protein_coding_gene from Dmel. It has one annotated transcript and one polypeptide. Gene sequence location is 2R:13521769..13523375. Its molecular function is unknown. The biological processes in which it is involved are not known. 2 alleles are reported. No phenotypic data is available. The phenotypic class of …
FBgn0259171	99.033	272.116	89.203	101.095	113.169	117.491	0.874589	0.00236205	0.355673		Pde9	LINK	The gene Phosphodiesterase 9 is referred to in FlyBase by the symbol Dmel\Pde9 (CG42276, FBgn0259171). It is a protein_coding_gene from Dmel. It has 4 annotated transcripts and 4 polypeptides (2 unique). Gene sequence location is X:12785563..12897327. Its molecular function is described by: 3',5'-cyclic-GMP phosphodiesterase activity; 3',5'-cyclic-nucleotide phosphodiesterase activity. It is invo…
FBgn0265184	3.017	1.004	3.015	2.043	2.028	2.038	0.874127	0.481772	0.999974		CG44249	LINK	This gene is referred to in FlyBase by the symbol Dmel\CG44249 (FBgn0265184). It is a protein_coding_gene from Dmel. It has one annotated transcript and one polypeptide. Gene sequence location is 2R:22066883..22068372. Its molecular function is described by: 3'-5'-exoribonuclease activity; mRNA binding; nucleic acid binding. It is involved in the biological process described with: exonucleolytic …
FBgn0033110	3	7.032	0	1	1.001	5	0.872768	0.487172	0.999974		CG9447	LINK	This gene is referred to in FlyBase by the symbol Dmel\CG9447 (FBgn0033110). It is a protein_coding_gene from Dmel. It has one annotated transcript and one polypeptide. Gene sequence location is 2R:6872996..6875819. Its molecular function is described by: transferase activity, transferring acyl groups other than amino-acyl groups. The biological processes in which it is involved are not known. On…
FBgn0085386	8.027	24.049	14	8.025	12.016	14.059	0.871619	0.120187	0.999974		CG34357	LINK	This gene is referred to in FlyBase by the symbol Dmel\CG34357 (FBgn0085386). It is a protein_coding_gene from Dmel. It has 4 annotated transcripts and 4 polypeptides (3 unique). Gene sequence location is 3R:4491943..4558067. Its molecular function is described by: peptide receptor activity; signaling receptor activity; ATP binding; guanylate cyclase activity. It is involved in the biological pro…
FBgn0001134	5.019	8.287	11.191	11.138	5.185	4.151	0.868232	0.233398	0.999974		Grd	LINK	The gene Glycine receptor is referred to in FlyBase by the symbol Dmel\Grd (CG7446, FBgn0001134). It is a protein_coding_gene from Dmel. It has one annotated transcript and one polypeptide. Gene sequence location is 3L:17823333..17839767. Its molecular function is described by 8 unique terms, many of which group under: inorganic molecular entity transmembrane transporter activity; signaling recep…
FBgn0038838	1	2	2	2	2	0	0.86789	0.574342	0.999974		TotB	LINK	The gene Turandot B is referred to in FlyBase by the symbol Dmel\TotB (CG5609, FBgn0038838). It is a protein_coding_gene from Dmel. It has one annotated transcript and one polypeptide. Gene sequence location is 3R:20873938..20874522. Its molecular function is unknown. It is involved in the biological process described with: response to UV; cellular response to heat; response to heat; response to …
FBgn0086782	6	18.114	4	4.001	4.587	12.409	0.86714	0.249589	0.999974		amn	LINK	The gene amnesiac is referred to in FlyBase by the symbol Dmel\amn (CG11937, FBgn0086782).The gene has a gene model, but the supporting evidence is inconclusive. It is a protein_coding_gene from Dmel. It has one annotated transcript and one polypeptide. Gene sequence location is X:19886108..19890060. Its molecular function is described by: neuropeptide hormone activity. It is involved in the biol…
FBgn0085465	2	1	3.989	1	2	2.118	0.862092	0.521723	0.999974		CG34436	LINK	This gene is referred to in FlyBase by the symbol Dmel\CG34436 (FBgn0085465). It is a protein_coding_gene from Dmel. It has one annotated transcript and one polypeptide. Gene sequence location is 3R:28282580..28283548. Its molecular function is unknown. It is involved in the biological process described with: proteolysis. 3 alleles are reported. No phenotypic data is available. The phenotypic cla…
FBgn0039086	6.057	8.144	7.105	7.038	6.008	4.001	0.859762	0.25238	0.999974		Ugt303B1	LINK	The gene UDP-glycosyltransferase family 303 member B1 is referred to in FlyBase by the symbol Dmel\Ugt303B1 (CG16732, FBgn0039086). It is a protein_coding_gene from Dmel. It has 2 annotated transcripts and 2 polypeptides (all unique). Gene sequence location is 3R:23534900..23536710. Its molecular function is described by: transferase activity, transferring hexosyl groups. The biological processes…
FBgn0000279	3	8	11	4	10	3	0.859139	0.285193	0.999974		CecC	LINK	The gene Cecropin C is referred to in FlyBase by the symbol Dmel\CecC (CG1373, FBgn0000279). It is a protein_coding_gene from Dmel. It has one annotated transcript and one polypeptide. Gene sequence location is 3R:30216484..30216938. Its molecular function is unknown. It is involved in the biological process described with: defense response to Gram-positive bacterium; antibacterial humoral respon…
FBgn0030054	12	23.32	14.034	18.003	10	11	0.858439	0.0950988	0.999974		Caf1-180	LINK	The gene Chromatin assembly factor 1, p180 subunit is referred to in FlyBase by the symbol Dmel\Caf1-180 (CG12109, FBgn0030054). It is a protein_coding_gene from Dmel. It has one annotated transcript and one polypeptide. Gene sequence location is X:8602137..8606304. Its molecular function is described by: histone binding. It is involved in the biological process described with 7 unique terms, man…
FBgn0001229	13	14	6	12.02	6.025	9	0.857862	0.171145	0.999974		Hsp67Bc	LINK	The gene Heat shock gene 67Bc is referred to in FlyBase by the symbol Dmel\Hsp67Bc (CG4190, FBgn0001229). It is a protein_coding_gene from Dmel. It has one annotated transcript and one polypeptide. Gene sequence location is 3L:9371511..9372497. Its molecular function is described by: protein binding; unfolded protein binding. It is involved in the biological process described with: positive regul…
FBgn0261019	16.987	19.875	18.478	17.068	26.598	0	0.856502	0.51684	0.999974		moi	LINK	The gene modigliani is referred to in FlyBase by the symbol Dmel\moi (CG42350, FBgn0261019). It is a protein_coding_gene from Dmel. It has one annotated transcript and one polypeptide. Gene sequence location is 3R:18255530..18257677. Its molecular function is described by: protein binding; single-stranded telomeric DNA binding. It is involved in the biological process described with: telomere cap…
FBgn0287592	1.481	3.056	1.399	3.938	1.537	0	0.852365	0.596675			CG46462	LINK	This gene is referred to in FlyBase by the symbol Dmel\CG46462 (FBgn0287592). It is a protein_coding_gene from Dmel. It has one annotated transcript and one polypeptide. Gene sequence location is 3L:19931691..19932331. Its molecular function is unknown. The biological processes in which it is involved are not known. No alleles are reported.
FBgn0031855	11	35	29	17	28	12.026	0.852208	0.0808782	0.999974		meng	LINK	The gene meng-po is referred to in FlyBase by the symbol Dmel\meng (CG11221, FBgn0031855). It is a protein_coding_gene from Dmel. It has 2 annotated transcripts and 2 polypeptides (1 unique). Gene sequence location is 2L:6742502..6756133. Its molecular function is described by: ATP binding; protein serine/threonine kinase activity. It is involved in the biological process described with 6 unique …
FBgn0011761	4	4	5	5	2	4	0.848385	0.365646	0.999974		dhd	LINK	The gene deadhead is referred to in FlyBase by the symbol Dmel\dhd (CG4193, FBgn0011761). It is a protein_coding_gene from Dmel. It has 2 annotated transcripts and 2 polypeptides (1 unique). Gene sequence location is X:5312171..5313125. Its molecular function is described by: disulfide oxidoreductase activity; protein disulfide oxidoreductase activity. It is involved in the biological process des…
FBgn0033458	5	7.17	1	3	5.086	2.039	0.844254	0.400045	0.999974		Lime	LINK	The gene Linking immunity and metabolism is referred to in FlyBase by the symbol Dmel\Lime (CG18446, FBgn0033458). It is a protein_coding_gene from Dmel. It has one annotated transcript and one polypeptide. Gene sequence location is 2R:9871470..9873646. Its molecular function is described by: sequence-specific DNA binding; DNA-binding transcription factor activity, RNA polymerase II-specific. It …
FBgn0039172	1301.6	937.064	1526.53	1723.87	790.255	914.127	0.843715	0.0045103	0.547279		Spase22-23	LINK	The gene Spase 22/23-subunit is referred to in FlyBase by the symbol Dmel\Spase22-23 (CG5677, FBgn0039172). It is a protein_coding_gene from Dmel. It has 2 annotated transcripts and 2 polypeptides (1 unique). Gene sequence location is 3R:24228342..24230035. Its molecular function is described by: peptidase activity. It is involved in the biological process described with: protein targeting to ER;…
FBgn0036985	8	2	3	0	5	6.064	0.842884	0.421453	0.999974		zye	LINK	The gene zye is referred to in FlyBase by the symbol Dmel\zye (CG5847, FBgn0036985). It is a protein_coding_gene from Dmel. It has one annotated transcript and one polypeptide. Gene sequence location is 3L:20413604..20424309. Its molecular function is described by: structural constituent of chitin-based cuticle. It is involved in the biological process described with: apical constriction; regulat…
FBgn0259192	2	0	0	1	0	1	0.841195	0.717334			CG42296	LINK	This gene is referred to in FlyBase by the symbol Dmel\CG42296 (FBgn0259192). It is a protein_coding_gene from Dmel. It has one annotated transcript and one polypeptide. Gene sequence location is 2L:2032519..2036041. Its molecular function is described by: chitin binding. It is involved in the biological process described with: chitin metabolic process. 3 alleles are reported. The phenotype of th…
FBgn0264546	0	3.668	1	2	0	1	0.840968	0.658959			CG43925	LINK	This gene is referred to in FlyBase by the symbol Dmel\CG43925 (FBgn0264546). It is a protein_coding_gene from Dmel. It has one annotated transcript and one polypeptide. Gene sequence location is 2L:13176423..13176888. Its molecular function is described by: . It is involved in the biological process described with: . No alleles are reported.
FBgn0050272	18	35	8	12	14	20.007	0.840253	0.108142	0.999974		MFS1	LINK	The gene Major Facilitator Superfamily Transporter 1 is referred to in FlyBase by the symbol Dmel\MFS1 (CG30272, FBgn0050272). It is a protein_coding_gene from Dmel. It has one annotated transcript and one polypeptide. Gene sequence location is 2R:22829644..22831877. Its molecular function is described by: transmembrane transporter activity. It is involved in the biological process described with…
FBgn0035258	2	2	1	1	2	1	0.839962	0.571721	0.999974		CG13931	LINK	This gene is referred to in FlyBase by the symbol Dmel\CG13931 (FBgn0035258). It is a protein_coding_gene from Dmel. It has 2 annotated transcripts and 2 polypeptides (1 unique). Gene sequence location is 3L:1700956..1702407. Its molecular function is unknown. The biological processes in which it is involved are not known. 3 alleles are reported. No phenotypic data is available. The phenotypic cl…
FBgn0038731	6.421	0	2.859	4.976	0	4.288	0.838997	0.515373	0.999974		CG11659	LINK	This gene is referred to in FlyBase by the symbol Dmel\CG11659 (FBgn0038731). It is a protein_coding_gene from Dmel. It has one annotated transcript and one polypeptide. Gene sequence location is 3R:19775459..19777280. Its molecular function is described by: fatty acid ligase activity; CoA-ligase activity; long-chain fatty acid-CoA ligase activity. It is involved in the biological process describ…
FBgn0050082	1	6	2	5	2	0	0.837651	0.510608	0.999974		CG30082	LINK	This gene is referred to in FlyBase by the symbol Dmel\CG30082 (FBgn0050082). It is a protein_coding_gene from Dmel. It has one annotated transcript and one polypeptide. Gene sequence location is 2R:15685004..15686082. Its molecular function is described by: serine-type endopeptidase activity. It is involved in the biological process described with: proteolysis. One allele is reported. No phenoty…
FBgn0086673	6	12	6	7	4	8	0.835435	0.246011	0.999974		CG13272	LINK	This gene is referred to in FlyBase by the symbol Dmel\CG13272 (FBgn0086673). It is a protein_coding_gene from Dmel. It has 2 annotated transcripts and 2 polypeptides (1 unique). Gene sequence location is 2L:16804884..16816069. Its molecular function is described by: . It is involved in the biological process described with: . 3 alleles are reported. No phenotypic data is available. The phenotypi…
FBgn0037627	2	16	8	10.003	1	9.55	0.834354	0.297758	0.999974		CG13318	LINK	This gene is referred to in FlyBase by the symbol Dmel\CG13318 (FBgn0037627). It is a protein_coding_gene from Dmel. It has one annotated transcript and one polypeptide. Gene sequence location is 3R:8771246..8772691. Its molecular function is unknown. It is involved in the biological process described with: proteolysis. 9 alleles are reported. No phenotypic data is available. The phenotypic class…
FBgn0036600	0	3	0	1	0	1	0.832089	0.726757			CG13043	LINK	This gene is referred to in FlyBase by the symbol Dmel\CG13043 (FBgn0036600). It is a protein_coding_gene from Dmel. It has one annotated transcript and one polypeptide. Gene sequence location is 3L:16305225..16305870. Its molecular function is unknown. The biological processes in which it is involved are not known. 4 alleles are reported. No phenotypic data is available. The phenotypic classes o…
FBgn0029799	25.872	43.687	17.757	38.675	10.929	22.825	0.831134	0.0642007	0.999974		CG15772	LINK	This gene is referred to in FlyBase by the symbol Dmel\CG15772 (FBgn0029799). It is a protein_coding_gene from Dmel. It has 2 annotated transcripts and 2 polypeptides (1 unique). Gene sequence location is X:5752249..5754041. Its molecular function is described by: structural molecule activity. The biological processes in which it is involved are not known. 3 alleles are reported. The phenotype of…
FBgn0033353	6	18.947	11	7	4	16.911	0.830393	0.206371	0.999974		CG13749	LINK	This gene is referred to in FlyBase by the symbol Dmel\CG13749 (FBgn0033353). It is a protein_coding_gene from Dmel. It has one annotated transcript and one polypeptide. Gene sequence location is 2R:8933423..8934445. Its molecular function is unknown. The biological processes in which it is involved are not known. 3 alleles are reported. No phenotypic data is available. The phenotypic classes of …
FBgn0031455	12.987	17.697	16.331	14.675	13.964	10.997	0.829921	0.117372	0.999974		Snapin	LINK	The gene SNAP associated protein is referred to in FlyBase by the symbol Dmel\Snapin (CG9958, FBgn0031455). It is a protein_coding_gene from Dmel. It has one annotated transcript and one polypeptide. Gene sequence location is 2L:2758427..2759677. Its molecular function is described by: protein binding; SNARE binding. It is involved in the biological process described with 10 unique terms, many of…
FBgn0039945	2.312	97.959	0	0	49.398	2.497	0.828932				CG17159	LINK	This gene is referred to in FlyBase by the symbol Dmel\CG17159 (FBgn0039945). It is a protein_coding_gene from Dmel. It has 2 annotated transcripts and 2 polypeptides (1 unique). Gene sequence location is X:23084960..23092631. Its molecular function is described by: . It is involved in the biological process described with: . 4 alleles are reported. No phenotypic data is available. No phenotypic …
FBgn0031832	55.433	17.494	56.175	54.519	39.585	27.568	0.828045	0.0796462	0.999974		CG9596	LINK	This gene is referred to in FlyBase by the symbol Dmel\CG9596 (FBgn0031832). It is a protein_coding_gene from Dmel. It has 3 annotated transcripts and 3 polypeptides (1 unique). Gene sequence location is 2L:6559426..6562289. Its molecular function is described by: tRNA (adenine-N1-)-methyltransferase activity. It is involved in the biological process described with: tRNA methylation. 4 alleles ar…
FBgn0034692	1	5	1.008	1	2	2.008	0.825274	0.546531	0.999974		CG13502	LINK	This gene is referred to in FlyBase by the symbol Dmel\CG13502 (FBgn0034692). It is a protein_coding_gene from Dmel. It has 2 annotated transcripts and 2 polypeptides (all unique). Gene sequence location is 2R:22085782..22088727. Its molecular function is described by: . It is involved in the biological process described with: . 5 alleles are reported. No phenotypic data is available. The phenoty…
FBgn0033446	3127.76	5772.85	4289.35	5212.89	2906.88	2863.28	0.822432	1.52404e-05	0.00907024	UP	CG1648	LINK	This gene is referred to in FlyBase by the symbol Dmel\CG1648 (FBgn0033446). It is a protein_coding_gene from Dmel. It has 3 annotated transcripts and 3 polypeptides (2 unique). Gene sequence location is 2R:9810974..9820053. Its molecular function is unknown. The biological processes in which it is involved are not known. 6 alleles are reported. The phenotypes of these alleles manifest in: mesoth…
FBgn0052391	8.314	3.397	13	18.638	0	6.921	0.820429	0.344117	0.999974		CG32391	LINK	This gene is referred to in FlyBase by the symbol Dmel\CG32391 (FBgn0052391). It is a protein_coding_gene from Dmel. It has one annotated transcript and one polypeptide. Gene sequence location is 3L:7068211..7069199. Its molecular function is described by: . It is involved in the biological process described with: . 3 alleles are reported. No phenotypic data is available. No phenotypic class data…
FBgn0035234	0	3.446	1	2.04	1.051	0	0.819104	0.666319			CG12003	LINK	This gene is referred to in FlyBase by the symbol Dmel\CG12003 (FBgn0035234). It is a protein_coding_gene from Dmel. It has one annotated transcript and one polypeptide. Gene sequence location is 3L:1565392..1567802. Its molecular function is described by: . It is involved in the biological process described with: . 3 alleles are reported. No phenotypic data is available. The phenotypic class of …
FBgn0259789	15	53.32	25	24	27	20	0.816954	0.052496	0.999974		zld	LINK	The gene zelda is referred to in FlyBase by the symbol Dmel\zld (CG12701, FBgn0259789). It is a protein_coding_gene from Dmel. It has 5 annotated transcripts and 5 polypeptides (3 unique). Gene sequence location is X:19766465..19783548. Its molecular function is described by: protein binding; RNA polymerase II cis-regulatory region sequence-specific DNA binding; sequence-specific DNA binding; DNA…
FBgn0030544	1	2	2	1	2	1	0.815351	0.584587	0.999974		CG13403	LINK	This gene is referred to in FlyBase by the symbol Dmel\CG13403 (FBgn0030544). It is a protein_coding_gene from Dmel. It has 2 annotated transcripts and 2 polypeptides (all unique). Gene sequence location is X:14191220..14192018. Its molecular function is described by: . The biological processes in which it is involved are not known. 2 alleles are reported. No phenotypic data is available. The phe…
FBgn0034391	5	3	0	3	1	3	0.815284	0.514409	0.999974		CG15080	LINK	This gene is referred to in FlyBase by the symbol Dmel\CG15080 (FBgn0034391). It is a protein_coding_gene from Dmel. It has one annotated transcript and one polypeptide. Gene sequence location is 2R:18783299..18794594. Its molecular function is described by: cell adhesion molecule binding. It is involved in the biological process described with: extracellular matrix organization; cell adhesion. 4…
FBgn0034429	9.96	26	5	15	8	8	0.813199	0.186804	0.999974		AANATL4	LINK	The gene Arylalkylamine N-acetyltransferase-like 4 is referred to in FlyBase by the symbol Dmel\AANATL4 (CG18607, FBgn0034429). It is a protein_coding_gene from Dmel. It has one annotated transcript and one polypeptide. Gene sequence location is 2R:19289109..19289852. Its molecular function is described by: N-acetyltransferase activity. The biological processes in which it is involved are not kno…
FBgn0032803	13	21	18	15	8	20	0.81269	0.11448	0.999974		CG13082	LINK	This gene is referred to in FlyBase by the symbol Dmel\CG13082 (FBgn0032803). It is a protein_coding_gene from Dmel. It has one annotated transcript and one polypeptide. Gene sequence location is 2L:19538425..19539740. Its molecular function is described by: . It is involved in the biological process described with: . 4 alleles are reported. The phenotype of these alleles manifest in: trichogen c…
FBgn0038980	17.083	45.812	24.144	22.244	29.335	16.473	0.81117	0.0593258	0.999974		Octbeta1R	LINK	The gene Octopamine beta1 receptor is referred to in FlyBase by the symbol Dmel\Octbeta1R (CG6919, FBgn0038980). It is a protein_coding_gene from Dmel. It has 4 annotated transcripts and 4 polypeptides (3 unique). Gene sequence location is 3R:22497215..22520078. Its molecular function is described by: G protein-coupled amine receptor activity; octopamine receptor activity; adrenergic receptor act…
FBgn0038549	6	17.627	16.01	13.061	5.544	14	0.811164	0.177272	0.999974		Nnk	LINK	This gene is referred to in FlyBase by the symbol Dmel\CG17802 (FBgn0038549). It is a protein_coding_gene from Dmel. It has one annotated transcript and one polypeptide. Gene sequence location is 3R:17803225..17805249. Its molecular function is described by: DNA-binding transcription factor activity; RNA polymerase II cis-regulatory region sequence-specific DNA binding; zinc ion binding; transcri…
FBgn0036330	1	2	1	0	2	1	0.810257	0.639011			CG11263	LINK	This gene is referred to in FlyBase by the symbol Dmel\CG11263 (FBgn0036330). It is a protein_coding_gene from Dmel. It has 2 annotated transcripts and 2 polypeptides (1 unique). Gene sequence location is 3L:13006817..13007881. Its molecular function is described by: protein homodimerization activity; RNA binding. The biological processes in which it is involved are not known. 3 alleles are repor…
FBgn0038847	1	2.041	1	0	2.015	1.039	0.810257	0.639011			CG12278	LINK	This gene is referred to in FlyBase by the symbol Dmel\CG12278 (FBgn0038847). It is a protein_coding_gene from Dmel. It has one annotated transcript and one polypeptide. Gene sequence location is 3R:21044068..21044905. Its molecular function is described by: . It is involved in the biological process described with: . 3 alleles are reported. No phenotypic data is available. The phenotypic classes…
FBgn0052255	1	2	1.019	0	2.386	1	0.810257	0.639011			Gr64f	LINK	The gene Gustatory receptor 64f is referred to in FlyBase by the symbol Dmel\Gr64f (CG32255, FBgn0052255). It is a protein_coding_gene from Dmel. It has one annotated transcript and one polypeptide. Gene sequence location is 3L:4035799..4037575. Its molecular function is described by: taste receptor activity; sweet taste receptor activity. It is involved in the biological process described with: …
FBgn0262839	14	29	17	16	16.007	16	0.808852	0.0850399	0.999974		CG43203	LINK	This gene is referred to in FlyBase by the symbol Dmel\CG43203 (FBgn0262839). It is a protein_coding_gene from Dmel. It has one annotated transcript and one polypeptide. Gene sequence location is 3R:19354051..19354884. Its molecular function is described by: . It is involved in the biological process described with: . No alleles are reported.
FBgn0033668	17.01	14.192	12.046	14.133	12.313	11.086	0.806817	0.138384	0.999974		exp	LINK	The gene expansion is referred to in FlyBase by the symbol Dmel\exp (CG13188, FBgn0033668). It is a protein_coding_gene from Dmel. It has 2 annotated transcripts and 2 polypeptides (all unique). Gene sequence location is 2R:11939557..11967435. Its molecular function is unknown. It is involved in the biological process described with: regulation of transcription, DNA-templated; trachea morphogenes…
FBgn0015399	57	94.737	47	62.005	38.035	62.863	0.805975	0.00838207	0.852043		kek1	LINK	The gene kekkon 1 is referred to in FlyBase by the symbol Dmel\kek1 (CG12283, FBgn0015399). It is a protein_coding_gene from Dmel. It has 2 annotated transcripts and 2 polypeptides (1 unique). Gene sequence location is 2L:12817000..12822787. Its molecular function is described by: receptor inhibitor activity; epidermal growth factor receptor binding; receptor antagonist activity. It is involved i…
FBgn0053841	4.521	7.603	4.871	4.609	7.719	1.59	0.805326	0.384354	0.999974		His2A:CG33841	LINK	The gene His2A:CG33841 is referred to in FlyBase by the symbol Dmel\His2A:CG33841 (CG33841, FBgn0053841). It is a protein_coding_gene from Dmel. It has one annotated transcript and one polypeptide. Gene sequence location is 2L:21498468..21498960. Its molecular function is described by: protein heterodimerization activity; DNA binding. It is involved in the biological process described with: chrom…
FBgn0029906	20.937	40.592	24	26	25.518	17	0.803984	0.049975	0.999974		xit	LINK	The gene xiantuan is referred to in FlyBase by the symbol Dmel\xit (CG4542, FBgn0029906). It is a protein_coding_gene from Dmel. It has one annotated transcript and one polypeptide. Gene sequence location is X:6821016..6822840. Its molecular function is described by: dolichyl pyrophosphate Glc1Man9GlcNAc2 alpha-1,3-glucosyltransferase activity. It is involved in the biological process described w…
FBgn0083963	25	51	32	28	25	34	0.802282	0.0312752	0.999974		Nlg3	LINK	The gene Neuroligin 3 is referred to in FlyBase by the symbol Dmel\Nlg3 (CG34127, FBgn0083963). It is a protein_coding_gene from Dmel. It has 2 annotated transcripts and 2 polypeptides (1 unique). Gene sequence location is 3R:7570281..7639434. Its molecular function is described by: signaling receptor activity; neurexin family protein binding. It is involved in the biological process described wi…
FBgn0053513	10	33	10.001	16	11	14.999	0.801125	0.12886	0.999974		Nmdar2	LINK	The gene NMDA receptor 2 is referred to in FlyBase by the symbol Dmel\Nmdar2 (CG33513, FBgn0053513). It is a protein_coding_gene from Dmel. It has 7 annotated transcripts and 7 polypeptides (5 unique). Gene sequence location is X:1483625..1507809. Its molecular function is described by: ligand-gated ion channel activity; signaling receptor activity; NMDA glutamate receptor activity. It is involve…
FBgn0266433	4.778	2	1	1	2	3	0.800067	0.526793	0.999974		CG45063	LINK	This gene is referred to in FlyBase by the symbol Dmel\CG45063 (FBgn0266433). It is a protein_coding_gene from Dmel. It has one annotated transcript and one polypeptide. Gene sequence location is 2R:22476385..22477295. Its molecular function is unknown. The biological processes in which it is involved are not known. No alleles are reported.
FBgn0004862	2	6	3	5	2	2	0.799966	0.446777	0.999974		bap	LINK	The gene bagpipe is referred to in FlyBase by the symbol Dmel\bap (CG7902, FBgn0004862). It is a protein_coding_gene from Dmel. It has one annotated transcript and one polypeptide. Gene sequence location is 3R:21388880..21390449. Its molecular function is described by: DNA-binding transcription factor activity, RNA polymerase II-specific; sequence-specific DNA binding; DNA binding; RNA polymerase…
FBgn0034520	3.069	7.673	13.484	9.388	2.813	9.16	0.799682	0.306685	0.999974		lms	LINK	The gene lateral muscles scarcer is referred to in FlyBase by the symbol Dmel\lms (CG13424, FBgn0034520). It is a protein_coding_gene from Dmel. It has 2 annotated transcripts and 2 polypeptides (1 unique). Gene sequence location is 2R:20556877..20559953. Its molecular function is described by: DNA-binding transcription repressor activity, RNA polymerase II-specific; RNA polymerase II cis-regulat…
FBgn0284224	21.792	0	16.251	17.97	2.963	20.201	0.798817	0.630524	0.999974		CG46308	LINK	This gene is referred to in FlyBase by the symbol Dmel\CG46308 (FBgn0284224). It is a protein_coding_gene from Dmel. It has one annotated transcript and one polypeptide. Gene sequence location is 2L:13461774..13500427. Its molecular function is unknown. The biological processes in which it is involved are not known. One allele is reported. No phenotypic data is available. No phenotypic class data…
FBgn0040892	9	8.009	7	10	6	5	0.798419	0.254896	0.999974		CG14634	LINK	This gene is referred to in FlyBase by the symbol Dmel\CG14634 (FBgn0040892). It is a protein_coding_gene from Dmel. It has one annotated transcript and one polypeptide. Gene sequence location is X:862608..863200. Its molecular function is unknown. The biological processes in which it is involved are not known. 4 alleles are reported. No phenotypic data is available. The phenotypic classes of all…
FBgn0266178	2.608	5.105	9.444	0	12.678	0	0.798327	0.705192	0.999974		pre-mod(mdg4)-B	LINK	This gene is referred to in FlyBase by the symbol Dmel\pre-mod(mdg4)-B (CG44884, FBgn0266178). It is a protein_coding_gene from Dmel. It has 3 annotated transcripts and 3 polypeptides (1 unique). Gene sequence location is 3R:21354445..21359768. Its molecular function is described by: . It is involved in the biological process described with: . No alleles are reported.
FBgn0050074	1	3.145	1.132	2.16	1.283	1.591	0.797716	0.603157			Obp50d	LINK	The gene Odorant-binding protein 50d is referred to in FlyBase by the symbol Dmel\Obp50d (CG30074, FBgn0050074). It is a protein_coding_gene from Dmel. It has one annotated transcript and one polypeptide. Gene sequence location is 2R:14373108..14373808. Its molecular function is described by: odorant binding. It is involved in the biological process described with: sensory perception of chemical …
FBgn0039374	73.879	88.457	143.95	124.208	89.152	57.096	0.796359	0.0184897	0.999974		CG17770	LINK	This gene is referred to in FlyBase by the symbol Dmel\CG17770 (FBgn0039374). It is a protein_coding_gene from Dmel. It has one annotated transcript and one polypeptide. Gene sequence location is 3R:25811911..25813134. Its molecular function is described by: enzyme regulator activity; calcium ion binding. It is involved in the biological process described with: microtubule cytoskeleton organizati…
FBgn0039374	73.879	88.457	143.95	124.208	89.152	57.096	0.796359	0.0184897	0.999974		CG17770	LINK	This gene is referred to in FlyBase by the symbol Dmel\CG17770 (FBgn0039374). It is a protein_coding_gene from Dmel. It has one annotated transcript and one polypeptide. Gene sequence location is 3R:25811911..25813134. Its molecular function is described by: enzyme regulator activity; calcium ion binding. It is involved in the biological process described with: microtubule cytoskeleton organizati…
FBgn0029713	9	22.744	12	15.007	9.926	11.213	0.794963	0.145437	0.999974		CG11436	LINK	This gene is referred to in FlyBase by the symbol Dmel\CG11436 (FBgn0029713). It is a protein_coding_gene from Dmel. It has one annotated transcript and one polypeptide. Gene sequence location is X:4549883..4551878. Its molecular function is described by: . It is involved in the biological process described with: actin filament polymerization. 4 alleles are reported. No phenotypic data is availab…
FBgn0032331	1	5	4	3	3	2	0.792286	0.471681	0.999974		CG14913	LINK	This gene is referred to in FlyBase by the symbol Dmel\CG14913 (FBgn0032331). It is a protein_coding_gene from Dmel. It has one annotated transcript and one polypeptide. Gene sequence location is 2L:11016995..11018778. Its molecular function is described by: . It is involved in the biological process described with: multicellular organism reproduction. One allele is reported. No phenotypic data i…
FBgn0262366	5	14	6	8	5	7	0.791524	0.264773	0.999974		CG43064	LINK	This gene is referred to in FlyBase by the symbol Dmel\CG43064 (FBgn0262366). It is a protein_coding_gene from Dmel. It has 2 annotated transcripts and 2 polypeptides (1 unique). Gene sequence location is 3L:11834721..11836721. Its molecular function is described by: . It is involved in the biological process described with: . No alleles are reported.
FBgn0026058	8	8	7	3	9	7	0.789319	0.287961	0.999974		OdsH	LINK	The gene Ods-site homeobox is referred to in FlyBase by the symbol Dmel\OdsH (CG6352, FBgn0026058). It is a protein_coding_gene from Dmel. It has one annotated transcript and one polypeptide. Gene sequence location is X:17791010..17814011. Its molecular function is described by: sequence-specific DNA binding. It is involved in the biological process described with: regulation of transcription, DN…
FBgn0010425	477.008	867.461	822.983	357.693	763.194	613.601	0.787601	0.00999632	0.929817		epsilonTry	LINK	The gene epsilonTrypsin is referred to in FlyBase by the symbol Dmel\epsilonTry (CG18681, FBgn0010425). It is a protein_coding_gene from Dmel. It has one annotated transcript and one polypeptide. Gene sequence location is 2R:11345237..11346066. Its molecular function is described by: serine-type endopeptidase activity. It is involved in the biological process described with: proteolysis. 3 allele…
FBgn0005677	12	36	20	17	17	20	0.785129	0.087624	0.999974		dac	LINK	The gene dachshund is referred to in FlyBase by the symbol Dmel\dac (CG4952, FBgn0005677). It is a protein_coding_gene from Dmel. It has 6 annotated transcripts and 6 polypeptides (all unique). Gene sequence location is 2L:16466512..16485998. Its molecular function is described by: protein binding. It is involved in the biological process described with 15 unique terms, many of which group under:…
FBgn0037661	10	18	12	12	13	8	0.784932	0.161982	0.999974		Ada	LINK	The gene Adenosine deaminase is referred to in FlyBase by the symbol Dmel\Ada (CG11994, FBgn0037661). It is a protein_coding_gene from Dmel. It has one annotated transcript and one polypeptide. Gene sequence location is 3R:9065183..9066303. Its molecular function is described by: adenosine deaminase activity. It is involved in the biological process described with: inosine biosynthetic process; a…
FBgn0031955	9	9	7	11	6	5	0.783426	0.25564	0.999974		CG14535	LINK	This gene is referred to in FlyBase by the symbol Dmel\CG14535 (FBgn0031955). It is a protein_coding_gene from Dmel. It has 2 annotated transcripts and 2 polypeptides (1 unique). Gene sequence location is 2L:7844905..7855475. Its molecular function is described by: microtubule motor activity; ATP binding; microtubule binding. The biological processes in which it is involved are not known. 5 allel…
FBgn0003390	44.076	93.506	84.374	76	51.235	59.119	0.78169	0.00834533	0.852043		shf	LINK	The gene shifted is referred to in FlyBase by the symbol Dmel\shf (CG3135, FBgn0003390). It is a protein_coding_gene from Dmel. It has 4 annotated transcripts and 4 polypeptides (all unique). Gene sequence location is X:6771463..6779659. Its molecular function is described by: protein binding. It is involved in the biological process described with: smoothened signaling pathway; protein stabiliza…
FBgn0000028	22.999	47.1	29	34.024	27.624	20.84	0.781597	0.0414712	0.999974		acj6	LINK	The gene abnormal chemosensory jump 6 is referred to in FlyBase by the symbol Dmel\acj6 (CG9151, FBgn0000028). It is a protein_coding_gene from Dmel. It has 13 annotated transcripts and 13 polypeptides (all unique). Gene sequence location is X:15350239..15379064. Its molecular function is described by: sequence-specific DNA binding; DNA-binding transcription activator activity, RNA polymerase II-…
FBgn0003165	238.12	539.217	235.253	274	235.441	298.866	0.778311	0.000486125	0.123992		pum	LINK	The gene pumilio is referred to in FlyBase by the symbol Dmel\pum (CG9755, FBgn0003165). It is a protein_coding_gene from Dmel. It has 8 annotated transcripts and 8 polypeptides (5 unique). Gene sequence location is 3R:9066343..9237682. Its molecular function is described by 6 unique terms, many of which group under: heterocyclic compound binding; nucleic acid binding; mRNA binding; binding; orga…
FBgn0015519	33.143	67.022	26	31.179	31.583	39.333	0.778011	0.034017	0.999974		nAChRalpha3	LINK	The gene nicotinic Acetylcholine Receptor alpha3 is referred to in FlyBase by the symbol Dmel\nAChRalpha3 (CG2302, FBgn0015519). It is a protein_coding_gene from Dmel. It has 2 annotated transcripts and 2 polypeptides (1 unique). Gene sequence location is X:8276200..8367169. Its molecular function is described by: acetylcholine receptor activity; acetylcholine-gated cation-selective channel activ…
FBgn0263000	5.082	18.483	4	8.298	4.264	9.045	0.776076	0.286917	0.999974		CG43308	LINK	This gene is referred to in FlyBase by the symbol Dmel\CG43308 (FBgn0263000). It is a protein_coding_gene from Dmel. It has 2 annotated transcripts and 2 polypeptides (all unique). Gene sequence location is 2R:20562463..20563001. Its molecular function is described by: . It is involved in the biological process described with: . No alleles are reported.
FBgn0085440	1	13.96	1	6	2.396	3	0.774059	0.465238	0.999974		Lgr4	LINK	The gene Leucine-rich repeat-containing G protein-coupled receptor 4 is referred to in FlyBase by the symbol Dmel\Lgr4 (CG34411, FBgn0085440). It is a protein_coding_gene from Dmel. It has 2 annotated transcripts and 2 polypeptides (all unique). Gene sequence location is X:13161714..13189164. Its molecular function is described by: neuropeptide receptor activity; protein-hormone receptor activity…
FBgn0262876	20	19.553	20	21	17	14.69	0.773046	0.102088	0.999974		CG43231	LINK	This gene is referred to in FlyBase by the symbol Dmel\CG43231 (FBgn0262876). It is a protein_coding_gene from Dmel. It has one annotated transcript and one polypeptide. Gene sequence location is 2L:17704681..17706142. Its molecular function is described by: . It is involved in the biological process described with: . No alleles are reported.
FBgn0031550	3.532	2	1	0	2	3	0.772893	0.581226	0.999974		IFT57	LINK	The gene Intraflagellar transport 57 is referred to in FlyBase by the symbol Dmel\IFT57 (CG8853, FBgn0031550). It is a protein_coding_gene from Dmel. It has one annotated transcript and one polypeptide. Gene sequence location is 2L:3530789..3532678. Its molecular function is described by: . It is involved in the biological process described with 6 unique terms, many of which group under: plasma m…
FBgn0040730	4	15	10	6	9	8.001	0.772337	0.253581	0.999974		CG15127	LINK	This gene is referred to in FlyBase by the symbol Dmel\CG15127 (FBgn0040730). It is a protein_coding_gene from Dmel. It has one annotated transcript and one polypeptide. Gene sequence location is 2R:19680768..19681391. Its molecular function is described by: . It is involved in the biological process described with: . 2 alleles are reported. No phenotypic data is available. The phenotypic class o…
FBgn0032891	7.1	5.249	2	3	6.613	3.126	0.770642	0.406448	0.999974		Oseg5	LINK	The gene Outer segment 5 is referred to in FlyBase by the symbol Dmel\Oseg5 (CG9333, FBgn0032891). It is a protein_coding_gene from Dmel. It has one annotated transcript and one polypeptide. Gene sequence location is 2L:20832849..20835840. Its molecular function is described by: . It is involved in the biological process described with: non-motile cilium assembly; cilium assembly. 5 alleles are r…
FBgn0259202	60	107.685	72.5	13.422	66.937	107.007	0.770578	0.360852	0.999974		CG42306	LINK	This gene is referred to in FlyBase by the symbol Dmel\CG42306 (FBgn0259202). It is a protein_coding_gene from Dmel. It has 3 annotated transcripts and 3 polypeptides (1 unique). Gene sequence location is 2R:18658418..18661548. Its molecular function is unknown. The biological processes in which it is involved are not known. One allele is reported. No phenotypic data is available. No phenotypic c…
FBgn0036294	11.326	21.418	9.543	9.617	15.418	9.239	0.769214	0.181197	0.999974		CG10654	LINK	This gene is referred to in FlyBase by the symbol Dmel\CG10654 (FBgn0036294). It is a protein_coding_gene from Dmel. It has 2 annotated transcripts and 2 polypeptides (all unique). Gene sequence location is 3L:12505374..12507840. Its molecular function is described by 6 unique terms, many of which group under: heterocyclic compound binding; nucleic acid binding; sequence-specific DNA binding; mol…
FBgn0033645	2	9.846	1.182	3	3.326	3.58	0.769168	0.473426	0.999974		CG13196	LINK	This gene is referred to in FlyBase by the symbol Dmel\CG13196 (FBgn0033645). It is a protein_coding_gene from Dmel. It has one annotated transcript and one polypeptide. Gene sequence location is 2R:11684165..11686434. Its molecular function is unknown. It is involved in the biological process described with: cell morphogenesis. 5 alleles are reported. The phenotype of these alleles manifest in: …
FBgn0036725	9	25.001	11	11	9	16.002	0.769108	0.164986	0.999974		CG18265	LINK	This gene is referred to in FlyBase by the symbol Dmel\CG18265 (FBgn0036725). It is a protein_coding_gene from Dmel. It has 3 annotated transcripts and 3 polypeptides (1 unique). Gene sequence location is 3L:17439401..17457461. Its molecular function is described by: nucleic acid binding. It is involved in the biological process described with: . 9 alleles are reported. The phenotype of these all…
FBgn0036178	1	0	1	1	0	1	0.769095	0.731771			CG14137	LINK	This gene is referred to in FlyBase by the symbol Dmel\CG14137 (FBgn0036178). It is a protein_coding_gene from Dmel. It has one annotated transcript and one polypeptide. Gene sequence location is 3L:11599505..11600065. Its molecular function is unknown. The biological processes in which it is involved are not known. 4 alleles are reported. No phenotypic data is available. The phenotypic classes o…
FBgn0050259	1	0	1	1	0	1	0.769095	0.731771			CG30259	LINK	This gene is referred to in FlyBase by the symbol Dmel\CG30259 (FBgn0050259). It is a protein_coding_gene from Dmel. It has one annotated transcript and one polypeptide. Gene sequence location is 2R:22701345..22704447. Its molecular function is described by: . It is involved in the biological process described with: cilium-dependent cell motility; axonemal dynein complex assembly; regulation of c…
FBgn0039736	2	6.007	1	2	1	4	0.767466	0.52398	0.999974		CG7912	LINK	This gene is referred to in FlyBase by the symbol Dmel\CG7912 (FBgn0039736). It is a protein_coding_gene from Dmel. It has one annotated transcript and one polypeptide. Gene sequence location is 3R:30006034..30009189. Its molecular function is described by: sulfate transmembrane transporter activity; anion:anion antiporter activity; secondary active sulfate transmembrane transporter activity. It …
FBgn0265595	34.003	77.375	48.011	51.001	36	45.152	0.766753	0.015274	0.999974		CG44422	LINK	This gene is referred to in FlyBase by the symbol Dmel\CG44422 (FBgn0265595). It is a protein_coding_gene from Dmel. It has 6 annotated transcripts and 6 polypeptides (all unique). Gene sequence location is X:11219379..11302783. Its molecular function is described by: calcium ion binding. The biological processes in which it is involved are not known. 10 alleles are reported. No phenotypic data i…
FBgn0035000	2	8.66	6.442	4	3.404	6	0.766235	0.385313	0.999974		CG13578	LINK	This gene is referred to in FlyBase by the symbol Dmel\CG13578 (FBgn0035000). It is a protein_coding_gene from Dmel. It has one annotated transcript and one polypeptide. Gene sequence location is 2R:24377831..24378740. Its molecular function is described by: . It is involved in the biological process described with: . 2 alleles are reported. The phenotype of these alleles manifest in: trichogen c…
FBgn0264699	11	24	3	21	5	6	0.764498	0.260814	0.999974		CG43968	LINK	This gene is referred to in FlyBase by the symbol Dmel\CG43968 (FBgn0264699). It is a protein_coding_gene from Dmel. It has one annotated transcript and one polypeptide. Gene sequence location is 3L:23784231..23787405. Its molecular function is described by: . It is involved in the biological process described with: . No alleles are reported.
FBgn0036592	0	3	1	1	0	2	0.764152	0.685582			CG13049	LINK	This gene is referred to in FlyBase by the symbol Dmel\CG13049 (FBgn0036592). It is a protein_coding_gene from Dmel. It has one annotated transcript and one polypeptide. Gene sequence location is 3L:16281132..16281930. Its molecular function is unknown. The biological processes in which it is involved are not known. 3 alleles are reported. The phenotype of these alleles manifest in: mesothoracic …
FBgn0030514	40	77.19	40	43	51	35.013	0.761368	0.0219641	0.999974		CG9941	LINK	This gene is referred to in FlyBase by the symbol Dmel\CG9941 (FBgn0030514). It is a protein_coding_gene from Dmel. It has one annotated transcript and one polypeptide. Gene sequence location is X:13718734..13721977. Its molecular function is described by: zinc ion binding; ubiquitin-protein transferase activity; ubiquitin protein ligase activity. It is involved in the biological process describe…
FBgn0029719	2	6.603	1	2	2.052	3.082	0.760732	0.520326	0.999974		CG15473	LINK	This gene is referred to in FlyBase by the symbol Dmel\CG15473 (FBgn0029719). It is a protein_coding_gene from Dmel. It has one annotated transcript and one polypeptide. Gene sequence location is X:4651955..4654497. Its molecular function is unknown. The biological processes in which it is involved are not known. 2 alleles are reported. No phenotypic data is available. The phenotypic class of all…
FBgn0036809	13	22.508	10	21.115	7	11	0.757585	0.165544	0.999974		CG12477	LINK	This gene is referred to in FlyBase by the symbol Dmel\CG12477 (FBgn0036809). It is a protein_coding_gene from Dmel. It has one annotated transcript and one polypeptide. Gene sequence location is 3L:18721893..18723272. Its molecular function is described by: zinc ion binding; ubiquitin-protein transferase activity; metal ion binding; ubiquitin protein ligase activity. It is involved in the biolog…
FBgn0263774	23.042	28.335	14	16	19	20	0.757269	0.103548	0.999974		CG43691	LINK	This gene is referred to in FlyBase by the symbol Dmel\CG43691 (FBgn0263774). It is a protein_coding_gene from Dmel. It has 2 annotated transcripts and 2 polypeptides (1 unique). Gene sequence location is 2R:13389495..13393361. Its molecular function is described by: . It is involved in the biological process described with: . 4 alleles are reported. No phenotypic data is available. The phenotypi…
FBgn0036417	1	3	4.995	3	0	4	0.756982	0.546574	0.999974		CG7906	LINK	This gene is referred to in FlyBase by the symbol Dmel\CG7906 (FBgn0036417). It is a protein_coding_gene from Dmel. It has 2 annotated transcripts and 2 polypeptides (all unique). Gene sequence location is 3L:14236635..14238272. Its molecular function is unknown. The biological processes in which it is involved are not known. 3 alleles are reported. No phenotypic data is available. The phenotypic…
FBgn0260933	11.057	8.046	13.061	21.126	5.319	5.475	0.756215	0.25652	0.999974		rempA	LINK	The gene reduced mechanoreceptor potential A is referred to in FlyBase by the symbol Dmel\rempA (CG11838, FBgn0260933). It is a protein_coding_gene from Dmel. It has 2 annotated transcripts and 2 polypeptides (all unique). Gene sequence location is 2L:553742..560310. Its molecular function is described by: . It is involved in the biological process described with 8 unique terms, many of which gro…
FBgn0031726	14	16	8	14	12	7	0.755871	0.19251	0.999974		Cyp6a16	LINK	The gene Cyp6a16 is referred to in FlyBase by the symbol Dmel\Cyp6a16 (CG7249, FBgn0031726). It is a protein_coding_gene from Dmel. It has 2 annotated transcripts and 2 polypeptides (1 unique). Gene sequence location is 2L:5620615..5623762. Its molecular function is described by: iron ion binding; monooxygenase activity; heme binding; oxidoreductase activity, acting on paired donors, with incorpo…
FBgn0031540	4	5.001	2	7	1.001	2.001	0.755773	0.473498	0.999974		Pif1	LINK	The gene Pif1 DNA helicase is referred to in FlyBase by the symbol Dmel\Pif1 (CG3238, FBgn0031540). It is a protein_coding_gene from Dmel. It has 2 annotated transcripts and 2 polypeptides (1 unique). Gene sequence location is 2L:3467342..3470004. Its molecular function is described by: DNA helicase activity. It is involved in the biological process described with: DNA replication; DNA duplex unw…
FBgn0083976	17.306	32.816	13.199	27.15	0	27.727	0.754855	0.562099	0.999974		CG34140	LINK	This gene is referred to in FlyBase by the symbol Dmel\CG34140 (FBgn0083976). It is a protein_coding_gene from Dmel. It has one annotated transcript and one polypeptide. Gene sequence location is 3L:182522..184424. Its molecular function is described by: pseudouridine synthase activity; RNA binding. It is involved in the biological process described with: tRNA pseudouridine synthesis. 6 alleles a…
FBgn0085242	11	19.252	19.151	15	15.11	12.182	0.754473	0.139926	0.999974		CG34213	LINK	This gene is referred to in FlyBase by the symbol Dmel\CG34213 (FBgn0085242). It is a protein_coding_gene from Dmel. It has one annotated transcript and one polypeptide. Gene sequence location is 2R:23967124..23967745. Its molecular function is described by: . It is involved in the biological process described with: . One allele is reported. No phenotypic data is available. No phenotypic class da…
FBgn0035718	30	55	54	42	37	40	0.754168	0.0277786	0.999974		CG14820	LINK	This gene is referred to in FlyBase by the symbol Dmel\CG14820 (FBgn0035718). It is a protein_coding_gene from Dmel. It has one annotated transcript and one polypeptide. Gene sequence location is 3L:6932926..6934824. Its molecular function is described by: metallocarboxypeptidase activity; zinc ion binding. It is involved in the biological process described with: proteolysis. 2 alleles are report…
FBgn0010109	2	8	0	0	2	5	0.752192	0.570634	0.999974		dpn	LINK	The gene deadpan is referred to in FlyBase by the symbol Dmel\dpn (CG8704, FBgn0010109). It is a protein_coding_gene from Dmel. It has one annotated transcript and one polypeptide. Gene sequence location is 2R:8228971..8232330. Its molecular function is described by 9 unique terms, many of which group under: binding; molecular function regulator; transcription regulator activity; transcription re…
FBgn0264341	2	4	2	4	0	3	0.751601	0.546411	0.999974		CG43797	LINK	This gene is referred to in FlyBase by the symbol Dmel\CG43797 (FBgn0264341). It is a protein_coding_gene from Dmel. It has one annotated transcript and one polypeptide. Gene sequence location is 2L:4000018..4000806. Its molecular function is unknown. The biological processes in which it is involved are not known. No alleles are reported.
FBgn0085294	2	7	3	5	1	4	0.749986	0.464534	0.999974		CG34265	LINK	This gene is referred to in FlyBase by the symbol Dmel\CG34265 (FBgn0085294). It is a protein_coding_gene from Dmel. It has one annotated transcript and one polypeptide. Gene sequence location is 3L:3268461..3268994. Its molecular function is described by: . It is involved in the biological process described with: . 2 alleles are reported. No phenotypic data is available. No phenotypic class data…
FBgn0041706	3	7	5	7	3	3	0.749647	0.397793	0.999974		CG3253	LINK	This gene is referred to in FlyBase by the symbol Dmel\CG3253 (FBgn0041706). It is a protein_coding_gene from Dmel. It has 2 annotated transcripts and 2 polypeptides (1 unique). Gene sequence location is 2R:24114398..24116359. Its molecular function is described by: glucuronosyltransferase activity. It is involved in the biological process described with: protein O-linked mannosylation. 9 alleles…
FBgn0263079	3	2	3	1	3	3	0.748632	0.521664	0.999974		CG43338	LINK	This gene is referred to in FlyBase by the symbol Dmel\CG43338 (FBgn0263079). It is a protein_coding_gene from Dmel. It has 2 annotated transcripts and 2 polypeptides (all unique). Gene sequence location is 2L:18666892..18671246. Its molecular function is described by: . It is involved in the biological process described with: . 3 alleles are reported. The phenotype of these alleles manifest in: …
FBgn0034288	1	1	1	3	0	0	0.748058	0.706684			CG5084	LINK	This gene is referred to in FlyBase by the symbol Dmel\CG5084 (FBgn0034288). It is a protein_coding_gene from Dmel. It has 2 annotated transcripts and 2 polypeptides (1 unique). Gene sequence location is 2R:18018665..18020211. Its molecular function is unknown. The biological processes in which it is involved are not known. 4 alleles are reported. No phenotypic data is available. The phenotypic c…
FBgn0031373	132	209.303	85.007	161	74.007	132.118	0.747971	0.00770942	0.809684		CG15358	LINK	This gene is referred to in FlyBase by the symbol Dmel\CG15358 (FBgn0031373). It is a protein_coding_gene from Dmel. It has 2 annotated transcripts and 2 polypeptides (1 unique). Gene sequence location is 2L:1882008..1883214. Its molecular function is described by: carbohydrate binding. The biological processes in which it is involved are not known. 3 alleles are reported. No phenotypic data is a…
FBgn0286075	29	55.864	41.065	49.412	37.386	22.754	0.745675	0.0380321	0.999974		DNAlig3	LINK	The gene DNA ligase 3 is referred to in FlyBase by the symbol Dmel\DNAlig3 (CG17227, FBgn0286075). It is a protein_coding_gene from Dmel. It has one annotated transcript and one polypeptide. Gene sequence location is 3R:12399011..12401839. Its molecular function is described by: DNA ligase (ATP) activity; DNA binding; ATP binding. It is involved in the biological process described with 8 unique t…
FBgn0039642	20	39.058	28	32	17.034	26	0.745415	0.0615967	0.999974		CG11882	LINK	This gene is referred to in FlyBase by the symbol Dmel\CG11882 (FBgn0039642). It is a protein_coding_gene from Dmel. It has 2 annotated transcripts and 2 polypeptides (1 unique). Gene sequence location is 3R:29147016..29148172. Its molecular function is unknown. The biological processes in which it is involved are not known. 6 alleles are reported. No phenotypic data is available. The phenotypic …
FBgn0036819	13	26	12.027	17	10	16	0.745085	0.140148	0.999974		Dysb	LINK	The gene Dysbindin is referred to in FlyBase by the symbol Dmel\Dysb (CG6856, FBgn0036819). It is a protein_coding_gene from Dmel. It has 2 annotated transcripts and 2 polypeptides (1 unique). Gene sequence location is 3L:18867771..18869219. Its molecular function is described by: protein binding. It is involved in the biological process described with 12 unique terms, many of which group under: …
FBgn0267255	1	3	1	1	1	2	0.744816	0.625576			CG45691	LINK	This gene is referred to in FlyBase by the symbol Dmel\CG45691 (FBgn0267255). It is a protein_coding_gene from Dmel. It has one annotated transcript and one polypeptide. Gene sequence location is 2L:17320250..17320712. Its molecular function is described by: . It is involved in the biological process described with: . No alleles are reported.
FBgn0033943	1	3	1	1	1	2	0.744816	0.625576			CG12869	LINK	This gene is referred to in FlyBase by the symbol Dmel\CG12869 (FBgn0033943). It is a protein_coding_gene from Dmel. It has 4 annotated transcripts and 4 polypeptides (2 unique). Gene sequence location is 2R:14591203..14595617. Its molecular function is unknown. The biological processes in which it is involved are not known. 5 alleles are reported. No phenotypic data is available. The phenotypic …
FBgn0029590	1	9.926	8	7	6	2	0.742738	0.397706	0.999974		CG14811	LINK	This gene is referred to in FlyBase by the symbol Dmel\CG14811 (FBgn0029590). It is a protein_coding_gene from Dmel. It has one annotated transcript and one polypeptide. Gene sequence location is X:1821469..1822381. Its molecular function is unknown. The biological processes in which it is involved are not known. 4 alleles are reported. No phenotypic data is available. The phenotypic class of all…
FBgn0004607	28.228	60.848	33.117	34.054	31.911	36.736	0.741711	0.0349655	0.999974		zfh2	LINK	The gene Zn finger homeodomain 2 is referred to in FlyBase by the symbol Dmel\zfh2 (CG1449, FBgn0004607). It is a protein_coding_gene from Dmel. It has 3 annotated transcripts and 3 polypeptides (all unique). Gene sequence location is 4:501810..540874. Its molecular function is described by: DNA binding; RNA polymerase II cis-regulatory region sequence-specific DNA binding; RNA polymerase II tran…
FBgn0053910	3.849	3.608	10.238	6.365	1.75	8.621	0.741116	0.417917	0.999974		His2B:CG33910	LINK	The gene His2B:CG33910 is referred to in FlyBase by the symbol Dmel\His2B:CG33910 (CG33910, FBgn0053910). It is a protein_coding_gene from Dmel. It has one annotated transcript and one polypeptide. Gene sequence location is 2L:21418112..21418706. Its molecular function is described by: protein heterodimerization activity; DNA binding. It is involved in the biological process described with: chrom…
FBgn0005624	9	26.052	9	15	13	8	0.73938	0.187551	0.999974		Psc	LINK	The gene Posterior sex combs is referred to in FlyBase by the symbol Dmel\Psc (CG3886, FBgn0005624). It is a protein_coding_gene from Dmel. It has 3 annotated transcripts and 3 polypeptides (1 unique). Gene sequence location is 2R:12965997..12980994. Its molecular function is described by: chromatin binding; DNA binding; sequence-specific DNA binding; promoter-specific chromatin binding; zinc ion…
FBgn0036181	3	3	3	3	3	2	0.739126	0.498491	0.999974		Muc68Ca	LINK	The gene Mucin 68Ca is referred to in FlyBase by the symbol Dmel\Muc68Ca (CG18331, FBgn0036181). It is a protein_coding_gene from Dmel. It has one annotated transcript and one polypeptide. Gene sequence location is 3L:11610578..11620101. Its molecular function is described by: extracellular matrix structural constituent. The biological processes in which it is involved are not known. 2 alleles ar…
FBgn0085290	10.225	7.518	5.403	8.488	7.516	5.265	0.738998	0.311917	0.999974		CG34261	LINK	This gene is referred to in FlyBase by the symbol Dmel\CG34261 (FBgn0085290). It is a protein_coding_gene from Dmel. It has one annotated transcript and one polypeptide. Gene sequence location is 3L:21196831..21197738. Its molecular function is described by: ADP-ribosylglutamate hydrolase activity; purine nucleoside binding. It is involved in the biological process described with: peptidyl-glutam…
FBgn0031036	25	37.035	34	27	33.113	23.049	0.738062	0.060931	0.999974		CG14220	LINK	This gene is referred to in FlyBase by the symbol Dmel\CG14220 (FBgn0031036). It is a protein_coding_gene from Dmel. It has 2 annotated transcripts and 2 polypeptides (1 unique). Gene sequence location is X:19599803..19601851. Its molecular function is described by: histone deacetylase binding; histone deacetylase activity. It is involved in the biological process described with: negative regulat…
FBgn0264253	1	0	1	1	1	0	0.737449	0.74128			Send2	LINK	The gene Spermathecal endopeptidase 2 is referred to in FlyBase by the symbol Dmel\Send2 (CG18125, FBgn0264253). It is a protein_coding_gene from Dmel. It has one annotated transcript and one polypeptide. Gene sequence location is 2L:14345915..14346688. Its molecular function is described by: serine-type endopeptidase activity. It is involved in the biological process described with: proteolysis.…
FBgn0038452	1	0	1	1	1	0	0.737449	0.74128			CG14905	LINK	This gene is referred to in FlyBase by the symbol Dmel\CG14905 (FBgn0038452). It is a protein_coding_gene from Dmel. It has one annotated transcript and one polypeptide. Gene sequence location is 3R:16622735..16624717. Its molecular function is unknown. It is involved in the biological process described with: outer dynein arm assembly; cilium movement. 2 alleles are reported. No phenotypic data i…
FBgn0085377	28	80.27	26.639	33.627	37.521	37.52	0.736185	0.049134	0.999974		CG34348	LINK	This gene is referred to in FlyBase by the symbol Dmel\CG34348 (FBgn0085377). It is a protein_coding_gene from Dmel. It has one annotated transcript and one polypeptide. Gene sequence location is X:11339873..11344734. Its molecular function is described by: transferase activity, transferring acyl groups. The biological processes in which it is involved are not known. 8 alleles are reported. No ph…
FBgn0263035	4.113	5.051	1.013	1.005	7	0	0.73616	0.545809	0.999974		CG43330	LINK	This gene is referred to in FlyBase by the symbol Dmel\CG43330 (FBgn0263035). It is a protein_coding_gene from Dmel. It has one annotated transcript and one polypeptide. Gene sequence location is 3L:22503869..22504423. Its molecular function is described by: . It is involved in the biological process described with: . One allele is reported. No phenotypic data is available. No phenotypic class da…
FBgn0259933	74.206	161.756	87.577	88.882	112.022	66.561	0.735686	0.0105026	0.933417		Dpm2	LINK	The gene Dolichyl-phosphate mannosyltransferase subunit 2 is referred to in FlyBase by the symbol Dmel\Dpm2 (CG42456, FBgn0259933). It is a protein_coding_gene from Dmel. It has one annotated transcript and one polypeptide. Gene sequence location is 3L:3319555..3322489. Its molecular function is described by: dolichyl-phosphate beta-D-mannosyltransferase activity; enzyme regulator activity. It is…
FBgn0053057	30.602	88.247	18.631	39.107	30.618	39.491	0.734426	0.0673242	0.999974		CG33057	LINK	This gene is referred to in FlyBase by the symbol Dmel\CG33057 (FBgn0053057). It is a protein_coding_gene from Dmel. It has 2 annotated transcripts and 2 polypeptides (1 unique). Gene sequence location is 3L:8402168..8405277. Its molecular function is described by: tRNA 2'-phosphotransferase activity. It is involved in the biological process described with: tRNA splicing, via endonucleolytic clea…
FBgn0038397	2.156	13.965	5.389	7.341	6.147	3.169	0.733762	0.375888	0.999974		CG10185	LINK	This gene is referred to in FlyBase by the symbol Dmel\CG10185 (FBgn0038397). It is a protein_coding_gene from Dmel. It has one annotated transcript and one polypeptide. Gene sequence location is 3R:16060589..16067594. Its molecular function is described by: . It is involved in the biological process described with: regulation of DNA-dependent DNA replication initiation; rRNA processing. 3 allele…
FBgn0259233	0	2.011	6	2	3.03	2.008	0.733091	0.559363	0.999974		CG42331	LINK	This gene is referred to in FlyBase by the symbol Dmel\CG42331 (FBgn0259233). It is a protein_coding_gene from Dmel. It has 3 annotated transcripts and 3 polypeptides (2 unique). Gene sequence location is 3R:24772181..24784562. Its molecular function is described by: heme binding; peroxidase activity. It is involved in the biological process described with: oxidation-reduction process; response t…
FBgn0035921	0	9	2	2	1	5.089	0.732912	0.549485	0.999974		CG13305	LINK	This gene is referred to in FlyBase by the symbol Dmel\CG13305 (FBgn0035921). It is a protein_coding_gene from Dmel. It has 2 annotated transcripts and 2 polypeptides (all unique). Gene sequence location is 3L:8644916..8646822. Its molecular function is unknown. The biological processes in which it is involved are not known. 2 alleles are reported. No phenotypic data is available. The phenotypic …
FBgn0028956	12.292	19.148	5.214	20.489	6.204	6.291	0.732817	0.251236	0.999974		mthl3	LINK	The gene methuselah-like 3 is referred to in FlyBase by the symbol Dmel\mthl3 (CG6530, FBgn0028956). It is a protein_coding_gene from Dmel. It has 3 annotated transcripts and 3 polypeptides (1 unique). Gene sequence location is 2R:17448533..17452598. Its molecular function is described by: G protein-coupled receptor activity. It is involved in the biological process described with: response to st…
FBgn0034670	9	6	9	7	6	9	0.732079	0.296228	0.999974		CG13488	LINK	This gene is referred to in FlyBase by the symbol Dmel\CG13488 (FBgn0034670). It is a protein_coding_gene from Dmel. It has 3 annotated transcripts and 3 polypeptides (all unique). Gene sequence location is 2R:21951592..21952562. Its molecular function is unknown. The biological processes in which it is involved are not known. 2 alleles are reported. No phenotypic data is available. The phenotypi…
FBgn0052673	5.15	10.052	11.047	8.59	0	15.612	0.731361	0.363053	0.999974		Rab9E	LINK	The gene Rab at 9E is referred to in FlyBase by the symbol Dmel\Rab9E (CG32673, FBgn0052673). It is a protein_coding_gene from Dmel. It has one annotated transcript and one polypeptide. Gene sequence location is X:10660955..10661843. Its molecular function is described by: GTP binding; GTPase activity. It is involved in the biological process described with 7 unique terms, many of which group und…
FBgn0260431	3	4	5	6	3	2	0.730042	0.450601	0.999974		CG42526	LINK	This gene is referred to in FlyBase by the symbol Dmel\CG42526 (FBgn0260431). It is a protein_coding_gene from Dmel. It has one annotated transcript and one polypeptide. Gene sequence location is 3L:9433686..9435399. Its molecular function is described by: . It is involved in the biological process described with: regulation of transcription by RNA polymerase II. One allele is reported. No phenot…
FBgn0038769	9	14.23	8	11	7	9.288	0.72969	0.237554	0.999974		Regnase-1	LINK	The gene Regnase 1 is referred to in FlyBase by the symbol Dmel\Regnase-1 (CG10889, FBgn0038769). It is a protein_coding_gene from Dmel. It has one annotated transcript and one polypeptide. Gene sequence location is 3R:20033881..20036056. Its molecular function is described by: metal ion binding; endoribonuclease activity; mRNA binding. It is involved in the biological process described with: RNA…
FBgn0035522	2	0	1	1	1	1.001	0.728144	0.686092			CG1273	LINK	This gene is referred to in FlyBase by the symbol Dmel\CG1273 (FBgn0035522). It is a protein_coding_gene from Dmel. It has one annotated transcript and one polypeptide. Gene sequence location is 3L:4263719..4277778. Its molecular function is unknown. The biological processes in which it is involved are not known. 8 alleles are reported. No phenotypic data is available. The phenotypic classes of a…
FBgn0004102	20	77	18	34.001	20.096	37.007	0.727762	0.0908494	0.999974		oc	LINK	The gene ocelliless is referred to in FlyBase by the symbol Dmel\oc (CG12154, FBgn0004102). It is a protein_coding_gene from Dmel. It has 6 annotated transcripts and 6 polypeptides (4 unique). Gene sequence location is X:8630159..8650681. Its molecular function is described by: DNA-binding transcription activator activity, RNA polymerase II-specific; sequence-specific DNA binding; protein homodim…
FBgn0043791	46	113.115	36.012	39	64	52.069	0.727422	0.0431574	0.999974		phu	LINK	The gene phurba tashi is referred to in FlyBase by the symbol Dmel\phu (CG8147, FBgn0043791). It is a protein_coding_gene from Dmel. It has one annotated transcript and one polypeptide. Gene sequence location is 3R:9494801..9496723. Its molecular function is described by: alkaline phosphatase activity. It is involved in the biological process described with: response to nicotine; dephosphorylatio…
FBgn0043791	46	113.115	36.012	39	64	52.069	0.727422	0.0431574	0.999974		phu	LINK	The gene phurba tashi is referred to in FlyBase by the symbol Dmel\phu (CG8147, FBgn0043791). It is a protein_coding_gene from Dmel. It has one annotated transcript and one polypeptide. Gene sequence location is 3R:9494801..9496723. Its molecular function is described by: alkaline phosphatase activity. It is involved in the biological process described with: response to nicotine; dephosphorylatio…
FBgn0001206	11	13.335	8	9	9	10	0.726283	0.234194	0.999974		Hmr	LINK	The gene Hybrid male rescue is referred to in FlyBase by the symbol Dmel\Hmr (CG1619, FBgn0001206). It is a protein_coding_gene from Dmel. It has one annotated transcript and one polypeptide. Gene sequence location is X:10590920..10595855. Its molecular function is described by: protein binding; unfolded protein binding. It is involved in the biological process described with: negative regulation…
FBgn0267977	4	18.195	6	11.997	5.603	7.2	0.725333	0.299692	0.999974		mh	LINK	The gene maternal haploid is referred to in FlyBase by the symbol Dmel\mh (CG9203, FBgn0267977). It is a protein_coding_gene from Dmel. It has one annotated transcript and one polypeptide. Gene sequence location is X:15472804..15475400. Its molecular function is described by: DNA binding; polyubiquitin modification-dependent protein binding. It is involved in the biological process described with…
FBgn0263237	8	30	18	26	13	9.065	0.724831	0.16273	0.999974		Cdk7	LINK	The gene Cyclin-dependent kinase 7 is referred to in FlyBase by the symbol Dmel\Cdk7 (CG3319, FBgn0263237). It is a protein_coding_gene from Dmel. It has one annotated transcript and one polypeptide. Gene sequence location is X:5307465..5308983. Its molecular function is described by: RNA polymerase II CTD heptapeptide repeat kinase activity; protein serine/threonine kinase activity; cyclin-depen…
FBgn0263237	8	30	18	26	13	9.065	0.724831	0.16273	0.999974		Cdk7	LINK	The gene Cyclin-dependent kinase 7 is referred to in FlyBase by the symbol Dmel\Cdk7 (CG3319, FBgn0263237). It is a protein_coding_gene from Dmel. It has one annotated transcript and one polypeptide. Gene sequence location is X:5307465..5308983. Its molecular function is described by: RNA polymerase II CTD heptapeptide repeat kinase activity; protein serine/threonine kinase activity; cyclin-depen…
FBgn0067312	6	10	3	5	5	6	0.724785	0.363647	0.999974		CheB38a	LINK	The gene Chemosensory protein B 38a is referred to in FlyBase by the symbol Dmel\CheB38a (CG33320, FBgn0067312). It is a protein_coding_gene from Dmel. It has one annotated transcript and one polypeptide. Gene sequence location is 2L:20817815..20818532. Its molecular function is described by: lipid binding. It is involved in the biological process described with: detection of pheromone; sensory p…
FBgn0053531	10	11.063	2	6	3	11	0.723517	0.35602	0.999974		Ddr	LINK	The gene Discoidin domain receptor is referred to in FlyBase by the symbol Dmel\Ddr (CG33531, FBgn0053531). It is a protein_coding_gene from Dmel. It has 3 annotated transcripts and 3 polypeptides (2 unique). Gene sequence location is 2L:6253123..6323466. Its molecular function is described by: transmembrane receptor protein tyrosine kinase activity; ATP binding; collagen binding; protein tyrosin…
FBgn0284222	33.084	74.575	36.43	30.267	33.14	55.365	0.723422	0.0496493	0.999974		CG46306	LINK	This gene is referred to in FlyBase by the symbol Dmel\CG46306 (FBgn0284222). It is a protein_coding_gene from Dmel. It has one annotated transcript and one polypeptide. Gene sequence location is X:16826681..16835520. Its molecular function is unknown. The biological processes in which it is involved are not known. One allele is reported. No phenotypic data is available. No phenotypic class data …
FBgn0039180	0	0	2	1	0	1	0.722089	0.761973			CG5715	LINK	This gene is referred to in FlyBase by the symbol Dmel\CG5715 (FBgn0039180). It is a protein_coding_gene from Dmel. It has one annotated transcript and one polypeptide. Gene sequence location is 3R:24293366..24294399. Its molecular function is described by: zinc ion binding; metalloendopeptidase activity. It is involved in the biological process described with: proteolysis. 7 alleles are reported…
FBgn0037127	1	0	2	1	0	2	0.719812	0.70331			CG14566	LINK	This gene is referred to in FlyBase by the symbol Dmel\CG14566 (FBgn0037127). It is a protein_coding_gene from Dmel. It has 2 annotated transcripts and 2 polypeptides (1 unique). Gene sequence location is 3L:21739479..21740309. Its molecular function is unknown. The biological processes in which it is involved are not known. 2 alleles are reported. No phenotypic data is available. No phenotypic c…
FBgn0038590	20.286	31.539	25.89	27.314	26.634	14.414	0.719558	0.0938967	0.999974		CG12320	LINK	This gene is referred to in FlyBase by the symbol Dmel\CG12320 (FBgn0038590). It is a protein_coding_gene from Dmel. It has 2 annotated transcripts and 2 polypeptides (1 unique). Gene sequence location is 3R:18251069..18252734. Its molecular function is unknown. It is involved in the biological process described with: spliceosomal tri-snRNP complex assembly. 4 alleles are reported. The phenotype …
FBgn0034052	44	69.51	29	45	26.015	52.13	0.718987	0.0452268	0.999974		CG8299	LINK	This gene is referred to in FlyBase by the symbol Dmel\CG8299 (FBgn0034052). It is a protein_coding_gene from Dmel. It has one annotated transcript and one polypeptide. Gene sequence location is 2R:15940610..15941483. Its molecular function is described by: serine-type endopeptidase activity. It is involved in the biological process described with: proteolysis. 4 alleles are reported. No phenotyp…
FBgn0031257	8	17.15	9	10	7.026	12	0.7184	0.233706	0.999974		CG4133	LINK	This gene is referred to in FlyBase by the symbol Dmel\CG4133 (FBgn0031257). It is a protein_coding_gene from Dmel. It has 3 annotated transcripts and 3 polypeptides (all unique). Gene sequence location is 2L:455531..458745. Its molecular function is described by: nucleic acid binding. The biological processes in which it is involved are not known. 4 alleles are reported. The phenotypes of these …
FBgn0030955	101.752	281.343	76	141.075	111.516	119.353	0.71798	0.0128316	0.999974		CG6891	LINK	This gene is referred to in FlyBase by the symbol Dmel\CG6891 (FBgn0030955). It is a protein_coding_gene from Dmel. It has 3 annotated transcripts and 3 polypeptides (2 unique). Gene sequence location is X:18775228..18781345. Its molecular function is described by: actin filament binding. It is involved in the biological process described with: regulation of actin filament polymerization. 7 allel…
FBgn0250836	133.016	305.727	59	190	57	169.423	0.717236	0.250756	0.999974		Acbp3	LINK	The gene Acyl-CoA binding protein 3 is referred to in FlyBase by the symbol Dmel\Acbp3 (CG8628, FBgn0250836). It is a protein_coding_gene from Dmel. It has 2 annotated transcripts and 2 polypeptides (1 unique). Gene sequence location is 3L:7130874..7131505. Its molecular function is described by: fatty-acyl-CoA binding. The biological processes in which it is involved are not known. 4 alleles are…
[truncated: 15,073 more rows]

## Sheet: P384RvsWT
gene_id	P384R-1	P384R-2	P384R-3	WT-1	WT-2	WT-3	log2FC	pvalue	padj	DIFFEXP	gene_symbol	FLYBASE	desc
[truncated: 15,922 more rows]

## Sheet: DecWTvsWT
gene_id	WT-1	WT-2	WT-3	DecWT-1	DecWT-2	DecWT-3	log2FC	pvalue	padj	DIFFEXP	gene_name	FLYBASE	desc
[truncated: 15,922 more rows]
