# Supplementary material for: A familial natural short sleep mutation promotes healthy aging and extends lifespan in Drosophila
Source: Research Square preprint supplement (doi:10.21203/rs.3.rs-2882949/v1), 2023-06-02
Supplement: Supplementary file 4 [file ee4bf2c445c2843ac151bebf.xlsx]

## Sheet: Table S2
Descriptive statistics					Log-rank test results
Genotype	n	Mean (days)	SEM		Condition	χ2	p-value	Corrected p-value
Figure 3A					Figure 3A
WT	93	63.34	1.58		WT v.s. dec2WT	3.02	0.0823	0.1645
dec2WT	93	59.97	1.56		WT v.s. dec2P384R	70.11	0	0
dec2P384R	66	81.65	2.60		dec2WT v.s. dec2P384R	76.88	0	0
Figure 3B					Figure 3B
WT	115	9.27	0.55		WT v.s. dec2WT	75.19	0	0
dec2WT	97	16.49	0.64		WT v.s. dec2P384R	40.27	0	0
dec2P384R	85	15.59	0.71		dec2WT v.s. dec2P384R	2.07	0.1502	0.3004
Figure 3C					Figure 3C
WT	116	46.59	1.24		WT v.s. dec2WT	32.91	9.6e-09	1.9e-08
dec2WT	98	38.52	0.91		WT v.s. dec2P384R	42.52	0	0
dec2P384R	104	59.75	1.11		dec2WT v.s. dec2P384R	151.56	0	0
Figure 3D					Figure 3D
WT	112	4.81	0.33		WT v.s. dec2WT	49.45	0	0
dec2WT	105	9.28	0.55		WT v.s. dec2P384R	38.49	0	0
dec2P384R	128	8.23	0.34		dec2WT v.s. dec2P384R	11.34	0.0008	0.0015
Genotype	n	Mean (hours)	SEM		Condition	χ2	p-value	Corrected p-value
Figure 4J					Figure 4J
WT	185	51.50	0.46		WT v.s. dec2WT	2.33	0.1271	0.2543
dec2WT	129	52.56	0.63		WT v.s. dec2P384R	325.88	0	0
dec2P384R	176	80.45	0.97		dec2WT v.s. dec2P384R	271.72	0	0
Genotype	n	Mean (days)	SEM		Condition	χ2	p-value	Corrected p-value
Figure 4K					Figure 4K
WT	96	6.20	0.13		WT v.s. dec2WT	8.82	0.003	0.006
dec2WT	94	5.51	0.15		WT v.s. dec2P384R	19.95	7.9e-06	1.6e-05
dec2P384R	110	6.91	0.14		dec2WT v.s. dec2P384R	49.71	0	0
Genotype	n	Mean (hours)	SEM		Condition	χ2	p-value	Corrected p-value
Figure 6					Figure 6
GR23E10:LexA/+	43	39.67	1.03		GR23E10:LexA/+ v.s. GR23E10>lexAop-dec2WT	7.66	0.0057	0.017
lexAop-dec2WT	44	44.45	1.47		GR23E10:LexA/+ v.s. GR23E10>lexAop-dec2P384R	65.31	0	0
lexAop-dec2P384R	73	56.38	1.16		GR23E10>lexAop-dec2P384R v.s. GR23E10>lexAop-dec2WT	34.51	4.2e-09	1.7e-08
lexAop-dec2P384R/mtnBi	70	44.23	0.92		GR23E10:LexA/+ v.s. lexAop-dec2P384R/mtnBi	12.71	0.0004	0.0025
lexAop-dec2P384R/mtnCi	117	63.18	1.10		GR23E10:LexA/+ v.s. lexAop-dec2P384R/mtnCi	117.04	0	0
lexAop-dec2P384R/mtnDi	111	55.68	0.94		GR23E10:LexA/+ v.s. lexAop-dec2P384R/mtnDi	75.43	0	0
lexAop-dec2P384R/nmdmci	54	59.11	1.36		GR23E10:LexA/+ v.s. lexAop-dec2P384R/nmdmci	61.7	0	0
lexAop-dec2P384R/CG11699i	37	49.62	0.67		GR23E10:LexA/+ v.s. lexAop-dec2P384R/CG11699i	36.27	0	0
					GR23E10>lexAop-dec2P384R v.s. lexAop-dec2P384R/mtnBi	57.87	0	0
					GR23E10>lexAop-dec2P384R v.s. lexAop-dec2P384R/mtnCi	17.49	2.9e-05	0.0001
					GR23E10>lexAop-dec2P384R v.s. lexAop-dec2P384R/mtnDi	0.3	0.5809	1
					GR23E10>lexAop-dec2P384R v.s. lexAop-dec2P384R/nmdmci	2.55	0.11	0.7702
					GR23E10>lexAop-dec2P384R v.s. lexAop-dec2P384R/CG11699i	20.44	6.2e-06	1.8e-05
					GR23E10>lexAop-dec2WT v.s. lexAop-dec2P384R/mtnBi	0.08	0.7836	1
					GR23E10>lexAop-dec2WT v.s. lexAop-dec2P384R/mtnCi	75.07	0	0
					GR23E10>lexAop-dec2WT v.s. lexAop-dec2P384R/mtnDi	35.48	2.6e-09	1e-08
					GR23E10>lexAop-dec2WT v.s. lexAop-dec2P384R/nmdmci	36.94	0	0
					GR23E10>lexAop-dec2WT v.s. lexAop-dec2P384R/CG11699i	6.1	0.0135	0.0404
